# Supplementary material for: A Comparative Perspective on Three Primate Species’ Responses to a Pictorial Emotional Stroop Task
Source: Animals (Basel). 2021 Feb 24;11(3):588. doi: 10.3390/ani11030588 (PMC7995981; doi:10.3390/ani11030588)
Supplement: Supplementary file 1 [file animals-11-00588-s001.xlsx]

## Sheet: TestPhase1
SpeciesRaw	Species	Color	Date	Time	Computer	Test	Subject	InputFile	Trial	Image size	NoOfStimuli	MTL	ITI	Background	ImageLocation	Image1	Image2	Image1Location	Image2Location	ImageChosen	BorderChosen	Correct	Condition	Latency	Experimenter	ImagePairing	Session	ExcludeLatency	LatencyLog
Gorilla	Ape	Yellow	43335	0.374306	FisherCenter-PC	Adv Pref FC	Azizi	Azizi phase 3-1.txt	1	290	2	None	4000	White	Scattered	115_mug_blue.jpg	116_mug_yellow.jpg	24	20	116_mug_yellow.jpg	Yellow	1	Control	1595	CE	115_mug_blue.jpg 116_mug_yellow.jpg	1	N	3.20276
Gorilla	Ape	Yellow	43335	0.374306	FisherCenter-PC	Adv Pref FC	Azizi	Azizi phase 3-1.txt	2	290	2	None	4000	White	Scattered	125_star_yellow_blue.jpg	126_star_yellow_yellow.jpg	15	24	126_star_yellow_yellow.jpg	Yellow	1	Congruent	999	CE	125_star_yellow_blue.jpg 126_star_yellow_yellow.jpg	1	N	2.99957
Gorilla	Ape	Yellow	43335	0.374306	FisherCenter-PC	Adv Pref FC	Azizi	Azizi phase 3-1.txt	3	290	2	None	4000	White	Scattered	109_fork_blue.jpg	110_fork_yellow.jpg	17	20	109_fork_blue.jpg	Blue	0	Control	947	CE	109_fork_blue.jpg 110_fork_yellow.jpg	1	N	2.97635
Gorilla	Ape	Yellow	43335	0.374306	FisherCenter-PC	Adv Pref FC	Azizi	Azizi phase 3-1.txt	4	290	2	None	4000	White	Scattered	123_star_blue_blue.jpg	124_star_blue_yellow.jpg	24	21	124_star_blue_yellow.jpg	Yellow	1	Incongruent	1273	CE	123_star_blue_blue.jpg 124_star_blue_yellow.jpg	1	N	3.10483
Gorilla	Ape	Yellow	43335	0.374306	FisherCenter-PC	Adv Pref FC	Azizi	Azizi phase 3-1.txt	5	290	2	None	4000	White	Scattered	105_cross_yellow_blue.jpg	106_cross_yellow_yellow.jpg	14	11	106_cross_yellow_yellow.jpg	Yellow	1	Congruent	1002	CE	105_cross_yellow_blue.jpg 106_cross_yellow_yellow.jpg	1	N	3.00087
Gorilla	Ape	Yellow	43335	0.374306	FisherCenter-PC	Adv Pref FC	Azizi	Azizi phase 3-1.txt	6	290	2	None	4000	White	Scattered	125_star_yellow_blue.jpg	126_star_yellow_yellow.jpg	13	21	126_star_yellow_yellow.jpg	Yellow	1	Congruent	1313	CE	125_star_yellow_blue.jpg 126_star_yellow_yellow.jpg	1	N	3.11826
Gorilla	Ape	Yellow	43335	0.374306	FisherCenter-PC	Adv Pref FC	Azizi	Azizi phase 3-1.txt	7	290	2	None	4000	White	Scattered	115_mug_blue.jpg	116_mug_yellow.jpg	23	18	116_mug_yellow.jpg	Yellow	1	Control	900	CE	115_mug_blue.jpg 116_mug_yellow.jpg	1	N	2.95424
Gorilla	Ape	Yellow	43335	0.374306	FisherCenter-PC	Adv Pref FC	Azizi	Azizi phase 3-1.txt	8	290	2	None	4000	White	Scattered	111_heart_blue_blue.jpg	112_heart_blue_yellow.jpg	18	14	112_heart_blue_yellow.jpg	Yellow	1	Incongruent	5097	CE	111_heart_blue_blue.jpg 112_heart_blue_yellow.jpg	1	Y	3.70731
Gorilla	Ape	Yellow	43335	0.374306	FisherCenter-PC	Adv Pref FC	Azizi	Azizi phase 3-1.txt	9	290	2	None	4000	White	Scattered	121_square_yellow_blue.jpg	122_square_yellow_yellow.jpg	17	22	122_square_yellow_yellow.jpg	Yellow	1	Congruent	894	CE	121_square_yellow_blue.jpg 122_square_yellow_yellow.jpg	1	N	2.95134
Gorilla	Ape	Yellow	43335	0.374306	FisherCenter-PC	Adv Pref FC	Azizi	Azizi phase 3-1.txt	10	290	2	None	4000	White	Scattered	101_bicycle_blue.jpg	102_bicycle_yellow.jpg	16	25	102_bicycle_yellow.jpg	Yellow	1	Control	1414	CE	101_bicycle_blue.jpg 102_bicycle_yellow.jpg	1	N	3.15045
Gorilla	Ape	Yellow	43335	0.374306	FisherCenter-PC	Adv Pref FC	Azizi	Azizi phase 3-1.txt	11	290	2	None	4000	White	Scattered	105_cross_yellow_blue.jpg	106_cross_yellow_yellow.jpg	16	19	105_cross_yellow_blue.jpg	Blue	0	Congruent	1107	CE	105_cross_yellow_blue.jpg 106_cross_yellow_yellow.jpg	1	N	3.04415
Gorilla	Ape	Yellow	43335	0.374306	FisherCenter-PC	Adv Pref FC	Azizi	Azizi phase 3-1.txt	12	290	2	None	4000	White	Scattered	107_fidget_spinner_blue.jpg	108_fidget_spinner_yellow.jpg	14	11	108_fidget_spinner_yellow.jpg	Yellow	1	Control	927	CE	107_fidget_spinner_blue.jpg 108_fidget_spinner_yellow.jpg	1	N	2.96708
Gorilla	Ape	Yellow	43335	0.374306	FisherCenter-PC	Adv Pref FC	Azizi	Azizi phase 3-1.txt	13	290	2	None	4000	White	Scattered	125_star_yellow_blue.jpg	126_star_yellow_yellow.jpg	15	20	126_star_yellow_yellow.jpg	Yellow	1	Congruent	1104	CE	125_star_yellow_blue.jpg 126_star_yellow_yellow.jpg	1	N	3.04297
Gorilla	Ape	Yellow	43335	0.374306	FisherCenter-PC	Adv Pref FC	Azizi	Azizi phase 3-1.txt	14	290	2	None	4000	White	Scattered	103_cross_blue_blue.jpg	104_cross_blue_yellow.jpg	13	18	104_cross_blue_yellow.jpg	Yellow	1	Incongruent	1088	CE	103_cross_blue_blue.jpg 104_cross_blue_yellow.jpg	1	N	3.03663
Gorilla	Ape	Yellow	43335	0.374306	FisherCenter-PC	Adv Pref FC	Azizi	Azizi phase 3-1.txt	15	290	2	None	4000	White	Scattered	109_fork_blue.jpg	110_fork_yellow.jpg	22	14	109_fork_blue.jpg	Blue	0	Control	518	CE	109_fork_blue.jpg 110_fork_yellow.jpg	1	N	2.71433
Gorilla	Ape	Yellow	43335	0.374306	FisherCenter-PC	Adv Pref FC	Azizi	Azizi phase 3-1.txt	16	290	2	None	4000	White	Scattered	121_square_yellow_blue.jpg	122_square_yellow_yellow.jpg	20	25	121_square_yellow_blue.jpg	Blue	0	Congruent	1197	CE	121_square_yellow_blue.jpg 122_square_yellow_yellow.jpg	1	N	3.07809
Gorilla	Ape	Yellow	43335	0.374306	FisherCenter-PC	Adv Pref FC	Azizi	Azizi phase 3-1.txt	17	290	2	None	4000	White	Scattered	119_square_blue_blue.jpg	120_square_blue_yellow.jpg	16	24	120_square_blue_yellow.jpg	Yellow	1	Incongruent	1868	CE	119_square_blue_blue.jpg 120_square_blue_yellow.jpg	1	N	3.27138
Gorilla	Ape	Yellow	43335	0.374306	FisherCenter-PC	Adv Pref FC	Azizi	Azizi phase 3-1.txt	18	290	2	None	4000	White	Scattered	113_heart_yellow_blue.jpg	114_heart_yellow_yellow.jpg	12	13	113_heart_yellow_blue.jpg	Blue	0	Congruent	1118	CE	113_heart_yellow_blue.jpg 114_heart_yellow_yellow.jpg	1	N	3.04844
Gorilla	Ape	Yellow	43335	0.374306	FisherCenter-PC	Adv Pref FC	Azizi	Azizi phase 3-1.txt	19	290	2	None	4000	White	Scattered	117_shovel_blue.jpg	118_shovel_yellow.jpg	21	25	118_shovel_yellow.jpg	Yellow	1	Control	1300	CE	117_shovel_blue.jpg 118_shovel_yellow.jpg	1	N	3.11394
Gorilla	Ape	Yellow	43335	0.374306	FisherCenter-PC	Adv Pref FC	Azizi	Azizi phase 3-1.txt	20	290	2	None	4000	White	Scattered	103_cross_blue_blue.jpg	104_cross_blue_yellow.jpg	15	21	104_cross_blue_yellow.jpg	Yellow	1	Incongruent	1222	CE	103_cross_blue_blue.jpg 104_cross_blue_yellow.jpg	1	N	3.08707
Gorilla	Ape	Yellow	43335	0.374306	FisherCenter-PC	Adv Pref FC	Azizi	Azizi phase 3-1.txt	21	290	2	None	4000	White	Scattered	107_fidget_spinner_blue.jpg	108_fidget_spinner_yellow.jpg	21	23	108_fidget_spinner_yellow.jpg	Yellow	1	Control	1849	CE	107_fidget_spinner_blue.jpg 108_fidget_spinner_yellow.jpg	1	N	3.26694
Gorilla	Ape	Yellow	43335	0.374306	FisherCenter-PC	Adv Pref FC	Azizi	Azizi phase 3-1.txt	22	290	2	None	4000	White	Scattered	123_star_blue_blue.jpg	124_star_blue_yellow.jpg	25	12	124_star_blue_yellow.jpg	Yellow	1	Incongruent	1316	CE	123_star_blue_blue.jpg 124_star_blue_yellow.jpg	1	N	3.11926
Gorilla	Ape	Yellow	43335	0.374306	FisherCenter-PC	Adv Pref FC	Azizi	Azizi phase 3-1.txt	23	290	2	None	4000	White	Scattered	113_heart_yellow_blue.jpg	114_heart_yellow_yellow.jpg	11	13	113_heart_yellow_blue.jpg	Blue	0	Congruent	1113	CE	113_heart_yellow_blue.jpg 114_heart_yellow_yellow.jpg	1	N	3.0465
Gorilla	Ape	Yellow	43335	0.374306	FisherCenter-PC	Adv Pref FC	Azizi	Azizi phase 3-1.txt	24	290	2	None	4000	White	Scattered	119_square_blue_blue.jpg	120_square_blue_yellow.jpg	15	11	120_square_blue_yellow.jpg	Yellow	1	Incongruent	908	CE	119_square_blue_blue.jpg 120_square_blue_yellow.jpg	1	N	2.95809
Gorilla	Ape	Yellow	43335	0.374306	FisherCenter-PC	Adv Pref FC	Azizi	Azizi phase 3-1.txt	25	290	2	None	4000	White	Scattered	117_shovel_blue.jpg	118_shovel_yellow.jpg	15	14	118_shovel_yellow.jpg	Yellow	1	Control	1152	CE	117_shovel_blue.jpg 118_shovel_yellow.jpg	1	N	3.06145
Gorilla	Ape	Yellow	43335	0.374306	FisherCenter-PC	Adv Pref FC	Azizi	Azizi phase 3-1.txt	26	290	2	None	4000	White	Scattered	105_cross_yellow_blue.jpg	106_cross_yellow_yellow.jpg	15	16	106_cross_yellow_yellow.jpg	Yellow	1	Congruent	2159	CE	105_cross_yellow_blue.jpg 106_cross_yellow_yellow.jpg	1	N	3.33425
Gorilla	Ape	Yellow	43335	0.374306	FisherCenter-PC	Adv Pref FC	Azizi	Azizi phase 3-1.txt	27	290	2	None	4000	White	Scattered	123_star_blue_blue.jpg	124_star_blue_yellow.jpg	11	17	124_star_blue_yellow.jpg	Yellow	1	Incongruent	851	CE	123_star_blue_blue.jpg 124_star_blue_yellow.jpg	1	N	2.92993
Gorilla	Ape	Yellow	43335	0.374306	FisherCenter-PC	Adv Pref FC	Azizi	Azizi phase 3-1.txt	28	290	2	None	4000	White	Scattered	111_heart_blue_blue.jpg	112_heart_blue_yellow.jpg	22	23	111_heart_blue_blue.jpg	Blue	0	Incongruent	2187	CE	111_heart_blue_blue.jpg 112_heart_blue_yellow.jpg	1	N	3.33985
Gorilla	Ape	Yellow	43335	0.374306	FisherCenter-PC	Adv Pref FC	Azizi	Azizi phase 3-1.txt	29	290	2	None	4000	White	Scattered	101_bicycle_blue.jpg	102_bicycle_yellow.jpg	16	24	101_bicycle_blue.jpg	Blue	0	Control	5576	CE	101_bicycle_blue.jpg 102_bicycle_yellow.jpg	1	Y	3.74632
Gorilla	Ape	Yellow	43335	0.374306	FisherCenter-PC	Adv Pref FC	Azizi	Azizi phase 3-1.txt	30	290	2	None	4000	White	Scattered	103_cross_blue_blue.jpg	104_cross_blue_yellow.jpg	19	12	104_cross_blue_yellow.jpg	Yellow	1	Incongruent	1747	CE	103_cross_blue_blue.jpg 104_cross_blue_yellow.jpg	1	N	3.24229
Gorilla	Ape	Yellow	43336	0.370139	FisherCenter-PC	Adv Pref FC	Azizi	Phase 3_1-2.txt	1	290	2	None	4000	White	Scattered	113_heart_yellow_blue.jpg	114_heart_yellow_yellow.jpg	25	14	114_heart_yellow_yellow.jpg	Yellow	1	Congruent	1440	CE	113_heart_yellow_blue.jpg 114_heart_yellow_yellow.jpg	2	N	3.15836
Gorilla	Ape	Yellow	43336	0.370139	FisherCenter-PC	Adv Pref FC	Azizi	Phase 3_1-2.txt	2	290	2	None	4000	White	Scattered	103_cross_blue_blue.jpg	104_cross_blue_yellow.jpg	17	22	104_cross_blue_yellow.jpg	Yellow	1	Incongruent	936	CE	103_cross_blue_blue.jpg 104_cross_blue_yellow.jpg	2	N	2.97128
Gorilla	Ape	Yellow	43336	0.370139	FisherCenter-PC	Adv Pref FC	Azizi	Phase 3_1-2.txt	3	290	2	None	4000	White	Scattered	121_square_yellow_blue.jpg	122_square_yellow_yellow.jpg	16	19	121_square_yellow_blue.jpg	Blue	0	Congruent	879	CE	121_square_yellow_blue.jpg 122_square_yellow_yellow.jpg	2	N	2.94399
Gorilla	Ape	Yellow	43336	0.370139	FisherCenter-PC	Adv Pref FC	Azizi	Phase 3_1-2.txt	4	290	2	None	4000	White	Scattered	117_shovel_blue.jpg	118_shovel_yellow.jpg	19	22	117_shovel_blue.jpg	Blue	0	Control	904	CE	117_shovel_blue.jpg 118_shovel_yellow.jpg	2	N	2.95617
Gorilla	Ape	Yellow	43336	0.370139	FisherCenter-PC	Adv Pref FC	Azizi	Phase 3_1-2.txt	5	290	2	None	4000	White	Scattered	123_star_blue_blue.jpg	124_star_blue_yellow.jpg	20	22	124_star_blue_yellow.jpg	Yellow	1	Incongruent	912	CE	123_star_blue_blue.jpg 124_star_blue_yellow.jpg	2	N	2.95999
Gorilla	Ape	Yellow	43336	0.370139	FisherCenter-PC	Adv Pref FC	Azizi	Phase 3_1-2.txt	6	290	2	None	4000	White	Scattered	109_fork_blue.jpg	110_fork_yellow.jpg	17	22	110_fork_yellow.jpg	Yellow	1	Control	968	CE	109_fork_blue.jpg 110_fork_yellow.jpg	2	N	2.98588
Gorilla	Ape	Yellow	43336	0.370139	FisherCenter-PC	Adv Pref FC	Azizi	Phase 3_1-2.txt	7	290	2	None	4000	White	Scattered	121_square_yellow_blue.jpg	122_square_yellow_yellow.jpg	12	18	121_square_yellow_blue.jpg	Blue	0	Congruent	1153	CE	121_square_yellow_blue.jpg 122_square_yellow_yellow.jpg	2	N	3.06183
Gorilla	Ape	Yellow	43336	0.370139	FisherCenter-PC	Adv Pref FC	Azizi	Phase 3_1-2.txt	8	290	2	None	4000	White	Scattered	111_heart_blue_blue.jpg	112_heart_blue_yellow.jpg	14	18	112_heart_blue_yellow.jpg	Yellow	1	Incongruent	936	CE	111_heart_blue_blue.jpg 112_heart_blue_yellow.jpg	2	N	2.97128
Gorilla	Ape	Yellow	43336	0.370139	FisherCenter-PC	Adv Pref FC	Azizi	Phase 3_1-2.txt	9	290	2	None	4000	White	Scattered	125_star_yellow_blue.jpg	126_star_yellow_yellow.jpg	22	18	125_star_yellow_blue.jpg	Blue	0	Congruent	1124	CE	125_star_yellow_blue.jpg 126_star_yellow_yellow.jpg	2	N	3.05077
Gorilla	Ape	Yellow	43336	0.370139	FisherCenter-PC	Adv Pref FC	Azizi	Phase 3_1-2.txt	10	290	2	None	4000	White	Scattered	107_fidget_spinner_blue.jpg	108_fidget_spinner_yellow.jpg	18	20	107_fidget_spinner_blue.jpg	Blue	0	Control	1036	CE	107_fidget_spinner_blue.jpg 108_fidget_spinner_yellow.jpg	2	N	3.01536
Gorilla	Ape	Yellow	43336	0.370139	FisherCenter-PC	Adv Pref FC	Azizi	Phase 3_1-2.txt	11	290	2	None	4000	White	Scattered	121_square_yellow_blue.jpg	122_square_yellow_yellow.jpg	17	20	121_square_yellow_blue.jpg	Blue	0	Congruent	861	CE	121_square_yellow_blue.jpg 122_square_yellow_yellow.jpg	2	N	2.935
Gorilla	Ape	Yellow	43336	0.370139	FisherCenter-PC	Adv Pref FC	Azizi	Phase 3_1-2.txt	12	290	2	None	4000	White	Scattered	111_heart_blue_blue.jpg	112_heart_blue_yellow.jpg	22	17	112_heart_blue_yellow.jpg	Yellow	1	Incongruent	1437	CE	111_heart_blue_blue.jpg 112_heart_blue_yellow.jpg	2	N	3.15746
Gorilla	Ape	Yellow	43336	0.370139	FisherCenter-PC	Adv Pref FC	Azizi	Phase 3_1-2.txt	13	290	2	None	4000	White	Scattered	119_square_blue_blue.jpg	120_square_blue_yellow.jpg	11	22	120_square_blue_yellow.jpg	Yellow	1	Incongruent	1140	CE	119_square_blue_blue.jpg 120_square_blue_yellow.jpg	2	N	3.0569
Gorilla	Ape	Yellow	43336	0.370139	FisherCenter-PC	Adv Pref FC	Azizi	Phase 3_1-2.txt	14	290	2	None	4000	White	Scattered	113_heart_yellow_blue.jpg	114_heart_yellow_yellow.jpg	18	17	114_heart_yellow_yellow.jpg	Yellow	1	Congruent	973	CE	113_heart_yellow_blue.jpg 114_heart_yellow_yellow.jpg	2	N	2.98811
Gorilla	Ape	Yellow	43336	0.370139	FisherCenter-PC	Adv Pref FC	Azizi	Phase 3_1-2.txt	15	290	2	None	4000	White	Scattered	109_fork_blue.jpg	110_fork_yellow.jpg	24	20	109_fork_blue.jpg	Blue	0	Control	1129	CE	109_fork_blue.jpg 110_fork_yellow.jpg	2	N	3.05269
Gorilla	Ape	Yellow	43336	0.370139	FisherCenter-PC	Adv Pref FC	Azizi	Phase 3_1-2.txt	16	290	2	None	4000	White	Scattered	111_heart_blue_blue.jpg	112_heart_blue_yellow.jpg	19	24	112_heart_blue_yellow.jpg	Yellow	1	Incongruent	812	CE	111_heart_blue_blue.jpg 112_heart_blue_yellow.jpg	2	N	2.90956
Gorilla	Ape	Yellow	43336	0.370139	FisherCenter-PC	Adv Pref FC	Azizi	Phase 3_1-2.txt	17	290	2	None	4000	White	Scattered	103_cross_blue_blue.jpg	104_cross_blue_yellow.jpg	12	14	104_cross_blue_yellow.jpg	Yellow	1	Incongruent	1579	CE	103_cross_blue_blue.jpg 104_cross_blue_yellow.jpg	2	N	3.19838
Gorilla	Ape	Yellow	43336	0.370139	FisherCenter-PC	Adv Pref FC	Azizi	Phase 3_1-2.txt	18	290	2	None	4000	White	Scattered	101_bicycle_blue.jpg	102_bicycle_yellow.jpg	21	12	102_bicycle_yellow.jpg	Yellow	1	Control	2584	CE	101_bicycle_blue.jpg 102_bicycle_yellow.jpg	2	N	3.41229
Gorilla	Ape	Yellow	43336	0.370139	FisherCenter-PC	Adv Pref FC	Azizi	Phase 3_1-2.txt	19	290	2	None	4000	White	Scattered	105_cross_yellow_blue.jpg	106_cross_yellow_yellow.jpg	17	21	106_cross_yellow_yellow.jpg	Yellow	1	Congruent	1316	CE	105_cross_yellow_blue.jpg 106_cross_yellow_yellow.jpg	2	N	3.11926
Gorilla	Ape	Yellow	43336	0.370139	FisherCenter-PC	Adv Pref FC	Azizi	Phase 3_1-2.txt	20	290	2	None	4000	White	Scattered	117_shovel_blue.jpg	118_shovel_yellow.jpg	15	16	118_shovel_yellow.jpg	Yellow	1	Control	1455	CE	117_shovel_blue.jpg 118_shovel_yellow.jpg	2	N	3.16286
Gorilla	Ape	Yellow	43336	0.370139	FisherCenter-PC	Adv Pref FC	Azizi	Phase 3_1-2.txt	21	290	2	None	4000	White	Scattered	125_star_yellow_blue.jpg	126_star_yellow_yellow.jpg	15	17	126_star_yellow_yellow.jpg	Yellow	1	Congruent	6623	CE	125_star_yellow_blue.jpg 126_star_yellow_yellow.jpg	2	Y	3.82105
Gorilla	Ape	Yellow	43336	0.370139	FisherCenter-PC	Adv Pref FC	Azizi	Phase 3_1-2.txt	22	290	2	None	4000	White	Scattered	101_bicycle_blue.jpg	102_bicycle_yellow.jpg	22	16	101_bicycle_blue.jpg	Blue	0	Control	1107	CE	101_bicycle_blue.jpg 102_bicycle_yellow.jpg	2	N	3.04415
Gorilla	Ape	Yellow	43336	0.370139	FisherCenter-PC	Adv Pref FC	Azizi	Phase 3_1-2.txt	23	290	2	None	4000	White	Scattered	113_heart_yellow_blue.jpg	114_heart_yellow_yellow.jpg	23	11	113_heart_yellow_blue.jpg	Blue	0	Congruent	2245	CE	113_heart_yellow_blue.jpg 114_heart_yellow_yellow.jpg	2	N	3.35122
Gorilla	Ape	Yellow	43336	0.370139	FisherCenter-PC	Adv Pref FC	Azizi	Phase 3_1-2.txt	24	290	2	None	4000	White	Scattered	119_square_blue_blue.jpg	120_square_blue_yellow.jpg	21	18	120_square_blue_yellow.jpg	Yellow	1	Incongruent	926	CE	119_square_blue_blue.jpg 120_square_blue_yellow.jpg	2	N	2.96661
Gorilla	Ape	Yellow	43336	0.370139	FisherCenter-PC	Adv Pref FC	Azizi	Phase 3_1-2.txt	25	290	2	None	4000	White	Scattered	115_mug_blue.jpg	116_mug_yellow.jpg	18	12	116_mug_yellow.jpg	Yellow	1	Control	1965	CE	115_mug_blue.jpg 116_mug_yellow.jpg	2	N	3.29336
Gorilla	Ape	Yellow	43336	0.370139	FisherCenter-PC	Adv Pref FC	Azizi	Phase 3_1-2.txt	26	290	2	None	4000	White	Scattered	123_star_blue_blue.jpg	124_star_blue_yellow.jpg	11	13	124_star_blue_yellow.jpg	Yellow	1	Incongruent	1137	CE	123_star_blue_blue.jpg 124_star_blue_yellow.jpg	2	N	3.05576
Gorilla	Ape	Yellow	43336	0.370139	FisherCenter-PC	Adv Pref FC	Azizi	Phase 3_1-2.txt	27	290	2	None	4000	White	Scattered	105_cross_yellow_blue.jpg	106_cross_yellow_yellow.jpg	14	17	106_cross_yellow_yellow.jpg	Yellow	1	Congruent	3956	CE	105_cross_yellow_blue.jpg 106_cross_yellow_yellow.jpg	2	N	3.59726
Gorilla	Ape	Yellow	43336	0.370139	FisherCenter-PC	Adv Pref FC	Azizi	Phase 3_1-2.txt	28	290	2	None	4000	White	Scattered	107_fidget_spinner_blue.jpg	108_fidget_spinner_yellow.jpg	24	25	108_fidget_spinner_yellow.jpg	Yellow	1	Control	1251	CE	107_fidget_spinner_blue.jpg 108_fidget_spinner_yellow.jpg	2	N	3.09726
Gorilla	Ape	Yellow	43336	0.370139	FisherCenter-PC	Adv Pref FC	Azizi	Phase 3_1-2.txt	29	290	2	None	4000	White	Scattered	119_square_blue_blue.jpg	120_square_blue_yellow.jpg	23	11	120_square_blue_yellow.jpg	Yellow	1	Incongruent	1336	CE	119_square_blue_blue.jpg 120_square_blue_yellow.jpg	2	N	3.12581
Gorilla	Ape	Yellow	43336	0.370139	FisherCenter-PC	Adv Pref FC	Azizi	Phase 3_1-2.txt	30	290	2	None	4000	White	Scattered	115_mug_blue.jpg	116_mug_yellow.jpg	15	22	116_mug_yellow.jpg	Yellow	1	Control	1926	CE	115_mug_blue.jpg 116_mug_yellow.jpg	2	N	3.28466
Gorilla	Ape	Yellow	43339	0.576389	FisherCenter-PC	Adv Pref FC	Azizi	Phase 3_1-3.txt	1	290	2	None	4000	White	Scattered	123_star_blue_blue.jpg	124_star_blue_yellow.jpg	23	20	124_star_blue_yellow.jpg	Yellow	1	Incongruent	4403	CE	123_star_blue_blue.jpg 124_star_blue_yellow.jpg	3	Y	3.64375
Gorilla	Ape	Yellow	43339	0.576389	FisherCenter-PC	Adv Pref FC	Azizi	Phase 3_1-3.txt	2	290	2	None	4000	White	Scattered	115_mug_blue.jpg	116_mug_yellow.jpg	22	23	116_mug_yellow.jpg	Yellow	1	Control	1942	CE	115_mug_blue.jpg 116_mug_yellow.jpg	3	N	3.28825
Gorilla	Ape	Yellow	43339	0.576389	FisherCenter-PC	Adv Pref FC	Azizi	Phase 3_1-3.txt	3	290	2	None	4000	White	Scattered	105_cross_yellow_blue.jpg	106_cross_yellow_yellow.jpg	25	19	106_cross_yellow_yellow.jpg	Yellow	1	Congruent	1316	CE	105_cross_yellow_blue.jpg 106_cross_yellow_yellow.jpg	3	N	3.11926
Gorilla	Ape	Yellow	43339	0.576389	FisherCenter-PC	Adv Pref FC	Azizi	Phase 3_1-3.txt	4	290	2	None	4000	White	Scattered	109_fork_blue.jpg	110_fork_yellow.jpg	16	14	110_fork_yellow.jpg	Yellow	1	Control	1518	CE	109_fork_blue.jpg 110_fork_yellow.jpg	3	N	3.18127
Gorilla	Ape	Yellow	43339	0.576389	FisherCenter-PC	Adv Pref FC	Azizi	Phase 3_1-3.txt	5	290	2	None	4000	White	Scattered	123_star_blue_blue.jpg	124_star_blue_yellow.jpg	25	21	124_star_blue_yellow.jpg	Yellow	1	Incongruent	4200	CE	123_star_blue_blue.jpg 124_star_blue_yellow.jpg	3	N	3.62325
Gorilla	Ape	Yellow	43339	0.576389	FisherCenter-PC	Adv Pref FC	Azizi	Phase 3_1-3.txt	6	290	2	None	4000	White	Scattered	113_heart_yellow_blue.jpg	114_heart_yellow_yellow.jpg	12	13	114_heart_yellow_yellow.jpg	Yellow	1	Congruent	1286	CE	113_heart_yellow_blue.jpg 114_heart_yellow_yellow.jpg	3	N	3.10924
Gorilla	Ape	Yellow	43339	0.576389	FisherCenter-PC	Adv Pref FC	Azizi	Phase 3_1-3.txt	7	290	2	None	4000	White	Scattered	117_shovel_blue.jpg	118_shovel_yellow.jpg	12	25	117_shovel_blue.jpg	Blue	0	Control	2015	CE	117_shovel_blue.jpg 118_shovel_yellow.jpg	3	N	3.30428
Gorilla	Ape	Yellow	43339	0.576389	FisherCenter-PC	Adv Pref FC	Azizi	Phase 3_1-3.txt	8	290	2	None	4000	White	Scattered	125_star_yellow_blue.jpg	126_star_yellow_yellow.jpg	14	13	126_star_yellow_yellow.jpg	Yellow	1	Congruent	981	CE	125_star_yellow_blue.jpg 126_star_yellow_yellow.jpg	3	N	2.99167
Gorilla	Ape	Yellow	43339	0.576389	FisherCenter-PC	Adv Pref FC	Azizi	Phase 3_1-3.txt	9	290	2	None	4000	White	Scattered	109_fork_blue.jpg	110_fork_yellow.jpg	17	19	110_fork_yellow.jpg	Yellow	1	Control	972	CE	109_fork_blue.jpg 110_fork_yellow.jpg	3	N	2.98767
Gorilla	Ape	Yellow	43339	0.576389	FisherCenter-PC	Adv Pref FC	Azizi	Phase 3_1-3.txt	10	290	2	None	4000	White	Scattered	113_heart_yellow_blue.jpg	114_heart_yellow_yellow.jpg	17	22	113_heart_yellow_blue.jpg	Blue	0	Congruent	1940	CE	113_heart_yellow_blue.jpg 114_heart_yellow_yellow.jpg	3	N	3.2878
Gorilla	Ape	Yellow	43339	0.576389	FisherCenter-PC	Adv Pref FC	Azizi	Phase 3_1-3.txt	11	290	2	None	4000	White	Scattered	111_heart_blue_blue.jpg	112_heart_blue_yellow.jpg	19	21	112_heart_blue_yellow.jpg	Yellow	1	Incongruent	1529	CE	111_heart_blue_blue.jpg 112_heart_blue_yellow.jpg	3	N	3.18441
Gorilla	Ape	Yellow	43339	0.576389	FisherCenter-PC	Adv Pref FC	Azizi	Phase 3_1-3.txt	12	290	2	None	4000	White	Scattered	119_square_blue_blue.jpg	120_square_blue_yellow.jpg	25	12	120_square_blue_yellow.jpg	Yellow	1	Incongruent	1050	CE	119_square_blue_blue.jpg 120_square_blue_yellow.jpg	3	N	3.02119
Gorilla	Ape	Yellow	43339	0.576389	FisherCenter-PC	Adv Pref FC	Azizi	Phase 3_1-3.txt	13	290	2	None	4000	White	Scattered	105_cross_yellow_blue.jpg	106_cross_yellow_yellow.jpg	25	15	106_cross_yellow_yellow.jpg	Yellow	1	Congruent	1532	CE	105_cross_yellow_blue.jpg 106_cross_yellow_yellow.jpg	3	N	3.18526
Gorilla	Ape	Yellow	43339	0.576389	FisherCenter-PC	Adv Pref FC	Azizi	Phase 3_1-3.txt	14	290	2	None	4000	White	Scattered	101_bicycle_blue.jpg	102_bicycle_yellow.jpg	20	11	102_bicycle_yellow.jpg	Yellow	1	Control	1112	CE	101_bicycle_blue.jpg 102_bicycle_yellow.jpg	3	N	3.0461
Gorilla	Ape	Yellow	43339	0.576389	FisherCenter-PC	Adv Pref FC	Azizi	Phase 3_1-3.txt	15	290	2	None	4000	White	Scattered	119_square_blue_blue.jpg	120_square_blue_yellow.jpg	22	13	120_square_blue_yellow.jpg	Yellow	1	Incongruent	1075	CE	119_square_blue_blue.jpg 120_square_blue_yellow.jpg	3	N	3.03141
Gorilla	Ape	Yellow	43339	0.576389	FisherCenter-PC	Adv Pref FC	Azizi	Phase 3_1-3.txt	16	290	2	None	4000	White	Scattered	105_cross_yellow_blue.jpg	106_cross_yellow_yellow.jpg	19	12	105_cross_yellow_blue.jpg	Blue	0	Congruent	1422	CE	105_cross_yellow_blue.jpg 106_cross_yellow_yellow.jpg	3	N	3.1529
Gorilla	Ape	Yellow	43339	0.576389	FisherCenter-PC	Adv Pref FC	Azizi	Phase 3_1-3.txt	17	290	2	None	4000	White	Scattered	103_cross_blue_blue.jpg	104_cross_blue_yellow.jpg	14	13	104_cross_blue_yellow.jpg	Yellow	1	Incongruent	876	CE	103_cross_blue_blue.jpg 104_cross_blue_yellow.jpg	3	N	2.9425
Gorilla	Ape	Yellow	43339	0.576389	FisherCenter-PC	Adv Pref FC	Azizi	Phase 3_1-3.txt	18	290	2	None	4000	White	Scattered	115_mug_blue.jpg	116_mug_yellow.jpg	17	19	116_mug_yellow.jpg	Yellow	1	Control	1514	CE	115_mug_blue.jpg 116_mug_yellow.jpg	3	N	3.18013
Gorilla	Ape	Yellow	43339	0.576389	FisherCenter-PC	Adv Pref FC	Azizi	Phase 3_1-3.txt	19	290	2	None	4000	White	Scattered	125_star_yellow_blue.jpg	126_star_yellow_yellow.jpg	20	21	126_star_yellow_yellow.jpg	Yellow	1	Congruent	1470	CE	125_star_yellow_blue.jpg 126_star_yellow_yellow.jpg	3	N	3.16732
Gorilla	Ape	Yellow	43339	0.576389	FisherCenter-PC	Adv Pref FC	Azizi	Phase 3_1-3.txt	20	290	2	None	4000	White	Scattered	107_fidget_spinner_blue.jpg	108_fidget_spinner_yellow.jpg	17	16	107_fidget_spinner_blue.jpg	Blue	0	Control	757	CE	107_fidget_spinner_blue.jpg 108_fidget_spinner_yellow.jpg	3	N	2.8791
Gorilla	Ape	Yellow	43339	0.576389	FisherCenter-PC	Adv Pref FC	Azizi	Phase 3_1-3.txt	21	290	2	None	4000	White	Scattered	123_star_blue_blue.jpg	124_star_blue_yellow.jpg	17	22	124_star_blue_yellow.jpg	Yellow	1	Incongruent	1035	CE	123_star_blue_blue.jpg 124_star_blue_yellow.jpg	3	N	3.01494
Gorilla	Ape	Yellow	43339	0.576389	FisherCenter-PC	Adv Pref FC	Azizi	Phase 3_1-3.txt	22	290	2	None	4000	White	Scattered	101_bicycle_blue.jpg	102_bicycle_yellow.jpg	15	12	102_bicycle_yellow.jpg	Yellow	1	Control	3771	CE	101_bicycle_blue.jpg 102_bicycle_yellow.jpg	3	N	3.57646
Gorilla	Ape	Yellow	43339	0.576389	FisherCenter-PC	Adv Pref FC	Azizi	Phase 3_1-3.txt	23	290	2	None	4000	White	Scattered	121_square_yellow_blue.jpg	122_square_yellow_yellow.jpg	13	17	122_square_yellow_yellow.jpg	Yellow	1	Congruent	1080	CE	121_square_yellow_blue.jpg 122_square_yellow_yellow.jpg	3	N	3.03342
Gorilla	Ape	Yellow	43339	0.576389	FisherCenter-PC	Adv Pref FC	Azizi	Phase 3_1-3.txt	24	290	2	None	4000	White	Scattered	111_heart_blue_blue.jpg	112_heart_blue_yellow.jpg	24	19	112_heart_blue_yellow.jpg	Yellow	1	Incongruent	2101	CE	111_heart_blue_blue.jpg 112_heart_blue_yellow.jpg	3	N	3.32243
Gorilla	Ape	Yellow	43339	0.576389	FisherCenter-PC	Adv Pref FC	Azizi	Phase 3_1-3.txt	25	290	2	None	4000	White	Scattered	107_fidget_spinner_blue.jpg	108_fidget_spinner_yellow.jpg	24	23	108_fidget_spinner_yellow.jpg	Yellow	1	Control	1197	CE	107_fidget_spinner_blue.jpg 108_fidget_spinner_yellow.jpg	3	N	3.07809
Gorilla	Ape	Yellow	43339	0.576389	FisherCenter-PC	Adv Pref FC	Azizi	Phase 3_1-3.txt	26	290	2	None	4000	White	Scattered	103_cross_blue_blue.jpg	104_cross_blue_yellow.jpg	16	12	104_cross_blue_yellow.jpg	Yellow	1	Incongruent	1772	CE	103_cross_blue_blue.jpg 104_cross_blue_yellow.jpg	3	N	3.24846
Gorilla	Ape	Yellow	43339	0.576389	FisherCenter-PC	Adv Pref FC	Azizi	Phase 3_1-3.txt	27	290	2	None	4000	White	Scattered	125_star_yellow_blue.jpg	126_star_yellow_yellow.jpg	22	24	126_star_yellow_yellow.jpg	Yellow	1	Congruent	1850	CE	125_star_yellow_blue.jpg 126_star_yellow_yellow.jpg	3	N	3.26717
Gorilla	Ape	Yellow	43339	0.576389	FisherCenter-PC	Adv Pref FC	Azizi	Phase 3_1-3.txt	28	290	2	None	4000	White	Scattered	117_shovel_blue.jpg	118_shovel_yellow.jpg	21	14	118_shovel_yellow.jpg	Yellow	1	Control	957	CE	117_shovel_blue.jpg 118_shovel_yellow.jpg	3	N	2.98091
Gorilla	Ape	Yellow	43339	0.576389	FisherCenter-PC	Adv Pref FC	Azizi	Phase 3_1-3.txt	29	290	2	None	4000	White	Scattered	121_square_yellow_blue.jpg	122_square_yellow_yellow.jpg	15	20	121_square_yellow_blue.jpg	Blue	0	Congruent	1028	CE	121_square_yellow_blue.jpg 122_square_yellow_yellow.jpg	3	N	3.01199
Gorilla	Ape	Yellow	43339	0.576389	FisherCenter-PC	Adv Pref FC	Azizi	Phase 3_1-3.txt	30	290	2	None	4000	White	Scattered	103_cross_blue_blue.jpg	104_cross_blue_yellow.jpg	22	25	104_cross_blue_yellow.jpg	Yellow	1	Incongruent	1353	CE	103_cross_blue_blue.jpg 104_cross_blue_yellow.jpg	3	N	3.1313
Gorilla	Ape	Yellow	43340	0.377778	FisherCenter-PC	Adv Pref FC	Azizi	Phase 3_1-4.txt	1	290	2	None	4000	White	Scattered	119_square_blue_blue.jpg	120_square_blue_yellow.jpg	13	25	119_square_blue_blue.jpg	Blue	0	Incongruent	4297	CE	119_square_blue_blue.jpg 120_square_blue_yellow.jpg	4	Y	3.63317
Gorilla	Ape	Yellow	43340	0.377778	FisherCenter-PC	Adv Pref FC	Azizi	Phase 3_1-4.txt	2	290	2	None	4000	White	Scattered	125_star_yellow_blue.jpg	126_star_yellow_yellow.jpg	21	18	126_star_yellow_yellow.jpg	Yellow	1	congruent	747	CE	125_star_yellow_blue.jpg 126_star_yellow_yellow.jpg	4	N	2.87332
Gorilla	Ape	Yellow	43340	0.377778	FisherCenter-PC	Adv Pref FC	Azizi	Phase 3_1-4.txt	3	290	2	None	4000	White	Scattered	111_heart_blue_blue.jpg	112_heart_blue_yellow.jpg	19	14	111_heart_blue_blue.jpg	Blue	0	Incongruent	1002	CE	111_heart_blue_blue.jpg 112_heart_blue_yellow.jpg	4	N	3.00087
Gorilla	Ape	Yellow	43340	0.377778	FisherCenter-PC	Adv Pref FC	Azizi	Phase 3_1-4.txt	4	290	2	None	4000	White	Scattered	105_cross_yellow_blue.jpg	106_cross_yellow_yellow.jpg	22	24	106_cross_yellow_yellow.jpg	Yellow	1	congruent	1993	CE	105_cross_yellow_blue.jpg 106_cross_yellow_yellow.jpg	4	N	3.29951
Gorilla	Ape	Yellow	43340	0.377778	FisherCenter-PC	Adv Pref FC	Azizi	Phase 3_1-4.txt	5	290	2	None	4000	White	Scattered	115_mug_blue.jpg	116_mug_yellow.jpg	11	18	116_mug_yellow.jpg	Yellow	1	Control	1061	CE	115_mug_blue.jpg 116_mug_yellow.jpg	4	N	3.02572
Gorilla	Ape	Yellow	43340	0.377778	FisherCenter-PC	Adv Pref FC	Azizi	Phase 3_1-4.txt	6	290	2	None	4000	White	Scattered	113_heart_yellow_blue.jpg	114_heart_yellow_yellow.jpg	17	14	113_heart_yellow_blue.jpg	Blue	0	congruent	1998	CE	113_heart_yellow_blue.jpg 114_heart_yellow_yellow.jpg	4	N	3.3006
Gorilla	Ape	Yellow	43340	0.377778	FisherCenter-PC	Adv Pref FC	Azizi	Phase 3_1-4.txt	7	290	2	None	4000	White	Scattered	103_cross_blue_blue.jpg	104_cross_blue_yellow.jpg	22	15	103_cross_blue_blue.jpg	Blue	0	Incongruent	995	CE	103_cross_blue_blue.jpg 104_cross_blue_yellow.jpg	4	N	2.99782
Gorilla	Ape	Yellow	43340	0.377778	FisherCenter-PC	Adv Pref FC	Azizi	Phase 3_1-4.txt	8	290	2	None	4000	White	Scattered	101_bicycle_blue.jpg	102_bicycle_yellow.jpg	14	21	102_bicycle_yellow.jpg	Yellow	1	Control	1156	CE	101_bicycle_blue.jpg 102_bicycle_yellow.jpg	4	N	3.06296
Gorilla	Ape	Yellow	43340	0.377778	FisherCenter-PC	Adv Pref FC	Azizi	Phase 3_1-4.txt	9	290	2	None	4000	White	Scattered	103_cross_blue_blue.jpg	104_cross_blue_yellow.jpg	20	14	104_cross_blue_yellow.jpg	Yellow	1	Incongruent	1043	CE	103_cross_blue_blue.jpg 104_cross_blue_yellow.jpg	4	N	3.01828
Gorilla	Ape	Yellow	43340	0.377778	FisherCenter-PC	Adv Pref FC	Azizi	Phase 3_1-4.txt	10	290	2	None	4000	White	Scattered	109_fork_blue.jpg	110_fork_yellow.jpg	22	21	110_fork_yellow.jpg	Yellow	1	Control	1609	CE	109_fork_blue.jpg 110_fork_yellow.jpg	4	N	3.20656
Gorilla	Ape	Yellow	43340	0.377778	FisherCenter-PC	Adv Pref FC	Azizi	Phase 3_1-4.txt	11	290	2	None	4000	White	Scattered	123_star_blue_blue.jpg	124_star_blue_yellow.jpg	22	23	124_star_blue_yellow.jpg	Yellow	1	Incongruent	1275	CE	123_star_blue_blue.jpg 124_star_blue_yellow.jpg	4	N	3.10551
Gorilla	Ape	Yellow	43340	0.377778	FisherCenter-PC	Adv Pref FC	Azizi	Phase 3_1-4.txt	12	290	2	None	4000	White	Scattered	105_cross_yellow_blue.jpg	106_cross_yellow_yellow.jpg	14	19	106_cross_yellow_yellow.jpg	Yellow	1	congruent	1391	CE	105_cross_yellow_blue.jpg 106_cross_yellow_yellow.jpg	4	N	3.14333
Gorilla	Ape	Yellow	43340	0.377778	FisherCenter-PC	Adv Pref FC	Azizi	Phase 3_1-4.txt	13	290	2	None	4000	White	Scattered	101_bicycle_blue.jpg	102_bicycle_yellow.jpg	15	18	102_bicycle_yellow.jpg	Yellow	1	Control	1129	CE	101_bicycle_blue.jpg 102_bicycle_yellow.jpg	4	N	3.05269
Gorilla	Ape	Yellow	43340	0.377778	FisherCenter-PC	Adv Pref FC	Azizi	Phase 3_1-4.txt	14	290	2	None	4000	White	Scattered	121_square_yellow_blue.jpg	122_square_yellow_yellow.jpg	23	12	121_square_yellow_blue.jpg	Blue	0	congruent	1679	CE	121_square_yellow_blue.jpg 122_square_yellow_yellow.jpg	4	N	3.22505
Gorilla	Ape	Yellow	43340	0.377778	FisherCenter-PC	Adv Pref FC	Azizi	Phase 3_1-4.txt	15	290	2	None	4000	White	Scattered	119_square_blue_blue.jpg	120_square_blue_yellow.jpg	21	18	120_square_blue_yellow.jpg	Yellow	1	Incongruent	716	CE	119_square_blue_blue.jpg 120_square_blue_yellow.jpg	4	N	2.85491
Gorilla	Ape	Yellow	43340	0.377778	FisherCenter-PC	Adv Pref FC	Azizi	Phase 3_1-4.txt	16	290	2	None	4000	White	Scattered	121_square_yellow_blue.jpg	122_square_yellow_yellow.jpg	14	25	122_square_yellow_yellow.jpg	Yellow	1	congruent	1478	CE	121_square_yellow_blue.jpg 122_square_yellow_yellow.jpg	4	N	3.16967
Gorilla	Ape	Yellow	43340	0.377778	FisherCenter-PC	Adv Pref FC	Azizi	Phase 3_1-4.txt	17	290	2	None	4000	White	Scattered	109_fork_blue.jpg	110_fork_yellow.jpg	19	22	110_fork_yellow.jpg	Yellow	1	Control	1223	CE	109_fork_blue.jpg 110_fork_yellow.jpg	4	N	3.08743
Gorilla	Ape	Yellow	43340	0.377778	FisherCenter-PC	Adv Pref FC	Azizi	Phase 3_1-4.txt	18	290	2	None	4000	White	Scattered	111_heart_blue_blue.jpg	112_heart_blue_yellow.jpg	19	24	112_heart_blue_yellow.jpg	Yellow	1	Incongruent	1086	CE	111_heart_blue_blue.jpg 112_heart_blue_yellow.jpg	4	N	3.03583
Gorilla	Ape	Yellow	43340	0.377778	FisherCenter-PC	Adv Pref FC	Azizi	Phase 3_1-4.txt	19	290	2	None	4000	White	Scattered	107_fidget_spinner_blue.jpg	108_fidget_spinner_yellow.jpg	24	19	108_fidget_spinner_yellow.jpg	Yellow	1	Control	1109	CE	107_fidget_spinner_blue.jpg 108_fidget_spinner_yellow.jpg	4	N	3.04493
Gorilla	Ape	Yellow	43340	0.377778	FisherCenter-PC	Adv Pref FC	Azizi	Phase 3_1-4.txt	20	290	2	None	4000	White	Scattered	119_square_blue_blue.jpg	120_square_blue_yellow.jpg	21	24	120_square_blue_yellow.jpg	Yellow	1	Incongruent	1049	CE	119_square_blue_blue.jpg 120_square_blue_yellow.jpg	4	N	3.02078
Gorilla	Ape	Yellow	43340	0.377778	FisherCenter-PC	Adv Pref FC	Azizi	Phase 3_1-4.txt	21	290	2	None	4000	White	Scattered	121_square_yellow_blue.jpg	122_square_yellow_yellow.jpg	25	20	122_square_yellow_yellow.jpg	Yellow	1	congruent	3485	CE	121_square_yellow_blue.jpg 122_square_yellow_yellow.jpg	4	N	3.5422
Gorilla	Ape	Yellow	43340	0.377778	FisherCenter-PC	Adv Pref FC	Azizi	Phase 3_1-4.txt	22	290	2	None	4000	White	Scattered	117_shovel_blue.jpg	118_shovel_yellow.jpg	24	14	118_shovel_yellow.jpg	Yellow	1	Control	3565	CE	117_shovel_blue.jpg 118_shovel_yellow.jpg	4	N	3.55206
Gorilla	Ape	Yellow	43340	0.377778	FisherCenter-PC	Adv Pref FC	Azizi	Phase 3_1-4.txt	23	290	2	None	4000	White	Scattered	113_heart_yellow_blue.jpg	114_heart_yellow_yellow.jpg	19	24	114_heart_yellow_yellow.jpg	Yellow	1	congruent	3607	CE	113_heart_yellow_blue.jpg 114_heart_yellow_yellow.jpg	4	N	3.55715
Gorilla	Ape	Yellow	43340	0.377778	FisherCenter-PC	Adv Pref FC	Azizi	Phase 3_1-4.txt	24	290	2	None	4000	White	Scattered	115_mug_blue.jpg	116_mug_yellow.jpg	16	13	116_mug_yellow.jpg	Yellow	1	Control	1165	CE	115_mug_blue.jpg 116_mug_yellow.jpg	4	N	3.06633
Gorilla	Ape	Yellow	43340	0.377778	FisherCenter-PC	Adv Pref FC	Azizi	Phase 3_1-4.txt	25	290	2	None	4000	White	Scattered	111_heart_blue_blue.jpg	112_heart_blue_yellow.jpg	11	16	112_heart_blue_yellow.jpg	Yellow	1	Incongruent	831	CE	111_heart_blue_blue.jpg 112_heart_blue_yellow.jpg	4	N	2.9196
Gorilla	Ape	Yellow	43340	0.377778	FisherCenter-PC	Adv Pref FC	Azizi	Phase 3_1-4.txt	26	290	2	None	4000	White	Scattered	125_star_yellow_blue.jpg	126_star_yellow_yellow.jpg	15	16	126_star_yellow_yellow.jpg	Yellow	1	congruent	1094	CE	125_star_yellow_blue.jpg 126_star_yellow_yellow.jpg	4	N	3.03902
Gorilla	Ape	Yellow	43340	0.377778	FisherCenter-PC	Adv Pref FC	Azizi	Phase 3_1-4.txt	27	290	2	None	4000	White	Scattered	117_shovel_blue.jpg	118_shovel_yellow.jpg	12	11	117_shovel_blue.jpg	Blue	0	Control	816	CE	117_shovel_blue.jpg 118_shovel_yellow.jpg	4	N	2.91169
Gorilla	Ape	Yellow	43340	0.377778	FisherCenter-PC	Adv Pref FC	Azizi	Phase 3_1-4.txt	28	290	2	None	4000	White	Scattered	113_heart_yellow_blue.jpg	114_heart_yellow_yellow.jpg	18	15	114_heart_yellow_yellow.jpg	Yellow	1	congruent	1202	CE	113_heart_yellow_blue.jpg 114_heart_yellow_yellow.jpg	4	N	3.0799
Gorilla	Ape	Yellow	43340	0.377778	FisherCenter-PC	Adv Pref FC	Azizi	Phase 3_1-4.txt	29	290	2	None	4000	White	Scattered	107_fidget_spinner_blue.jpg	108_fidget_spinner_yellow.jpg	20	18	108_fidget_spinner_yellow.jpg	Yellow	1	Control	823	CE	107_fidget_spinner_blue.jpg 108_fidget_spinner_yellow.jpg	4	N	2.9154
Gorilla	Ape	Yellow	43340	0.377778	FisherCenter-PC	Adv Pref FC	Azizi	Phase 3_1-4.txt	30	290	2	None	4000	White	Scattered	123_star_blue_blue.jpg	124_star_blue_yellow.jpg	16	22	124_star_blue_yellow.jpg	Yellow	1	Incongruent	909	CE	123_star_blue_blue.jpg 124_star_blue_yellow.jpg	4	N	2.95856
Gorilla	Ape	Yellow	43341	0.36875	FisherCenter-PC	Adv Pref FC	Azizi	Phase 3_1-1.txt	1	290	2	None	4000	White	Scattered	115_mug_blue.jpg	116_mug_yellow.jpg	11	12	116_mug_yellow.jpg	Yellow	1	Control	1386	CE	115_mug_blue.jpg 116_mug_yellow.jpg	5	N	3.14176
Gorilla	Ape	Yellow	43341	0.36875	FisherCenter-PC	Adv Pref FC	Azizi	Phase 3_1-1.txt	2	290	2	None	4000	White	Scattered	125_star_yellow_blue.jpg	126_star_yellow_yellow.jpg	14	16	126_star_yellow_yellow.jpg	Yellow	1	congruent	2115	CE	125_star_yellow_blue.jpg 126_star_yellow_yellow.jpg	5	N	3.32531
Gorilla	Ape	Yellow	43341	0.36875	FisherCenter-PC	Adv Pref FC	Azizi	Phase 3_1-1.txt	3	290	2	None	4000	White	Scattered	109_fork_blue.jpg	110_fork_yellow.jpg	12	23	110_fork_yellow.jpg	Yellow	1	Control	1146	CE	109_fork_blue.jpg 110_fork_yellow.jpg	5	N	3.05918
Gorilla	Ape	Yellow	43341	0.36875	FisherCenter-PC	Adv Pref FC	Azizi	Phase 3_1-1.txt	4	290	2	None	4000	White	Scattered	123_star_blue_blue.jpg	124_star_blue_yellow.jpg	13	22	124_star_blue_yellow.jpg	Yellow	1	Incongruent	1026	CE	123_star_blue_blue.jpg 124_star_blue_yellow.jpg	5	N	3.01115
Gorilla	Ape	Yellow	43341	0.36875	FisherCenter-PC	Adv Pref FC	Azizi	Phase 3_1-1.txt	5	290	2	None	4000	White	Scattered	105_cross_yellow_blue.jpg	106_cross_yellow_yellow.jpg	23	12	105_cross_yellow_blue.jpg	Blue	0	Congruent	3360	CE	105_cross_yellow_blue.jpg 106_cross_yellow_yellow.jpg	5	N	3.52634
Gorilla	Ape	Yellow	43341	0.36875	FisherCenter-PC	Adv Pref FC	Azizi	Phase 3_1-1.txt	6	290	2	None	4000	White	Scattered	125_star_yellow_blue.jpg	126_star_yellow_yellow.jpg	21	22	126_star_yellow_yellow.jpg	Yellow	1	congruent	1267	CE	125_star_yellow_blue.jpg 126_star_yellow_yellow.jpg	5	N	3.10278
Gorilla	Ape	Yellow	43341	0.36875	FisherCenter-PC	Adv Pref FC	Azizi	Phase 3_1-1.txt	7	290	2	None	4000	White	Scattered	115_mug_blue.jpg	116_mug_yellow.jpg	16	22	116_mug_yellow.jpg	Yellow	1	Control	2564	CE	115_mug_blue.jpg 116_mug_yellow.jpg	5	N	3.40892
Gorilla	Ape	Yellow	43341	0.36875	FisherCenter-PC	Adv Pref FC	Azizi	Phase 3_1-1.txt	8	290	2	None	4000	White	Scattered	111_heart_blue_blue.jpg	112_heart_blue_yellow.jpg	15	12	112_heart_blue_yellow.jpg	Yellow	1	Incongruent	1236	CE	111_heart_blue_blue.jpg 112_heart_blue_yellow.jpg	5	N	3.09202
Gorilla	Ape	Yellow	43341	0.36875	FisherCenter-PC	Adv Pref FC	Azizi	Phase 3_1-1.txt	9	290	2	None	4000	White	Scattered	121_square_yellow_blue.jpg	122_square_yellow_yellow.jpg	20	24	122_square_yellow_yellow.jpg	Yellow	1	congruent	1570	CE	121_square_yellow_blue.jpg 122_square_yellow_yellow.jpg	5	N	3.1959
Gorilla	Ape	Yellow	43341	0.36875	FisherCenter-PC	Adv Pref FC	Azizi	Phase 3_1-1.txt	10	290	2	None	4000	White	Scattered	101_bicycle_blue.JPG	102_bicycle_yellow.JPG	24	12	101_bicycle_blue.JPG	Blue	0	Control	494	CE	101_bicycle_blue.JPG 102_bicycle_yellow.JPG	5	N	2.69373
Gorilla	Ape	Yellow	43341	0.36875	FisherCenter-PC	Adv Pref FC	Azizi	Phase 3_1-1.txt	11	290	2	None	4000	White	Scattered	105_cross_yellow_blue.jpg	106_cross_yellow_yellow.jpg	21	24	105_cross_yellow_blue.jpg	Blue	0	Congruent	1845	CE	105_cross_yellow_blue.jpg 106_cross_yellow_yellow.jpg	5	N	3.266
Gorilla	Ape	Yellow	43341	0.36875	FisherCenter-PC	Adv Pref FC	Azizi	Phase 3_1-1.txt	12	290	2	None	4000	White	Scattered	107_fidget_spinner_blue.jpg	108_fidget_spinner_yellow.jpg	11	19	108_fidget_spinner_yellow.jpg	Yellow	1	Control	1423	CE	107_fidget_spinner_blue.jpg 108_fidget_spinner_yellow.jpg	5	N	3.1532
Gorilla	Ape	Yellow	43341	0.36875	FisherCenter-PC	Adv Pref FC	Azizi	Phase 3_1-1.txt	13	290	2	None	4000	White	Scattered	125_star_yellow_blue.jpg	126_star_yellow_yellow.jpg	19	24	126_star_yellow_yellow.jpg	Yellow	1	congruent	6073	CE	125_star_yellow_blue.jpg 126_star_yellow_yellow.jpg	5	Y	3.7834
Gorilla	Ape	Yellow	43341	0.36875	FisherCenter-PC	Adv Pref FC	Azizi	Phase 3_1-1.txt	14	290	2	None	4000	White	Scattered	103_cross_blue_blue.JPG	104_cross_blue_yellow.JPG	19	24	104_cross_blue_yellow.JPG	Yellow	1	Incongruent	2611	CE	103_cross_blue_blue.JPG 104_cross_blue_yellow.JPG	5	N	3.41681
Gorilla	Ape	Yellow	43341	0.36875	FisherCenter-PC	Adv Pref FC	Azizi	Phase 3_1-1.txt	15	290	2	None	4000	White	Scattered	109_fork_blue.jpg	110_fork_yellow.jpg	12	16	110_fork_yellow.jpg	Yellow	1	Control	1108	CE	109_fork_blue.jpg 110_fork_yellow.jpg	5	N	3.04454
Gorilla	Ape	Yellow	43341	0.36875	FisherCenter-PC	Adv Pref FC	Azizi	Phase 3_1-1.txt	16	290	2	None	4000	White	Scattered	121_square_yellow_blue.jpg	122_square_yellow_yellow.jpg	13	14	121_square_yellow_blue.jpg	Blue	0	Congruent	1142	CE	121_square_yellow_blue.jpg 122_square_yellow_yellow.jpg	5	N	3.05767
Gorilla	Ape	Yellow	43341	0.36875	FisherCenter-PC	Adv Pref FC	Azizi	Phase 3_1-1.txt	17	290	2	None	4000	White	Scattered	119_square_blue_blue.jpg	120_square_blue_yellow.jpg	11	12	120_square_blue_yellow.jpg	Yellow	1	Incongruent	1236	CE	119_square_blue_blue.jpg 120_square_blue_yellow.jpg	5	N	3.09202
Gorilla	Ape	Yellow	43341	0.36875	FisherCenter-PC	Adv Pref FC	Azizi	Phase 3_1-1.txt	18	290	2	None	4000	White	Scattered	113_heart_yellow_blue.jpg	114_heart_yellow_yellow.jpg	20	14	113_heart_yellow_blue.jpg	Blue	0	Congruent	5096	CE	113_heart_yellow_blue.jpg 114_heart_yellow_yellow.jpg	5	Y	3.70723
Gorilla	Ape	Yellow	43341	0.36875	FisherCenter-PC	Adv Pref FC	Azizi	Phase 3_1-1.txt	19	290	2	None	4000	White	Scattered	117_shovel_blue.jpg	118_shovel_yellow.jpg	14	25	117_shovel_blue.jpg	Blue	0	Control	1865	CE	117_shovel_blue.jpg 118_shovel_yellow.jpg	5	N	3.27068
Gorilla	Ape	Yellow	43341	0.36875	FisherCenter-PC	Adv Pref FC	Azizi	Phase 3_1-1.txt	20	290	2	None	4000	White	Scattered	103_cross_blue_blue.JPG	104_cross_blue_yellow.JPG	14	19	104_cross_blue_yellow.JPG	Yellow	1	Incongruent	1698	CE	103_cross_blue_blue.JPG 104_cross_blue_yellow.JPG	5	N	3.22994
Gorilla	Ape	Yellow	43341	0.36875	FisherCenter-PC	Adv Pref FC	Azizi	Phase 3_1-1.txt	21	290	2	None	4000	White	Scattered	107_fidget_spinner_blue.jpg	108_fidget_spinner_yellow.jpg	11	22	108_fidget_spinner_yellow.jpg	Yellow	1	Control	1447	CE	107_fidget_spinner_blue.jpg 108_fidget_spinner_yellow.jpg	5	N	3.16047
Gorilla	Ape	Yellow	43341	0.36875	FisherCenter-PC	Adv Pref FC	Azizi	Phase 3_1-1.txt	22	290	2	None	4000	White	Scattered	123_star_blue_blue.jpg	124_star_blue_yellow.jpg	12	14	124_star_blue_yellow.jpg	Yellow	1	Incongruent	1453	CE	123_star_blue_blue.jpg 124_star_blue_yellow.jpg	5	N	3.16227
Gorilla	Ape	Yellow	43341	0.36875	FisherCenter-PC	Adv Pref FC	Azizi	Phase 3_1-1.txt	23	290	2	None	4000	White	Scattered	113_heart_yellow_blue.jpg	114_heart_yellow_yellow.jpg	14	16	113_heart_yellow_blue.jpg	Blue	0	Congruent	1670	CE	113_heart_yellow_blue.jpg 114_heart_yellow_yellow.jpg	5	N	3.22272
Gorilla	Ape	Yellow	43341	0.36875	FisherCenter-PC	Adv Pref FC	Azizi	Phase 3_1-1.txt	24	290	2	None	4000	White	Scattered	119_square_blue_blue.jpg	120_square_blue_yellow.jpg	20	23	120_square_blue_yellow.jpg	Yellow	1	Incongruent	1579	CE	119_square_blue_blue.jpg 120_square_blue_yellow.jpg	5	N	3.19838
Gorilla	Ape	Yellow	43341	0.36875	FisherCenter-PC	Adv Pref FC	Azizi	Phase 3_1-1.txt	25	290	2	None	4000	White	Scattered	117_shovel_blue.jpg	118_shovel_yellow.jpg	14	11	118_shovel_yellow.jpg	Yellow	1	Control	1370	CE	117_shovel_blue.jpg 118_shovel_yellow.jpg	5	N	3.13672
Gorilla	Ape	Yellow	43341	0.36875	FisherCenter-PC	Adv Pref FC	Azizi	Phase 3_1-1.txt	26	290	2	None	4000	White	Scattered	105_cross_yellow_blue.jpg	106_cross_yellow_yellow.jpg	13	11	105_cross_yellow_blue.jpg	Blue	0	Congruent	1658	CE	105_cross_yellow_blue.jpg 106_cross_yellow_yellow.jpg	5	N	3.21958
Gorilla	Ape	Yellow	43341	0.36875	FisherCenter-PC	Adv Pref FC	Azizi	Phase 3_1-1.txt	27	290	2	None	4000	White	Scattered	123_star_blue_blue.jpg	124_star_blue_yellow.jpg	18	25	123_star_blue_blue.jpg	Blue	0	Incongruent	1329	CE	123_star_blue_blue.jpg 124_star_blue_yellow.jpg	5	N	3.12352
Gorilla	Ape	Yellow	43341	0.36875	FisherCenter-PC	Adv Pref FC	Azizi	Phase 3_1-1.txt	28	290	2	None	4000	White	Scattered	111_heart_blue_blue.jpg	112_heart_blue_yellow.jpg	18	16	112_heart_blue_yellow.jpg	Yellow	1	Incongruent	1405	CE	111_heart_blue_blue.jpg 112_heart_blue_yellow.jpg	5	N	3.14768
Gorilla	Ape	Yellow	43341	0.36875	FisherCenter-PC	Adv Pref FC	Azizi	Phase 3_1-1.txt	29	290	2	None	4000	White	Scattered	101_bicycle_blue.JPG	102_bicycle_yellow.JPG	12	23	102_bicycle_yellow.JPG	Yellow	1	Control	1405	CE	101_bicycle_blue.JPG 102_bicycle_yellow.JPG	5	N	3.14768
Gorilla	Ape	Yellow	43341	0.36875	FisherCenter-PC	Adv Pref FC	Azizi	Phase 3_1-1.txt	30	290	2	None	4000	White	Scattered	103_cross_blue_blue.JPG	104_cross_blue_yellow.JPG	21	19	104_cross_blue_yellow.JPG	Yellow	1	Incongruent	4474	CE	103_cross_blue_blue.JPG 104_cross_blue_yellow.JPG	5	Y	3.6507
Gorilla	Ape	Yellow	43342	0.379861	FisherCenter-PC	Adv Pref FC	Azizi	Phase 3_1-2.txt	1	290	2	None	4000	White	Scattered	113_heart_yellow_blue.jpg	114_heart_yellow_yellow.jpg	16	23	114_heart_yellow_yellow.jpg	Yellow	1	Congruent	1380	CE	113_heart_yellow_blue.jpg 114_heart_yellow_yellow.jpg	6	N	3.13988
Gorilla	Ape	Yellow	43342	0.379861	FisherCenter-PC	Adv Pref FC	Azizi	Phase 3_1-2.txt	2	290	2	None	4000	White	Scattered	103_cross_blue_blue.JPG	104_cross_blue_yellow.JPG	23	24	104_cross_blue_yellow.JPG	Yellow	1	Incongruent	3189	CE	103_cross_blue_blue.JPG 104_cross_blue_yellow.JPG	6	N	3.50365
Gorilla	Ape	Yellow	43342	0.379861	FisherCenter-PC	Adv Pref FC	Azizi	Phase 3_1-2.txt	3	290	2	None	4000	White	Scattered	121_square_yellow_blue.jpg	122_square_yellow_yellow.jpg	11	25	122_square_yellow_yellow.jpg	Yellow	1	Congruent	4768	CE	121_square_yellow_blue.jpg 122_square_yellow_yellow.jpg	6	Y	3.67834
Gorilla	Ape	Yellow	43342	0.379861	FisherCenter-PC	Adv Pref FC	Azizi	Phase 3_1-2.txt	4	290	2	None	4000	White	Scattered	117_shovel_blue.jpg	118_shovel_yellow.jpg	22	16	117_shovel_blue.jpg	Blue	0	Control	1739	CE	117_shovel_blue.jpg 118_shovel_yellow.jpg	6	N	3.2403
Gorilla	Ape	Yellow	43342	0.379861	FisherCenter-PC	Adv Pref FC	Azizi	Phase 3_1-2.txt	5	290	2	None	4000	White	Scattered	123_star_blue_blue.jpg	124_star_blue_yellow.jpg	11	18	124_star_blue_yellow.jpg	Yellow	1	Incongruent	922	CE	123_star_blue_blue.jpg 124_star_blue_yellow.jpg	6	N	2.96473
Gorilla	Ape	Yellow	43342	0.379861	FisherCenter-PC	Adv Pref FC	Azizi	Phase 3_1-2.txt	6	290	2	None	4000	White	Scattered	109_fork_blue.jpg	110_fork_yellow.jpg	11	19	110_fork_yellow.jpg	Yellow	1	Control	3672	CE	109_fork_blue.jpg 110_fork_yellow.jpg	6	N	3.5649
Gorilla	Ape	Yellow	43342	0.379861	FisherCenter-PC	Adv Pref FC	Azizi	Phase 3_1-2.txt	7	290	2	None	4000	White	Scattered	121_square_yellow_blue.jpg	122_square_yellow_yellow.jpg	13	17	122_square_yellow_yellow.jpg	Yellow	1	Congruent	4035	CE	121_square_yellow_blue.jpg 122_square_yellow_yellow.jpg	6	N	3.60584
Gorilla	Ape	Yellow	43342	0.379861	FisherCenter-PC	Adv Pref FC	Azizi	Phase 3_1-2.txt	8	290	2	None	4000	White	Scattered	111_heart_blue_blue.jpg	112_heart_blue_yellow.jpg	12	15	112_heart_blue_yellow.jpg	Yellow	1	Incongruent	1474	CE	111_heart_blue_blue.jpg 112_heart_blue_yellow.jpg	6	N	3.1685
Gorilla	Ape	Yellow	43342	0.379861	FisherCenter-PC	Adv Pref FC	Azizi	Phase 3_1-2.txt	9	290	2	None	4000	White	Scattered	125_star_yellow_blue.jpg	126_star_yellow_yellow.jpg	15	14	126_star_yellow_yellow.jpg	Yellow	1	Congruent	1141	CE	125_star_yellow_blue.jpg 126_star_yellow_yellow.jpg	6	N	3.05729
Gorilla	Ape	Yellow	43342	0.379861	FisherCenter-PC	Adv Pref FC	Azizi	Phase 3_1-2.txt	10	290	2	None	4000	White	Scattered	107_fidget_spinner_blue.jpg	108_fidget_spinner_yellow.jpg	14	22	108_fidget_spinner_yellow.jpg	Yellow	1	Control	1299	CE	107_fidget_spinner_blue.jpg 108_fidget_spinner_yellow.jpg	6	N	3.11361
Gorilla	Ape	Yellow	43342	0.379861	FisherCenter-PC	Adv Pref FC	Azizi	Phase 3_1-2.txt	11	290	2	None	4000	White	Scattered	121_square_yellow_blue.jpg	122_square_yellow_yellow.jpg	18	22	122_square_yellow_yellow.jpg	Yellow	1	Congruent	1052	CE	121_square_yellow_blue.jpg 122_square_yellow_yellow.jpg	6	N	3.02202
Gorilla	Ape	Yellow	43342	0.379861	FisherCenter-PC	Adv Pref FC	Azizi	Phase 3_1-2.txt	12	290	2	None	4000	White	Scattered	111_heart_blue_blue.jpg	112_heart_blue_yellow.jpg	22	12	112_heart_blue_yellow.jpg	Yellow	1	Incongruent	1456	CE	111_heart_blue_blue.jpg 112_heart_blue_yellow.jpg	6	N	3.16316
Gorilla	Ape	Yellow	43342	0.379861	FisherCenter-PC	Adv Pref FC	Azizi	Phase 3_1-2.txt	13	290	2	None	4000	White	Scattered	119_square_blue_blue.jpg	120_square_blue_yellow.jpg	13	12	120_square_blue_yellow.jpg	Yellow	1	Incongruent	892	CE	119_square_blue_blue.jpg 120_square_blue_yellow.jpg	6	N	2.95036
Gorilla	Ape	Yellow	43342	0.379861	FisherCenter-PC	Adv Pref FC	Azizi	Phase 3_1-2.txt	14	290	2	None	4000	White	Scattered	113_heart_yellow_blue.jpg	114_heart_yellow_yellow.jpg	25	24	113_heart_yellow_blue.jpg	Blue	0	Congruent	1351	CE	113_heart_yellow_blue.jpg 114_heart_yellow_yellow.jpg	6	N	3.13066
Gorilla	Ape	Yellow	43342	0.379861	FisherCenter-PC	Adv Pref FC	Azizi	Phase 3_1-2.txt	15	290	2	None	4000	White	Scattered	109_fork_blue.jpg	110_fork_yellow.jpg	23	21	109_fork_blue.jpg	Blue	0	Control	911	CE	109_fork_blue.jpg 110_fork_yellow.jpg	6	N	2.95952
Gorilla	Ape	Yellow	43342	0.379861	FisherCenter-PC	Adv Pref FC	Azizi	Phase 3_1-2.txt	16	290	2	None	4000	White	Scattered	111_heart_blue_blue.jpg	112_heart_blue_yellow.jpg	21	11	112_heart_blue_yellow.jpg	Yellow	1	Incongruent	1572	CE	111_heart_blue_blue.jpg 112_heart_blue_yellow.jpg	6	N	3.19645
Gorilla	Ape	Yellow	43342	0.379861	FisherCenter-PC	Adv Pref FC	Azizi	Phase 3_1-2.txt	17	290	2	None	4000	White	Scattered	103_cross_blue_blue.JPG	104_cross_blue_yellow.JPG	23	24	104_cross_blue_yellow.JPG	Yellow	1	Incongruent	1080	CE	103_cross_blue_blue.JPG 104_cross_blue_yellow.JPG	6	N	3.03342
Gorilla	Ape	Yellow	43342	0.379861	FisherCenter-PC	Adv Pref FC	Azizi	Phase 3_1-2.txt	18	290	2	None	4000	White	Scattered	101_bicycle_blue.JPG	102_bicycle_yellow.JPG	13	15	102_bicycle_yellow.JPG	Yellow	1	Control	1332	CE	101_bicycle_blue.JPG 102_bicycle_yellow.JPG	6	N	3.1245
Gorilla	Ape	Yellow	43342	0.379861	FisherCenter-PC	Adv Pref FC	Azizi	Phase 3_1-2.txt	19	290	2	None	4000	White	Scattered	105_cross_yellow_blue.jpg	106_cross_yellow_yellow.jpg	24	20	105_cross_yellow_blue.jpg	Blue	0	Congruent	2192	CE	105_cross_yellow_blue.jpg 106_cross_yellow_yellow.jpg	6	N	3.34084
Gorilla	Ape	Yellow	43342	0.379861	FisherCenter-PC	Adv Pref FC	Azizi	Phase 3_1-2.txt	20	290	2	None	4000	White	Scattered	117_shovel_blue.jpg	118_shovel_yellow.jpg	17	13	118_shovel_yellow.jpg	Yellow	1	Control	975	CE	117_shovel_blue.jpg 118_shovel_yellow.jpg	6	N	2.989
Gorilla	Ape	Yellow	43342	0.379861	FisherCenter-PC	Adv Pref FC	Azizi	Phase 3_1-2.txt	21	290	2	None	4000	White	Scattered	125_star_yellow_blue.jpg	126_star_yellow_yellow.jpg	15	18	126_star_yellow_yellow.jpg	Yellow	1	Congruent	1161	CE	125_star_yellow_blue.jpg 126_star_yellow_yellow.jpg	6	N	3.06483
Gorilla	Ape	Yellow	43342	0.379861	FisherCenter-PC	Adv Pref FC	Azizi	Phase 3_1-2.txt	22	290	2	None	4000	White	Scattered	101_bicycle_blue.JPG	102_bicycle_yellow.JPG	18	14	102_bicycle_yellow.JPG	Yellow	1	Control	1318	CE	101_bicycle_blue.JPG 102_bicycle_yellow.JPG	6	N	3.11992
Gorilla	Ape	Yellow	43342	0.379861	FisherCenter-PC	Adv Pref FC	Azizi	Phase 3_1-2.txt	23	290	2	None	4000	White	Scattered	113_heart_yellow_blue.jpg	114_heart_yellow_yellow.jpg	25	18	114_heart_yellow_yellow.jpg	Yellow	1	Congruent	1085	CE	113_heart_yellow_blue.jpg 114_heart_yellow_yellow.jpg	6	N	3.03543
Gorilla	Ape	Yellow	43342	0.379861	FisherCenter-PC	Adv Pref FC	Azizi	Phase 3_1-2.txt	24	290	2	None	4000	White	Scattered	119_square_blue_blue.jpg	120_square_blue_yellow.jpg	13	15	120_square_blue_yellow.jpg	Yellow	1	Incongruent	1721	CE	119_square_blue_blue.jpg 120_square_blue_yellow.jpg	6	N	3.23578
Gorilla	Ape	Yellow	43342	0.379861	FisherCenter-PC	Adv Pref FC	Azizi	Phase 3_1-2.txt	25	290	2	None	4000	White	Scattered	115_mug_blue.jpg	116_mug_yellow.jpg	21	16	115_mug_blue.jpg	Blue	0	Control	971	CE	115_mug_blue.jpg 116_mug_yellow.jpg	6	N	2.98722
Gorilla	Ape	Yellow	43342	0.379861	FisherCenter-PC	Adv Pref FC	Azizi	Phase 3_1-2.txt	26	290	2	None	4000	White	Scattered	123_star_blue_blue.jpg	124_star_blue_yellow.jpg	12	20	124_star_blue_yellow.jpg	Yellow	1	Incongruent	1027	CE	123_star_blue_blue.jpg 124_star_blue_yellow.jpg	6	N	3.01157
Gorilla	Ape	Yellow	43342	0.379861	FisherCenter-PC	Adv Pref FC	Azizi	Phase 3_1-2.txt	27	290	2	None	4000	White	Scattered	105_cross_yellow_blue.jpg	106_cross_yellow_yellow.jpg	24	11	105_cross_yellow_blue.jpg	Blue	0	Congruent	1564	CE	105_cross_yellow_blue.jpg 106_cross_yellow_yellow.jpg	6	N	3.19424
Gorilla	Ape	Yellow	43342	0.379861	FisherCenter-PC	Adv Pref FC	Azizi	Phase 3_1-2.txt	28	290	2	None	4000	White	Scattered	107_fidget_spinner_blue.jpg	108_fidget_spinner_yellow.jpg	15	11	108_fidget_spinner_yellow.jpg	Yellow	1	Control	1066	CE	107_fidget_spinner_blue.jpg 108_fidget_spinner_yellow.jpg	6	N	3.02776
Gorilla	Ape	Yellow	43342	0.379861	FisherCenter-PC	Adv Pref FC	Azizi	Phase 3_1-2.txt	29	290	2	None	4000	White	Scattered	119_square_blue_blue.jpg	120_square_blue_yellow.jpg	12	25	120_square_blue_yellow.jpg	Yellow	1	Incongruent	1249	CE	119_square_blue_blue.jpg 120_square_blue_yellow.jpg	6	N	3.09656
Gorilla	Ape	Yellow	43342	0.379861	FisherCenter-PC	Adv Pref FC	Azizi	Phase 3_1-2.txt	30	290	2	None	4000	White	Scattered	115_mug_blue.jpg	116_mug_yellow.jpg	23	14	116_mug_yellow.jpg	Yellow	1	Control	1272	CE	115_mug_blue.jpg 116_mug_yellow.jpg	6	N	3.10449
Gorilla	Ape	Yellow	43362	0.478472	FisherCenter-PC	Adv Pref FC	Azizi	Phase 3_1-3.txt	1	290	2	None	4000	White	Scattered	123_star_blue_blue.jpg	124_star_blue_yellow.jpg	23	24	124_star_blue_yellow.jpg	Yellow	1	Incongruent	2346	CE	123_star_blue_blue.jpg 124_star_blue_yellow.jpg	7	N	3.37033
Gorilla	Ape	Yellow	43362	0.478472	FisherCenter-PC	Adv Pref FC	Azizi	Phase 3_1-3.txt	2	290	2	None	4000	White	Scattered	115_mug_blue.jpg	116_mug_yellow.jpg	11	22	116_mug_yellow.jpg	Yellow	1	Control	1352	CE	115_mug_blue.jpg 116_mug_yellow.jpg	7	N	3.13098
Gorilla	Ape	Yellow	43362	0.478472	FisherCenter-PC	Adv Pref FC	Azizi	Phase 3_1-3.txt	3	290	2	None	4000	White	Scattered	105_cross_yellow_blue.jpg	106_cross_yellow_yellow.jpg	21	13	106_cross_yellow_yellow.jpg	Yellow	1	Congruent	891	CE	105_cross_yellow_blue.jpg 106_cross_yellow_yellow.jpg	7	N	2.94988
Gorilla	Ape	Yellow	43362	0.478472	FisherCenter-PC	Adv Pref FC	Azizi	Phase 3_1-3.txt	4	290	2	None	4000	White	Scattered	109_fork_blue.jpg	110_fork_yellow.jpg	13	19	110_fork_yellow.jpg	Yellow	1	Control	924	CE	109_fork_blue.jpg 110_fork_yellow.jpg	7	N	2.96567
Gorilla	Ape	Yellow	43362	0.478472	FisherCenter-PC	Adv Pref FC	Azizi	Phase 3_1-3.txt	5	290	2	None	4000	White	Scattered	123_star_blue_blue.jpg	124_star_blue_yellow.jpg	25	14	124_star_blue_yellow.jpg	Yellow	1	Incongruent	916	CE	123_star_blue_blue.jpg 124_star_blue_yellow.jpg	7	N	2.9619
Gorilla	Ape	Yellow	43362	0.478472	FisherCenter-PC	Adv Pref FC	Azizi	Phase 3_1-3.txt	6	290	2	None	4000	White	Scattered	113_heart_yellow_blue.jpg	114_heart_yellow_yellow.jpg	13	25	113_heart_yellow_blue.jpg	Blue	0	Congruent	1387	CE	113_heart_yellow_blue.jpg 114_heart_yellow_yellow.jpg	7	N	3.14208
Gorilla	Ape	Yellow	43362	0.478472	FisherCenter-PC	Adv Pref FC	Azizi	Phase 3_1-3.txt	7	290	2	None	4000	White	Scattered	117_shovel_blue.jpg	118_shovel_yellow.jpg	14	25	118_shovel_yellow.jpg	Yellow	1	Control	1133	CE	117_shovel_blue.jpg 118_shovel_yellow.jpg	7	N	3.05423
Gorilla	Ape	Yellow	43362	0.478472	FisherCenter-PC	Adv Pref FC	Azizi	Phase 3_1-3.txt	8	290	2	None	4000	White	Scattered	125_star_yellow_blue.jpg	126_star_yellow_yellow.jpg	25	15	126_star_yellow_yellow.jpg	Yellow	1	Congruent	2410	CE	125_star_yellow_blue.jpg 126_star_yellow_yellow.jpg	7	N	3.38202
Gorilla	Ape	Yellow	43362	0.478472	FisherCenter-PC	Adv Pref FC	Azizi	Phase 3_1-3.txt	9	290	2	None	4000	White	Scattered	109_fork_blue.jpg	110_fork_yellow.jpg	12	13	110_fork_yellow.jpg	Yellow	1	Control	6642	CE	109_fork_blue.jpg 110_fork_yellow.jpg	7	Y	3.8223
Gorilla	Ape	Yellow	43362	0.478472	FisherCenter-PC	Adv Pref FC	Azizi	Phase 3_1-3.txt	10	290	2	None	4000	White	Scattered	113_heart_yellow_blue.jpg	114_heart_yellow_yellow.jpg	16	17	114_heart_yellow_yellow.jpg	Yellow	1	Congruent	1085	CE	113_heart_yellow_blue.jpg 114_heart_yellow_yellow.jpg	7	N	3.03543
Gorilla	Ape	Yellow	43362	0.478472	FisherCenter-PC	Adv Pref FC	Azizi	Phase 3_1-3.txt	11	290	2	None	4000	White	Scattered	111_heart_blue_blue.jpg	112_heart_blue_yellow.jpg	17	25	112_heart_blue_yellow.jpg	Yellow	1	Incongruent	1675	CE	111_heart_blue_blue.jpg 112_heart_blue_yellow.jpg	7	N	3.22401
Gorilla	Ape	Yellow	43362	0.478472	FisherCenter-PC	Adv Pref FC	Azizi	Phase 3_1-3.txt	12	290	2	None	4000	White	Scattered	119_square_blue_blue.jpg	120_square_blue_yellow.jpg	19	24	120_square_blue_yellow.jpg	Yellow	1	Incongruent	832	CE	119_square_blue_blue.jpg 120_square_blue_yellow.jpg	7	N	2.92012
Gorilla	Ape	Yellow	43362	0.478472	FisherCenter-PC	Adv Pref FC	Azizi	Phase 3_1-3.txt	13	290	2	None	4000	White	Scattered	105_cross_yellow_blue.jpg	106_cross_yellow_yellow.jpg	19	14	105_cross_yellow_blue.jpg	Blue	0	Congruent	1597	CE	105_cross_yellow_blue.jpg 106_cross_yellow_yellow.jpg	7	N	3.2033
Gorilla	Ape	Yellow	43362	0.478472	FisherCenter-PC	Adv Pref FC	Azizi	Phase 3_1-3.txt	14	290	2	None	4000	White	Scattered	101_bicycle_blue.JPG	102_bicycle_yellow.JPG	21	14	102_bicycle_yellow.JPG	Yellow	1	Control	1259	CE	101_bicycle_blue.JPG 102_bicycle_yellow.JPG	7	N	3.10003
Gorilla	Ape	Yellow	43362	0.478472	FisherCenter-PC	Adv Pref FC	Azizi	Phase 3_1-3.txt	15	290	2	None	4000	White	Scattered	119_square_blue_blue.jpg	120_square_blue_yellow.jpg	23	17	120_square_blue_yellow.jpg	Yellow	1	Incongruent	2014	CE	119_square_blue_blue.jpg 120_square_blue_yellow.jpg	7	N	3.30406
Gorilla	Ape	Yellow	43362	0.478472	FisherCenter-PC	Adv Pref FC	Azizi	Phase 3_1-3.txt	16	290	2	None	4000	White	Scattered	105_cross_yellow_blue.jpg	106_cross_yellow_yellow.jpg	16	25	105_cross_yellow_blue.jpg	Blue	0	Congruent	1327	CE	105_cross_yellow_blue.jpg 106_cross_yellow_yellow.jpg	7	N	3.12287
Gorilla	Ape	Yellow	43362	0.478472	FisherCenter-PC	Adv Pref FC	Azizi	Phase 3_1-3.txt	17	290	2	None	4000	White	Scattered	103_cross_blue_blue.JPG	104_cross_blue_yellow.JPG	18	23	104_cross_blue_yellow.JPG	Yellow	1	Incongruent	894	CE	103_cross_blue_blue.JPG 104_cross_blue_yellow.JPG	7	N	2.95134
Gorilla	Ape	Yellow	43362	0.478472	FisherCenter-PC	Adv Pref FC	Azizi	Phase 3_1-3.txt	18	290	2	None	4000	White	Scattered	115_mug_blue.jpg	116_mug_yellow.jpg	12	20	116_mug_yellow.jpg	Yellow	1	Control	1178	CE	115_mug_blue.jpg 116_mug_yellow.jpg	7	N	3.07115
Gorilla	Ape	Yellow	43362	0.478472	FisherCenter-PC	Adv Pref FC	Azizi	Phase 3_1-3.txt	19	290	2	None	4000	White	Scattered	125_star_yellow_blue.jpg	126_star_yellow_yellow.jpg	13	20	126_star_yellow_yellow.jpg	Yellow	1	Congruent	1651	CE	125_star_yellow_blue.jpg 126_star_yellow_yellow.jpg	7	N	3.21775
Gorilla	Ape	Yellow	43362	0.478472	FisherCenter-PC	Adv Pref FC	Azizi	Phase 3_1-3.txt	20	290	2	None	4000	White	Scattered	107_fidget_spinner_blue.jpg	108_fidget_spinner_yellow.jpg	12	16	108_fidget_spinner_yellow.jpg	Yellow	1	Control	2047	CE	107_fidget_spinner_blue.jpg 108_fidget_spinner_yellow.jpg	7	N	3.31112
Gorilla	Ape	Yellow	43362	0.478472	FisherCenter-PC	Adv Pref FC	Azizi	Phase 3_1-3.txt	21	290	2	None	4000	White	Scattered	123_star_blue_blue.jpg	124_star_blue_yellow.jpg	22	17	124_star_blue_yellow.jpg	Yellow	1	Incongruent	1598	CE	123_star_blue_blue.jpg 124_star_blue_yellow.jpg	7	N	3.20358
Gorilla	Ape	Yellow	43362	0.478472	FisherCenter-PC	Adv Pref FC	Azizi	Phase 3_1-3.txt	22	290	2	None	4000	White	Scattered	101_bicycle_blue.JPG	102_bicycle_yellow.JPG	12	20	102_bicycle_yellow.JPG	Yellow	1	Control	1016	CE	101_bicycle_blue.JPG 102_bicycle_yellow.JPG	7	N	3.00689
Gorilla	Ape	Yellow	43362	0.478472	FisherCenter-PC	Adv Pref FC	Azizi	Phase 3_1-3.txt	23	290	2	None	4000	White	Scattered	121_square_yellow_blue.jpg	122_square_yellow_yellow.jpg	21	11	122_square_yellow_yellow.jpg	Yellow	1	Congruent	1497	CE	121_square_yellow_blue.jpg 122_square_yellow_yellow.jpg	7	N	3.17522
Gorilla	Ape	Yellow	43362	0.478472	FisherCenter-PC	Adv Pref FC	Azizi	Phase 3_1-3.txt	24	290	2	None	4000	White	Scattered	111_heart_blue_blue.jpg	112_heart_blue_yellow.jpg	19	11	112_heart_blue_yellow.jpg	Yellow	1	Incongruent	1174	CE	111_heart_blue_blue.jpg 112_heart_blue_yellow.jpg	7	N	3.06967
Gorilla	Ape	Yellow	43362	0.478472	FisherCenter-PC	Adv Pref FC	Azizi	Phase 3_1-3.txt	25	290	2	None	4000	White	Scattered	107_fidget_spinner_blue.jpg	108_fidget_spinner_yellow.jpg	14	25	108_fidget_spinner_yellow.jpg	Yellow	1	Control	1396	CE	107_fidget_spinner_blue.jpg 108_fidget_spinner_yellow.jpg	7	N	3.14489
Gorilla	Ape	Yellow	43362	0.478472	FisherCenter-PC	Adv Pref FC	Azizi	Phase 3_1-3.txt	26	290	2	None	4000	White	Scattered	103_cross_blue_blue.JPG	104_cross_blue_yellow.JPG	25	11	104_cross_blue_yellow.JPG	Yellow	1	Incongruent	3359	CE	103_cross_blue_blue.JPG 104_cross_blue_yellow.JPG	7	N	3.52621
Gorilla	Ape	Yellow	43362	0.478472	FisherCenter-PC	Adv Pref FC	Azizi	Phase 3_1-3.txt	27	290	2	None	4000	White	Scattered	125_star_yellow_blue.jpg	126_star_yellow_yellow.jpg	13	17	126_star_yellow_yellow.jpg	Yellow	1	Congruent	3118	CE	125_star_yellow_blue.jpg 126_star_yellow_yellow.jpg	7	N	3.49388
Gorilla	Ape	Yellow	43362	0.478472	FisherCenter-PC	Adv Pref FC	Azizi	Phase 3_1-3.txt	28	290	2	None	4000	White	Scattered	117_shovel_blue.jpg	118_shovel_yellow.jpg	18	15	118_shovel_yellow.jpg	Yellow	1	Control	1034	CE	117_shovel_blue.jpg 118_shovel_yellow.jpg	7	N	3.01452
Gorilla	Ape	Yellow	43362	0.478472	FisherCenter-PC	Adv Pref FC	Azizi	Phase 3_1-3.txt	29	290	2	None	4000	White	Scattered	121_square_yellow_blue.jpg	122_square_yellow_yellow.jpg	14	13	121_square_yellow_blue.jpg	Blue	0	Congruent	1037	CE	121_square_yellow_blue.jpg 122_square_yellow_yellow.jpg	7	N	3.01578
Gorilla	Ape	Yellow	43362	0.478472	FisherCenter-PC	Adv Pref FC	Azizi	Phase 3_1-3.txt	30	290	2	None	4000	White	Scattered	103_cross_blue_blue.JPG	104_cross_blue_yellow.JPG	14	16	104_cross_blue_yellow.JPG	Yellow	1	Incongruent	890	CE	103_cross_blue_blue.JPG 104_cross_blue_yellow.JPG	7	N	2.94939
Gorilla	Ape	Yellow	43363	0.41875	FisherCenter-PC	Adv Pref FC	Azizi	Phase 3_1-4.txt	1	290	2	None	4000	White	Scattered	119_square_blue_blue.jpg	120_square_blue_yellow.jpg	11	17	120_square_blue_yellow.jpg	Yellow	1	Incongruent	1671	CE	119_square_blue_blue.jpg 120_square_blue_yellow.jpg	8	N	3.22298
Gorilla	Ape	Yellow	43363	0.41875	FisherCenter-PC	Adv Pref FC	Azizi	Phase 3_1-4.txt	2	290	2	None	4000	White	Scattered	125_star_yellow_blue.jpg	126_star_yellow_yellow.jpg	21	24	126_star_yellow_yellow.jpg	Yellow	1	Congruent	2321	CE	125_star_yellow_blue.jpg 126_star_yellow_yellow.jpg	8	N	3.36568
Gorilla	Ape	Yellow	43363	0.41875	FisherCenter-PC	Adv Pref FC	Azizi	Phase 3_1-4.txt	3	290	2	None	4000	White	Scattered	111_heart_blue_blue.jpg	112_heart_blue_yellow.jpg	15	25	112_heart_blue_yellow.jpg	Yellow	1	Incongruent	4868	CE	111_heart_blue_blue.jpg 112_heart_blue_yellow.jpg	8	Y	3.68735
Gorilla	Ape	Yellow	43363	0.41875	FisherCenter-PC	Adv Pref FC	Azizi	Phase 3_1-4.txt	4	290	2	None	4000	White	Scattered	105_cross_yellow_blue.jpg	106_cross_yellow_yellow.jpg	17	12	105_cross_yellow_blue.jpg	Blue	0	Congruent	1532	CE	105_cross_yellow_blue.jpg 106_cross_yellow_yellow.jpg	8	N	3.18526
Gorilla	Ape	Yellow	43363	0.41875	FisherCenter-PC	Adv Pref FC	Azizi	Phase 3_1-4.txt	5	290	2	None	4000	White	Scattered	115_mug_blue.jpg	116_mug_yellow.jpg	17	21	115_mug_blue.jpg	Blue	0	Control	839	CE	115_mug_blue.jpg 116_mug_yellow.jpg	8	N	2.92376
Gorilla	Ape	Yellow	43363	0.41875	FisherCenter-PC	Adv Pref FC	Azizi	Phase 3_1-4.txt	6	290	2	None	4000	White	Scattered	113_heart_yellow_blue.jpg	114_heart_yellow_yellow.jpg	19	17	113_heart_yellow_blue.jpg	Blue	0	Congruent	69	CE	113_heart_yellow_blue.jpg 114_heart_yellow_yellow.jpg	8	N	1.83885
Gorilla	Ape	Yellow	43363	0.41875	FisherCenter-PC	Adv Pref FC	Azizi	Phase 3_1-4.txt	7	290	2	None	4000	White	Scattered	103_cross_blue_blue.JPG	104_cross_blue_yellow.JPG	24	23	103_cross_blue_blue.JPG	Blue	0	Incongruent	1421	CE	103_cross_blue_blue.JPG 104_cross_blue_yellow.JPG	8	N	3.15259
Gorilla	Ape	Yellow	43363	0.41875	FisherCenter-PC	Adv Pref FC	Azizi	Phase 3_1-4.txt	8	290	2	None	4000	White	Scattered	101_bicycle_blue.JPG	102_bicycle_yellow.JPG	22	13	102_bicycle_yellow.JPG	Yellow	1	Control	926	CE	101_bicycle_blue.JPG 102_bicycle_yellow.JPG	8	N	2.96661
Gorilla	Ape	Yellow	43363	0.41875	FisherCenter-PC	Adv Pref FC	Azizi	Phase 3_1-4.txt	9	290	2	None	4000	White	Scattered	103_cross_blue_blue.JPG	104_cross_blue_yellow.JPG	20	17	104_cross_blue_yellow.JPG	Yellow	1	Incongruent	2562	CE	103_cross_blue_blue.JPG 104_cross_blue_yellow.JPG	8	N	3.40858
Gorilla	Ape	Yellow	43363	0.41875	FisherCenter-PC	Adv Pref FC	Azizi	Phase 3_1-4.txt	10	290	2	None	4000	White	Scattered	109_fork_blue.jpg	110_fork_yellow.jpg	23	11	110_fork_yellow.jpg	Yellow	1	Control	1525	CE	109_fork_blue.jpg 110_fork_yellow.jpg	8	N	3.18327
Gorilla	Ape	Yellow	43363	0.41875	FisherCenter-PC	Adv Pref FC	Azizi	Phase 3_1-4.txt	11	290	2	None	4000	White	Scattered	123_star_blue_blue.jpg	124_star_blue_yellow.jpg	12	25	124_star_blue_yellow.jpg	Yellow	1	Incongruent	3920	CE	123_star_blue_blue.jpg 124_star_blue_yellow.jpg	8	N	3.59329
Gorilla	Ape	Yellow	43363	0.41875	FisherCenter-PC	Adv Pref FC	Azizi	Phase 3_1-4.txt	12	290	2	None	4000	White	Scattered	105_cross_yellow_blue.jpg	106_cross_yellow_yellow.jpg	21	15	106_cross_yellow_yellow.jpg	Yellow	1	Congruent	1214	CE	105_cross_yellow_blue.jpg 106_cross_yellow_yellow.jpg	8	N	3.08422
Gorilla	Ape	Yellow	43363	0.41875	FisherCenter-PC	Adv Pref FC	Azizi	Phase 3_1-4.txt	13	290	2	None	4000	White	Scattered	101_bicycle_blue.JPG	102_bicycle_yellow.JPG	14	19	102_bicycle_yellow.JPG	Yellow	1	Control	907	CE	101_bicycle_blue.JPG 102_bicycle_yellow.JPG	8	N	2.95761
Gorilla	Ape	Yellow	43363	0.41875	FisherCenter-PC	Adv Pref FC	Azizi	Phase 3_1-4.txt	14	290	2	None	4000	White	Scattered	121_square_yellow_blue.jpg	122_square_yellow_yellow.jpg	19	22	121_square_yellow_blue.jpg	Blue	0	Congruent	1084	CE	121_square_yellow_blue.jpg 122_square_yellow_yellow.jpg	8	N	3.03503
Gorilla	Ape	Yellow	43363	0.41875	FisherCenter-PC	Adv Pref FC	Azizi	Phase 3_1-4.txt	15	290	2	None	4000	White	Scattered	119_square_blue_blue.jpg	120_square_blue_yellow.jpg	21	23	120_square_blue_yellow.jpg	Yellow	1	Incongruent	941	CE	119_square_blue_blue.jpg 120_square_blue_yellow.jpg	8	N	2.97359
Gorilla	Ape	Yellow	43363	0.41875	FisherCenter-PC	Adv Pref FC	Azizi	Phase 3_1-4.txt	16	290	2	None	4000	White	Scattered	121_square_yellow_blue.jpg	122_square_yellow_yellow.jpg	22	12	122_square_yellow_yellow.jpg	Yellow	1	Congruent	1472	CE	121_square_yellow_blue.jpg 122_square_yellow_yellow.jpg	8	N	3.16791
Gorilla	Ape	Yellow	43363	0.41875	FisherCenter-PC	Adv Pref FC	Azizi	Phase 3_1-4.txt	17	290	2	None	4000	White	Scattered	109_fork_blue.jpg	110_fork_yellow.jpg	13	23	110_fork_yellow.jpg	Yellow	1	Control	1300	CE	109_fork_blue.jpg 110_fork_yellow.jpg	8	N	3.11394
Gorilla	Ape	Yellow	43363	0.41875	FisherCenter-PC	Adv Pref FC	Azizi	Phase 3_1-4.txt	18	290	2	None	4000	White	Scattered	111_heart_blue_blue.jpg	112_heart_blue_yellow.jpg	21	17	112_heart_blue_yellow.jpg	Yellow	1	Incongruent	1478	CE	111_heart_blue_blue.jpg 112_heart_blue_yellow.jpg	8	N	3.16967
Gorilla	Ape	Yellow	43363	0.41875	FisherCenter-PC	Adv Pref FC	Azizi	Phase 3_1-4.txt	19	290	2	None	4000	White	Scattered	107_fidget_spinner_blue.jpg	108_fidget_spinner_yellow.jpg	13	20	107_fidget_spinner_blue.jpg	Blue	0	Control	2613	CE	107_fidget_spinner_blue.jpg 108_fidget_spinner_yellow.jpg	8	N	3.41714
Gorilla	Ape	Yellow	43363	0.41875	FisherCenter-PC	Adv Pref FC	Azizi	Phase 3_1-4.txt	20	290	2	None	4000	White	Scattered	119_square_blue_blue.jpg	120_square_blue_yellow.jpg	11	13	120_square_blue_yellow.jpg	Yellow	1	Incongruent	922	CE	119_square_blue_blue.jpg 120_square_blue_yellow.jpg	8	N	2.96473
Gorilla	Ape	Yellow	43363	0.41875	FisherCenter-PC	Adv Pref FC	Azizi	Phase 3_1-4.txt	21	290	2	None	4000	White	Scattered	121_square_yellow_blue.jpg	122_square_yellow_yellow.jpg	25	21	121_square_yellow_blue.jpg	Blue	0	Congruent	1100	CE	121_square_yellow_blue.jpg 122_square_yellow_yellow.jpg	8	N	3.04139
Gorilla	Ape	Yellow	43363	0.41875	FisherCenter-PC	Adv Pref FC	Azizi	Phase 3_1-4.txt	22	290	2	None	4000	White	Scattered	117_shovel_blue.jpg	118_shovel_yellow.jpg	17	18	118_shovel_yellow.jpg	Yellow	1	Control	1240	CE	117_shovel_blue.jpg 118_shovel_yellow.jpg	8	N	3.09342
Gorilla	Ape	Yellow	43363	0.41875	FisherCenter-PC	Adv Pref FC	Azizi	Phase 3_1-4.txt	23	290	2	None	4000	White	Scattered	113_heart_yellow_blue.jpg	114_heart_yellow_yellow.jpg	23	20	114_heart_yellow_yellow.jpg	Yellow	1	Congruent	1090	CE	113_heart_yellow_blue.jpg 114_heart_yellow_yellow.jpg	8	N	3.03743
Gorilla	Ape	Yellow	43363	0.41875	FisherCenter-PC	Adv Pref FC	Azizi	Phase 3_1-4.txt	24	290	2	None	4000	White	Scattered	115_mug_blue.jpg	116_mug_yellow.jpg	11	13	116_mug_yellow.jpg	Yellow	1	Control	1858	CE	115_mug_blue.jpg 116_mug_yellow.jpg	8	N	3.26905
Gorilla	Ape	Yellow	43363	0.41875	FisherCenter-PC	Adv Pref FC	Azizi	Phase 3_1-4.txt	25	290	2	None	4000	White	Scattered	111_heart_blue_blue.jpg	112_heart_blue_yellow.jpg	11	21	112_heart_blue_yellow.jpg	Yellow	1	Incongruent	1519	CE	111_heart_blue_blue.jpg 112_heart_blue_yellow.jpg	8	N	3.18156
Gorilla	Ape	Yellow	43363	0.41875	FisherCenter-PC	Adv Pref FC	Azizi	Phase 3_1-4.txt	26	290	2	None	4000	White	Scattered	125_star_yellow_blue.jpg	126_star_yellow_yellow.jpg	17	13	125_star_yellow_blue.jpg	Blue	0	Congruent	977	CE	125_star_yellow_blue.jpg 126_star_yellow_yellow.jpg	8	N	2.98989
Gorilla	Ape	Yellow	43363	0.41875	FisherCenter-PC	Adv Pref FC	Azizi	Phase 3_1-4.txt	27	290	2	None	4000	White	Scattered	117_shovel_blue.jpg	118_shovel_yellow.jpg	17	11	117_shovel_blue.jpg	Blue	0	Control	727	CE	117_shovel_blue.jpg 118_shovel_yellow.jpg	8	N	2.86153
Gorilla	Ape	Yellow	43363	0.41875	FisherCenter-PC	Adv Pref FC	Azizi	Phase 3_1-4.txt	28	290	2	None	4000	White	Scattered	113_heart_yellow_blue.jpg	114_heart_yellow_yellow.jpg	20	17	114_heart_yellow_yellow.jpg	Yellow	1	Congruent	1543	CE	113_heart_yellow_blue.jpg 114_heart_yellow_yellow.jpg	8	N	3.18837
Gorilla	Ape	Yellow	43363	0.41875	FisherCenter-PC	Adv Pref FC	Azizi	Phase 3_1-4.txt	29	290	2	None	4000	White	Scattered	107_fidget_spinner_blue.jpg	108_fidget_spinner_yellow.jpg	13	14	108_fidget_spinner_yellow.jpg	Yellow	1	Control	1033	CE	107_fidget_spinner_blue.jpg 108_fidget_spinner_yellow.jpg	8	N	3.0141
Gorilla	Ape	Yellow	43363	0.41875	FisherCenter-PC	Adv Pref FC	Azizi	Phase 3_1-4.txt	30	290	2	None	4000	White	Scattered	123_star_blue_blue.jpg	124_star_blue_yellow.jpg	19	20	123_star_blue_blue.jpg	Blue	0	Incongruent	1570	CE	123_star_blue_blue.jpg 124_star_blue_yellow.jpg	8	N	3.1959
Gorilla	Ape	Blue	43382	0.564583	FisherCenter-PC	Adv Pref FC	Kwan	Phase 3_2-1.txt	1	290	2	None	3000	White	Scattered	113_heart_yellow_blue.jpg	114_heart_yellow_yellow.jpg	17	16	113_heart_yellow_blue.jpg	Blue	1	Incongruent	1258	CE	113_heart_yellow_blue.jpg 114_heart_yellow_yellow.jpg	1	N	3.09968
Gorilla	Ape	Blue	43382	0.564583	FisherCenter-PC	Adv Pref FC	Kwan	Phase 3_2-1.txt	2	290	2	None	3000	White	Scattered	103_cross_blue_blue.JPG	104_cross_blue_yellow.JPG	18	14	103_cross_blue_blue.JPG	Blue	1	Congruent	2514	CE	103_cross_blue_blue.JPG 104_cross_blue_yellow.JPG	1	N	3.40037
Gorilla	Ape	Blue	43382	0.564583	FisherCenter-PC	Adv Pref FC	Kwan	Phase 3_2-1.txt	3	290	2	None	3000	White	Scattered	121_square_yellow_blue.jpg	122_square_yellow_yellow.jpg	14	17	121_square_yellow_blue.jpg	Blue	1	Incongruent	1233	CE	121_square_yellow_blue.jpg 122_square_yellow_yellow.jpg	1	N	3.09096
Gorilla	Ape	Blue	43382	0.564583	FisherCenter-PC	Adv Pref FC	Kwan	Phase 3_2-1.txt	4	290	2	None	3000	White	Scattered	117_shovel_blue.jpg	118_shovel_yellow.jpg	23	11	118_shovel_yellow.jpg	Yellow	0	Control	1193	CE	117_shovel_blue.jpg 118_shovel_yellow.jpg	1	N	3.07664
Gorilla	Ape	Blue	43382	0.564583	FisherCenter-PC	Adv Pref FC	Kwan	Phase 3_2-1.txt	5	290	2	None	3000	White	Scattered	123_star_blue_blue.jpg	124_star_blue_yellow.jpg	22	11	123_star_blue_blue.jpg	Blue	1	Congruent	2006	CE	123_star_blue_blue.jpg 124_star_blue_yellow.jpg	1	N	3.30233
Gorilla	Ape	Blue	43382	0.564583	FisherCenter-PC	Adv Pref FC	Kwan	Phase 3_2-1.txt	6	290	2	None	3000	White	Scattered	109_fork_blue.jpg	110_fork_yellow.jpg	20	22	109_fork_blue.jpg	Blue	1	Control	1032	CE	109_fork_blue.jpg 110_fork_yellow.jpg	1	N	3.01368
Gorilla	Ape	Blue	43382	0.564583	FisherCenter-PC	Adv Pref FC	Kwan	Phase 3_2-1.txt	7	290	2	None	3000	White	Scattered	121_square_yellow_blue.jpg	122_square_yellow_yellow.jpg	19	17	122_square_yellow_yellow.jpg	Yellow	0	Incongruent	1075	CE	121_square_yellow_blue.jpg 122_square_yellow_yellow.jpg	1	N	3.03141
Gorilla	Ape	Blue	43382	0.564583	FisherCenter-PC	Adv Pref FC	Kwan	Phase 3_2-1.txt	8	290	2	None	3000	White	Scattered	111_heart_blue_blue.jpg	112_heart_blue_yellow.jpg	23	13	111_heart_blue_blue.jpg	Blue	1	Congruent	1145	CE	111_heart_blue_blue.jpg 112_heart_blue_yellow.jpg	1	N	3.05881
Gorilla	Ape	Blue	43382	0.564583	FisherCenter-PC	Adv Pref FC	Kwan	Phase 3_2-1.txt	9	290	2	None	3000	White	Scattered	125_star_yellow_blue.jpg	126_star_yellow_yellow.jpg	22	23	125_star_yellow_blue.jpg	Blue	1	Incongruent	1395	CE	125_star_yellow_blue.jpg 126_star_yellow_yellow.jpg	1	N	3.14457
Gorilla	Ape	Blue	43382	0.564583	FisherCenter-PC	Adv Pref FC	Kwan	Phase 3_2-1.txt	10	290	2	None	3000	White	Scattered	107_fidget_spinner_blue.jpg	108_fidget_spinner_yellow.jpg	15	22	107_fidget_spinner_blue.jpg	Blue	1	Control	6308	CE	107_fidget_spinner_blue.jpg 108_fidget_spinner_yellow.jpg	1	Y	3.79989
Gorilla	Ape	Blue	43382	0.564583	FisherCenter-PC	Adv Pref FC	Kwan	Phase 3_2-1.txt	11	290	2	None	3000	White	Scattered	121_square_yellow_blue.jpg	122_square_yellow_yellow.jpg	22	12	121_square_yellow_blue.jpg	Blue	1	Incongruent	1272	CE	121_square_yellow_blue.jpg 122_square_yellow_yellow.jpg	1	N	3.10449
Gorilla	Ape	Blue	43382	0.564583	FisherCenter-PC	Adv Pref FC	Kwan	Phase 3_2-1.txt	12	290	2	None	3000	White	Scattered	111_heart_blue_blue.jpg	112_heart_blue_yellow.jpg	24	23	112_heart_blue_yellow.jpg	Yellow	0	Congruent	1942	CE	111_heart_blue_blue.jpg 112_heart_blue_yellow.jpg	1	N	3.28825
Gorilla	Ape	Blue	43382	0.564583	FisherCenter-PC	Adv Pref FC	Kwan	Phase 3_2-1.txt	13	290	2	None	3000	White	Scattered	119_square_blue_blue.jpg	120_square_blue_yellow.jpg	16	17	120_square_blue_yellow.jpg	Yellow	0	Congruent	1189	CE	119_square_blue_blue.jpg 120_square_blue_yellow.jpg	1	N	3.07518
Gorilla	Ape	Blue	43382	0.564583	FisherCenter-PC	Adv Pref FC	Kwan	Phase 3_2-1.txt	14	290	2	None	3000	White	Scattered	113_heart_yellow_blue.jpg	114_heart_yellow_yellow.jpg	25	12	113_heart_yellow_blue.jpg	Blue	1	Incongruent	3217	CE	113_heart_yellow_blue.jpg 114_heart_yellow_yellow.jpg	1	N	3.50745
Gorilla	Ape	Blue	43382	0.564583	FisherCenter-PC	Adv Pref FC	Kwan	Phase 3_2-1.txt	15	290	2	None	3000	White	Scattered	109_fork_blue.jpg	110_fork_yellow.jpg	16	17	110_fork_yellow.jpg	Yellow	0	Control	1143	CE	109_fork_blue.jpg 110_fork_yellow.jpg	1	N	3.05805
Gorilla	Ape	Blue	43382	0.564583	FisherCenter-PC	Adv Pref FC	Kwan	Phase 3_2-1.txt	16	290	2	None	3000	White	Scattered	111_heart_blue_blue.jpg	112_heart_blue_yellow.jpg	14	18	112_heart_blue_yellow.jpg	Yellow	0	Congruent	880	CE	111_heart_blue_blue.jpg 112_heart_blue_yellow.jpg	1	N	2.94448
Gorilla	Ape	Blue	43382	0.564583	FisherCenter-PC	Adv Pref FC	Kwan	Phase 3_2-1.txt	17	290	2	None	3000	White	Scattered	103_cross_blue_blue.JPG	104_cross_blue_yellow.JPG	16	23	104_cross_blue_yellow.JPG	Yellow	0	Congruent	1313	CE	103_cross_blue_blue.JPG 104_cross_blue_yellow.JPG	1	N	3.11826
Gorilla	Ape	Blue	43382	0.564583	FisherCenter-PC	Adv Pref FC	Kwan	Phase 3_2-1.txt	18	290	2	None	3000	White	Scattered	101_bicycle_blue.JPG	102_bicycle_yellow.JPG	21	12	102_bicycle_yellow.JPG	Yellow	0	Control	1699	CE	101_bicycle_blue.JPG 102_bicycle_yellow.JPG	1	N	3.23019
Gorilla	Ape	Blue	43382	0.564583	FisherCenter-PC	Adv Pref FC	Kwan	Phase 3_2-1.txt	19	290	2	None	3000	White	Scattered	105_cross_yellow_blue.jpg	106_cross_yellow_yellow.jpg	12	19	105_cross_yellow_blue.jpg	Blue	1	Incongruent	1823	CE	105_cross_yellow_blue.jpg 106_cross_yellow_yellow.jpg	1	N	3.26079
Gorilla	Ape	Blue	43382	0.564583	FisherCenter-PC	Adv Pref FC	Kwan	Phase 3_2-1.txt	20	290	2	None	3000	White	Scattered	117_shovel_blue.jpg	118_shovel_yellow.jpg	22	23	118_shovel_yellow.jpg	Yellow	0	Control	1555	CE	117_shovel_blue.jpg 118_shovel_yellow.jpg	1	N	3.19173
Gorilla	Ape	Blue	43382	0.564583	FisherCenter-PC	Adv Pref FC	Kwan	Phase 3_2-1.txt	21	290	2	None	3000	White	Scattered	125_star_yellow_blue.jpg	126_star_yellow_yellow.jpg	15	24	125_star_yellow_blue.jpg	Blue	1	Incongruent	2609	CE	125_star_yellow_blue.jpg 126_star_yellow_yellow.jpg	1	N	3.41647
Gorilla	Ape	Blue	43382	0.564583	FisherCenter-PC	Adv Pref FC	Kwan	Phase 3_2-1.txt	22	290	2	None	3000	White	Scattered	101_bicycle_blue.JPG	102_bicycle_yellow.JPG	23	25	101_bicycle_blue.JPG	Blue	1	Control	1207	CE	101_bicycle_blue.JPG 102_bicycle_yellow.JPG	1	N	3.08171
Gorilla	Ape	Blue	43382	0.564583	FisherCenter-PC	Adv Pref FC	Kwan	Phase 3_2-1.txt	23	290	2	None	3000	White	Scattered	113_heart_yellow_blue.jpg	114_heart_yellow_yellow.jpg	17	11	113_heart_yellow_blue.jpg	Blue	1	Incongruent	1294	CE	113_heart_yellow_blue.jpg 114_heart_yellow_yellow.jpg	1	N	3.11193
Gorilla	Ape	Blue	43382	0.564583	FisherCenter-PC	Adv Pref FC	Kwan	Phase 3_2-1.txt	24	290	2	None	3000	White	Scattered	119_square_blue_blue.jpg	120_square_blue_yellow.jpg	13	17	119_square_blue_blue.jpg	Blue	1	Congruent	2365	CE	119_square_blue_blue.jpg 120_square_blue_yellow.jpg	1	N	3.37383
Gorilla	Ape	Blue	43382	0.564583	FisherCenter-PC	Adv Pref FC	Kwan	Phase 3_2-1.txt	25	290	2	None	3000	White	Scattered	115_mug_blue.jpg	116_mug_yellow.jpg	17	15	115_mug_blue.jpg	Blue	1	Control	3062	CE	115_mug_blue.jpg 116_mug_yellow.jpg	1	N	3.48601
Gorilla	Ape	Blue	43382	0.564583	FisherCenter-PC	Adv Pref FC	Kwan	Phase 3_2-1.txt	26	290	2	None	3000	White	Scattered	123_star_blue_blue.jpg	124_star_blue_yellow.jpg	11	24	124_star_blue_yellow.jpg	Yellow	0	Congruent	1318	CE	123_star_blue_blue.jpg 124_star_blue_yellow.jpg	1	N	3.11992
Gorilla	Ape	Blue	43382	0.564583	FisherCenter-PC	Adv Pref FC	Kwan	Phase 3_2-1.txt	27	290	2	None	3000	White	Scattered	105_cross_yellow_blue.jpg	106_cross_yellow_yellow.jpg	11	21	105_cross_yellow_blue.jpg	Blue	1	Incongruent	1532	CE	105_cross_yellow_blue.jpg 106_cross_yellow_yellow.jpg	1	N	3.18526
Gorilla	Ape	Blue	43382	0.564583	FisherCenter-PC	Adv Pref FC	Kwan	Phase 3_2-1.txt	28	290	2	None	3000	White	Scattered	107_fidget_spinner_blue.jpg	108_fidget_spinner_yellow.jpg	23	17	107_fidget_spinner_blue.jpg	Blue	1	Control	1833	CE	107_fidget_spinner_blue.jpg 108_fidget_spinner_yellow.jpg	1	N	3.26316
Gorilla	Ape	Blue	43382	0.564583	FisherCenter-PC	Adv Pref FC	Kwan	Phase 3_2-1.txt	29	290	2	None	3000	White	Scattered	119_square_blue_blue.jpg	120_square_blue_yellow.jpg	22	25	119_square_blue_blue.jpg	Blue	1	Congruent	2234	CE	119_square_blue_blue.jpg 120_square_blue_yellow.jpg	1	N	3.34908
Gorilla	Ape	Blue	43382	0.564583	FisherCenter-PC	Adv Pref FC	Kwan	Phase 3_2-1.txt	30	290	2	None	3000	White	Scattered	115_mug_blue.jpg	116_mug_yellow.jpg	25	24	115_mug_blue.jpg	Blue	1	Control	1239	CE	115_mug_blue.jpg 116_mug_yellow.jpg	1	N	3.09307
Gorilla	Ape	Blue	43384	0.565972	FisherCenter-PC	Adv Pref FC	Kwan	Phase 3_2-2.txt	1	290	2	None	3000	White	Scattered	115_mug_blue.jpg	116_mug_yellow.jpg	21	23	116_mug_yellow.jpg	Yellow	0	Control	1363	CE	115_mug_blue.jpg 116_mug_yellow.jpg	2	N	3.1345
Gorilla	Ape	Blue	43384	0.565972	FisherCenter-PC	Adv Pref FC	Kwan	Phase 3_2-2.txt	2	290	2	None	3000	White	Scattered	125_star_yellow_blue.jpg	126_star_yellow_yellow.jpg	25	13	125_star_yellow_blue.jpg	Blue	1	Incongruent	1181	CE	125_star_yellow_blue.jpg 126_star_yellow_yellow.jpg	2	N	3.07225
Gorilla	Ape	Blue	43384	0.565972	FisherCenter-PC	Adv Pref FC	Kwan	Phase 3_2-2.txt	3	290	2	None	3000	White	Scattered	109_fork_blue.jpg	110_fork_yellow.jpg	13	20	109_fork_blue.jpg	Blue	1	Control	7450	CE	109_fork_blue.jpg 110_fork_yellow.jpg	2	Y	3.87216
Gorilla	Ape	Blue	43384	0.565972	FisherCenter-PC	Adv Pref FC	Kwan	Phase 3_2-2.txt	4	290	2	None	3000	White	Scattered	123_star_blue_blue.jpg	124_star_blue_yellow.jpg	18	23	123_star_blue_blue.jpg	Blue	1	Congruent	2154	CE	123_star_blue_blue.jpg 124_star_blue_yellow.jpg	2	N	3.33325
Gorilla	Ape	Blue	43384	0.565972	FisherCenter-PC	Adv Pref FC	Kwan	Phase 3_2-2.txt	5	290	2	None	3000	White	Scattered	105_cross_yellow_blue.jpg	106_cross_yellow_yellow.jpg	13	19	105_cross_yellow_blue.jpg	Blue	1	Incongruent	2116	CE	105_cross_yellow_blue.jpg 106_cross_yellow_yellow.jpg	2	N	3.32552
Gorilla	Ape	Blue	43384	0.565972	FisherCenter-PC	Adv Pref FC	Kwan	Phase 3_2-2.txt	6	290	2	None	3000	White	Scattered	125_star_yellow_blue.jpg	126_star_yellow_yellow.jpg	13	21	125_star_yellow_blue.jpg	Blue	1	Incongruent	1528	CE	125_star_yellow_blue.jpg 126_star_yellow_yellow.jpg	2	N	3.18412
Gorilla	Ape	Blue	43384	0.565972	FisherCenter-PC	Adv Pref FC	Kwan	Phase 3_2-2.txt	7	290	2	None	3000	White	Scattered	115_mug_blue.jpg	116_mug_yellow.jpg	19	24	115_mug_blue.jpg	Blue	1	Control	1251	CE	115_mug_blue.jpg 116_mug_yellow.jpg	2	N	3.09726
Gorilla	Ape	Blue	43384	0.565972	FisherCenter-PC	Adv Pref FC	Kwan	Phase 3_2-2.txt	8	290	2	None	3000	White	Scattered	111_heart_blue_blue.jpg	112_heart_blue_yellow.jpg	12	25	112_heart_blue_yellow.jpg	Yellow	0	Congruent	1942	CE	111_heart_blue_blue.jpg 112_heart_blue_yellow.jpg	2	N	3.28825
Gorilla	Ape	Blue	43384	0.565972	FisherCenter-PC	Adv Pref FC	Kwan	Phase 3_2-2.txt	9	290	2	None	3000	White	Scattered	121_square_yellow_blue.jpg	122_square_yellow_yellow.jpg	19	18	121_square_yellow_blue.jpg	Blue	1	Incongruent	1495	CE	121_square_yellow_blue.jpg 122_square_yellow_yellow.jpg	2	N	3.17464
Gorilla	Ape	Blue	43384	0.565972	FisherCenter-PC	Adv Pref FC	Kwan	Phase 3_2-2.txt	10	290	2	None	3000	White	Scattered	101_bicycle_blue.JPG	102_bicycle_yellow.JPG	14	20	101_bicycle_blue.JPG	Blue	1	Control	1206	CE	101_bicycle_blue.JPG 102_bicycle_yellow.JPG	2	N	3.08135
Gorilla	Ape	Blue	43384	0.565972	FisherCenter-PC	Adv Pref FC	Kwan	Phase 3_2-2.txt	11	290	2	None	3000	White	Scattered	105_cross_yellow_blue.jpg	106_cross_yellow_yellow.jpg	12	17	106_cross_yellow_yellow.jpg	Yellow	0	Incongruent	3015	CE	105_cross_yellow_blue.jpg 106_cross_yellow_yellow.jpg	2	N	3.47929
Gorilla	Ape	Blue	43384	0.565972	FisherCenter-PC	Adv Pref FC	Kwan	Phase 3_2-2.txt	12	290	2	None	3000	White	Scattered	107_fidget_spinner_blue.jpg	108_fidget_spinner_yellow.jpg	21	16	108_fidget_spinner_yellow.jpg	Yellow	0	Control	2423	CE	107_fidget_spinner_blue.jpg 108_fidget_spinner_yellow.jpg	2	N	3.38435
Gorilla	Ape	Blue	43384	0.565972	FisherCenter-PC	Adv Pref FC	Kwan	Phase 3_2-2.txt	13	290	2	None	3000	White	Scattered	125_star_yellow_blue.jpg	126_star_yellow_yellow.jpg	23	22	126_star_yellow_yellow.jpg	Yellow	0	Incongruent	1206	CE	125_star_yellow_blue.jpg 126_star_yellow_yellow.jpg	2	N	3.08135
Gorilla	Ape	Blue	43384	0.565972	FisherCenter-PC	Adv Pref FC	Kwan	Phase 3_2-2.txt	14	290	2	None	3000	White	Scattered	103_cross_blue_blue.JPG	104_cross_blue_yellow.JPG	20	19	104_cross_blue_yellow.JPG	Yellow	0	Congruent	976	CE	103_cross_blue_blue.JPG 104_cross_blue_yellow.JPG	2	N	2.98945
Gorilla	Ape	Blue	43384	0.565972	FisherCenter-PC	Adv Pref FC	Kwan	Phase 3_2-2.txt	15	290	2	None	3000	White	Scattered	109_fork_blue.jpg	110_fork_yellow.jpg	11	18	110_fork_yellow.jpg	Yellow	0	Control	1969	CE	109_fork_blue.jpg 110_fork_yellow.jpg	2	N	3.29425
Gorilla	Ape	Blue	43384	0.565972	FisherCenter-PC	Adv Pref FC	Kwan	Phase 3_2-2.txt	16	290	2	None	3000	White	Scattered	121_square_yellow_blue.jpg	122_square_yellow_yellow.jpg	21	23	121_square_yellow_blue.jpg	Blue	1	Incongruent	1877	CE	121_square_yellow_blue.jpg 122_square_yellow_yellow.jpg	2	N	3.27346
Gorilla	Ape	Blue	43384	0.565972	FisherCenter-PC	Adv Pref FC	Kwan	Phase 3_2-2.txt	17	290	2	None	3000	White	Scattered	119_square_blue_blue.jpg	120_square_blue_yellow.jpg	11	24	120_square_blue_yellow.jpg	Yellow	0	Congruent	1007	CE	119_square_blue_blue.jpg 120_square_blue_yellow.jpg	2	N	3.00303
Gorilla	Ape	Blue	43384	0.565972	FisherCenter-PC	Adv Pref FC	Kwan	Phase 3_2-2.txt	18	290	2	None	3000	White	Scattered	113_heart_yellow_blue.jpg	114_heart_yellow_yellow.jpg	23	19	113_heart_yellow_blue.jpg	Blue	1	Incongruent	1559	CE	113_heart_yellow_blue.jpg 114_heart_yellow_yellow.jpg	2	N	3.19285
Gorilla	Ape	Blue	43384	0.565972	FisherCenter-PC	Adv Pref FC	Kwan	Phase 3_2-2.txt	19	290	2	None	3000	White	Scattered	117_shovel_blue.jpg	118_shovel_yellow.jpg	11	21	117_shovel_blue.jpg	Blue	1	Control	2047	CE	117_shovel_blue.jpg 118_shovel_yellow.jpg	2	N	3.31112
Gorilla	Ape	Blue	43384	0.565972	FisherCenter-PC	Adv Pref FC	Kwan	Phase 3_2-2.txt	20	290	2	None	3000	White	Scattered	103_cross_blue_blue.JPG	104_cross_blue_yellow.JPG	20	22	103_cross_blue_blue.JPG	Blue	1	Congruent	3655	CE	103_cross_blue_blue.JPG 104_cross_blue_yellow.JPG	2	N	3.56289
Gorilla	Ape	Blue	43384	0.565972	FisherCenter-PC	Adv Pref FC	Kwan	Phase 3_2-2.txt	21	290	2	None	3000	White	Scattered	107_fidget_spinner_blue.jpg	108_fidget_spinner_yellow.jpg	20	12	107_fidget_spinner_blue.jpg	Blue	1	Control	1390	CE	107_fidget_spinner_blue.jpg 108_fidget_spinner_yellow.jpg	2	N	3.14301
Gorilla	Ape	Blue	43384	0.565972	FisherCenter-PC	Adv Pref FC	Kwan	Phase 3_2-2.txt	22	290	2	None	3000	White	Scattered	123_star_blue_blue.jpg	124_star_blue_yellow.jpg	16	14	123_star_blue_blue.jpg	Blue	1	Congruent	3187	CE	123_star_blue_blue.jpg 124_star_blue_yellow.jpg	2	N	3.50338
Gorilla	Ape	Blue	43384	0.565972	FisherCenter-PC	Adv Pref FC	Kwan	Phase 3_2-2.txt	23	290	2	None	3000	White	Scattered	113_heart_yellow_blue.jpg	114_heart_yellow_yellow.jpg	18	17	113_heart_yellow_blue.jpg	Blue	1	Incongruent	1969	CE	113_heart_yellow_blue.jpg 114_heart_yellow_yellow.jpg	2	N	3.29425
Gorilla	Ape	Blue	43384	0.565972	FisherCenter-PC	Adv Pref FC	Kwan	Phase 3_2-2.txt	24	290	2	None	3000	White	Scattered	119_square_blue_blue.jpg	120_square_blue_yellow.jpg	24	17	120_square_blue_yellow.jpg	Yellow	0	Congruent	5843	CE	119_square_blue_blue.jpg 120_square_blue_yellow.jpg	2	Y	3.76664
Gorilla	Ape	Blue	43384	0.565972	FisherCenter-PC	Adv Pref FC	Kwan	Phase 3_2-2.txt	25	290	2	None	3000	White	Scattered	117_shovel_blue.jpg	118_shovel_yellow.jpg	14	13	117_shovel_blue.jpg	Blue	1	Control	995	CE	117_shovel_blue.jpg 118_shovel_yellow.jpg	2	N	2.99782
Gorilla	Ape	Blue	43384	0.565972	FisherCenter-PC	Adv Pref FC	Kwan	Phase 3_2-2.txt	26	290	2	None	3000	White	Scattered	105_cross_yellow_blue.jpg	106_cross_yellow_yellow.jpg	14	15	105_cross_yellow_blue.jpg	Blue	1	Incongruent	1379	CE	105_cross_yellow_blue.jpg 106_cross_yellow_yellow.jpg	2	N	3.13956
Gorilla	Ape	Blue	43384	0.565972	FisherCenter-PC	Adv Pref FC	Kwan	Phase 3_2-2.txt	27	290	2	None	3000	White	Scattered	123_star_blue_blue.jpg	124_star_blue_yellow.jpg	23	25	123_star_blue_blue.jpg	Blue	1	Congruent	1580	CE	123_star_blue_blue.jpg 124_star_blue_yellow.jpg	2	N	3.19866
Gorilla	Ape	Blue	43384	0.565972	FisherCenter-PC	Adv Pref FC	Kwan	Phase 3_2-2.txt	28	290	2	None	3000	White	Scattered	111_heart_blue_blue.jpg	112_heart_blue_yellow.jpg	21	24	112_heart_blue_yellow.jpg	Yellow	0	Congruent	1624	CE	111_heart_blue_blue.jpg 112_heart_blue_yellow.jpg	2	N	3.21059
Gorilla	Ape	Blue	43384	0.565972	FisherCenter-PC	Adv Pref FC	Kwan	Phase 3_2-2.txt	29	290	2	None	3000	White	Scattered	101_bicycle_blue.JPG	102_bicycle_yellow.JPG	21	18	102_bicycle_yellow.JPG	Yellow	0	Control	974	CE	101_bicycle_blue.JPG 102_bicycle_yellow.JPG	2	N	2.98856
Gorilla	Ape	Blue	43384	0.565972	FisherCenter-PC	Adv Pref FC	Kwan	Phase 3_2-2.txt	30	290	2	None	3000	White	Scattered	103_cross_blue_blue.JPG	104_cross_blue_yellow.JPG	11	21	103_cross_blue_blue.JPG	Blue	1	Congruent	1132	CE	103_cross_blue_blue.JPG 104_cross_blue_yellow.JPG	2	N	3.05385
Gorilla	Ape	Blue	43385	0.565278	FisherCenter-PC	Adv Pref FC	Kwan	Phase 3_2-3.txt	1	290	2	None	3000	White	Scattered	119_square_blue_blue.jpg	120_square_blue_yellow.jpg	19	12	119_square_blue_blue.jpg	Blue	1	Congruent	1203	CE	119_square_blue_blue.jpg 120_square_blue_yellow.jpg	3	N	3.08027
Gorilla	Ape	Blue	43385	0.565278	FisherCenter-PC	Adv Pref FC	Kwan	Phase 3_2-3.txt	2	290	2	None	3000	White	Scattered	125_star_yellow_blue.jpg	126_star_yellow_yellow.jpg	19	22	125_star_yellow_blue.jpg	Blue	1	Incongruent	1147	CE	125_star_yellow_blue.jpg 126_star_yellow_yellow.jpg	3	N	3.05956
Gorilla	Ape	Blue	43385	0.565278	FisherCenter-PC	Adv Pref FC	Kwan	Phase 3_2-3.txt	3	290	2	None	3000	White	Scattered	111_heart_blue_blue.jpg	112_heart_blue_yellow.jpg	16	19	112_heart_blue_yellow.jpg	Yellow	0	Congruent	1171	CE	111_heart_blue_blue.jpg 112_heart_blue_yellow.jpg	3	N	3.06856
Gorilla	Ape	Blue	43385	0.565278	FisherCenter-PC	Adv Pref FC	Kwan	Phase 3_2-3.txt	4	290	2	None	3000	White	Scattered	105_cross_yellow_blue.jpg	106_cross_yellow_yellow.jpg	12	21	105_cross_yellow_blue.jpg	Blue	1	Incongruent	1016	CE	105_cross_yellow_blue.jpg 106_cross_yellow_yellow.jpg	3	N	3.00689
Gorilla	Ape	Blue	43385	0.565278	FisherCenter-PC	Adv Pref FC	Kwan	Phase 3_2-3.txt	5	290	2	None	3000	White	Scattered	115_mug_blue.jpg	116_mug_yellow.jpg	25	19	116_mug_yellow.jpg	Yellow	0	Control	910	CE	115_mug_blue.jpg 116_mug_yellow.jpg	3	N	2.95904
Gorilla	Ape	Blue	43385	0.565278	FisherCenter-PC	Adv Pref FC	Kwan	Phase 3_2-3.txt	6	290	2	None	3000	White	Scattered	113_heart_yellow_blue.jpg	114_heart_yellow_yellow.jpg	23	14	113_heart_yellow_blue.jpg	Blue	1	Incongruent	2970	CE	113_heart_yellow_blue.jpg 114_heart_yellow_yellow.jpg	3	N	3.47276
Gorilla	Ape	Blue	43385	0.565278	FisherCenter-PC	Adv Pref FC	Kwan	Phase 3_2-3.txt	7	290	2	None	3000	White	Scattered	103_cross_blue_blue.JPG	104_cross_blue_yellow.JPG	25	15	104_cross_blue_yellow.JPG	Yellow	0	Congruent	987	CE	103_cross_blue_blue.JPG 104_cross_blue_yellow.JPG	3	N	2.99432
Gorilla	Ape	Blue	43385	0.565278	FisherCenter-PC	Adv Pref FC	Kwan	Phase 3_2-3.txt	8	290	2	None	3000	White	Scattered	101_bicycle_blue.JPG	102_bicycle_yellow.JPG	15	22	101_bicycle_blue.JPG	Blue	1	Control	1098	CE	101_bicycle_blue.JPG 102_bicycle_yellow.JPG	3	N	3.0406
Gorilla	Ape	Blue	43385	0.565278	FisherCenter-PC	Adv Pref FC	Kwan	Phase 3_2-3.txt	9	290	2	None	3000	White	Scattered	103_cross_blue_blue.JPG	104_cross_blue_yellow.JPG	23	12	103_cross_blue_blue.JPG	Blue	1	Congruent	2991	CE	103_cross_blue_blue.JPG 104_cross_blue_yellow.JPG	3	N	3.47582
Gorilla	Ape	Blue	43385	0.565278	FisherCenter-PC	Adv Pref FC	Kwan	Phase 3_2-3.txt	10	290	2	None	3000	White	Scattered	109_fork_blue.jpg	110_fork_yellow.jpg	12	16	109_fork_blue.jpg	Blue	1	Control	1846	CE	109_fork_blue.jpg 110_fork_yellow.jpg	3	N	3.26623
Gorilla	Ape	Blue	43385	0.565278	FisherCenter-PC	Adv Pref FC	Kwan	Phase 3_2-3.txt	11	290	2	None	3000	White	Scattered	123_star_blue_blue.jpg	124_star_blue_yellow.jpg	19	25	123_star_blue_blue.jpg	Blue	1	Congruent	1143	CE	123_star_blue_blue.jpg 124_star_blue_yellow.jpg	3	N	3.05805
Gorilla	Ape	Blue	43385	0.565278	FisherCenter-PC	Adv Pref FC	Kwan	Phase 3_2-3.txt	12	290	2	None	3000	White	Scattered	105_cross_yellow_blue.jpg	106_cross_yellow_yellow.jpg	25	19	106_cross_yellow_yellow.jpg	Yellow	0	Incongruent	894	CE	105_cross_yellow_blue.jpg 106_cross_yellow_yellow.jpg	3	N	2.95134
Gorilla	Ape	Blue	43385	0.565278	FisherCenter-PC	Adv Pref FC	Kwan	Phase 3_2-3.txt	13	290	2	None	3000	White	Scattered	101_bicycle_blue.JPG	102_bicycle_yellow.JPG	25	12	101_bicycle_blue.JPG	Blue	1	Control	2188	CE	101_bicycle_blue.JPG 102_bicycle_yellow.JPG	3	N	3.34005
Gorilla	Ape	Blue	43385	0.565278	FisherCenter-PC	Adv Pref FC	Kwan	Phase 3_2-3.txt	14	290	2	None	3000	White	Scattered	121_square_yellow_blue.jpg	122_square_yellow_yellow.jpg	21	17	121_square_yellow_blue.jpg	Blue	1	Incongruent	2326	CE	121_square_yellow_blue.jpg 122_square_yellow_yellow.jpg	3	N	3.36661
Gorilla	Ape	Blue	43385	0.565278	FisherCenter-PC	Adv Pref FC	Kwan	Phase 3_2-3.txt	15	290	2	None	3000	White	Scattered	119_square_blue_blue.jpg	120_square_blue_yellow.jpg	22	14	120_square_blue_yellow.jpg	Yellow	0	Congruent	1110	CE	119_square_blue_blue.jpg 120_square_blue_yellow.jpg	3	N	3.04532
Gorilla	Ape	Blue	43385	0.565278	FisherCenter-PC	Adv Pref FC	Kwan	Phase 3_2-3.txt	16	290	2	None	3000	White	Scattered	121_square_yellow_blue.jpg	122_square_yellow_yellow.jpg	20	25	121_square_yellow_blue.jpg	Blue	1	Incongruent	1078	CE	121_square_yellow_blue.jpg 122_square_yellow_yellow.jpg	3	N	3.03262
Gorilla	Ape	Blue	43385	0.565278	FisherCenter-PC	Adv Pref FC	Kwan	Phase 3_2-3.txt	17	290	2	None	3000	White	Scattered	109_fork_blue.jpg	110_fork_yellow.jpg	13	23	109_fork_blue.jpg	Blue	1	Control	1091	CE	109_fork_blue.jpg 110_fork_yellow.jpg	3	N	3.03782
Gorilla	Ape	Blue	43385	0.565278	FisherCenter-PC	Adv Pref FC	Kwan	Phase 3_2-3.txt	18	290	2	None	3000	White	Scattered	111_heart_blue_blue.jpg	112_heart_blue_yellow.jpg	15	20	111_heart_blue_blue.jpg	Blue	1	Congruent	1028	CE	111_heart_blue_blue.jpg 112_heart_blue_yellow.jpg	3	N	3.01199
Gorilla	Ape	Blue	43385	0.565278	FisherCenter-PC	Adv Pref FC	Kwan	Phase 3_2-3.txt	19	290	2	None	3000	White	Scattered	107_fidget_spinner_blue.jpg	108_fidget_spinner_yellow.jpg	22	16	107_fidget_spinner_blue.jpg	Blue	1	Control	1807	CE	107_fidget_spinner_blue.jpg 108_fidget_spinner_yellow.jpg	3	N	3.25696
Gorilla	Ape	Blue	43385	0.565278	FisherCenter-PC	Adv Pref FC	Kwan	Phase 3_2-3.txt	20	290	2	None	3000	White	Scattered	119_square_blue_blue.jpg	120_square_blue_yellow.jpg	20	25	119_square_blue_blue.jpg	Blue	1	Congruent	1302	CE	119_square_blue_blue.jpg 120_square_blue_yellow.jpg	3	N	3.11461
Gorilla	Ape	Blue	43385	0.565278	FisherCenter-PC	Adv Pref FC	Kwan	Phase 3_2-3.txt	21	290	2	None	3000	White	Scattered	121_square_yellow_blue.jpg	122_square_yellow_yellow.jpg	17	19	121_square_yellow_blue.jpg	Blue	1	Incongruent	1553	CE	121_square_yellow_blue.jpg 122_square_yellow_yellow.jpg	3	N	3.19117
Gorilla	Ape	Blue	43385	0.565278	FisherCenter-PC	Adv Pref FC	Kwan	Phase 3_2-3.txt	22	290	2	None	3000	White	Scattered	117_shovel_blue.jpg	118_shovel_yellow.jpg	18	20	117_shovel_blue.jpg	Blue	1	Control	1228	CE	117_shovel_blue.jpg 118_shovel_yellow.jpg	3	N	3.0892
Gorilla	Ape	Blue	43385	0.565278	FisherCenter-PC	Adv Pref FC	Kwan	Phase 3_2-3.txt	23	290	2	None	3000	White	Scattered	113_heart_yellow_blue.jpg	114_heart_yellow_yellow.jpg	13	24	113_heart_yellow_blue.jpg	Blue	1	Incongruent	1707	CE	113_heart_yellow_blue.jpg 114_heart_yellow_yellow.jpg	3	N	3.23223
Gorilla	Ape	Blue	43385	0.565278	FisherCenter-PC	Adv Pref FC	Kwan	Phase 3_2-3.txt	24	290	2	None	3000	White	Scattered	115_mug_blue.jpg	116_mug_yellow.jpg	24	25	115_mug_blue.jpg	Blue	1	Control	1429	CE	115_mug_blue.jpg 116_mug_yellow.jpg	3	N	3.15503
Gorilla	Ape	Blue	43385	0.565278	FisherCenter-PC	Adv Pref FC	Kwan	Phase 3_2-3.txt	25	290	2	None	3000	White	Scattered	111_heart_blue_blue.jpg	112_heart_blue_yellow.jpg	13	20	112_heart_blue_yellow.jpg	Yellow	0	Congruent	2452	CE	111_heart_blue_blue.jpg 112_heart_blue_yellow.jpg	3	N	3.38952
Gorilla	Ape	Blue	43385	0.565278	FisherCenter-PC	Adv Pref FC	Kwan	Phase 3_2-3.txt	26	290	2	None	3000	White	Scattered	125_star_yellow_blue.jpg	126_star_yellow_yellow.jpg	12	14	126_star_yellow_yellow.jpg	Yellow	0	Incongruent	1261	CE	125_star_yellow_blue.jpg 126_star_yellow_yellow.jpg	3	N	3.10072
Gorilla	Ape	Blue	43385	0.565278	FisherCenter-PC	Adv Pref FC	Kwan	Phase 3_2-3.txt	27	290	2	None	3000	White	Scattered	117_shovel_blue.jpg	118_shovel_yellow.jpg	19	11	117_shovel_blue.jpg	Blue	1	Control	925	CE	117_shovel_blue.jpg 118_shovel_yellow.jpg	3	N	2.96614
Gorilla	Ape	Blue	43385	0.565278	FisherCenter-PC	Adv Pref FC	Kwan	Phase 3_2-3.txt	28	290	2	None	3000	White	Scattered	113_heart_yellow_blue.jpg	114_heart_yellow_yellow.jpg	24	21	114_heart_yellow_yellow.jpg	Yellow	0	Incongruent	2530	CE	113_heart_yellow_blue.jpg 114_heart_yellow_yellow.jpg	3	N	3.40312
Gorilla	Ape	Blue	43385	0.565278	FisherCenter-PC	Adv Pref FC	Kwan	Phase 3_2-3.txt	29	290	2	None	3000	White	Scattered	107_fidget_spinner_blue.jpg	108_fidget_spinner_yellow.jpg	23	20	108_fidget_spinner_yellow.jpg	Yellow	0	Control	1423	CE	107_fidget_spinner_blue.jpg 108_fidget_spinner_yellow.jpg	3	N	3.1532
Gorilla	Ape	Blue	43385	0.565278	FisherCenter-PC	Adv Pref FC	Kwan	Phase 3_2-3.txt	30	290	2	None	3000	White	Scattered	123_star_blue_blue.jpg	124_star_blue_yellow.jpg	12	21	124_star_blue_yellow.jpg	Yellow	0	Congruent	1956	CE	123_star_blue_blue.jpg 124_star_blue_yellow.jpg	3	N	3.29137
Gorilla	Ape	Blue	43388	0.565278	FisherCenter-PC	Adv Pref FC	Kwan	Phase 3_2-4.txt	1	290	2	None	3000	White	Scattered	123_star_blue_blue.jpg	124_star_blue_yellow.jpg	17	25	123_star_blue_blue.jpg	Blue	1	Congruent	973	CE	123_star_blue_blue.jpg 124_star_blue_yellow.jpg	4	N	2.98811
Gorilla	Ape	Blue	43388	0.565278	FisherCenter-PC	Adv Pref FC	Kwan	Phase 3_2-4.txt	2	290	2	None	3000	White	Scattered	115_mug_blue.jpg	116_mug_yellow.jpg	21	14	116_mug_yellow.jpg	Yellow	0	Control	893	CE	115_mug_blue.jpg 116_mug_yellow.jpg	4	N	2.95085
Gorilla	Ape	Blue	43388	0.565278	FisherCenter-PC	Adv Pref FC	Kwan	Phase 3_2-4.txt	3	290	2	None	3000	White	Scattered	105_cross_yellow_blue.jpg	106_cross_yellow_yellow.jpg	21	13	105_cross_yellow_blue.jpg	Blue	1	Incongruent	1109	CE	105_cross_yellow_blue.jpg 106_cross_yellow_yellow.jpg	4	N	3.04493
Gorilla	Ape	Blue	43388	0.565278	FisherCenter-PC	Adv Pref FC	Kwan	Phase 3_2-4.txt	4	290	2	None	3000	White	Scattered	109_fork_blue.jpg	110_fork_yellow.jpg	16	21	109_fork_blue.jpg	Blue	1	Control	801	CE	109_fork_blue.jpg 110_fork_yellow.jpg	4	N	2.90363
Gorilla	Ape	Blue	43388	0.565278	FisherCenter-PC	Adv Pref FC	Kwan	Phase 3_2-4.txt	5	290	2	None	3000	White	Scattered	123_star_blue_blue.jpg	124_star_blue_yellow.jpg	12	14	123_star_blue_blue.jpg	Blue	1	Congruent	1630	CE	123_star_blue_blue.jpg 124_star_blue_yellow.jpg	4	N	3.21219
Gorilla	Ape	Blue	43388	0.565278	FisherCenter-PC	Adv Pref FC	Kwan	Phase 3_2-4.txt	6	290	2	None	3000	White	Scattered	113_heart_yellow_blue.jpg	114_heart_yellow_yellow.jpg	23	17	113_heart_yellow_blue.jpg	Blue	1	Incongruent	907	CE	113_heart_yellow_blue.jpg 114_heart_yellow_yellow.jpg	4	N	2.95761
Gorilla	Ape	Blue	43388	0.565278	FisherCenter-PC	Adv Pref FC	Kwan	Phase 3_2-4.txt	7	290	2	None	3000	White	Scattered	117_shovel_blue.jpg	118_shovel_yellow.jpg	19	23	117_shovel_blue.jpg	Blue	1	Control	784	CE	117_shovel_blue.jpg 118_shovel_yellow.jpg	4	N	2.89432
Gorilla	Ape	Blue	43388	0.565278	FisherCenter-PC	Adv Pref FC	Kwan	Phase 3_2-4.txt	8	290	2	None	3000	White	Scattered	125_star_yellow_blue.jpg	126_star_yellow_yellow.jpg	24	14	125_star_yellow_blue.jpg	Blue	1	Incongruent	1051	CE	125_star_yellow_blue.jpg 126_star_yellow_yellow.jpg	4	N	3.0216
Gorilla	Ape	Blue	43388	0.565278	FisherCenter-PC	Adv Pref FC	Kwan	Phase 3_2-4.txt	9	290	2	None	3000	White	Scattered	109_fork_blue.jpg	110_fork_yellow.jpg	25	24	109_fork_blue.jpg	Blue	1	Control	1078	CE	109_fork_blue.jpg 110_fork_yellow.jpg	4	N	3.03262
Gorilla	Ape	Blue	43388	0.565278	FisherCenter-PC	Adv Pref FC	Kwan	Phase 3_2-4.txt	10	290	2	None	3000	White	Scattered	113_heart_yellow_blue.jpg	114_heart_yellow_yellow.jpg	14	22	113_heart_yellow_blue.jpg	Blue	1	Incongruent	842	CE	113_heart_yellow_blue.jpg 114_heart_yellow_yellow.jpg	4	N	2.92531
Gorilla	Ape	Blue	43388	0.565278	FisherCenter-PC	Adv Pref FC	Kwan	Phase 3_2-4.txt	11	290	2	None	3000	White	Scattered	111_heart_blue_blue.jpg	112_heart_blue_yellow.jpg	18	15	112_heart_blue_yellow.jpg	Yellow	0	Congruent	1057	CE	111_heart_blue_blue.jpg 112_heart_blue_yellow.jpg	4	N	3.02407
Gorilla	Ape	Blue	43388	0.565278	FisherCenter-PC	Adv Pref FC	Kwan	Phase 3_2-4.txt	12	290	2	None	3000	White	Scattered	119_square_blue_blue.jpg	120_square_blue_yellow.jpg	18	19	120_square_blue_yellow.jpg	Yellow	0	Congruent	1484	CE	119_square_blue_blue.jpg 120_square_blue_yellow.jpg	4	N	3.17143
Gorilla	Ape	Blue	43388	0.565278	FisherCenter-PC	Adv Pref FC	Kwan	Phase 3_2-4.txt	13	290	2	None	3000	White	Scattered	105_cross_yellow_blue.jpg	106_cross_yellow_yellow.jpg	13	20	105_cross_yellow_blue.jpg	Blue	1	Incongruent	2171	CE	105_cross_yellow_blue.jpg 106_cross_yellow_yellow.jpg	4	N	3.33666
Gorilla	Ape	Blue	43388	0.565278	FisherCenter-PC	Adv Pref FC	Kwan	Phase 3_2-4.txt	14	290	2	None	3000	White	Scattered	101_bicycle_blue.JPG	102_bicycle_yellow.JPG	16	17	102_bicycle_yellow.JPG	Yellow	0	Control	2299	CE	101_bicycle_blue.JPG 102_bicycle_yellow.JPG	4	N	3.36154
Gorilla	Ape	Blue	43388	0.565278	FisherCenter-PC	Adv Pref FC	Kwan	Phase 3_2-4.txt	15	290	2	None	3000	White	Scattered	119_square_blue_blue.jpg	120_square_blue_yellow.jpg	15	20	119_square_blue_blue.jpg	Blue	1	Congruent	932	CE	119_square_blue_blue.jpg 120_square_blue_yellow.jpg	4	N	2.96942
Gorilla	Ape	Blue	43388	0.565278	FisherCenter-PC	Adv Pref FC	Kwan	Phase 3_2-4.txt	16	290	2	None	3000	White	Scattered	105_cross_yellow_blue.jpg	106_cross_yellow_yellow.jpg	18	22	105_cross_yellow_blue.jpg	Blue	1	Incongruent	1073	CE	105_cross_yellow_blue.jpg 106_cross_yellow_yellow.jpg	4	N	3.0306
Gorilla	Ape	Blue	43388	0.565278	FisherCenter-PC	Adv Pref FC	Kwan	Phase 3_2-4.txt	17	290	2	None	3000	White	Scattered	103_cross_blue_blue.JPG	104_cross_blue_yellow.JPG	25	13	104_cross_blue_yellow.JPG	Yellow	0	Congruent	896	CE	103_cross_blue_blue.JPG 104_cross_blue_yellow.JPG	4	N	2.95231
Gorilla	Ape	Blue	43388	0.565278	FisherCenter-PC	Adv Pref FC	Kwan	Phase 3_2-4.txt	18	290	2	None	3000	White	Scattered	115_mug_blue.jpg	116_mug_yellow.jpg	17	21	115_mug_blue.jpg	Blue	1	Control	817	CE	115_mug_blue.jpg 116_mug_yellow.jpg	4	N	2.91222
Gorilla	Ape	Blue	43388	0.565278	FisherCenter-PC	Adv Pref FC	Kwan	Phase 3_2-4.txt	19	290	2	None	3000	White	Scattered	125_star_yellow_blue.jpg	126_star_yellow_yellow.jpg	18	25	125_star_yellow_blue.jpg	Blue	1	Incongruent	1515	CE	125_star_yellow_blue.jpg 126_star_yellow_yellow.jpg	4	N	3.18041
Gorilla	Ape	Blue	43388	0.565278	FisherCenter-PC	Adv Pref FC	Kwan	Phase 3_2-4.txt	20	290	2	None	3000	White	Scattered	107_fidget_spinner_blue.jpg	108_fidget_spinner_yellow.jpg	15	14	107_fidget_spinner_blue.jpg	Blue	1	Control	1129	CE	107_fidget_spinner_blue.jpg 108_fidget_spinner_yellow.jpg	4	N	3.05269
Gorilla	Ape	Blue	43388	0.565278	FisherCenter-PC	Adv Pref FC	Kwan	Phase 3_2-4.txt	21	290	2	None	3000	White	Scattered	123_star_blue_blue.jpg	124_star_blue_yellow.jpg	24	19	124_star_blue_yellow.jpg	Yellow	0	Congruent	1276	CE	123_star_blue_blue.jpg 124_star_blue_yellow.jpg	4	N	3.10585
Gorilla	Ape	Blue	43388	0.565278	FisherCenter-PC	Adv Pref FC	Kwan	Phase 3_2-4.txt	22	290	2	None	3000	White	Scattered	101_bicycle_blue.JPG	102_bicycle_yellow.JPG	12	23	101_bicycle_blue.JPG	Blue	1	Control	1127	CE	101_bicycle_blue.JPG 102_bicycle_yellow.JPG	4	N	3.05192
Gorilla	Ape	Blue	43388	0.565278	FisherCenter-PC	Adv Pref FC	Kwan	Phase 3_2-4.txt	23	290	2	None	3000	White	Scattered	121_square_yellow_blue.jpg	122_square_yellow_yellow.jpg	23	21	121_square_yellow_blue.jpg	Blue	1	Incongruent	970	CE	121_square_yellow_blue.jpg 122_square_yellow_yellow.jpg	4	N	2.98677
Gorilla	Ape	Blue	43388	0.565278	FisherCenter-PC	Adv Pref FC	Kwan	Phase 3_2-4.txt	24	290	2	None	3000	White	Scattered	111_heart_blue_blue.jpg	112_heart_blue_yellow.jpg	13	14	112_heart_blue_yellow.jpg	Yellow	0	Congruent	1010	CE	111_heart_blue_blue.jpg 112_heart_blue_yellow.jpg	4	N	3.00432
Gorilla	Ape	Blue	43388	0.565278	FisherCenter-PC	Adv Pref FC	Kwan	Phase 3_2-4.txt	25	290	2	None	3000	White	Scattered	107_fidget_spinner_blue.jpg	108_fidget_spinner_yellow.jpg	14	18	107_fidget_spinner_blue.jpg	Blue	1	Control	852	CE	107_fidget_spinner_blue.jpg 108_fidget_spinner_yellow.jpg	4	N	2.93044
Gorilla	Ape	Blue	43388	0.565278	FisherCenter-PC	Adv Pref FC	Kwan	Phase 3_2-4.txt	26	290	2	None	3000	White	Scattered	103_cross_blue_blue.JPG	104_cross_blue_yellow.JPG	23	16	103_cross_blue_blue.JPG	Blue	1	Congruent	1179	CE	103_cross_blue_blue.JPG 104_cross_blue_yellow.JPG	4	N	3.07151
Gorilla	Ape	Blue	43388	0.565278	FisherCenter-PC	Adv Pref FC	Kwan	Phase 3_2-4.txt	27	290	2	None	3000	White	Scattered	125_star_yellow_blue.jpg	126_star_yellow_yellow.jpg	23	13	125_star_yellow_blue.jpg	Blue	1	Incongruent	2009	CE	125_star_yellow_blue.jpg 126_star_yellow_yellow.jpg	4	N	3.30298
Gorilla	Ape	Blue	43388	0.565278	FisherCenter-PC	Adv Pref FC	Kwan	Phase 3_2-4.txt	28	290	2	None	3000	White	Scattered	117_shovel_blue.jpg	118_shovel_yellow.jpg	19	16	117_shovel_blue.jpg	Blue	1	Control	2362	CE	117_shovel_blue.jpg 118_shovel_yellow.jpg	4	N	3.37328
Gorilla	Ape	Blue	43388	0.565278	FisherCenter-PC	Adv Pref FC	Kwan	Phase 3_2-4.txt	29	290	2	None	3000	White	Scattered	121_square_yellow_blue.jpg	122_square_yellow_yellow.jpg	18	17	121_square_yellow_blue.jpg	Blue	1	Incongruent	1654	CE	121_square_yellow_blue.jpg 122_square_yellow_yellow.jpg	4	N	3.21854
Gorilla	Ape	Blue	43388	0.565278	FisherCenter-PC	Adv Pref FC	Kwan	Phase 3_2-4.txt	30	290	2	None	3000	White	Scattered	103_cross_blue_blue.JPG	104_cross_blue_yellow.JPG	19	12	103_cross_blue_blue.JPG	Blue	1	Congruent	868	CE	103_cross_blue_blue.JPG 104_cross_blue_yellow.JPG	4	N	2.93852
Gorilla	Ape	Blue	43390	0.566667	FisherCenter-PC	Adv Pref FC	Kwan	Phase 3_1-1.txt	1	290	2	None	3000	White	Scattered	115_mug_blue.jpg	116_mug_yellow.jpg	23	19	116_mug_yellow.jpg	Yellow	0	Control	1277	CE	115_mug_blue.jpg 116_mug_yellow.jpg	5	N	3.10619
Gorilla	Ape	Blue	43390	0.566667	FisherCenter-PC	Adv Pref FC	Kwan	Phase 3_1-1.txt	2	290	2	None	3000	White	Scattered	125_star_yellow_blue.jpg	126_star_yellow_yellow.jpg	19	17	125_star_yellow_blue.jpg	Blue	1	Incongruent	785	CE	125_star_yellow_blue.jpg 126_star_yellow_yellow.jpg	5	N	2.89487
Gorilla	Ape	Blue	43390	0.566667	FisherCenter-PC	Adv Pref FC	Kwan	Phase 3_1-1.txt	3	290	2	None	3000	White	Scattered	109_fork_blue.jpg	110_fork_yellow.jpg	23	13	109_fork_blue.jpg	Blue	1	Control	961	CE	109_fork_blue.jpg 110_fork_yellow.jpg	5	N	2.98272
Gorilla	Ape	Blue	43390	0.566667	FisherCenter-PC	Adv Pref FC	Kwan	Phase 3_1-1.txt	4	290	2	None	3000	White	Scattered	123_star_blue_blue.jpg	124_star_blue_yellow.jpg	17	22	123_star_blue_blue.jpg	Blue	1	Congruent	2018	CE	123_star_blue_blue.jpg 124_star_blue_yellow.jpg	5	N	3.30492
Gorilla	Ape	Blue	43390	0.566667	FisherCenter-PC	Adv Pref FC	Kwan	Phase 3_1-1.txt	5	290	2	None	3000	White	Scattered	105_cross_yellow_blue.jpg	106_cross_yellow_yellow.jpg	23	20	105_cross_yellow_blue.jpg	Blue	1	Incongruent	788	CE	105_cross_yellow_blue.jpg 106_cross_yellow_yellow.jpg	5	N	2.89653
Gorilla	Ape	Blue	43390	0.566667	FisherCenter-PC	Adv Pref FC	Kwan	Phase 3_1-1.txt	6	290	2	None	3000	White	Scattered	125_star_yellow_blue.jpg	126_star_yellow_yellow.jpg	14	17	125_star_yellow_blue.jpg	Blue	1	Incongruent	777	CE	125_star_yellow_blue.jpg 126_star_yellow_yellow.jpg	5	N	2.89042
Gorilla	Ape	Blue	43390	0.566667	FisherCenter-PC	Adv Pref FC	Kwan	Phase 3_1-1.txt	7	290	2	None	3000	White	Scattered	115_mug_blue.jpg	116_mug_yellow.jpg	21	20	116_mug_yellow.jpg	Yellow	0	Control	2252	CE	115_mug_blue.jpg 116_mug_yellow.jpg	5	N	3.35257
Gorilla	Ape	Blue	43390	0.566667	FisherCenter-PC	Adv Pref FC	Kwan	Phase 3_1-1.txt	8	290	2	None	3000	White	Scattered	111_heart_blue_blue.jpg	112_heart_blue_yellow.jpg	21	11	111_heart_blue_blue.jpg	Blue	1	Congruent	1174	CE	111_heart_blue_blue.jpg 112_heart_blue_yellow.jpg	5	N	3.06967
Gorilla	Ape	Blue	43390	0.566667	FisherCenter-PC	Adv Pref FC	Kwan	Phase 3_1-1.txt	9	290	2	None	3000	White	Scattered	121_square_yellow_blue.jpg	122_square_yellow_yellow.jpg	16	19	121_square_yellow_blue.jpg	Blue	1	Incongruent	1569	CE	121_square_yellow_blue.jpg 122_square_yellow_yellow.jpg	5	N	3.19562
Gorilla	Ape	Blue	43390	0.566667	FisherCenter-PC	Adv Pref FC	Kwan	Phase 3_1-1.txt	10	290	2	None	3000	White	Scattered	101_bicycle_blue.JPG	102_bicycle_yellow.JPG	21	15	102_bicycle_yellow.JPG	Yellow	0	Control	888	CE	101_bicycle_blue.JPG 102_bicycle_yellow.JPG	5	N	2.94841
Gorilla	Ape	Blue	43390	0.566667	FisherCenter-PC	Adv Pref FC	Kwan	Phase 3_1-1.txt	11	290	2	None	3000	White	Scattered	105_cross_yellow_blue.jpg	106_cross_yellow_yellow.jpg	15	11	105_cross_yellow_blue.jpg	Blue	1	Incongruent	1151	CE	105_cross_yellow_blue.jpg 106_cross_yellow_yellow.jpg	5	N	3.06108
Gorilla	Ape	Blue	43390	0.566667	FisherCenter-PC	Adv Pref FC	Kwan	Phase 3_1-1.txt	12	290	2	None	3000	White	Scattered	107_fidget_spinner_blue.jpg	108_fidget_spinner_yellow.jpg	24	18	108_fidget_spinner_yellow.jpg	Yellow	0	Control	903	CE	107_fidget_spinner_blue.jpg 108_fidget_spinner_yellow.jpg	5	N	2.95569
Gorilla	Ape	Blue	43390	0.566667	FisherCenter-PC	Adv Pref FC	Kwan	Phase 3_1-1.txt	13	290	2	None	3000	White	Scattered	125_star_yellow_blue.jpg	126_star_yellow_yellow.jpg	16	17	126_star_yellow_yellow.jpg	Yellow	0	Incongruent	937	CE	125_star_yellow_blue.jpg 126_star_yellow_yellow.jpg	5	N	2.97174
Gorilla	Ape	Blue	43390	0.566667	FisherCenter-PC	Adv Pref FC	Kwan	Phase 3_1-1.txt	14	290	2	None	3000	White	Scattered	103_cross_blue_blue.JPG	104_cross_blue_yellow.JPG	21	20	104_cross_blue_yellow.JPG	Yellow	0	Congruent	864	CE	103_cross_blue_blue.JPG 104_cross_blue_yellow.JPG	5	N	2.93651
Gorilla	Ape	Blue	43390	0.566667	FisherCenter-PC	Adv Pref FC	Kwan	Phase 3_1-1.txt	15	290	2	None	3000	White	Scattered	109_fork_blue.jpg	110_fork_yellow.jpg	24	18	110_fork_yellow.jpg	Yellow	0	Control	1141	CE	109_fork_blue.jpg 110_fork_yellow.jpg	5	N	3.05729
Gorilla	Ape	Blue	43390	0.566667	FisherCenter-PC	Adv Pref FC	Kwan	Phase 3_1-1.txt	16	290	2	None	3000	White	Scattered	121_square_yellow_blue.jpg	122_square_yellow_yellow.jpg	16	21	121_square_yellow_blue.jpg	Blue	1	Incongruent	1358	CE	121_square_yellow_blue.jpg 122_square_yellow_yellow.jpg	5	N	3.1329
Gorilla	Ape	Blue	43390	0.566667	FisherCenter-PC	Adv Pref FC	Kwan	Phase 3_1-1.txt	17	290	2	None	3000	White	Scattered	119_square_blue_blue.jpg	120_square_blue_yellow.jpg	23	21	119_square_blue_blue.jpg	Blue	1	Congruent	2317	CE	119_square_blue_blue.jpg 120_square_blue_yellow.jpg	5	N	3.36493
Gorilla	Ape	Blue	43390	0.566667	FisherCenter-PC	Adv Pref FC	Kwan	Phase 3_1-1.txt	18	290	2	None	3000	White	Scattered	113_heart_yellow_blue.jpg	114_heart_yellow_yellow.jpg	22	15	114_heart_yellow_yellow.jpg	Yellow	0	Incongruent	1203	CE	113_heart_yellow_blue.jpg 114_heart_yellow_yellow.jpg	5	N	3.08027
Gorilla	Ape	Blue	43390	0.566667	FisherCenter-PC	Adv Pref FC	Kwan	Phase 3_1-1.txt	19	290	2	None	3000	White	Scattered	117_shovel_blue.jpg	118_shovel_yellow.jpg	18	16	117_shovel_blue.jpg	Blue	1	Control	912	CE	117_shovel_blue.jpg 118_shovel_yellow.jpg	5	N	2.95999
Gorilla	Ape	Blue	43390	0.566667	FisherCenter-PC	Adv Pref FC	Kwan	Phase 3_1-1.txt	20	290	2	None	3000	White	Scattered	103_cross_blue_blue.JPG	104_cross_blue_yellow.JPG	21	20	104_cross_blue_yellow.JPG	Yellow	0	Congruent	1134	CE	103_cross_blue_blue.JPG 104_cross_blue_yellow.JPG	5	N	3.05461
Gorilla	Ape	Blue	43390	0.566667	FisherCenter-PC	Adv Pref FC	Kwan	Phase 3_1-1.txt	21	290	2	None	3000	White	Scattered	107_fidget_spinner_blue.jpg	108_fidget_spinner_yellow.jpg	12	15	108_fidget_spinner_yellow.jpg	Yellow	0	Control	1259	CE	107_fidget_spinner_blue.jpg 108_fidget_spinner_yellow.jpg	5	N	3.10003
Gorilla	Ape	Blue	43390	0.566667	FisherCenter-PC	Adv Pref FC	Kwan	Phase 3_1-1.txt	22	290	2	None	3000	White	Scattered	123_star_blue_blue.jpg	124_star_blue_yellow.jpg	11	23	124_star_blue_yellow.jpg	Yellow	0	Congruent	1015	CE	123_star_blue_blue.jpg 124_star_blue_yellow.jpg	5	N	3.00647
Gorilla	Ape	Blue	43390	0.566667	FisherCenter-PC	Adv Pref FC	Kwan	Phase 3_1-1.txt	23	290	2	None	3000	White	Scattered	113_heart_yellow_blue.jpg	114_heart_yellow_yellow.jpg	18	22	113_heart_yellow_blue.jpg	Blue	1	Incongruent	873	CE	113_heart_yellow_blue.jpg 114_heart_yellow_yellow.jpg	5	N	2.94101
Gorilla	Ape	Blue	43390	0.566667	FisherCenter-PC	Adv Pref FC	Kwan	Phase 3_1-1.txt	24	290	2	None	3000	White	Scattered	119_square_blue_blue.jpg	120_square_blue_yellow.jpg	23	24	119_square_blue_blue.jpg	Blue	1	Congruent	5432	CE	119_square_blue_blue.jpg 120_square_blue_yellow.jpg	5	Y	3.73496
Gorilla	Ape	Blue	43390	0.566667	FisherCenter-PC	Adv Pref FC	Kwan	Phase 3_1-1.txt	25	290	2	None	3000	White	Scattered	117_shovel_blue.jpg	118_shovel_yellow.jpg	24	12	117_shovel_blue.jpg	Blue	1	Control	1551	CE	117_shovel_blue.jpg 118_shovel_yellow.jpg	5	N	3.19061
Gorilla	Ape	Blue	43390	0.566667	FisherCenter-PC	Adv Pref FC	Kwan	Phase 3_1-1.txt	26	290	2	None	3000	White	Scattered	105_cross_yellow_blue.jpg	106_cross_yellow_yellow.jpg	15	24	105_cross_yellow_blue.jpg	Blue	1	Incongruent	1137	CE	105_cross_yellow_blue.jpg 106_cross_yellow_yellow.jpg	5	N	3.05576
Gorilla	Ape	Blue	43390	0.566667	FisherCenter-PC	Adv Pref FC	Kwan	Phase 3_1-1.txt	27	290	2	None	3000	White	Scattered	123_star_blue_blue.jpg	124_star_blue_yellow.jpg	20	17	123_star_blue_blue.jpg	Blue	1	Congruent	948	CE	123_star_blue_blue.jpg 124_star_blue_yellow.jpg	5	N	2.97681
Gorilla	Ape	Blue	43390	0.566667	FisherCenter-PC	Adv Pref FC	Kwan	Phase 3_1-1.txt	28	290	2	None	3000	White	Scattered	111_heart_blue_blue.jpg	112_heart_blue_yellow.jpg	11	21	111_heart_blue_blue.jpg	Blue	1	Congruent	1212	CE	111_heart_blue_blue.jpg 112_heart_blue_yellow.jpg	5	N	3.0835
Gorilla	Ape	Blue	43390	0.566667	FisherCenter-PC	Adv Pref FC	Kwan	Phase 3_1-1.txt	29	290	2	None	3000	White	Scattered	101_bicycle_blue.JPG	102_bicycle_yellow.JPG	12	15	102_bicycle_yellow.JPG	Yellow	0	Control	1239	CE	101_bicycle_blue.JPG 102_bicycle_yellow.JPG	5	N	3.09307
Gorilla	Ape	Blue	43390	0.566667	FisherCenter-PC	Adv Pref FC	Kwan	Phase 3_1-1.txt	30	290	2	None	3000	White	Scattered	103_cross_blue_blue.JPG	104_cross_blue_yellow.JPG	24	11	103_cross_blue_blue.JPG	Blue	1	Congruent	991	CE	103_cross_blue_blue.JPG 104_cross_blue_yellow.JPG	5	N	2.99607
Gorilla	Ape	Blue	43391	0.565278	FisherCenter-PC	Adv Pref FC	Kwan	Phase 3_1-2.txt	1	290	2	None	3000	White	Scattered	113_heart_yellow_blue.jpg	114_heart_yellow_yellow.jpg	21	19	114_heart_yellow_yellow.jpg	Yellow	0	Incongruent	2148	CE	113_heart_yellow_blue.jpg 114_heart_yellow_yellow.jpg	6	N	3.33203
Gorilla	Ape	Blue	43391	0.565278	FisherCenter-PC	Adv Pref FC	Kwan	Phase 3_1-2.txt	2	290	2	None	3000	White	Scattered	103_cross_blue_blue.JPG	104_cross_blue_yellow.JPG	24	19	104_cross_blue_yellow.JPG	Yellow	0	Congruent	911	CE	103_cross_blue_blue.JPG 104_cross_blue_yellow.JPG	6	N	2.95952
Gorilla	Ape	Blue	43391	0.565278	FisherCenter-PC	Adv Pref FC	Kwan	Phase 3_1-2.txt	3	290	2	None	3000	White	Scattered	121_square_yellow_blue.jpg	122_square_yellow_yellow.jpg	23	11	121_square_yellow_blue.jpg	Blue	1	Incongruent	1263	CE	121_square_yellow_blue.jpg 122_square_yellow_yellow.jpg	6	N	3.1014
Gorilla	Ape	Blue	43391	0.565278	FisherCenter-PC	Adv Pref FC	Kwan	Phase 3_1-2.txt	4	290	2	None	3000	White	Scattered	117_shovel_blue.jpg	118_shovel_yellow.jpg	25	17	117_shovel_blue.jpg	Blue	1	Control	3976	CE	117_shovel_blue.jpg 118_shovel_yellow.jpg	6	Y	3.59945
Gorilla	Ape	Blue	43391	0.565278	FisherCenter-PC	Adv Pref FC	Kwan	Phase 3_1-2.txt	5	290	2	None	3000	White	Scattered	123_star_blue_blue.jpg	124_star_blue_yellow.jpg	20	16	124_star_blue_yellow.jpg	Yellow	0	Congruent	1261	CE	123_star_blue_blue.jpg 124_star_blue_yellow.jpg	6	N	3.10072
Gorilla	Ape	Blue	43391	0.565278	FisherCenter-PC	Adv Pref FC	Kwan	Phase 3_1-2.txt	6	290	2	None	3000	White	Scattered	109_fork_blue.jpg	110_fork_yellow.jpg	18	20	110_fork_yellow.jpg	Yellow	0	Control	940	CE	109_fork_blue.jpg 110_fork_yellow.jpg	6	N	2.97313
Gorilla	Ape	Blue	43391	0.565278	FisherCenter-PC	Adv Pref FC	Kwan	Phase 3_1-2.txt	7	290	2	None	3000	White	Scattered	121_square_yellow_blue.jpg	122_square_yellow_yellow.jpg	15	21	121_square_yellow_blue.jpg	Blue	1	Incongruent	957	CE	121_square_yellow_blue.jpg 122_square_yellow_yellow.jpg	6	N	2.98091
Gorilla	Ape	Blue	43391	0.565278	FisherCenter-PC	Adv Pref FC	Kwan	Phase 3_1-2.txt	8	290	2	None	3000	White	Scattered	111_heart_blue_blue.jpg	112_heart_blue_yellow.jpg	23	21	111_heart_blue_blue.jpg	Blue	1	Congruent	1261	CE	111_heart_blue_blue.jpg 112_heart_blue_yellow.jpg	6	N	3.10072
Gorilla	Ape	Blue	43391	0.565278	FisherCenter-PC	Adv Pref FC	Kwan	Phase 3_1-2.txt	9	290	2	None	3000	White	Scattered	125_star_yellow_blue.jpg	126_star_yellow_yellow.jpg	20	25	125_star_yellow_blue.jpg	Blue	1	Incongruent	933	CE	125_star_yellow_blue.jpg 126_star_yellow_yellow.jpg	6	N	2.96988
Gorilla	Ape	Blue	43391	0.565278	FisherCenter-PC	Adv Pref FC	Kwan	Phase 3_1-2.txt	10	290	2	None	3000	White	Scattered	107_fidget_spinner_blue.jpg	108_fidget_spinner_yellow.jpg	21	12	108_fidget_spinner_yellow.jpg	Yellow	0	Control	1268	CE	107_fidget_spinner_blue.jpg 108_fidget_spinner_yellow.jpg	6	N	3.10312
Gorilla	Ape	Blue	43391	0.565278	FisherCenter-PC	Adv Pref FC	Kwan	Phase 3_1-2.txt	11	290	2	None	3000	White	Scattered	121_square_yellow_blue.jpg	122_square_yellow_yellow.jpg	20	24	122_square_yellow_yellow.jpg	Yellow	0	Incongruent	998	CE	121_square_yellow_blue.jpg 122_square_yellow_yellow.jpg	6	N	2.99913
Gorilla	Ape	Blue	43391	0.565278	FisherCenter-PC	Adv Pref FC	Kwan	Phase 3_1-2.txt	12	290	2	None	3000	White	Scattered	111_heart_blue_blue.jpg	112_heart_blue_yellow.jpg	13	15	112_heart_blue_yellow.jpg	Yellow	0	Congruent	1215	CE	111_heart_blue_blue.jpg 112_heart_blue_yellow.jpg	6	N	3.08458
Gorilla	Ape	Blue	43391	0.565278	FisherCenter-PC	Adv Pref FC	Kwan	Phase 3_1-2.txt	13	290	2	None	3000	White	Scattered	119_square_blue_blue.jpg	120_square_blue_yellow.jpg	20	15	119_square_blue_blue.jpg	Blue	1	Congruent	988	CE	119_square_blue_blue.jpg 120_square_blue_yellow.jpg	6	N	2.99476
Gorilla	Ape	Blue	43391	0.565278	FisherCenter-PC	Adv Pref FC	Kwan	Phase 3_1-2.txt	14	290	2	None	3000	White	Scattered	113_heart_yellow_blue.jpg	114_heart_yellow_yellow.jpg	15	11	113_heart_yellow_blue.jpg	Blue	1	Incongruent	944	CE	113_heart_yellow_blue.jpg 114_heart_yellow_yellow.jpg	6	N	2.97497
Gorilla	Ape	Blue	43391	0.565278	FisherCenter-PC	Adv Pref FC	Kwan	Phase 3_1-2.txt	15	290	2	None	3000	White	Scattered	109_fork_blue.jpg	110_fork_yellow.jpg	24	11	109_fork_blue.jpg	Blue	1	Control	1016	CE	109_fork_blue.jpg 110_fork_yellow.jpg	6	N	3.00689
Gorilla	Ape	Blue	43391	0.565278	FisherCenter-PC	Adv Pref FC	Kwan	Phase 3_1-2.txt	16	290	2	None	3000	White	Scattered	111_heart_blue_blue.jpg	112_heart_blue_yellow.jpg	19	11	111_heart_blue_blue.jpg	Blue	1	Congruent	1090	CE	111_heart_blue_blue.jpg 112_heart_blue_yellow.jpg	6	N	3.03743
Gorilla	Ape	Blue	43391	0.565278	FisherCenter-PC	Adv Pref FC	Kwan	Phase 3_1-2.txt	17	290	2	None	3000	White	Scattered	103_cross_blue_blue.JPG	104_cross_blue_yellow.JPG	15	22	103_cross_blue_blue.JPG	Blue	1	Congruent	983	CE	103_cross_blue_blue.JPG 104_cross_blue_yellow.JPG	6	N	2.99255
Gorilla	Ape	Blue	43391	0.565278	FisherCenter-PC	Adv Pref FC	Kwan	Phase 3_1-2.txt	18	290	2	None	3000	White	Scattered	101_bicycle_blue.JPG	102_bicycle_yellow.JPG	17	15	102_bicycle_yellow.JPG	Yellow	0	Control	1066	CE	101_bicycle_blue.JPG 102_bicycle_yellow.JPG	6	N	3.02776
Gorilla	Ape	Blue	43391	0.565278	FisherCenter-PC	Adv Pref FC	Kwan	Phase 3_1-2.txt	19	290	2	None	3000	White	Scattered	105_cross_yellow_blue.jpg	106_cross_yellow_yellow.jpg	14	18	106_cross_yellow_yellow.jpg	Yellow	0	Incongruent	969	CE	105_cross_yellow_blue.jpg 106_cross_yellow_yellow.jpg	6	N	2.98632
Gorilla	Ape	Blue	43391	0.565278	FisherCenter-PC	Adv Pref FC	Kwan	Phase 3_1-2.txt	20	290	2	None	3000	White	Scattered	117_shovel_blue.jpg	118_shovel_yellow.jpg	16	25	117_shovel_blue.jpg	Blue	1	Control	1274	CE	117_shovel_blue.jpg 118_shovel_yellow.jpg	6	N	3.10517
Gorilla	Ape	Blue	43391	0.565278	FisherCenter-PC	Adv Pref FC	Kwan	Phase 3_1-2.txt	21	290	2	None	3000	White	Scattered	125_star_yellow_blue.jpg	126_star_yellow_yellow.jpg	11	16	126_star_yellow_yellow.jpg	Yellow	0	Incongruent	1105	CE	125_star_yellow_blue.jpg 126_star_yellow_yellow.jpg	6	N	3.04336
Gorilla	Ape	Blue	43391	0.565278	FisherCenter-PC	Adv Pref FC	Kwan	Phase 3_1-2.txt	22	290	2	None	3000	White	Scattered	101_bicycle_blue.JPG	102_bicycle_yellow.JPG	14	11	101_bicycle_blue.JPG	Blue	1	Control	1673	CE	101_bicycle_blue.JPG 102_bicycle_yellow.JPG	6	N	3.2235
Gorilla	Ape	Blue	43391	0.565278	FisherCenter-PC	Adv Pref FC	Kwan	Phase 3_1-2.txt	23	290	2	None	3000	White	Scattered	113_heart_yellow_blue.jpg	114_heart_yellow_yellow.jpg	23	13	113_heart_yellow_blue.jpg	Blue	1	Incongruent	6408	CE	113_heart_yellow_blue.jpg 114_heart_yellow_yellow.jpg	6	Y	3.80672
Gorilla	Ape	Blue	43391	0.565278	FisherCenter-PC	Adv Pref FC	Kwan	Phase 3_1-2.txt	24	290	2	None	3000	White	Scattered	119_square_blue_blue.jpg	120_square_blue_yellow.jpg	23	19	120_square_blue_yellow.jpg	Yellow	0	Congruent	1612	CE	119_square_blue_blue.jpg 120_square_blue_yellow.jpg	6	N	3.20737
Gorilla	Ape	Blue	43391	0.565278	FisherCenter-PC	Adv Pref FC	Kwan	Phase 3_1-2.txt	25	290	2	None	3000	White	Scattered	115_mug_blue.jpg	116_mug_yellow.jpg	22	14	116_mug_yellow.jpg	Yellow	0	Control	1243	CE	115_mug_blue.jpg 116_mug_yellow.jpg	6	N	3.09447
Gorilla	Ape	Blue	43391	0.565278	FisherCenter-PC	Adv Pref FC	Kwan	Phase 3_1-2.txt	26	290	2	None	3000	White	Scattered	123_star_blue_blue.jpg	124_star_blue_yellow.jpg	12	20	124_star_blue_yellow.jpg	Yellow	0	Congruent	1873	CE	123_star_blue_blue.jpg 124_star_blue_yellow.jpg	6	N	3.27254
Gorilla	Ape	Blue	43391	0.565278	FisherCenter-PC	Adv Pref FC	Kwan	Phase 3_1-2.txt	27	290	2	None	3000	White	Scattered	105_cross_yellow_blue.jpg	106_cross_yellow_yellow.jpg	18	19	105_cross_yellow_blue.jpg	Blue	1	Incongruent	1095	CE	105_cross_yellow_blue.jpg 106_cross_yellow_yellow.jpg	6	N	3.03941
Gorilla	Ape	Blue	43391	0.565278	FisherCenter-PC	Adv Pref FC	Kwan	Phase 3_1-2.txt	28	290	2	None	3000	White	Scattered	107_fidget_spinner_blue.jpg	108_fidget_spinner_yellow.jpg	20	19	108_fidget_spinner_yellow.jpg	Yellow	0	Control	1004	CE	107_fidget_spinner_blue.jpg 108_fidget_spinner_yellow.jpg	6	N	3.00173
Gorilla	Ape	Blue	43391	0.565278	FisherCenter-PC	Adv Pref FC	Kwan	Phase 3_1-2.txt	29	290	2	None	3000	White	Scattered	119_square_blue_blue.jpg	120_square_blue_yellow.jpg	24	16	119_square_blue_blue.jpg	Blue	1	Congruent	1653	CE	119_square_blue_blue.jpg 120_square_blue_yellow.jpg	6	N	3.21827
Gorilla	Ape	Blue	43391	0.565278	FisherCenter-PC	Adv Pref FC	Kwan	Phase 3_1-2.txt	30	290	2	None	3000	White	Scattered	115_mug_blue.jpg	116_mug_yellow.jpg	21	20	116_mug_yellow.jpg	Yellow	0	Control	1072	CE	115_mug_blue.jpg 116_mug_yellow.jpg	6	N	3.03019
Gorilla	Ape	Blue	43392	0.565972	FisherCenter-PC	Adv Pref FC	Kwan	Phase 3_1-3.txt	1	290	2	None	3000	White	Scattered	123_star_blue_blue.jpg	124_star_blue_yellow.jpg	13	15	123_star_blue_blue.jpg	Blue	1	Congruent	935	CE	123_star_blue_blue.jpg 124_star_blue_yellow.jpg	7	N	2.97081
Gorilla	Ape	Blue	43392	0.565972	FisherCenter-PC	Adv Pref FC	Kwan	Phase 3_1-3.txt	2	290	2	None	3000	White	Scattered	115_mug_blue.jpg	116_mug_yellow.jpg	13	20	116_mug_yellow.jpg	Yellow	0	Control	1473	CE	115_mug_blue.jpg 116_mug_yellow.jpg	7	N	3.1682
Gorilla	Ape	Blue	43392	0.565972	FisherCenter-PC	Adv Pref FC	Kwan	Phase 3_1-3.txt	3	290	2	None	3000	White	Scattered	105_cross_yellow_blue.jpg	106_cross_yellow_yellow.jpg	24	21	105_cross_yellow_blue.jpg	Blue	1	Incongruent	1105	CE	105_cross_yellow_blue.jpg 106_cross_yellow_yellow.jpg	7	N	3.04336
Gorilla	Ape	Blue	43392	0.565972	FisherCenter-PC	Adv Pref FC	Kwan	Phase 3_1-3.txt	4	290	2	None	3000	White	Scattered	109_fork_blue.jpg	110_fork_yellow.jpg	21	22	110_fork_yellow.jpg	Yellow	0	Control	1486	CE	109_fork_blue.jpg 110_fork_yellow.jpg	7	N	3.17202
Gorilla	Ape	Blue	43392	0.565972	FisherCenter-PC	Adv Pref FC	Kwan	Phase 3_1-3.txt	5	290	2	None	3000	White	Scattered	123_star_blue_blue.jpg	124_star_blue_yellow.jpg	24	17	123_star_blue_blue.jpg	Blue	1	Congruent	1907	CE	123_star_blue_blue.jpg 124_star_blue_yellow.jpg	7	N	3.28035
Gorilla	Ape	Blue	43392	0.565972	FisherCenter-PC	Adv Pref FC	Kwan	Phase 3_1-3.txt	6	290	2	None	3000	White	Scattered	113_heart_yellow_blue.jpg	114_heart_yellow_yellow.jpg	17	14	113_heart_yellow_blue.jpg	Blue	1	Incongruent	3043	CE	113_heart_yellow_blue.jpg 114_heart_yellow_yellow.jpg	7	N	3.4833
Gorilla	Ape	Blue	43392	0.565972	FisherCenter-PC	Adv Pref FC	Kwan	Phase 3_1-3.txt	7	290	2	None	3000	White	Scattered	117_shovel_blue.jpg	118_shovel_yellow.jpg	13	24	117_shovel_blue.jpg	Blue	1	Control	944	CE	117_shovel_blue.jpg 118_shovel_yellow.jpg	7	N	2.97497
Gorilla	Ape	Blue	43392	0.565972	FisherCenter-PC	Adv Pref FC	Kwan	Phase 3_1-3.txt	8	290	2	None	3000	White	Scattered	125_star_yellow_blue.jpg	126_star_yellow_yellow.jpg	12	13	125_star_yellow_blue.jpg	Blue	1	Incongruent	1076	CE	125_star_yellow_blue.jpg 126_star_yellow_yellow.jpg	7	N	3.03181
Gorilla	Ape	Blue	43392	0.565972	FisherCenter-PC	Adv Pref FC	Kwan	Phase 3_1-3.txt	9	290	2	None	3000	White	Scattered	109_fork_blue.jpg	110_fork_yellow.jpg	13	16	109_fork_blue.jpg	Blue	1	Control	914	CE	109_fork_blue.jpg 110_fork_yellow.jpg	7	N	2.96095
Gorilla	Ape	Blue	43392	0.565972	FisherCenter-PC	Adv Pref FC	Kwan	Phase 3_1-3.txt	10	290	2	None	3000	White	Scattered	113_heart_yellow_blue.jpg	114_heart_yellow_yellow.jpg	11	15	114_heart_yellow_yellow.jpg	Yellow	0	Incongruent	973	CE	113_heart_yellow_blue.jpg 114_heart_yellow_yellow.jpg	7	N	2.98811
Gorilla	Ape	Blue	43392	0.565972	FisherCenter-PC	Adv Pref FC	Kwan	Phase 3_1-3.txt	11	290	2	None	3000	White	Scattered	111_heart_blue_blue.jpg	112_heart_blue_yellow.jpg	18	19	111_heart_blue_blue.jpg	Blue	1	Congruent	947	CE	111_heart_blue_blue.jpg 112_heart_blue_yellow.jpg	7	N	2.97635
Gorilla	Ape	Blue	43392	0.565972	FisherCenter-PC	Adv Pref FC	Kwan	Phase 3_1-3.txt	12	290	2	None	3000	White	Scattered	119_square_blue_blue.jpg	120_square_blue_yellow.jpg	11	19	120_square_blue_yellow.jpg	Yellow	0	Congruent	1148	CE	119_square_blue_blue.jpg 120_square_blue_yellow.jpg	7	N	3.05994
Gorilla	Ape	Blue	43392	0.565972	FisherCenter-PC	Adv Pref FC	Kwan	Phase 3_1-3.txt	13	290	2	None	3000	White	Scattered	105_cross_yellow_blue.jpg	106_cross_yellow_yellow.jpg	21	14	105_cross_yellow_blue.jpg	Blue	1	Incongruent	1455	CE	105_cross_yellow_blue.jpg 106_cross_yellow_yellow.jpg	7	N	3.16286
Gorilla	Ape	Blue	43392	0.565972	FisherCenter-PC	Adv Pref FC	Kwan	Phase 3_1-3.txt	14	290	2	None	3000	White	Scattered	101_bicycle_blue.JPG	102_bicycle_yellow.JPG	21	19	101_bicycle_blue.JPG	Blue	1	Control	1477	CE	101_bicycle_blue.JPG 102_bicycle_yellow.JPG	7	N	3.16938
Gorilla	Ape	Blue	43392	0.565972	FisherCenter-PC	Adv Pref FC	Kwan	Phase 3_1-3.txt	15	290	2	None	3000	White	Scattered	119_square_blue_blue.jpg	120_square_blue_yellow.jpg	19	12	119_square_blue_blue.jpg	Blue	1	Congruent	1949	CE	119_square_blue_blue.jpg 120_square_blue_yellow.jpg	7	N	3.28981
Gorilla	Ape	Blue	43392	0.565972	FisherCenter-PC	Adv Pref FC	Kwan	Phase 3_1-3.txt	16	290	2	None	3000	White	Scattered	105_cross_yellow_blue.jpg	106_cross_yellow_yellow.jpg	20	22	105_cross_yellow_blue.jpg	Blue	1	Incongruent	2037	CE	105_cross_yellow_blue.jpg 106_cross_yellow_yellow.jpg	7	N	3.30899
Gorilla	Ape	Blue	43392	0.565972	FisherCenter-PC	Adv Pref FC	Kwan	Phase 3_1-3.txt	17	290	2	None	3000	White	Scattered	103_cross_blue_blue.JPG	104_cross_blue_yellow.JPG	20	18	104_cross_blue_yellow.JPG	Yellow	0	Congruent	1407	CE	103_cross_blue_blue.JPG 104_cross_blue_yellow.JPG	7	N	3.14829
Gorilla	Ape	Blue	43392	0.565972	FisherCenter-PC	Adv Pref FC	Kwan	Phase 3_1-3.txt	18	290	2	None	3000	White	Scattered	115_mug_blue.jpg	116_mug_yellow.jpg	19	11	115_mug_blue.jpg	Blue	1	Control	917	CE	115_mug_blue.jpg 116_mug_yellow.jpg	7	N	2.96237
Gorilla	Ape	Blue	43392	0.565972	FisherCenter-PC	Adv Pref FC	Kwan	Phase 3_1-3.txt	19	290	2	None	3000	White	Scattered	125_star_yellow_blue.jpg	126_star_yellow_yellow.jpg	17	16	125_star_yellow_blue.jpg	Blue	1	Incongruent	1006	CE	125_star_yellow_blue.jpg 126_star_yellow_yellow.jpg	7	N	3.0026
Gorilla	Ape	Blue	43392	0.565972	FisherCenter-PC	Adv Pref FC	Kwan	Phase 3_1-3.txt	20	290	2	None	3000	White	Scattered	107_fidget_spinner_blue.jpg	108_fidget_spinner_yellow.jpg	13	12	107_fidget_spinner_blue.jpg	Blue	1	Control	1117	CE	107_fidget_spinner_blue.jpg 108_fidget_spinner_yellow.jpg	7	N	3.04805
Gorilla	Ape	Blue	43392	0.565972	FisherCenter-PC	Adv Pref FC	Kwan	Phase 3_1-3.txt	21	290	2	None	3000	White	Scattered	123_star_blue_blue.jpg	124_star_blue_yellow.jpg	14	17	124_star_blue_yellow.jpg	Yellow	0	Congruent	1172	CE	123_star_blue_blue.jpg 124_star_blue_yellow.jpg	7	N	3.06893
Gorilla	Ape	Blue	43392	0.565972	FisherCenter-PC	Adv Pref FC	Kwan	Phase 3_1-3.txt	22	290	2	None	3000	White	Scattered	101_bicycle_blue.JPG	102_bicycle_yellow.JPG	25	15	102_bicycle_yellow.JPG	Yellow	0	Control	1019	CE	101_bicycle_blue.JPG 102_bicycle_yellow.JPG	7	N	3.00817
Gorilla	Ape	Blue	43392	0.565972	FisherCenter-PC	Adv Pref FC	Kwan	Phase 3_1-3.txt	23	290	2	None	3000	White	Scattered	121_square_yellow_blue.jpg	122_square_yellow_yellow.jpg	25	16	121_square_yellow_blue.jpg	Blue	1	Incongruent	860	CE	121_square_yellow_blue.jpg 122_square_yellow_yellow.jpg	7	N	2.9345
Gorilla	Ape	Blue	43392	0.565972	FisherCenter-PC	Adv Pref FC	Kwan	Phase 3_1-3.txt	24	290	2	None	3000	White	Scattered	111_heart_blue_blue.jpg	112_heart_blue_yellow.jpg	12	18	111_heart_blue_blue.jpg	Blue	1	Congruent	897	CE	111_heart_blue_blue.jpg 112_heart_blue_yellow.jpg	7	N	2.95279
Gorilla	Ape	Blue	43392	0.565972	FisherCenter-PC	Adv Pref FC	Kwan	Phase 3_1-3.txt	25	290	2	None	3000	White	Scattered	107_fidget_spinner_blue.jpg	108_fidget_spinner_yellow.jpg	11	16	108_fidget_spinner_yellow.jpg	Yellow	0	Control	1642	CE	107_fidget_spinner_blue.jpg 108_fidget_spinner_yellow.jpg	7	N	3.21537
Gorilla	Ape	Blue	43392	0.565972	FisherCenter-PC	Adv Pref FC	Kwan	Phase 3_1-3.txt	26	290	2	None	3000	White	Scattered	103_cross_blue_blue.JPG	104_cross_blue_yellow.JPG	18	11	103_cross_blue_blue.JPG	Blue	1	Congruent	802	CE	103_cross_blue_blue.JPG 104_cross_blue_yellow.JPG	7	N	2.90417
Gorilla	Ape	Blue	43392	0.565972	FisherCenter-PC	Adv Pref FC	Kwan	Phase 3_1-3.txt	27	290	2	None	3000	White	Scattered	125_star_yellow_blue.jpg	126_star_yellow_yellow.jpg	17	16	125_star_yellow_blue.jpg	Blue	1	Incongruent	1037	CE	125_star_yellow_blue.jpg 126_star_yellow_yellow.jpg	7	N	3.01578
Gorilla	Ape	Blue	43392	0.565972	FisherCenter-PC	Adv Pref FC	Kwan	Phase 3_1-3.txt	28	290	2	None	3000	White	Scattered	117_shovel_blue.jpg	118_shovel_yellow.jpg	22	14	118_shovel_yellow.jpg	Yellow	0	Control	2236	CE	117_shovel_blue.jpg 118_shovel_yellow.jpg	7	N	3.34947
Gorilla	Ape	Blue	43392	0.565972	FisherCenter-PC	Adv Pref FC	Kwan	Phase 3_1-3.txt	29	290	2	None	3000	White	Scattered	121_square_yellow_blue.jpg	122_square_yellow_yellow.jpg	25	15	121_square_yellow_blue.jpg	Blue	1	Incongruent	1082	CE	121_square_yellow_blue.jpg 122_square_yellow_yellow.jpg	7	N	3.03423
Gorilla	Ape	Blue	43392	0.565972	FisherCenter-PC	Adv Pref FC	Kwan	Phase 3_1-3.txt	30	290	2	None	3000	White	Scattered	103_cross_blue_blue.JPG	104_cross_blue_yellow.JPG	12	16	103_cross_blue_blue.JPG	Blue	1	Congruent	1222	CE	103_cross_blue_blue.JPG 104_cross_blue_yellow.JPG	7	N	3.08707
Gorilla	Ape	Blue	43410	0.6	FisherCenter-PC	Adv Pref FC	Kwan	Phase 3_1-4.txt	1	290	2	None	3000	White	Scattered	119_square_blue_blue.jpg	120_square_blue_yellow.jpg	20	21	119_square_blue_blue.jpg	Blue	1	Congruent	1872	CE	119_square_blue_blue.jpg 120_square_blue_yellow.jpg	8	N	3.27231
Gorilla	Ape	Blue	43410	0.6	FisherCenter-PC	Adv Pref FC	Kwan	Phase 3_1-4.txt	2	290	2	None	3000	White	Scattered	125_star_yellow_blue.jpg	126_star_yellow_yellow.jpg	16	18	125_star_yellow_blue.jpg	Blue	1	Incongruent	3497	CE	125_star_yellow_blue.jpg 126_star_yellow_yellow.jpg	8	N	3.5437
Gorilla	Ape	Blue	43410	0.6	FisherCenter-PC	Adv Pref FC	Kwan	Phase 3_1-4.txt	3	290	2	None	3000	White	Scattered	111_heart_blue_blue.jpg	112_heart_blue_yellow.jpg	22	21	112_heart_blue_yellow.jpg	Yellow	0	Congruent	893	CE	111_heart_blue_blue.jpg 112_heart_blue_yellow.jpg	8	N	2.95085
Gorilla	Ape	Blue	43410	0.6	FisherCenter-PC	Adv Pref FC	Kwan	Phase 3_1-4.txt	4	290	2	None	3000	White	Scattered	105_cross_yellow_blue.jpg	106_cross_yellow_yellow.jpg	11	13	106_cross_yellow_yellow.jpg	Yellow	0	Incongruent	1273	CE	105_cross_yellow_blue.jpg 106_cross_yellow_yellow.jpg	8	N	3.10483
Gorilla	Ape	Blue	43410	0.6	FisherCenter-PC	Adv Pref FC	Kwan	Phase 3_1-4.txt	5	290	2	None	3000	White	Scattered	115_mug_blue.jpg	116_mug_yellow.jpg	22	20	116_mug_yellow.jpg	Yellow	0	Control	1222	CE	115_mug_blue.jpg 116_mug_yellow.jpg	8	N	3.08707
Gorilla	Ape	Blue	43410	0.6	FisherCenter-PC	Adv Pref FC	Kwan	Phase 3_1-4.txt	6	290	2	None	3000	White	Scattered	113_heart_yellow_blue.jpg	114_heart_yellow_yellow.jpg	17	24	113_heart_yellow_blue.jpg	Blue	1	Incongruent	816	CE	113_heart_yellow_blue.jpg 114_heart_yellow_yellow.jpg	8	N	2.91169
Gorilla	Ape	Blue	43410	0.6	FisherCenter-PC	Adv Pref FC	Kwan	Phase 3_1-4.txt	7	290	2	None	3000	White	Scattered	103_cross_blue_blue.JPG	104_cross_blue_yellow.JPG	13	19	104_cross_blue_yellow.JPG	Yellow	0	Congruent	978	CE	103_cross_blue_blue.JPG 104_cross_blue_yellow.JPG	8	N	2.99034
Gorilla	Ape	Blue	43410	0.6	FisherCenter-PC	Adv Pref FC	Kwan	Phase 3_1-4.txt	8	290	2	None	3000	White	Scattered	101_bicycle_blue.JPG	102_bicycle_yellow.JPG	20	22	102_bicycle_yellow.JPG	Yellow	0	Control	1017	CE	101_bicycle_blue.JPG 102_bicycle_yellow.JPG	8	N	3.00732
Gorilla	Ape	Blue	43410	0.6	FisherCenter-PC	Adv Pref FC	Kwan	Phase 3_1-4.txt	9	290	2	None	3000	White	Scattered	103_cross_blue_blue.JPG	104_cross_blue_yellow.JPG	12	17	103_cross_blue_blue.JPG	Blue	1	Congruent	1025	CE	103_cross_blue_blue.JPG 104_cross_blue_yellow.JPG	8	N	3.01072
Gorilla	Ape	Blue	43410	0.6	FisherCenter-PC	Adv Pref FC	Kwan	Phase 3_1-4.txt	10	290	2	None	3000	White	Scattered	109_fork_blue.jpg	110_fork_yellow.jpg	21	13	110_fork_yellow.jpg	Yellow	0	Control	1023	CE	109_fork_blue.jpg 110_fork_yellow.jpg	8	N	3.00988
Gorilla	Ape	Blue	43410	0.6	FisherCenter-PC	Adv Pref FC	Kwan	Phase 3_1-4.txt	11	290	2	None	3000	White	Scattered	123_star_blue_blue.jpg	124_star_blue_yellow.jpg	20	16	124_star_blue_yellow.jpg	Yellow	0	Congruent	1118	CE	123_star_blue_blue.jpg 124_star_blue_yellow.jpg	8	N	3.04844
Gorilla	Ape	Blue	43410	0.6	FisherCenter-PC	Adv Pref FC	Kwan	Phase 3_1-4.txt	12	290	2	None	3000	White	Scattered	105_cross_yellow_blue.jpg	106_cross_yellow_yellow.jpg	14	17	105_cross_yellow_blue.jpg	Blue	1	Incongruent	937	CE	105_cross_yellow_blue.jpg 106_cross_yellow_yellow.jpg	8	N	2.97174
Gorilla	Ape	Blue	43410	0.6	FisherCenter-PC	Adv Pref FC	Kwan	Phase 3_1-4.txt	13	290	2	None	3000	White	Scattered	101_bicycle_blue.JPG	102_bicycle_yellow.JPG	12	14	101_bicycle_blue.JPG	Blue	1	Control	1027	CE	101_bicycle_blue.JPG 102_bicycle_yellow.JPG	8	N	3.01157
Gorilla	Ape	Blue	43410	0.6	FisherCenter-PC	Adv Pref FC	Kwan	Phase 3_1-4.txt	14	290	2	None	3000	White	Scattered	121_square_yellow_blue.jpg	122_square_yellow_yellow.jpg	14	21	121_square_yellow_blue.jpg	Blue	1	Incongruent	1238	CE	121_square_yellow_blue.jpg 122_square_yellow_yellow.jpg	8	N	3.09272
Gorilla	Ape	Blue	43410	0.6	FisherCenter-PC	Adv Pref FC	Kwan	Phase 3_1-4.txt	15	290	2	None	3000	White	Scattered	119_square_blue_blue.jpg	120_square_blue_yellow.jpg	16	23	119_square_blue_blue.jpg	Blue	1	Congruent	1084	CE	119_square_blue_blue.jpg 120_square_blue_yellow.jpg	8	N	3.03503
Gorilla	Ape	Blue	43410	0.6	FisherCenter-PC	Adv Pref FC	Kwan	Phase 3_1-4.txt	16	290	2	None	3000	White	Scattered	121_square_yellow_blue.jpg	122_square_yellow_yellow.jpg	21	11	122_square_yellow_yellow.jpg	Yellow	0	Incongruent	1094	CE	121_square_yellow_blue.jpg 122_square_yellow_yellow.jpg	8	N	3.03902
Gorilla	Ape	Blue	43410	0.6	FisherCenter-PC	Adv Pref FC	Kwan	Phase 3_1-4.txt	17	290	2	None	3000	White	Scattered	109_fork_blue.jpg	110_fork_yellow.jpg	12	19	109_fork_blue.jpg	Blue	1	Control	909	CE	109_fork_blue.jpg 110_fork_yellow.jpg	8	N	2.95856
Gorilla	Ape	Blue	43410	0.6	FisherCenter-PC	Adv Pref FC	Kwan	Phase 3_1-4.txt	18	290	2	None	3000	White	Scattered	111_heart_blue_blue.jpg	112_heart_blue_yellow.jpg	12	17	111_heart_blue_blue.jpg	Blue	1	Congruent	835	CE	111_heart_blue_blue.jpg 112_heart_blue_yellow.jpg	8	N	2.92169
Gorilla	Ape	Blue	43410	0.6	FisherCenter-PC	Adv Pref FC	Kwan	Phase 3_1-4.txt	19	290	2	None	3000	White	Scattered	107_fidget_spinner_blue.jpg	108_fidget_spinner_yellow.jpg	22	23	107_fidget_spinner_blue.jpg	Blue	1	Control	1286	CE	107_fidget_spinner_blue.jpg 108_fidget_spinner_yellow.jpg	8	N	3.10924
Gorilla	Ape	Blue	43410	0.6	FisherCenter-PC	Adv Pref FC	Kwan	Phase 3_1-4.txt	20	290	2	None	3000	White	Scattered	119_square_blue_blue.jpg	120_square_blue_yellow.jpg	21	17	120_square_blue_yellow.jpg	Yellow	0	Congruent	872	CE	119_square_blue_blue.jpg 120_square_blue_yellow.jpg	8	N	2.94052
Gorilla	Ape	Blue	43410	0.6	FisherCenter-PC	Adv Pref FC	Kwan	Phase 3_1-4.txt	21	290	2	None	3000	White	Scattered	121_square_yellow_blue.jpg	122_square_yellow_yellow.jpg	14	25	121_square_yellow_blue.jpg	Blue	1	Incongruent	1017	CE	121_square_yellow_blue.jpg 122_square_yellow_yellow.jpg	8	N	3.00732
Gorilla	Ape	Blue	43410	0.6	FisherCenter-PC	Adv Pref FC	Kwan	Phase 3_1-4.txt	22	290	2	None	3000	White	Scattered	117_shovel_blue.jpg	118_shovel_yellow.jpg	24	12	118_shovel_yellow.jpg	Yellow	0	Control	1599	CE	117_shovel_blue.jpg 118_shovel_yellow.jpg	8	N	3.20385
Gorilla	Ape	Blue	43410	0.6	FisherCenter-PC	Adv Pref FC	Kwan	Phase 3_1-4.txt	23	290	2	None	3000	White	Scattered	113_heart_yellow_blue.jpg	114_heart_yellow_yellow.jpg	19	11	113_heart_yellow_blue.jpg	Blue	1	Incongruent	1613	CE	113_heart_yellow_blue.jpg 114_heart_yellow_yellow.jpg	8	N	3.20763
Gorilla	Ape	Blue	43410	0.6	FisherCenter-PC	Adv Pref FC	Kwan	Phase 3_1-4.txt	24	290	2	None	3000	White	Scattered	115_mug_blue.jpg	116_mug_yellow.jpg	11	19	115_mug_blue.jpg	Blue	1	Control	1181	CE	115_mug_blue.jpg 116_mug_yellow.jpg	8	N	3.07225
Gorilla	Ape	Blue	43410	0.6	FisherCenter-PC	Adv Pref FC	Kwan	Phase 3_1-4.txt	25	290	2	None	3000	White	Scattered	111_heart_blue_blue.jpg	112_heart_blue_yellow.jpg	17	12	112_heart_blue_yellow.jpg	Yellow	0	Congruent	1114	CE	111_heart_blue_blue.jpg 112_heart_blue_yellow.jpg	8	N	3.04689
Gorilla	Ape	Blue	43410	0.6	FisherCenter-PC	Adv Pref FC	Kwan	Phase 3_1-4.txt	26	290	2	None	3000	White	Scattered	125_star_yellow_blue.jpg	126_star_yellow_yellow.jpg	23	15	125_star_yellow_blue.jpg	Blue	1	Incongruent	1332	CE	125_star_yellow_blue.jpg 126_star_yellow_yellow.jpg	8	N	3.1245
Gorilla	Ape	Blue	43410	0.6	FisherCenter-PC	Adv Pref FC	Kwan	Phase 3_1-4.txt	27	290	2	None	3000	White	Scattered	117_shovel_blue.jpg	118_shovel_yellow.jpg	24	25	117_shovel_blue.jpg	Blue	1	Control	1288	CE	117_shovel_blue.jpg 118_shovel_yellow.jpg	8	N	3.10992
Gorilla	Ape	Blue	43410	0.6	FisherCenter-PC	Adv Pref FC	Kwan	Phase 3_1-4.txt	28	290	2	None	3000	White	Scattered	113_heart_yellow_blue.jpg	114_heart_yellow_yellow.jpg	13	24	113_heart_yellow_blue.jpg	Blue	1	Incongruent	1137	CE	113_heart_yellow_blue.jpg 114_heart_yellow_yellow.jpg	8	N	3.05576
Gorilla	Ape	Blue	43410	0.6	FisherCenter-PC	Adv Pref FC	Kwan	Phase 3_1-4.txt	29	290	2	None	3000	White	Scattered	107_fidget_spinner_blue.jpg	108_fidget_spinner_yellow.jpg	15	19	108_fidget_spinner_yellow.jpg	Yellow	0	Control	1942	CE	107_fidget_spinner_blue.jpg 108_fidget_spinner_yellow.jpg	8	N	3.28825
Gorilla	Ape	Blue	43410	0.6	FisherCenter-PC	Adv Pref FC	Kwan	Phase 3_1-4.txt	30	290	2	None	3000	White	Scattered	123_star_blue_blue.jpg	124_star_blue_yellow.jpg	15	21	123_star_blue_blue.jpg	Blue	1	Congruent	1268	CE	123_star_blue_blue.jpg 124_star_blue_yellow.jpg	8	N	3.10312
Gorilla	Ape	Yellow	43663	0.390231	FisherCenter-PC	Adv Pref FC	Umande	Phase 3_1-1.txt	1	290	2	None	4000	White	Scattered	115_mug_blue.jpg	116_mug_yellow.jpg	21	15	116_mug_yellow.jpg	Yellow	1	Control	1915	JL	115_mug_blue.jpg 116_mug_yellow.jpg	1	N	3.28217
Gorilla	Ape	Yellow	43663	0.390301	FisherCenter-PC	Adv Pref FC	Umande	Phase 3_1-1.txt	2	290	2	None	4000	White	Scattered	125_star_yellow_blue.jpg	126_star_yellow_yellow.jpg	25	17	125_star_yellow_blue.jpg	Blue	0	Congruent	1913	JL	125_star_yellow_blue.jpg 126_star_yellow_yellow.jpg	1	N	3.28171
Gorilla	Ape	Yellow	43663	0.39037	FisherCenter-PC	Adv Pref FC	Umande	Phase 3_1-1.txt	3	290	2	None	4000	White	Scattered	109_fork_blue.jpg	110_fork_yellow.jpg	17	19	110_fork_yellow.jpg	Yellow	1	Control	1328	JL	109_fork_blue.jpg 110_fork_yellow.jpg	1	N	3.1232
Gorilla	Ape	Yellow	43663	0.39044	FisherCenter-PC	Adv Pref FC	Umande	Phase 3_1-1.txt	4	290	2	None	4000	White	Scattered	123_star_blue_blue.jpg	124_star_blue_yellow.jpg	24	15	124_star_blue_yellow.jpg	Yellow	1	Incongruent	1815	JL	123_star_blue_blue.jpg 124_star_blue_yellow.jpg	1	N	3.25888
Gorilla	Ape	Yellow	43663	0.390509	FisherCenter-PC	Adv Pref FC	Umande	Phase 3_1-1.txt	5	290	2	None	4000	White	Scattered	105_cross_yellow_blue.jpg	106_cross_yellow_yellow.jpg	13	15	106_cross_yellow_yellow.jpg	Yellow	1	Congruent	1576	JL	105_cross_yellow_blue.jpg 106_cross_yellow_yellow.jpg	1	N	3.19756
Gorilla	Ape	Yellow	43663	0.390567	FisherCenter-PC	Adv Pref FC	Umande	Phase 3_1-1.txt	6	290	2	None	4000	White	Scattered	125_star_yellow_blue.jpg	126_star_yellow_yellow.jpg	15	21	126_star_yellow_yellow.jpg	Yellow	1	Congruent	1656	JL	125_star_yellow_blue.jpg 126_star_yellow_yellow.jpg	1	N	3.21906
Gorilla	Ape	Yellow	43663	0.390637	FisherCenter-PC	Adv Pref FC	Umande	Phase 3_1-1.txt	7	290	2	None	4000	White	Scattered	115_mug_blue.jpg	116_mug_yellow.jpg	19	22	115_mug_blue.jpg	Blue	0	Control	5689	JL	115_mug_blue.jpg 116_mug_yellow.jpg	1	N	3.75504
Gorilla	Ape	Yellow	43663	0.390752	FisherCenter-PC	Adv Pref FC	Umande	Phase 3_1-1.txt	8	290	2	None	4000	White	Scattered	111_heart_blue_blue.jpg	112_heart_blue_yellow.jpg	13	19	112_heart_blue_yellow.jpg	Yellow	1	Incongruent	1617	JL	111_heart_blue_blue.jpg 112_heart_blue_yellow.jpg	1	N	3.20871
Gorilla	Ape	Yellow	43663	0.390822	FisherCenter-PC	Adv Pref FC	Umande	Phase 3_1-1.txt	9	290	2	None	4000	White	Scattered	121_square_yellow_blue.jpg	122_square_yellow_yellow.jpg	24	17	121_square_yellow_blue.jpg	Blue	0	Congruent	3612	JL	121_square_yellow_blue.jpg 122_square_yellow_yellow.jpg	1	N	3.55775
Gorilla	Ape	Yellow	43663	0.390903	FisherCenter-PC	Adv Pref FC	Umande	Phase 3_1-1.txt	10	290	2	None	4000	White	Scattered	101_bicycle_blue.JPG	102_bicycle_yellow.JPG	20	23	102_bicycle_yellow.JPG	Yellow	1	Control	1018	JL	101_bicycle_blue.JPG 102_bicycle_yellow.JPG	1	N	3.00775
Gorilla	Ape	Yellow	43663	0.390961	FisherCenter-PC	Adv Pref FC	Umande	Phase 3_1-1.txt	11	290	2	None	4000	White	Scattered	105_cross_yellow_blue.jpg	106_cross_yellow_yellow.jpg	20	11	105_cross_yellow_blue.jpg	Blue	0	Congruent	2165	JL	105_cross_yellow_blue.jpg 106_cross_yellow_yellow.jpg	1	N	3.33546
Gorilla	Ape	Yellow	43663	0.391042	FisherCenter-PC	Adv Pref FC	Umande	Phase 3_1-1.txt	12	290	2	None	4000	White	Scattered	107_fidget_spinner_blue.jpg	108_fidget_spinner_yellow.jpg	21	25	108_fidget_spinner_yellow.jpg	Yellow	1	Control	3382	JL	107_fidget_spinner_blue.jpg 108_fidget_spinner_yellow.jpg	1	N	3.52917
Gorilla	Ape	Yellow	43663	0.391123	FisherCenter-PC	Adv Pref FC	Umande	Phase 3_1-1.txt	13	290	2	None	4000	White	Scattered	125_star_yellow_blue.jpg	126_star_yellow_yellow.jpg	23	22	125_star_yellow_blue.jpg	Blue	0	Congruent	11476	JL	125_star_yellow_blue.jpg 126_star_yellow_yellow.jpg	1	N	4.05979
Gorilla	Ape	Yellow	43663	0.391308	FisherCenter-PC	Adv Pref FC	Umande	Phase 3_1-1.txt	14	290	2	None	4000	White	Scattered	103_cross_blue_blue.JPG	104_cross_blue_yellow.JPG	17	16	104_cross_blue_yellow.JPG	Yellow	1	Incongruent	1504	JL	103_cross_blue_blue.JPG 104_cross_blue_yellow.JPG	1	N	3.17725
Gorilla	Ape	Yellow	43663	0.391366	FisherCenter-PC	Adv Pref FC	Umande	Phase 3_1-1.txt	15	290	2	None	4000	White	Scattered	109_fork_blue.jpg	110_fork_yellow.jpg	15	16	109_fork_blue.jpg	Blue	0	Control	2443	JL	109_fork_blue.jpg 110_fork_yellow.jpg	1	N	3.38792
Gorilla	Ape	Yellow	43663	0.391447	FisherCenter-PC	Adv Pref FC	Umande	Phase 3_1-1.txt	16	290	2	None	4000	White	Scattered	121_square_yellow_blue.jpg	122_square_yellow_yellow.jpg	18	24	122_square_yellow_yellow.jpg	Yellow	1	Congruent	1608	JL	121_square_yellow_blue.jpg 122_square_yellow_yellow.jpg	1	N	3.20629
Gorilla	Ape	Yellow	43663	0.391516	FisherCenter-PC	Adv Pref FC	Umande	Phase 3_1-1.txt	17	290	2	None	4000	White	Scattered	119_square_blue_blue.jpg	120_square_blue_yellow.jpg	18	23	120_square_blue_yellow.jpg	Yellow	1	Incongruent	3440	JL	119_square_blue_blue.jpg 120_square_blue_yellow.jpg	1	N	3.53656
Gorilla	Ape	Yellow	43663	0.391597	FisherCenter-PC	Adv Pref FC	Umande	Phase 3_1-1.txt	18	290	2	None	4000	White	Scattered	113_heart_yellow_blue.jpg	114_heart_yellow_yellow.jpg	23	15	113_heart_yellow_blue.jpg	Blue	0	Congruent	2992	JL	113_heart_yellow_blue.jpg 114_heart_yellow_yellow.jpg	1	N	3.47596
Gorilla	Ape	Yellow	43663	0.391678	FisherCenter-PC	Adv Pref FC	Umande	Phase 3_1-1.txt	19	290	2	None	4000	White	Scattered	117_shovel_blue.jpg	118_shovel_yellow.jpg	12	17	118_shovel_yellow.jpg	Yellow	1	Control	1105	JL	117_shovel_blue.jpg 118_shovel_yellow.jpg	1	N	3.04336
Gorilla	Ape	Yellow	43663	0.391748	FisherCenter-PC	Adv Pref FC	Umande	Phase 3_1-1.txt	20	290	2	None	4000	White	Scattered	103_cross_blue_blue.JPG	104_cross_blue_yellow.JPG	25	14	103_cross_blue_blue.JPG	Blue	0	Incongruent	2188	JL	103_cross_blue_blue.JPG 104_cross_blue_yellow.JPG	1	N	3.34005
Gorilla	Ape	Yellow	43663	0.391817	FisherCenter-PC	Adv Pref FC	Umande	Phase 3_1-1.txt	21	290	2	None	4000	White	Scattered	107_fidget_spinner_blue.jpg	108_fidget_spinner_yellow.jpg	24	12	108_fidget_spinner_yellow.jpg	Yellow	1	Control	2782	JL	107_fidget_spinner_blue.jpg 108_fidget_spinner_yellow.jpg	1	N	3.44436
Gorilla	Ape	Yellow	43663	0.391898	FisherCenter-PC	Adv Pref FC	Umande	Phase 3_1-1.txt	22	290	2	None	4000	White	Scattered	123_star_blue_blue.jpg	124_star_blue_yellow.jpg	18	25	124_star_blue_yellow.jpg	Yellow	1	Incongruent	1127	JL	123_star_blue_blue.jpg 124_star_blue_yellow.jpg	1	N	3.05192
Gorilla	Ape	Yellow	43663	0.391956	FisherCenter-PC	Adv Pref FC	Umande	Phase 3_1-1.txt	23	290	2	None	4000	White	Scattered	113_heart_yellow_blue.jpg	114_heart_yellow_yellow.jpg	17	16	113_heart_yellow_blue.jpg	Blue	0	Congruent	3662	JL	113_heart_yellow_blue.jpg 114_heart_yellow_yellow.jpg	1	N	3.56372
Gorilla	Ape	Yellow	43663	0.392049	FisherCenter-PC	Adv Pref FC	Umande	Phase 3_1-1.txt	24	290	2	None	4000	White	Scattered	119_square_blue_blue.jpg	120_square_blue_yellow.jpg	19	15	119_square_blue_blue.jpg	Blue	0	Incongruent	1677	JL	119_square_blue_blue.jpg 120_square_blue_yellow.jpg	1	N	3.22453
Gorilla	Ape	Yellow	43663	0.392118	FisherCenter-PC	Adv Pref FC	Umande	Phase 3_1-1.txt	25	290	2	None	4000	White	Scattered	117_shovel_blue.jpg	118_shovel_yellow.jpg	23	12	117_shovel_blue.jpg	Blue	0	Control	52032	JL	117_shovel_blue.jpg 118_shovel_yellow.jpg	1	Y	4.71627
Gorilla	Ape	Yellow	43663	0.392766	FisherCenter-PC	Adv Pref FC	Umande	Phase 3_1-1.txt	26	290	2	None	4000	White	Scattered	105_cross_yellow_blue.jpg	106_cross_yellow_yellow.jpg	14	21	106_cross_yellow_yellow.jpg	Yellow	1	Congruent	3113	JL	105_cross_yellow_blue.jpg 106_cross_yellow_yellow.jpg	1	N	3.49318
Gorilla	Ape	Yellow	43663	0.392847	FisherCenter-PC	Adv Pref FC	Umande	Phase 3_1-1.txt	27	290	2	None	4000	White	Scattered	123_star_blue_blue.jpg	124_star_blue_yellow.jpg	22	23	124_star_blue_yellow.jpg	Yellow	1	Incongruent	4869	JL	123_star_blue_blue.jpg 124_star_blue_yellow.jpg	1	N	3.68744
Gorilla	Ape	Yellow	43663	0.392951	FisherCenter-PC	Adv Pref FC	Umande	Phase 3_1-1.txt	28	290	2	None	4000	White	Scattered	111_heart_blue_blue.jpg	112_heart_blue_yellow.jpg	22	25	112_heart_blue_yellow.jpg	Yellow	1	Incongruent	2713	JL	111_heart_blue_blue.jpg 112_heart_blue_yellow.jpg	1	N	3.43345
Gorilla	Ape	Yellow	43663	0.393032	FisherCenter-PC	Adv Pref FC	Umande	Phase 3_1-1.txt	29	290	2	None	4000	White	Scattered	101_bicycle_blue.JPG	102_bicycle_yellow.JPG	21	15	102_bicycle_yellow.JPG	Yellow	1	Control	2504	JL	101_bicycle_blue.JPG 102_bicycle_yellow.JPG	1	N	3.39863
Gorilla	Ape	Yellow	43663	0.393102	FisherCenter-PC	Adv Pref FC	Umande	Phase 3_1-1.txt	30	290	2	None	4000	White	Scattered	103_cross_blue_blue.JPG	104_cross_blue_yellow.JPG	21	18	104_cross_blue_yellow.JPG	Yellow	1	Incongruent	1077	JL	103_cross_blue_blue.JPG 104_cross_blue_yellow.JPG	1	N	3.03222
Gorilla	Ape	Yellow	43664	0.388461	FisherCenter-PC	Adv Pref FC	Umande	Phase 3_1-2.txt	1	290	2	None	4000	White	Scattered	113_heart_yellow_blue.jpg	114_heart_yellow_yellow.jpg	25	20	114_heart_yellow_yellow.jpg	Yellow	1	Congruent	2071	JL	113_heart_yellow_blue.jpg 114_heart_yellow_yellow.jpg	2	N	3.31618
Gorilla	Ape	Yellow	43664	0.388542	FisherCenter-PC	Adv Pref FC	Umande	Phase 3_1-2.txt	2	290	2	None	4000	White	Scattered	103_cross_blue_blue.JPG	104_cross_blue_yellow.JPG	18	13	103_cross_blue_blue.JPG	Blue	0	Incongruent	2797	JL	103_cross_blue_blue.JPG 104_cross_blue_yellow.JPG	2	N	3.44669
Gorilla	Ape	Yellow	43664	0.388623	FisherCenter-PC	Adv Pref FC	Umande	Phase 3_1-2.txt	3	290	2	None	4000	White	Scattered	121_square_yellow_blue.jpg	122_square_yellow_yellow.jpg	19	11	121_square_yellow_blue.jpg	Blue	0	Congruent	1705	JL	121_square_yellow_blue.jpg 122_square_yellow_yellow.jpg	2	N	3.23172
Gorilla	Ape	Yellow	43664	0.388681	FisherCenter-PC	Adv Pref FC	Umande	Phase 3_1-2.txt	4	290	2	None	4000	White	Scattered	117_shovel_blue.jpg	118_shovel_yellow.jpg	25	17	118_shovel_yellow.jpg	Yellow	1	Control	1318	JL	117_shovel_blue.jpg 118_shovel_yellow.jpg	2	N	3.11992
Gorilla	Ape	Yellow	43664	0.38875	FisherCenter-PC	Adv Pref FC	Umande	Phase 3_1-2.txt	5	290	2	None	4000	White	Scattered	123_star_blue_blue.jpg	124_star_blue_yellow.jpg	25	18	124_star_blue_yellow.jpg	Yellow	1	Incongruent	2817	JL	123_star_blue_blue.jpg 124_star_blue_yellow.jpg	2	N	3.44979
Gorilla	Ape	Yellow	43664	0.388831	FisherCenter-PC	Adv Pref FC	Umande	Phase 3_1-2.txt	6	290	2	None	4000	White	Scattered	109_fork_blue.jpg	110_fork_yellow.jpg	20	16	109_fork_blue.jpg	Blue	0	Control	4152	JL	109_fork_blue.jpg 110_fork_yellow.jpg	2	N	3.61826
Gorilla	Ape	Yellow	43664	0.388924	FisherCenter-PC	Adv Pref FC	Umande	Phase 3_1-2.txt	7	290	2	None	4000	White	Scattered	121_square_yellow_blue.jpg	122_square_yellow_yellow.jpg	18	25	121_square_yellow_blue.jpg	Blue	0	Congruent	1624	JL	121_square_yellow_blue.jpg 122_square_yellow_yellow.jpg	2	N	3.21059
Gorilla	Ape	Yellow	43664	0.388993	FisherCenter-PC	Adv Pref FC	Umande	Phase 3_1-2.txt	8	290	2	None	4000	White	Scattered	111_heart_blue_blue.jpg	112_heart_blue_yellow.jpg	21	25	112_heart_blue_yellow.jpg	Yellow	1	Incongruent	2628	JL	111_heart_blue_blue.jpg 112_heart_blue_yellow.jpg	2	N	3.41963
Gorilla	Ape	Yellow	43664	0.389062	FisherCenter-PC	Adv Pref FC	Umande	Phase 3_1-2.txt	9	290	2	None	4000	White	Scattered	125_star_yellow_blue.jpg	126_star_yellow_yellow.jpg	20	11	125_star_yellow_blue.jpg	Blue	0	Congruent	4589	JL	125_star_yellow_blue.jpg 126_star_yellow_yellow.jpg	2	N	3.66172
Gorilla	Ape	Yellow	43664	0.389167	FisherCenter-PC	Adv Pref FC	Umande	Phase 3_1-2.txt	10	290	2	None	4000	White	Scattered	107_fidget_spinner_blue.jpg	108_fidget_spinner_yellow.jpg	25	18	108_fidget_spinner_yellow.jpg	Yellow	1	Control	2280	JL	107_fidget_spinner_blue.jpg 108_fidget_spinner_yellow.jpg	2	N	3.35793
Gorilla	Ape	Yellow	43664	0.389248	FisherCenter-PC	Adv Pref FC	Umande	Phase 3_1-2.txt	11	290	2	None	4000	White	Scattered	121_square_yellow_blue.jpg	122_square_yellow_yellow.jpg	18	25	121_square_yellow_blue.jpg	Blue	0	Congruent	5217	JL	121_square_yellow_blue.jpg 122_square_yellow_yellow.jpg	2	N	3.71742
Gorilla	Ape	Yellow	43664	0.389352	FisherCenter-PC	Adv Pref FC	Umande	Phase 3_1-2.txt	12	290	2	None	4000	White	Scattered	111_heart_blue_blue.jpg	112_heart_blue_yellow.jpg	13	14	112_heart_blue_yellow.jpg	Yellow	1	Incongruent	2988	JL	111_heart_blue_blue.jpg 112_heart_blue_yellow.jpg	2	N	3.47538
Gorilla	Ape	Yellow	43664	0.389433	FisherCenter-PC	Adv Pref FC	Umande	Phase 3_1-2.txt	13	290	2	None	4000	White	Scattered	119_square_blue_blue.jpg	120_square_blue_yellow.jpg	21	13	119_square_blue_blue.jpg	Blue	0	Incongruent	1530	JL	119_square_blue_blue.jpg 120_square_blue_yellow.jpg	2	N	3.18469
Gorilla	Ape	Yellow	43664	0.389502	FisherCenter-PC	Adv Pref FC	Umande	Phase 3_1-2.txt	14	290	2	None	4000	White	Scattered	113_heart_yellow_blue.jpg	114_heart_yellow_yellow.jpg	18	19	114_heart_yellow_yellow.jpg	Yellow	1	Congruent	1579	JL	113_heart_yellow_blue.jpg 114_heart_yellow_yellow.jpg	2	N	3.19838
Gorilla	Ape	Yellow	43664	0.38956	FisherCenter-PC	Adv Pref FC	Umande	Phase 3_1-2.txt	15	290	2	None	4000	White	Scattered	109_fork_blue.jpg	110_fork_yellow.jpg	13	18	110_fork_yellow.jpg	Yellow	1	Control	4521	JL	109_fork_blue.jpg 110_fork_yellow.jpg	2	N	3.65523
Gorilla	Ape	Yellow	43664	0.389664	FisherCenter-PC	Adv Pref FC	Umande	Phase 3_1-2.txt	16	290	2	None	4000	White	Scattered	111_heart_blue_blue.jpg	112_heart_blue_yellow.jpg	21	23	112_heart_blue_yellow.jpg	Yellow	1	Incongruent	1711	JL	111_heart_blue_blue.jpg 112_heart_blue_yellow.jpg	2	N	3.23325
Gorilla	Ape	Yellow	43664	0.389734	FisherCenter-PC	Adv Pref FC	Umande	Phase 3_1-2.txt	17	290	2	None	4000	White	Scattered	103_cross_blue_blue.JPG	104_cross_blue_yellow.JPG	16	19	104_cross_blue_yellow.JPG	Yellow	1	Incongruent	2998	JL	103_cross_blue_blue.JPG 104_cross_blue_yellow.JPG	2	N	3.47683
Gorilla	Ape	Yellow	43664	0.389815	FisherCenter-PC	Adv Pref FC	Umande	Phase 3_1-2.txt	18	290	2	None	4000	White	Scattered	101_bicycle_blue.JPG	102_bicycle_yellow.JPG	17	12	102_bicycle_yellow.JPG	Yellow	1	Control	6614	JL	101_bicycle_blue.JPG 102_bicycle_yellow.JPG	2	N	3.82046
Gorilla	Ape	Yellow	43664	0.389942	FisherCenter-PC	Adv Pref FC	Umande	Phase 3_1-2.txt	19	290	2	None	4000	White	Scattered	105_cross_yellow_blue.jpg	106_cross_yellow_yellow.jpg	12	20	105_cross_yellow_blue.jpg	Blue	0	Congruent	2559	JL	105_cross_yellow_blue.jpg 106_cross_yellow_yellow.jpg	2	N	3.40807
Gorilla	Ape	Yellow	43664	0.390012	FisherCenter-PC	Adv Pref FC	Umande	Phase 3_1-2.txt	20	290	2	None	4000	White	Scattered	117_shovel_blue.jpg	118_shovel_yellow.jpg	20	22	118_shovel_yellow.jpg	Yellow	1	Control	1347	JL	117_shovel_blue.jpg 118_shovel_yellow.jpg	2	N	3.12937
Gorilla	Ape	Yellow	43664	0.390081	FisherCenter-PC	Adv Pref FC	Umande	Phase 3_1-2.txt	21	290	2	None	4000	White	Scattered	125_star_yellow_blue.jpg	126_star_yellow_yellow.jpg	23	20	125_star_yellow_blue.jpg	Blue	0	Congruent	3074	JL	125_star_yellow_blue.jpg 126_star_yellow_yellow.jpg	2	N	3.4877
Gorilla	Ape	Yellow	43664	0.390162	FisherCenter-PC	Adv Pref FC	Umande	Phase 3_1-2.txt	22	290	2	None	4000	White	Scattered	101_bicycle_blue.JPG	102_bicycle_yellow.JPG	12	18	102_bicycle_yellow.JPG	Yellow	1	Control	1320	JL	101_bicycle_blue.JPG 102_bicycle_yellow.JPG	2	N	3.12057
Gorilla	Ape	Yellow	43664	0.39022	FisherCenter-PC	Adv Pref FC	Umande	Phase 3_1-2.txt	23	290	2	None	4000	White	Scattered	113_heart_yellow_blue.jpg	114_heart_yellow_yellow.jpg	13	22	113_heart_yellow_blue.jpg	Blue	0	Congruent	1263	JL	113_heart_yellow_blue.jpg 114_heart_yellow_yellow.jpg	2	N	3.1014
Gorilla	Ape	Yellow	43664	0.390289	FisherCenter-PC	Adv Pref FC	Umande	Phase 3_1-2.txt	24	290	2	None	4000	White	Scattered	119_square_blue_blue.jpg	120_square_blue_yellow.jpg	18	20	120_square_blue_yellow.jpg	Yellow	1	Incongruent	2019	JL	119_square_blue_blue.jpg 120_square_blue_yellow.jpg	2	N	3.30514
Gorilla	Ape	Yellow	43664	0.390359	FisherCenter-PC	Adv Pref FC	Umande	Phase 3_1-2.txt	25	290	2	None	4000	White	Scattered	115_mug_blue.jpg	116_mug_yellow.jpg	17	24	116_mug_yellow.jpg	Yellow	1	Control	1480	JL	115_mug_blue.jpg 116_mug_yellow.jpg	2	N	3.17026
Gorilla	Ape	Yellow	43664	0.390417	FisherCenter-PC	Adv Pref FC	Umande	Phase 3_1-2.txt	26	290	2	None	4000	White	Scattered	123_star_blue_blue.jpg	124_star_blue_yellow.jpg	12	23	124_star_blue_yellow.jpg	Yellow	1	Incongruent	1445	JL	123_star_blue_blue.jpg 124_star_blue_yellow.jpg	2	N	3.15987
Gorilla	Ape	Yellow	43664	0.390486	FisherCenter-PC	Adv Pref FC	Umande	Phase 3_1-2.txt	27	290	2	None	4000	White	Scattered	105_cross_yellow_blue.jpg	106_cross_yellow_yellow.jpg	22	14	105_cross_yellow_blue.jpg	Blue	0	Congruent	4125	JL	105_cross_yellow_blue.jpg 106_cross_yellow_yellow.jpg	2	N	3.61542
Gorilla	Ape	Yellow	43664	0.390579	FisherCenter-PC	Adv Pref FC	Umande	Phase 3_1-2.txt	28	290	2	None	4000	White	Scattered	107_fidget_spinner_blue.jpg	108_fidget_spinner_yellow.jpg	13	20	108_fidget_spinner_yellow.jpg	Yellow	1	Control	1394	JL	107_fidget_spinner_blue.jpg 108_fidget_spinner_yellow.jpg	2	N	3.14426
Gorilla	Ape	Yellow	43664	0.390648	FisherCenter-PC	Adv Pref FC	Umande	Phase 3_1-2.txt	29	290	2	None	4000	White	Scattered	119_square_blue_blue.jpg	120_square_blue_yellow.jpg	18	22	119_square_blue_blue.jpg	Blue	0	Incongruent	11228	JL	119_square_blue_blue.jpg 120_square_blue_yellow.jpg	2	N	4.0503
Gorilla	Ape	Yellow	43664	0.390822	FisherCenter-PC	Adv Pref FC	Umande	Phase 3_1-2.txt	30	290	2	None	4000	White	Scattered	115_mug_blue.jpg	116_mug_yellow.jpg	13	25	116_mug_yellow.jpg	Yellow	1	Control	2752	JL	115_mug_blue.jpg 116_mug_yellow.jpg	2	N	3.43965
Gorilla	Ape	Yellow	43665	0.390174	FisherCenter-PC	Adv Pref FC	Umande	Phase 3_1-3.txt	1	290	2	None	4000	White	Scattered	123_star_blue_blue.jpg	124_star_blue_yellow.jpg	11	18	124_star_blue_yellow.jpg	Yellow	1	Incongruent	1841	JL	123_star_blue_blue.jpg 124_star_blue_yellow.jpg	3	N	3.26505
Gorilla	Ape	Yellow	43665	0.390255	FisherCenter-PC	Adv Pref FC	Umande	Phase 3_1-3.txt	2	290	2	None	4000	White	Scattered	115_mug_blue.jpg	116_mug_yellow.jpg	25	11	115_mug_blue.jpg	Blue	0	Control	2048	JL	115_mug_blue.jpg 116_mug_yellow.jpg	3	N	3.31133
Gorilla	Ape	Yellow	43665	0.390324	FisherCenter-PC	Adv Pref FC	Umande	Phase 3_1-3.txt	3	290	2	None	4000	White	Scattered	105_cross_yellow_blue.jpg	106_cross_yellow_yellow.jpg	22	13	105_cross_yellow_blue.jpg	Blue	0	Congruent	2935	JL	105_cross_yellow_blue.jpg 106_cross_yellow_yellow.jpg	3	N	3.46761
Gorilla	Ape	Yellow	43665	0.390405	FisherCenter-PC	Adv Pref FC	Umande	Phase 3_1-3.txt	4	290	2	None	4000	White	Scattered	109_fork_blue.jpg	110_fork_yellow.jpg	14	13	109_fork_blue.jpg	Blue	0	Control	1541	JL	109_fork_blue.jpg 110_fork_yellow.jpg	3	N	3.1878
Gorilla	Ape	Yellow	43665	0.390463	FisherCenter-PC	Adv Pref FC	Umande	Phase 3_1-3.txt	5	290	2	None	4000	White	Scattered	123_star_blue_blue.jpg	124_star_blue_yellow.jpg	25	18	123_star_blue_blue.jpg	Blue	0	Incongruent	1828	JL	123_star_blue_blue.jpg 124_star_blue_yellow.jpg	3	N	3.26198
Gorilla	Ape	Yellow	43665	0.390532	FisherCenter-PC	Adv Pref FC	Umande	Phase 3_1-3.txt	6	290	2	None	4000	White	Scattered	113_heart_yellow_blue.jpg	114_heart_yellow_yellow.jpg	19	13	113_heart_yellow_blue.jpg	Blue	0	Congruent	1430	JL	113_heart_yellow_blue.jpg 114_heart_yellow_yellow.jpg	3	N	3.15534
Gorilla	Ape	Yellow	43665	0.390602	FisherCenter-PC	Adv Pref FC	Umande	Phase 3_1-3.txt	7	290	2	None	4000	White	Scattered	117_shovel_blue.jpg	118_shovel_yellow.jpg	13	15	118_shovel_yellow.jpg	Yellow	1	Control	1640	JL	117_shovel_blue.jpg 118_shovel_yellow.jpg	3	N	3.21484
Gorilla	Ape	Yellow	43665	0.390671	FisherCenter-PC	Adv Pref FC	Umande	Phase 3_1-3.txt	8	290	2	None	4000	White	Scattered	125_star_yellow_blue.jpg	126_star_yellow_yellow.jpg	19	25	126_star_yellow_yellow.jpg	Yellow	1	Congruent	1892	JL	125_star_yellow_blue.jpg 126_star_yellow_yellow.jpg	3	N	3.27692
Gorilla	Ape	Yellow	43665	0.390741	FisherCenter-PC	Adv Pref FC	Umande	Phase 3_1-3.txt	9	290	2	None	4000	White	Scattered	109_fork_blue.jpg	110_fork_yellow.jpg	21	15	110_fork_yellow.jpg	Yellow	1	Control	3817	JL	109_fork_blue.jpg 110_fork_yellow.jpg	3	N	3.58172
Gorilla	Ape	Yellow	43665	0.390833	FisherCenter-PC	Adv Pref FC	Umande	Phase 3_1-3.txt	10	290	2	None	4000	White	Scattered	113_heart_yellow_blue.jpg	114_heart_yellow_yellow.jpg	14	25	114_heart_yellow_yellow.jpg	Yellow	1	Congruent	2145	JL	113_heart_yellow_blue.jpg 114_heart_yellow_yellow.jpg	3	N	3.33143
Gorilla	Ape	Yellow	43665	0.390903	FisherCenter-PC	Adv Pref FC	Umande	Phase 3_1-3.txt	11	290	2	None	4000	White	Scattered	111_heart_blue_blue.jpg	112_heart_blue_yellow.jpg	22	12	111_heart_blue_blue.jpg	Blue	0	Incongruent	2693	JL	111_heart_blue_blue.jpg 112_heart_blue_yellow.jpg	3	N	3.43024
Gorilla	Ape	Yellow	43665	0.390984	FisherCenter-PC	Adv Pref FC	Umande	Phase 3_1-3.txt	12	290	2	None	4000	White	Scattered	119_square_blue_blue.jpg	120_square_blue_yellow.jpg	12	23	119_square_blue_blue.jpg	Blue	0	Incongruent	1874	JL	119_square_blue_blue.jpg 120_square_blue_yellow.jpg	3	N	3.27277
Gorilla	Ape	Yellow	43665	0.391053	FisherCenter-PC	Adv Pref FC	Umande	Phase 3_1-3.txt	13	290	2	None	4000	White	Scattered	105_cross_yellow_blue.jpg	106_cross_yellow_yellow.jpg	21	20	105_cross_yellow_blue.jpg	Blue	0	Congruent	2483	JL	105_cross_yellow_blue.jpg 106_cross_yellow_yellow.jpg	3	N	3.39498
Gorilla	Ape	Yellow	43665	0.391123	FisherCenter-PC	Adv Pref FC	Umande	Phase 3_1-3.txt	14	290	2	None	4000	White	Scattered	101_bicycle_blue.JPG	102_bicycle_yellow.JPG	14	13	101_bicycle_blue.JPG	Blue	0	Control	1493	JL	101_bicycle_blue.JPG 102_bicycle_yellow.JPG	3	N	3.17406
Gorilla	Ape	Yellow	43665	0.391192	FisherCenter-PC	Adv Pref FC	Umande	Phase 3_1-3.txt	15	290	2	None	4000	White	Scattered	119_square_blue_blue.jpg	120_square_blue_yellow.jpg	18	15	120_square_blue_yellow.jpg	Yellow	1	Incongruent	1424	JL	119_square_blue_blue.jpg 120_square_blue_yellow.jpg	3	N	3.15351
Gorilla	Ape	Yellow	43665	0.39125	FisherCenter-PC	Adv Pref FC	Umande	Phase 3_1-3.txt	16	290	2	None	4000	White	Scattered	105_cross_yellow_blue.jpg	106_cross_yellow_yellow.jpg	24	21	105_cross_yellow_blue.jpg	Blue	0	Congruent	3685	JL	105_cross_yellow_blue.jpg 106_cross_yellow_yellow.jpg	3	N	3.56644
Gorilla	Ape	Yellow	43665	0.391343	FisherCenter-PC	Adv Pref FC	Umande	Phase 3_1-3.txt	17	290	2	None	4000	White	Scattered	103_cross_blue_blue.JPG	104_cross_blue_yellow.JPG	17	11	104_cross_blue_yellow.JPG	Yellow	1	Incongruent	1443	JL	103_cross_blue_blue.JPG 104_cross_blue_yellow.JPG	3	N	3.15927
Gorilla	Ape	Yellow	43665	0.391412	FisherCenter-PC	Adv Pref FC	Umande	Phase 3_1-3.txt	18	290	2	None	4000	White	Scattered	115_mug_blue.jpg	116_mug_yellow.jpg	13	25	116_mug_yellow.jpg	Yellow	1	Control	1387	JL	115_mug_blue.jpg 116_mug_yellow.jpg	3	N	3.14208
Gorilla	Ape	Yellow	43665	0.39147	FisherCenter-PC	Adv Pref FC	Umande	Phase 3_1-3.txt	19	290	2	None	4000	White	Scattered	125_star_yellow_blue.jpg	126_star_yellow_yellow.jpg	19	13	125_star_yellow_blue.jpg	Blue	0	Congruent	1969	JL	125_star_yellow_blue.jpg 126_star_yellow_yellow.jpg	3	N	3.29425
Gorilla	Ape	Yellow	43665	0.391539	FisherCenter-PC	Adv Pref FC	Umande	Phase 3_1-3.txt	20	290	2	None	4000	White	Scattered	107_fidget_spinner_blue.jpg	108_fidget_spinner_yellow.jpg	21	20	107_fidget_spinner_blue.jpg	Blue	0	Control	1787	JL	107_fidget_spinner_blue.jpg 108_fidget_spinner_yellow.jpg	3	N	3.25212
Gorilla	Ape	Yellow	43665	0.391609	FisherCenter-PC	Adv Pref FC	Umande	Phase 3_1-3.txt	21	290	2	None	4000	White	Scattered	123_star_blue_blue.jpg	124_star_blue_yellow.jpg	20	22	124_star_blue_yellow.jpg	Yellow	1	Incongruent	1593	JL	123_star_blue_blue.jpg 124_star_blue_yellow.jpg	3	N	3.20222
Gorilla	Ape	Yellow	43665	0.391678	FisherCenter-PC	Adv Pref FC	Umande	Phase 3_1-3.txt	22	290	2	None	4000	White	Scattered	101_bicycle_blue.JPG	102_bicycle_yellow.JPG	17	16	101_bicycle_blue.JPG	Blue	0	Control	2365	JL	101_bicycle_blue.JPG 102_bicycle_yellow.JPG	3	N	3.37383
Gorilla	Ape	Yellow	43665	0.391748	FisherCenter-PC	Adv Pref FC	Umande	Phase 3_1-3.txt	23	290	2	None	4000	White	Scattered	121_square_yellow_blue.jpg	122_square_yellow_yellow.jpg	14	22	122_square_yellow_yellow.jpg	Yellow	1	Congruent	1379	JL	121_square_yellow_blue.jpg 122_square_yellow_yellow.jpg	3	N	3.13956
Gorilla	Ape	Yellow	43665	0.391817	FisherCenter-PC	Adv Pref FC	Umande	Phase 3_1-3.txt	24	290	2	None	4000	White	Scattered	111_heart_blue_blue.jpg	112_heart_blue_yellow.jpg	11	25	112_heart_blue_yellow.jpg	Yellow	1	Incongruent	1181	JL	111_heart_blue_blue.jpg 112_heart_blue_yellow.jpg	3	N	3.07225
Gorilla	Ape	Yellow	43665	0.391875	FisherCenter-PC	Adv Pref FC	Umande	Phase 3_1-3.txt	25	290	2	None	4000	White	Scattered	107_fidget_spinner_blue.jpg	108_fidget_spinner_yellow.jpg	22	16	107_fidget_spinner_blue.jpg	Blue	0	Control	1095	JL	107_fidget_spinner_blue.jpg 108_fidget_spinner_yellow.jpg	3	N	3.03941
Gorilla	Ape	Yellow	43665	0.391933	FisherCenter-PC	Adv Pref FC	Umande	Phase 3_1-3.txt	26	290	2	None	4000	White	Scattered	103_cross_blue_blue.JPG	104_cross_blue_yellow.JPG	21	12	103_cross_blue_blue.JPG	Blue	0	Incongruent	1725	JL	103_cross_blue_blue.JPG 104_cross_blue_yellow.JPG	3	N	3.23679
Gorilla	Ape	Yellow	43665	0.392002	FisherCenter-PC	Adv Pref FC	Umande	Phase 3_1-3.txt	27	290	2	None	4000	White	Scattered	125_star_yellow_blue.jpg	126_star_yellow_yellow.jpg	16	25	126_star_yellow_yellow.jpg	Yellow	1	Congruent	1866	JL	125_star_yellow_blue.jpg 126_star_yellow_yellow.jpg	3	N	3.27091
Gorilla	Ape	Yellow	43665	0.392072	FisherCenter-PC	Adv Pref FC	Umande	Phase 3_1-3.txt	28	290	2	None	4000	White	Scattered	117_shovel_blue.jpg	118_shovel_yellow.jpg	16	11	117_shovel_blue.jpg	Blue	0	Control	3949	JL	117_shovel_blue.jpg 118_shovel_yellow.jpg	3	N	3.59649
Gorilla	Ape	Yellow	43665	0.392164	FisherCenter-PC	Adv Pref FC	Umande	Phase 3_1-3.txt	29	290	2	None	4000	White	Scattered	121_square_yellow_blue.jpg	122_square_yellow_yellow.jpg	18	22	122_square_yellow_yellow.jpg	Yellow	1	Congruent	1339	JL	121_square_yellow_blue.jpg 122_square_yellow_yellow.jpg	3	N	3.12678
Gorilla	Ape	Yellow	43665	0.392234	FisherCenter-PC	Adv Pref FC	Umande	Phase 3_1-3.txt	30	290	2	None	4000	White	Scattered	103_cross_blue_blue.JPG	104_cross_blue_yellow.JPG	14	20	104_cross_blue_yellow.JPG	Yellow	1	Incongruent	1453	JL	103_cross_blue_blue.JPG 104_cross_blue_yellow.JPG	3	N	3.16227
Gorilla	Ape	Yellow	43669	0.388715	FisherCenter-PC	Adv Pref FC	Umande	Phase 3_1-4.txt	1	290	2	None	4000	White	Scattered	119_square_blue_blue.jpg	120_square_blue_yellow.jpg	11	19	120_square_blue_yellow.jpg	Yellow	1	Incongruent	1368	JL	119_square_blue_blue.jpg 120_square_blue_yellow.jpg	4	N	3.13609
Gorilla	Ape	Yellow	43669	0.388773	FisherCenter-PC	Adv Pref FC	Umande	Phase 3_1-4.txt	2	290	2	None	4000	White	Scattered	125_star_yellow_blue.jpg	126_star_yellow_yellow.jpg	17	25	125_star_yellow_blue.jpg	Blue	0	Congruent	4858	JL	125_star_yellow_blue.jpg 126_star_yellow_yellow.jpg	4	N	3.68646
Gorilla	Ape	Yellow	43669	0.388877	FisherCenter-PC	Adv Pref FC	Umande	Phase 3_1-4.txt	3	290	2	None	4000	White	Scattered	111_heart_blue_blue.jpg	112_heart_blue_yellow.jpg	23	16	111_heart_blue_blue.jpg	Blue	0	Incongruent	2095	JL	111_heart_blue_blue.jpg 112_heart_blue_yellow.jpg	4	N	3.32118
Gorilla	Ape	Yellow	43669	0.388958	FisherCenter-PC	Adv Pref FC	Umande	Phase 3_1-4.txt	4	290	2	None	4000	White	Scattered	105_cross_yellow_blue.jpg	106_cross_yellow_yellow.jpg	12	15	106_cross_yellow_yellow.jpg	Yellow	1	Congruent	1831	JL	105_cross_yellow_blue.jpg 106_cross_yellow_yellow.jpg	4	N	3.26269
Gorilla	Ape	Yellow	43669	0.389016	FisherCenter-PC	Adv Pref FC	Umande	Phase 3_1-4.txt	5	290	2	None	4000	White	Scattered	115_mug_blue.jpg	116_mug_yellow.jpg	16	22	115_mug_blue.jpg	Blue	0	Control	6899	JL	115_mug_blue.jpg 116_mug_yellow.jpg	4	N	3.83879
Gorilla	Ape	Yellow	43669	0.389144	FisherCenter-PC	Adv Pref FC	Umande	Phase 3_1-4.txt	6	290	2	None	4000	White	Scattered	113_heart_yellow_blue.jpg	114_heart_yellow_yellow.jpg	19	25	114_heart_yellow_yellow.jpg	Yellow	1	Congruent	1877	JL	113_heart_yellow_blue.jpg 114_heart_yellow_yellow.jpg	4	N	3.27346
Gorilla	Ape	Yellow	43669	0.389213	FisherCenter-PC	Adv Pref FC	Umande	Phase 3_1-4.txt	7	290	2	None	4000	White	Scattered	103_cross_blue_blue.JPG	104_cross_blue_yellow.JPG	20	21	104_cross_blue_yellow.JPG	Yellow	1	Incongruent	2366	JL	103_cross_blue_blue.JPG 104_cross_blue_yellow.JPG	4	N	3.37401
Gorilla	Ape	Yellow	43669	0.389294	FisherCenter-PC	Adv Pref FC	Umande	Phase 3_1-4.txt	8	290	2	None	4000	White	Scattered	101_bicycle_blue.JPG	102_bicycle_yellow.JPG	14	13	102_bicycle_yellow.JPG	Yellow	1	Control	1474	JL	101_bicycle_blue.JPG 102_bicycle_yellow.JPG	4	N	3.1685
Gorilla	Ape	Yellow	43669	0.389363	FisherCenter-PC	Adv Pref FC	Umande	Phase 3_1-4.txt	9	290	2	None	4000	White	Scattered	103_cross_blue_blue.JPG	104_cross_blue_yellow.JPG	20	11	104_cross_blue_yellow.JPG	Yellow	1	Incongruent	1915	JL	103_cross_blue_blue.JPG 104_cross_blue_yellow.JPG	4	N	3.28217
Gorilla	Ape	Yellow	43669	0.389433	FisherCenter-PC	Adv Pref FC	Umande	Phase 3_1-4.txt	10	290	2	None	4000	White	Scattered	109_fork_blue.jpg	110_fork_yellow.jpg	25	18	109_fork_blue.jpg	Blue	0	Control	1600	JL	109_fork_blue.jpg 110_fork_yellow.jpg	4	N	3.20412
Gorilla	Ape	Yellow	43669	0.389491	FisherCenter-PC	Adv Pref FC	Umande	Phase 3_1-4.txt	11	290	2	None	4000	White	Scattered	123_star_blue_blue.jpg	124_star_blue_yellow.jpg	22	25	123_star_blue_blue.jpg	Blue	0	Incongruent	1548	JL	123_star_blue_blue.jpg 124_star_blue_yellow.jpg	4	N	3.18977
Gorilla	Ape	Yellow	43669	0.38956	FisherCenter-PC	Adv Pref FC	Umande	Phase 3_1-4.txt	12	290	2	None	4000	White	Scattered	105_cross_yellow_blue.jpg	106_cross_yellow_yellow.jpg	19	14	105_cross_yellow_blue.jpg	Blue	0	Congruent	1266	JL	105_cross_yellow_blue.jpg 106_cross_yellow_yellow.jpg	4	N	3.10243
Gorilla	Ape	Yellow	43669	0.389618	FisherCenter-PC	Adv Pref FC	Umande	Phase 3_1-4.txt	13	290	2	None	4000	White	Scattered	101_bicycle_blue.JPG	102_bicycle_yellow.JPG	17	25	102_bicycle_yellow.JPG	Yellow	1	Control	1891	JL	101_bicycle_blue.JPG 102_bicycle_yellow.JPG	4	N	3.27669
Gorilla	Ape	Yellow	43669	0.389688	FisherCenter-PC	Adv Pref FC	Umande	Phase 3_1-4.txt	14	290	2	None	4000	White	Scattered	121_square_yellow_blue.jpg	122_square_yellow_yellow.jpg	23	18	121_square_yellow_blue.jpg	Blue	0	Congruent	1261	JL	121_square_yellow_blue.jpg 122_square_yellow_yellow.jpg	4	N	3.10072
Gorilla	Ape	Yellow	43669	0.389757	FisherCenter-PC	Adv Pref FC	Umande	Phase 3_1-4.txt	15	290	2	None	4000	White	Scattered	119_square_blue_blue.jpg	120_square_blue_yellow.jpg	11	19	120_square_blue_yellow.jpg	Yellow	1	Incongruent	1762	JL	119_square_blue_blue.jpg 120_square_blue_yellow.jpg	4	N	3.24601
Gorilla	Ape	Yellow	43669	0.389826	FisherCenter-PC	Adv Pref FC	Umande	Phase 3_1-4.txt	16	290	2	None	4000	White	Scattered	121_square_yellow_blue.jpg	122_square_yellow_yellow.jpg	23	17	121_square_yellow_blue.jpg	Blue	0	Congruent	1661	JL	121_square_yellow_blue.jpg 122_square_yellow_yellow.jpg	4	N	3.22037
Gorilla	Ape	Yellow	43669	0.389884	FisherCenter-PC	Adv Pref FC	Umande	Phase 3_1-4.txt	17	290	2	None	4000	White	Scattered	109_fork_blue.jpg	110_fork_yellow.jpg	12	25	110_fork_yellow.jpg	Yellow	1	Control	2533	JL	109_fork_blue.jpg 110_fork_yellow.jpg	4	N	3.40364
Gorilla	Ape	Yellow	43669	0.389965	FisherCenter-PC	Adv Pref FC	Umande	Phase 3_1-4.txt	18	290	2	None	4000	White	Scattered	111_heart_blue_blue.jpg	112_heart_blue_yellow.jpg	21	13	112_heart_blue_yellow.jpg	Yellow	1	Incongruent	19097	JL	111_heart_blue_blue.jpg 112_heart_blue_yellow.jpg	4	Y	4.28097
Gorilla	Ape	Yellow	43669	0.390231	FisherCenter-PC	Adv Pref FC	Umande	Phase 3_1-4.txt	19	290	2	None	4000	White	Scattered	107_fidget_spinner_blue.jpg	108_fidget_spinner_yellow.jpg	15	20	108_fidget_spinner_yellow.jpg	Yellow	1	Control	1300	JL	107_fidget_spinner_blue.jpg 108_fidget_spinner_yellow.jpg	4	N	3.11394
Gorilla	Ape	Yellow	43669	0.390301	FisherCenter-PC	Adv Pref FC	Umande	Phase 3_1-4.txt	20	290	2	None	4000	White	Scattered	119_square_blue_blue.jpg	120_square_blue_yellow.jpg	19	11	119_square_blue_blue.jpg	Blue	0	Incongruent	4722	JL	119_square_blue_blue.jpg 120_square_blue_yellow.jpg	4	N	3.67413
Gorilla	Ape	Yellow	43669	0.390394	FisherCenter-PC	Adv Pref FC	Umande	Phase 3_1-4.txt	21	290	2	None	4000	White	Scattered	121_square_yellow_blue.jpg	122_square_yellow_yellow.jpg	16	13	122_square_yellow_yellow.jpg	Yellow	1	Congruent	1532	JL	121_square_yellow_blue.jpg 122_square_yellow_yellow.jpg	4	N	3.18526
Gorilla	Ape	Yellow	43669	0.390463	FisherCenter-PC	Adv Pref FC	Umande	Phase 3_1-4.txt	22	290	2	None	4000	White	Scattered	117_shovel_blue.jpg	118_shovel_yellow.jpg	20	18	117_shovel_blue.jpg	Blue	0	Control	1103	JL	117_shovel_blue.jpg 118_shovel_yellow.jpg	4	N	3.04258
Gorilla	Ape	Yellow	43669	0.390521	FisherCenter-PC	Adv Pref FC	Umande	Phase 3_1-4.txt	23	290	2	None	4000	White	Scattered	113_heart_yellow_blue.jpg	114_heart_yellow_yellow.jpg	13	18	114_heart_yellow_yellow.jpg	Yellow	1	Congruent	1635	JL	113_heart_yellow_blue.jpg 114_heart_yellow_yellow.jpg	4	N	3.21352
Gorilla	Ape	Yellow	43669	0.39059	FisherCenter-PC	Adv Pref FC	Umande	Phase 3_1-4.txt	24	290	2	None	4000	White	Scattered	115_mug_blue.jpg	116_mug_yellow.jpg	20	22	115_mug_blue.jpg	Blue	0	Control	2639	JL	115_mug_blue.jpg 116_mug_yellow.jpg	4	N	3.42144
Gorilla	Ape	Yellow	43669	0.390671	FisherCenter-PC	Adv Pref FC	Umande	Phase 3_1-4.txt	25	290	2	None	4000	White	Scattered	111_heart_blue_blue.jpg	112_heart_blue_yellow.jpg	21	18	112_heart_blue_yellow.jpg	Yellow	1	Incongruent	1379	JL	111_heart_blue_blue.jpg 112_heart_blue_yellow.jpg	4	N	3.13956
Gorilla	Ape	Yellow	43669	0.390729	FisherCenter-PC	Adv Pref FC	Umande	Phase 3_1-4.txt	26	290	2	None	4000	White	Scattered	125_star_yellow_blue.jpg	126_star_yellow_yellow.jpg	19	12	125_star_yellow_blue.jpg	Blue	0	Congruent	1394	JL	125_star_yellow_blue.jpg 126_star_yellow_yellow.jpg	4	N	3.14426
Gorilla	Ape	Yellow	43669	0.390799	FisherCenter-PC	Adv Pref FC	Umande	Phase 3_1-4.txt	27	290	2	None	4000	White	Scattered	117_shovel_blue.jpg	118_shovel_yellow.jpg	23	18	117_shovel_blue.jpg	Blue	0	Control	2282	JL	117_shovel_blue.jpg 118_shovel_yellow.jpg	4	N	3.35832
Gorilla	Ape	Yellow	43669	0.390868	FisherCenter-PC	Adv Pref FC	Umande	Phase 3_1-4.txt	28	290	2	None	4000	White	Scattered	113_heart_yellow_blue.jpg	114_heart_yellow_yellow.jpg	17	19	114_heart_yellow_yellow.jpg	Yellow	1	Congruent	1338	JL	113_heart_yellow_blue.jpg 114_heart_yellow_yellow.jpg	4	N	3.12646
Gorilla	Ape	Yellow	43669	0.390937	FisherCenter-PC	Adv Pref FC	Umande	Phase 3_1-4.txt	29	290	2	None	4000	White	Scattered	107_fidget_spinner_blue.jpg	108_fidget_spinner_yellow.jpg	22	21	107_fidget_spinner_blue.jpg	Blue	0	Control	3588	JL	107_fidget_spinner_blue.jpg 108_fidget_spinner_yellow.jpg	4	N	3.55485
Gorilla	Ape	Yellow	43669	0.391019	FisherCenter-PC	Adv Pref FC	Umande	Phase 3_1-4.txt	30	290	2	None	4000	White	Scattered	123_star_blue_blue.jpg	124_star_blue_yellow.jpg	21	24	124_star_blue_yellow.jpg	Yellow	1	Incongruent	1362	JL	123_star_blue_blue.jpg 124_star_blue_yellow.jpg	4	N	3.13418
Gorilla	Ape	Yellow	43670	0.432211	FisherCenter-PC	Adv Pref FC	Umande	Phase 3_2-1.txt	1	290	2	None	4000	White	Scattered	113_heart_yellow_blue.jpg	114_heart_yellow_yellow.jpg	15	22	113_heart_yellow_blue.jpg	Blue	0	Congruent	1710	JL	113_heart_yellow_blue.jpg 114_heart_yellow_yellow.jpg	5	N	3.233
Gorilla	Ape	Yellow	43670	0.43228	FisherCenter-PC	Adv Pref FC	Umande	Phase 3_2-1.txt	2	290	2	None	4000	White	Scattered	103_cross_blue_blue.JPG	104_cross_blue_yellow.JPG	22	16	103_cross_blue_blue.JPG	Blue	0	Incongruent	1359	JL	103_cross_blue_blue.JPG 104_cross_blue_yellow.JPG	5	N	3.13322
Gorilla	Ape	Yellow	43670	0.432338	FisherCenter-PC	Adv Pref FC	Umande	Phase 3_2-1.txt	3	290	2	None	4000	White	Scattered	121_square_yellow_blue.jpg	122_square_yellow_yellow.jpg	17	25	122_square_yellow_yellow.jpg	Yellow	1	Congruent	1849	JL	121_square_yellow_blue.jpg 122_square_yellow_yellow.jpg	5	N	3.26694
Gorilla	Ape	Yellow	43670	0.432407	FisherCenter-PC	Adv Pref FC	Umande	Phase 3_2-1.txt	4	290	2	None	4000	White	Scattered	117_shovel_blue.jpg	118_shovel_yellow.jpg	14	15	118_shovel_yellow.jpg	Yellow	1	Control	1289	JL	117_shovel_blue.jpg 118_shovel_yellow.jpg	5	N	3.11025
Gorilla	Ape	Yellow	43670	0.432477	FisherCenter-PC	Adv Pref FC	Umande	Phase 3_2-1.txt	5	290	2	None	4000	White	Scattered	123_star_blue_blue.jpg	124_star_blue_yellow.jpg	22	11	123_star_blue_blue.jpg	Blue	0	Incongruent	1314	JL	123_star_blue_blue.jpg 124_star_blue_yellow.jpg	5	N	3.1186
Gorilla	Ape	Yellow	43670	0.432535	FisherCenter-PC	Adv Pref FC	Umande	Phase 3_2-1.txt	6	290	2	None	4000	White	Scattered	109_fork_blue.jpg	110_fork_yellow.jpg	25	17	110_fork_yellow.jpg	Yellow	1	Control	2222	JL	109_fork_blue.jpg 110_fork_yellow.jpg	5	N	3.34674
Gorilla	Ape	Yellow	43670	0.432616	FisherCenter-PC	Adv Pref FC	Umande	Phase 3_2-1.txt	7	290	2	None	4000	White	Scattered	121_square_yellow_blue.jpg	122_square_yellow_yellow.jpg	23	22	121_square_yellow_blue.jpg	Blue	0	Congruent	1119	JL	121_square_yellow_blue.jpg 122_square_yellow_yellow.jpg	5	N	3.04883
Gorilla	Ape	Yellow	43670	0.432674	FisherCenter-PC	Adv Pref FC	Umande	Phase 3_2-1.txt	8	290	2	None	4000	White	Scattered	111_heart_blue_blue.jpg	112_heart_blue_yellow.jpg	20	19	111_heart_blue_blue.jpg	Blue	0	Incongruent	1945	JL	111_heart_blue_blue.jpg 112_heart_blue_yellow.jpg	5	N	3.28892
Gorilla	Ape	Yellow	43670	0.432743	FisherCenter-PC	Adv Pref FC	Umande	Phase 3_2-1.txt	9	290	2	None	4000	White	Scattered	125_star_yellow_blue.jpg	126_star_yellow_yellow.jpg	11	14	126_star_yellow_yellow.jpg	Yellow	1	Congruent	1830	JL	125_star_yellow_blue.jpg 126_star_yellow_yellow.jpg	5	N	3.26245
Gorilla	Ape	Yellow	43670	0.432812	FisherCenter-PC	Adv Pref FC	Umande	Phase 3_2-1.txt	10	290	2	None	4000	White	Scattered	107_fidget_spinner_blue.jpg	108_fidget_spinner_yellow.jpg	20	13	107_fidget_spinner_blue.jpg	Blue	0	Control	3059	JL	107_fidget_spinner_blue.jpg 108_fidget_spinner_yellow.jpg	5	N	3.48558
Gorilla	Ape	Yellow	43670	0.432894	FisherCenter-PC	Adv Pref FC	Umande	Phase 3_2-1.txt	11	290	2	None	4000	White	Scattered	121_square_yellow_blue.jpg	122_square_yellow_yellow.jpg	13	18	121_square_yellow_blue.jpg	Blue	0	Congruent	3033	JL	121_square_yellow_blue.jpg 122_square_yellow_yellow.jpg	5	N	3.48187
Gorilla	Ape	Yellow	43670	0.432975	FisherCenter-PC	Adv Pref FC	Umande	Phase 3_2-1.txt	12	290	2	None	4000	White	Scattered	111_heart_blue_blue.jpg	112_heart_blue_yellow.jpg	23	21	111_heart_blue_blue.jpg	Blue	0	Incongruent	1649	JL	111_heart_blue_blue.jpg 112_heart_blue_yellow.jpg	5	N	3.21722
Gorilla	Ape	Yellow	43670	0.433044	FisherCenter-PC	Adv Pref FC	Umande	Phase 3_2-1.txt	13	290	2	None	4000	White	Scattered	119_square_blue_blue.jpg	120_square_blue_yellow.jpg	19	17	120_square_blue_yellow.jpg	Yellow	1	Incongruent	1573	JL	119_square_blue_blue.jpg 120_square_blue_yellow.jpg	5	N	3.19673
Gorilla	Ape	Yellow	43670	0.433113	FisherCenter-PC	Adv Pref FC	Umande	Phase 3_2-1.txt	14	290	2	None	4000	White	Scattered	113_heart_yellow_blue.jpg	114_heart_yellow_yellow.jpg	20	23	114_heart_yellow_yellow.jpg	Yellow	1	Congruent	1352	JL	113_heart_yellow_blue.jpg 114_heart_yellow_yellow.jpg	5	N	3.13098
Gorilla	Ape	Yellow	43670	0.433171	FisherCenter-PC	Adv Pref FC	Umande	Phase 3_2-1.txt	15	290	2	None	4000	White	Scattered	109_fork_blue.jpg	110_fork_yellow.jpg	18	12	109_fork_blue.jpg	Blue	0	Control	1259	JL	109_fork_blue.jpg 110_fork_yellow.jpg	5	N	3.10003
Gorilla	Ape	Yellow	43670	0.433229	FisherCenter-PC	Adv Pref FC	Umande	Phase 3_2-1.txt	16	290	2	None	4000	White	Scattered	111_heart_blue_blue.jpg	112_heart_blue_yellow.jpg	17	19	112_heart_blue_yellow.jpg	Yellow	1	Incongruent	1685	JL	111_heart_blue_blue.jpg 112_heart_blue_yellow.jpg	5	N	3.2266
Gorilla	Ape	Yellow	43670	0.433299	FisherCenter-PC	Adv Pref FC	Umande	Phase 3_2-1.txt	17	290	2	None	4000	White	Scattered	103_cross_blue_blue.JPG	104_cross_blue_yellow.JPG	21	13	104_cross_blue_yellow.JPG	Yellow	1	Incongruent	4408	JL	103_cross_blue_blue.JPG 104_cross_blue_yellow.JPG	5	N	3.64424
Gorilla	Ape	Yellow	43670	0.433403	FisherCenter-PC	Adv Pref FC	Umande	Phase 3_2-1.txt	18	290	2	None	4000	White	Scattered	101_bicycle_blue.JPG	102_bicycle_yellow.JPG	16	22	102_bicycle_yellow.JPG	Yellow	1	Control	14814	JL	101_bicycle_blue.JPG 102_bicycle_yellow.JPG	5	Y	4.17067
Gorilla	Ape	Yellow	43670	0.433623	FisherCenter-PC	Adv Pref FC	Umande	Phase 3_2-1.txt	19	290	2	None	4000	White	Scattered	105_cross_yellow_blue.jpg	106_cross_yellow_yellow.jpg	22	21	105_cross_yellow_blue.jpg	Blue	0	Congruent	2552	JL	105_cross_yellow_blue.jpg 106_cross_yellow_yellow.jpg	5	N	3.40688
Gorilla	Ape	Yellow	43670	0.433692	FisherCenter-PC	Adv Pref FC	Umande	Phase 3_2-1.txt	20	290	2	None	4000	White	Scattered	117_shovel_blue.jpg	118_shovel_yellow.jpg	17	14	118_shovel_yellow.jpg	Yellow	1	Control	1586	JL	117_shovel_blue.jpg 118_shovel_yellow.jpg	5	N	3.2003
Gorilla	Ape	Yellow	43670	0.433762	FisherCenter-PC	Adv Pref FC	Umande	Phase 3_2-1.txt	21	290	2	None	4000	White	Scattered	125_star_yellow_blue.jpg	126_star_yellow_yellow.jpg	21	17	126_star_yellow_yellow.jpg	Yellow	1	Congruent	3313	JL	125_star_yellow_blue.jpg 126_star_yellow_yellow.jpg	5	N	3.52022
Gorilla	Ape	Yellow	43670	0.433843	FisherCenter-PC	Adv Pref FC	Umande	Phase 3_2-1.txt	22	290	2	None	4000	White	Scattered	101_bicycle_blue.JPG	102_bicycle_yellow.JPG	16	21	102_bicycle_yellow.JPG	Yellow	1	Control	3641	JL	101_bicycle_blue.JPG 102_bicycle_yellow.JPG	5	N	3.56122
Gorilla	Ape	Yellow	43670	0.433935	FisherCenter-PC	Adv Pref FC	Umande	Phase 3_2-1.txt	23	290	2	None	4000	White	Scattered	113_heart_yellow_blue.jpg	114_heart_yellow_yellow.jpg	15	11	113_heart_yellow_blue.jpg	Blue	0	Congruent	2544	JL	113_heart_yellow_blue.jpg 114_heart_yellow_yellow.jpg	5	N	3.40552
Gorilla	Ape	Yellow	43670	0.434016	FisherCenter-PC	Adv Pref FC	Umande	Phase 3_2-1.txt	24	290	2	None	4000	White	Scattered	119_square_blue_blue.jpg	120_square_blue_yellow.jpg	21	14	120_square_blue_yellow.jpg	Yellow	1	Incongruent	2421	JL	119_square_blue_blue.jpg 120_square_blue_yellow.jpg	5	N	3.38399
Gorilla	Ape	Yellow	43670	0.434086	FisherCenter-PC	Adv Pref FC	Umande	Phase 3_2-1.txt	25	290	2	None	4000	White	Scattered	115_mug_blue.jpg	116_mug_yellow.jpg	25	17	116_mug_yellow.jpg	Yellow	1	Control	2967	JL	115_mug_blue.jpg 116_mug_yellow.jpg	5	N	3.47232
Gorilla	Ape	Yellow	43670	0.434167	FisherCenter-PC	Adv Pref FC	Umande	Phase 3_2-1.txt	26	290	2	None	4000	White	Scattered	123_star_blue_blue.jpg	124_star_blue_yellow.jpg	12	24	124_star_blue_yellow.jpg	Yellow	1	Incongruent	2179	JL	123_star_blue_blue.jpg 124_star_blue_yellow.jpg	5	N	3.33826
Gorilla	Ape	Yellow	43670	0.434248	FisherCenter-PC	Adv Pref FC	Umande	Phase 3_2-1.txt	27	290	2	None	4000	White	Scattered	105_cross_yellow_blue.jpg	106_cross_yellow_yellow.jpg	17	21	106_cross_yellow_yellow.jpg	Yellow	1	Congruent	3621	JL	105_cross_yellow_blue.jpg 106_cross_yellow_yellow.jpg	5	N	3.55883
Gorilla	Ape	Yellow	43670	0.434329	FisherCenter-PC	Adv Pref FC	Umande	Phase 3_2-1.txt	28	290	2	None	4000	White	Scattered	107_fidget_spinner_blue.jpg	108_fidget_spinner_yellow.jpg	24	25	108_fidget_spinner_yellow.jpg	Yellow	1	Control	1874	JL	107_fidget_spinner_blue.jpg 108_fidget_spinner_yellow.jpg	5	N	3.27277
Gorilla	Ape	Yellow	43670	0.434398	FisherCenter-PC	Adv Pref FC	Umande	Phase 3_2-1.txt	29	290	2	None	4000	White	Scattered	119_square_blue_blue.jpg	120_square_blue_yellow.jpg	16	19	120_square_blue_yellow.jpg	Yellow	1	Incongruent	2284	JL	119_square_blue_blue.jpg 120_square_blue_yellow.jpg	5	N	3.3587
Gorilla	Ape	Yellow	43670	0.434479	FisherCenter-PC	Adv Pref FC	Umande	Phase 3_2-1.txt	30	290	2	None	4000	White	Scattered	115_mug_blue.jpg	116_mug_yellow.jpg	19	12	115_mug_blue.jpg	Blue	0	Control	2272	JL	115_mug_blue.jpg 116_mug_yellow.jpg	5	N	3.35641
Gorilla	Ape	Yellow	43671	0.379954	FisherCenter-PC	Adv Pref FC	Umande	Phase 3_2-2.txt	1	290	2	None	4000	White	Scattered	115_mug_blue.jpg	116_mug_yellow.jpg	11	17	116_mug_yellow.jpg	Yellow	1	Control	2087	JL	115_mug_blue.jpg 116_mug_yellow.jpg	6	N	3.31952
Gorilla	Ape	Yellow	43671	0.380035	FisherCenter-PC	Adv Pref FC	Umande	Phase 3_2-2.txt	2	290	2	None	4000	White	Scattered	125_star_yellow_blue.jpg	126_star_yellow_yellow.jpg	11	15	125_star_yellow_blue.jpg	Blue	0	Congruent	1735	JL	125_star_yellow_blue.jpg 126_star_yellow_yellow.jpg	6	N	3.2393
Gorilla	Ape	Yellow	43671	0.380093	FisherCenter-PC	Adv Pref FC	Umande	Phase 3_2-2.txt	3	290	2	None	4000	White	Scattered	109_fork_blue.jpg	110_fork_yellow.jpg	16	21	110_fork_yellow.jpg	Yellow	1	Control	2772	JL	109_fork_blue.jpg 110_fork_yellow.jpg	6	N	3.44279
Gorilla	Ape	Yellow	43671	0.380174	FisherCenter-PC	Adv Pref FC	Umande	Phase 3_2-2.txt	4	290	2	None	4000	White	Scattered	123_star_blue_blue.jpg	124_star_blue_yellow.jpg	18	15	124_star_blue_yellow.jpg	Yellow	1	Incongruent	1956	JL	123_star_blue_blue.jpg 124_star_blue_yellow.jpg	6	N	3.29137
Gorilla	Ape	Yellow	43671	0.380243	FisherCenter-PC	Adv Pref FC	Umande	Phase 3_2-2.txt	5	290	2	None	4000	White	Scattered	105_cross_yellow_blue.jpg	106_cross_yellow_yellow.jpg	11	20	105_cross_yellow_blue.jpg	Blue	0	Congruent	1367	JL	105_cross_yellow_blue.jpg 106_cross_yellow_yellow.jpg	6	N	3.13577
Gorilla	Ape	Yellow	43671	0.380312	FisherCenter-PC	Adv Pref FC	Umande	Phase 3_2-2.txt	6	290	2	None	4000	White	Scattered	125_star_yellow_blue.jpg	126_star_yellow_yellow.jpg	16	13	125_star_yellow_blue.jpg	Blue	0	Congruent	1347	JL	125_star_yellow_blue.jpg 126_star_yellow_yellow.jpg	6	N	3.12937
Gorilla	Ape	Yellow	43671	0.38037	FisherCenter-PC	Adv Pref FC	Umande	Phase 3_2-2.txt	7	290	2	None	4000	White	Scattered	115_mug_blue.jpg	116_mug_yellow.jpg	25	14	116_mug_yellow.jpg	Yellow	1	Control	2875	JL	115_mug_blue.jpg 116_mug_yellow.jpg	6	N	3.45864
Gorilla	Ape	Yellow	43671	0.380451	FisherCenter-PC	Adv Pref FC	Umande	Phase 3_2-2.txt	8	290	2	None	4000	White	Scattered	111_heart_blue_blue.jpg	112_heart_blue_yellow.jpg	15	14	111_heart_blue_blue.jpg	Blue	0	Incongruent	1363	JL	111_heart_blue_blue.jpg 112_heart_blue_yellow.jpg	6	N	3.1345
Gorilla	Ape	Yellow	43671	0.380521	FisherCenter-PC	Adv Pref FC	Umande	Phase 3_2-2.txt	9	290	2	None	4000	White	Scattered	121_square_yellow_blue.jpg	122_square_yellow_yellow.jpg	25	22	122_square_yellow_yellow.jpg	Yellow	1	Congruent	5089	JL	121_square_yellow_blue.jpg 122_square_yellow_yellow.jpg	6	N	3.70663
Gorilla	Ape	Yellow	43671	0.380625	FisherCenter-PC	Adv Pref FC	Umande	Phase 3_2-2.txt	10	290	2	None	4000	White	Scattered	101_bicycle_blue.JPG	102_bicycle_yellow.JPG	24	17	101_bicycle_blue.JPG	Blue	0	Control	1950	JL	101_bicycle_blue.JPG 102_bicycle_yellow.JPG	6	N	3.29003
Gorilla	Ape	Yellow	43671	0.380694	FisherCenter-PC	Adv Pref FC	Umande	Phase 3_2-2.txt	11	290	2	None	4000	White	Scattered	105_cross_yellow_blue.jpg	106_cross_yellow_yellow.jpg	21	23	105_cross_yellow_blue.jpg	Blue	0	Congruent	2440	JL	105_cross_yellow_blue.jpg 106_cross_yellow_yellow.jpg	6	N	3.38739
Gorilla	Ape	Yellow	43671	0.380775	FisherCenter-PC	Adv Pref FC	Umande	Phase 3_2-2.txt	12	290	2	None	4000	White	Scattered	107_fidget_spinner_blue.jpg	108_fidget_spinner_yellow.jpg	25	21	108_fidget_spinner_yellow.jpg	Yellow	1	Control	1344	JL	107_fidget_spinner_blue.jpg 108_fidget_spinner_yellow.jpg	6	N	3.1284
Gorilla	Ape	Yellow	43671	0.380833	FisherCenter-PC	Adv Pref FC	Umande	Phase 3_2-2.txt	13	290	2	None	4000	White	Scattered	125_star_yellow_blue.jpg	126_star_yellow_yellow.jpg	21	15	125_star_yellow_blue.jpg	Blue	0	Congruent	1383	JL	125_star_yellow_blue.jpg 126_star_yellow_yellow.jpg	6	N	3.14082
Gorilla	Ape	Yellow	43671	0.380903	FisherCenter-PC	Adv Pref FC	Umande	Phase 3_2-2.txt	14	290	2	None	4000	White	Scattered	103_cross_blue_blue.JPG	104_cross_blue_yellow.JPG	16	17	104_cross_blue_yellow.JPG	Yellow	1	Incongruent	1604	JL	103_cross_blue_blue.JPG 104_cross_blue_yellow.JPG	6	N	3.2052
Gorilla	Ape	Yellow	43671	0.380961	FisherCenter-PC	Adv Pref FC	Umande	Phase 3_2-2.txt	15	290	2	None	4000	White	Scattered	109_fork_blue.jpg	110_fork_yellow.jpg	21	14	109_fork_blue.jpg	Blue	0	Control	3291	JL	109_fork_blue.jpg 110_fork_yellow.jpg	6	N	3.51733
Gorilla	Ape	Yellow	43671	0.381053	FisherCenter-PC	Adv Pref FC	Umande	Phase 3_2-2.txt	16	290	2	None	4000	White	Scattered	121_square_yellow_blue.jpg	122_square_yellow_yellow.jpg	24	11	121_square_yellow_blue.jpg	Blue	0	Congruent	1943	JL	121_square_yellow_blue.jpg 122_square_yellow_yellow.jpg	6	N	3.28847
Gorilla	Ape	Yellow	43671	0.381123	FisherCenter-PC	Adv Pref FC	Umande	Phase 3_2-2.txt	17	290	2	None	4000	White	Scattered	119_square_blue_blue.jpg	120_square_blue_yellow.jpg	16	24	119_square_blue_blue.jpg	Blue	0	Incongruent	1485	JL	119_square_blue_blue.jpg 120_square_blue_yellow.jpg	6	N	3.17173
Gorilla	Ape	Yellow	43671	0.381181	FisherCenter-PC	Adv Pref FC	Umande	Phase 3_2-2.txt	18	290	2	None	4000	White	Scattered	113_heart_yellow_blue.jpg	114_heart_yellow_yellow.jpg	24	20	113_heart_yellow_blue.jpg	Blue	0	Congruent	1371	JL	113_heart_yellow_blue.jpg 114_heart_yellow_yellow.jpg	6	N	3.13704
Gorilla	Ape	Yellow	43671	0.38125	FisherCenter-PC	Adv Pref FC	Umande	Phase 3_2-2.txt	19	290	2	None	4000	White	Scattered	117_shovel_blue.jpg	118_shovel_yellow.jpg	13	12	118_shovel_yellow.jpg	Yellow	1	Control	1240	JL	117_shovel_blue.jpg 118_shovel_yellow.jpg	6	N	3.09342
Gorilla	Ape	Yellow	43671	0.381308	FisherCenter-PC	Adv Pref FC	Umande	Phase 3_2-2.txt	20	290	2	None	4000	White	Scattered	103_cross_blue_blue.JPG	104_cross_blue_yellow.JPG	12	25	104_cross_blue_yellow.JPG	Yellow	1	Incongruent	1532	JL	103_cross_blue_blue.JPG 104_cross_blue_yellow.JPG	6	N	3.18526
Gorilla	Ape	Yellow	43671	0.381377	FisherCenter-PC	Adv Pref FC	Umande	Phase 3_2-2.txt	21	290	2	None	4000	White	Scattered	107_fidget_spinner_blue.jpg	108_fidget_spinner_yellow.jpg	17	11	107_fidget_spinner_blue.jpg	Blue	0	Control	1298	JL	107_fidget_spinner_blue.jpg 108_fidget_spinner_yellow.jpg	6	N	3.11327
Gorilla	Ape	Yellow	43671	0.381435	FisherCenter-PC	Adv Pref FC	Umande	Phase 3_2-2.txt	22	290	2	None	4000	White	Scattered	123_star_blue_blue.jpg	124_star_blue_yellow.jpg	14	24	124_star_blue_yellow.jpg	Yellow	1	Incongruent	2283	JL	123_star_blue_blue.jpg 124_star_blue_yellow.jpg	6	N	3.35851
Gorilla	Ape	Yellow	43671	0.381516	FisherCenter-PC	Adv Pref FC	Umande	Phase 3_2-2.txt	23	290	2	None	4000	White	Scattered	113_heart_yellow_blue.jpg	114_heart_yellow_yellow.jpg	13	24	114_heart_yellow_yellow.jpg	Yellow	1	Congruent	1335	JL	113_heart_yellow_blue.jpg 114_heart_yellow_yellow.jpg	6	N	3.12548
Gorilla	Ape	Yellow	43671	0.381574	FisherCenter-PC	Adv Pref FC	Umande	Phase 3_2-2.txt	24	290	2	None	4000	White	Scattered	119_square_blue_blue.jpg	120_square_blue_yellow.jpg	21	25	119_square_blue_blue.jpg	Blue	0	Incongruent	1204	JL	119_square_blue_blue.jpg 120_square_blue_yellow.jpg	6	N	3.08063
Gorilla	Ape	Yellow	43671	0.381632	FisherCenter-PC	Adv Pref FC	Umande	Phase 3_2-2.txt	25	290	2	None	4000	White	Scattered	117_shovel_blue.jpg	118_shovel_yellow.jpg	15	25	118_shovel_yellow.jpg	Yellow	1	Control	3608	JL	117_shovel_blue.jpg 118_shovel_yellow.jpg	6	N	3.55727
Gorilla	Ape	Yellow	43671	0.381725	FisherCenter-PC	Adv Pref FC	Umande	Phase 3_2-2.txt	26	290	2	None	4000	White	Scattered	105_cross_yellow_blue.jpg	106_cross_yellow_yellow.jpg	18	11	105_cross_yellow_blue.jpg	Blue	0	Congruent	1274	JL	105_cross_yellow_blue.jpg 106_cross_yellow_yellow.jpg	6	N	3.10517
Gorilla	Ape	Yellow	43671	0.381794	FisherCenter-PC	Adv Pref FC	Umande	Phase 3_2-2.txt	27	290	2	None	4000	White	Scattered	123_star_blue_blue.jpg	124_star_blue_yellow.jpg	23	20	124_star_blue_yellow.jpg	Yellow	1	Incongruent	1524	JL	123_star_blue_blue.jpg 124_star_blue_yellow.jpg	6	N	3.18298
Gorilla	Ape	Yellow	43671	0.381852	FisherCenter-PC	Adv Pref FC	Umande	Phase 3_2-2.txt	28	290	2	None	4000	White	Scattered	111_heart_blue_blue.jpg	112_heart_blue_yellow.jpg	19	11	111_heart_blue_blue.jpg	Blue	0	Incongruent	1454	JL	111_heart_blue_blue.jpg 112_heart_blue_yellow.jpg	6	N	3.16256
Gorilla	Ape	Yellow	43671	0.381921	FisherCenter-PC	Adv Pref FC	Umande	Phase 3_2-2.txt	29	290	2	None	4000	White	Scattered	101_bicycle_blue.JPG	102_bicycle_yellow.JPG	13	11	102_bicycle_yellow.JPG	Yellow	1	Control	1290	JL	101_bicycle_blue.JPG 102_bicycle_yellow.JPG	6	N	3.11059
Gorilla	Ape	Yellow	43671	0.381979	FisherCenter-PC	Adv Pref FC	Umande	Phase 3_2-2.txt	30	290	2	None	4000	White	Scattered	103_cross_blue_blue.JPG	104_cross_blue_yellow.JPG	14	11	103_cross_blue_blue.JPG	Blue	0	Incongruent	1466	JL	103_cross_blue_blue.JPG 104_cross_blue_yellow.JPG	6	N	3.16613
Gorilla	Ape	Yellow	43672	0.38294	FisherCenter-PC	Adv Pref FC	Umande	Phase 3_2-3.txt	1	290	2	None	4000	White	Scattered	119_square_blue_blue.jpg	120_square_blue_yellow.jpg	16	19	120_square_blue_yellow.jpg	Yellow	1	Incongruent	1093	JL	119_square_blue_blue.jpg 120_square_blue_yellow.jpg	7	N	3.03862
Gorilla	Ape	Yellow	43672	0.382998	FisherCenter-PC	Adv Pref FC	Umande	Phase 3_2-3.txt	2	290	2	None	4000	White	Scattered	125_star_yellow_blue.jpg	126_star_yellow_yellow.jpg	11	19	126_star_yellow_yellow.jpg	Yellow	1	Congruent	1393	JL	125_star_yellow_blue.jpg 126_star_yellow_yellow.jpg	7	N	3.14395
Gorilla	Ape	Yellow	43672	0.383056	FisherCenter-PC	Adv Pref FC	Umande	Phase 3_2-3.txt	3	290	2	None	4000	White	Scattered	111_heart_blue_blue.jpg	112_heart_blue_yellow.jpg	23	18	111_heart_blue_blue.jpg	Blue	0	Incongruent	1774	JL	111_heart_blue_blue.jpg 112_heart_blue_yellow.jpg	7	N	3.24895
Gorilla	Ape	Yellow	43672	0.383125	FisherCenter-PC	Adv Pref FC	Umande	Phase 3_2-3.txt	4	290	2	None	4000	White	Scattered	105_cross_yellow_blue.jpg	106_cross_yellow_yellow.jpg	24	16	105_cross_yellow_blue.jpg	Blue	0	Congruent	3527	JL	105_cross_yellow_blue.jpg 106_cross_yellow_yellow.jpg	7	N	3.54741
Gorilla	Ape	Yellow	43672	0.383218	FisherCenter-PC	Adv Pref FC	Umande	Phase 3_2-3.txt	5	290	2	None	4000	White	Scattered	115_mug_blue.jpg	116_mug_yellow.jpg	22	25	115_mug_blue.jpg	Blue	0	Control	1029	JL	115_mug_blue.jpg 116_mug_yellow.jpg	7	N	3.01242
Gorilla	Ape	Yellow	43672	0.383275	FisherCenter-PC	Adv Pref FC	Umande	Phase 3_2-3.txt	6	290	2	None	4000	White	Scattered	113_heart_yellow_blue.jpg	114_heart_yellow_yellow.jpg	25	23	113_heart_yellow_blue.jpg	Blue	0	Congruent	1672	JL	113_heart_yellow_blue.jpg 114_heart_yellow_yellow.jpg	7	N	3.22324
Gorilla	Ape	Yellow	43672	0.383345	FisherCenter-PC	Adv Pref FC	Umande	Phase 3_2-3.txt	7	290	2	None	4000	White	Scattered	103_cross_blue_blue.JPG	104_cross_blue_yellow.JPG	24	16	103_cross_blue_blue.JPG	Blue	0	Incongruent	1258	JL	103_cross_blue_blue.JPG 104_cross_blue_yellow.JPG	7	N	3.09968
Gorilla	Ape	Yellow	43672	0.383403	FisherCenter-PC	Adv Pref FC	Umande	Phase 3_2-3.txt	8	290	2	None	4000	White	Scattered	101_bicycle_blue.JPG	102_bicycle_yellow.JPG	16	11	102_bicycle_yellow.JPG	Yellow	1	Control	1851	JL	101_bicycle_blue.JPG 102_bicycle_yellow.JPG	7	N	3.26741
Gorilla	Ape	Yellow	43672	0.383472	FisherCenter-PC	Adv Pref FC	Umande	Phase 3_2-3.txt	9	290	2	None	4000	White	Scattered	103_cross_blue_blue.JPG	104_cross_blue_yellow.JPG	24	16	103_cross_blue_blue.JPG	Blue	0	Incongruent	2629	JL	103_cross_blue_blue.JPG 104_cross_blue_yellow.JPG	7	N	3.41979
Gorilla	Ape	Yellow	43672	0.383553	FisherCenter-PC	Adv Pref FC	Umande	Phase 3_2-3.txt	10	290	2	None	4000	White	Scattered	109_fork_blue.jpg	110_fork_yellow.jpg	12	20	110_fork_yellow.jpg	Yellow	1	Control	1493	JL	109_fork_blue.jpg 110_fork_yellow.jpg	7	N	3.17406
Gorilla	Ape	Yellow	43672	0.383623	FisherCenter-PC	Adv Pref FC	Umande	Phase 3_2-3.txt	11	290	2	None	4000	White	Scattered	123_star_blue_blue.jpg	124_star_blue_yellow.jpg	20	12	123_star_blue_blue.jpg	Blue	0	Incongruent	1099	JL	123_star_blue_blue.jpg 124_star_blue_yellow.jpg	7	N	3.041
Gorilla	Ape	Yellow	43672	0.383681	FisherCenter-PC	Adv Pref FC	Umande	Phase 3_2-3.txt	12	290	2	None	4000	White	Scattered	105_cross_yellow_blue.jpg	106_cross_yellow_yellow.jpg	25	12	106_cross_yellow_yellow.jpg	Yellow	1	Congruent	1630	JL	105_cross_yellow_blue.jpg 106_cross_yellow_yellow.jpg	7	N	3.21219
Gorilla	Ape	Yellow	43672	0.383738	FisherCenter-PC	Adv Pref FC	Umande	Phase 3_2-3.txt	13	290	2	None	4000	White	Scattered	101_bicycle_blue.JPG	102_bicycle_yellow.JPG	18	12	101_bicycle_blue.JPG	Blue	0	Control	1449	JL	101_bicycle_blue.JPG 102_bicycle_yellow.JPG	7	N	3.16107
Gorilla	Ape	Yellow	43672	0.383808	FisherCenter-PC	Adv Pref FC	Umande	Phase 3_2-3.txt	14	290	2	None	4000	White	Scattered	121_square_yellow_blue.jpg	122_square_yellow_yellow.jpg	20	25	122_square_yellow_yellow.jpg	Yellow	1	Congruent	1542	JL	121_square_yellow_blue.jpg 122_square_yellow_yellow.jpg	7	N	3.18808
Gorilla	Ape	Yellow	43672	0.383877	FisherCenter-PC	Adv Pref FC	Umande	Phase 3_2-3.txt	15	290	2	None	4000	White	Scattered	119_square_blue_blue.jpg	120_square_blue_yellow.jpg	20	25	120_square_blue_yellow.jpg	Yellow	1	Incongruent	2113	JL	119_square_blue_blue.jpg 120_square_blue_yellow.jpg	7	N	3.3249
Gorilla	Ape	Yellow	43672	0.383947	FisherCenter-PC	Adv Pref FC	Umande	Phase 3_2-3.txt	16	290	2	None	4000	White	Scattered	121_square_yellow_blue.jpg	122_square_yellow_yellow.jpg	18	23	122_square_yellow_yellow.jpg	Yellow	1	Congruent	8309	JL	121_square_yellow_blue.jpg 122_square_yellow_yellow.jpg	7	N	3.91955
Gorilla	Ape	Yellow	43672	0.384086	FisherCenter-PC	Adv Pref FC	Umande	Phase 3_2-3.txt	17	290	2	None	4000	White	Scattered	109_fork_blue.jpg	110_fork_yellow.jpg	16	24	110_fork_yellow.jpg	Yellow	1	Control	4620	JL	109_fork_blue.jpg 110_fork_yellow.jpg	7	N	3.66464
Gorilla	Ape	Yellow	43672	0.38419	FisherCenter-PC	Adv Pref FC	Umande	Phase 3_2-3.txt	18	290	2	None	4000	White	Scattered	111_heart_blue_blue.jpg	112_heart_blue_yellow.jpg	18	11	111_heart_blue_blue.jpg	Blue	0	Incongruent	2627	JL	111_heart_blue_blue.jpg 112_heart_blue_yellow.jpg	7	N	3.41946
Gorilla	Ape	Yellow	43672	0.384271	FisherCenter-PC	Adv Pref FC	Umande	Phase 3_2-3.txt	19	290	2	None	4000	White	Scattered	107_fidget_spinner_blue.jpg	108_fidget_spinner_yellow.jpg	22	20	108_fidget_spinner_yellow.jpg	Yellow	1	Control	1529	JL	107_fidget_spinner_blue.jpg 108_fidget_spinner_yellow.jpg	7	N	3.18441
Gorilla	Ape	Yellow	43672	0.384329	FisherCenter-PC	Adv Pref FC	Umande	Phase 3_2-3.txt	20	290	2	None	4000	White	Scattered	119_square_blue_blue.jpg	120_square_blue_yellow.jpg	19	11	119_square_blue_blue.jpg	Blue	0	Incongruent	3421	JL	119_square_blue_blue.jpg 120_square_blue_yellow.jpg	7	N	3.53415
Gorilla	Ape	Yellow	43672	0.384421	FisherCenter-PC	Adv Pref FC	Umande	Phase 3_2-3.txt	21	290	2	None	4000	White	Scattered	121_square_yellow_blue.jpg	122_square_yellow_yellow.jpg	22	13	122_square_yellow_yellow.jpg	Yellow	1	Congruent	5449	JL	121_square_yellow_blue.jpg 122_square_yellow_yellow.jpg	7	N	3.73632
Gorilla	Ape	Yellow	43672	0.384537	FisherCenter-PC	Adv Pref FC	Umande	Phase 3_2-3.txt	22	290	2	None	4000	White	Scattered	117_shovel_blue.jpg	118_shovel_yellow.jpg	21	24	118_shovel_yellow.jpg	Yellow	1	Control	1787	JL	117_shovel_blue.jpg 118_shovel_yellow.jpg	7	N	3.25212
Gorilla	Ape	Yellow	43672	0.384595	FisherCenter-PC	Adv Pref FC	Umande	Phase 3_2-3.txt	23	290	2	None	4000	White	Scattered	113_heart_yellow_blue.jpg	114_heart_yellow_yellow.jpg	15	13	113_heart_yellow_blue.jpg	Blue	0	Congruent	1022	JL	113_heart_yellow_blue.jpg 114_heart_yellow_yellow.jpg	7	N	3.00945
Gorilla	Ape	Yellow	43672	0.384664	FisherCenter-PC	Adv Pref FC	Umande	Phase 3_2-3.txt	24	290	2	None	4000	White	Scattered	115_mug_blue.jpg	116_mug_yellow.jpg	25	21	115_mug_blue.jpg	Blue	0	Control	1509	JL	115_mug_blue.jpg 116_mug_yellow.jpg	7	N	3.17869
Gorilla	Ape	Yellow	43672	0.384722	FisherCenter-PC	Adv Pref FC	Umande	Phase 3_2-3.txt	25	290	2	None	4000	White	Scattered	111_heart_blue_blue.jpg	112_heart_blue_yellow.jpg	25	20	112_heart_blue_yellow.jpg	Yellow	1	Incongruent	1771	JL	111_heart_blue_blue.jpg 112_heart_blue_yellow.jpg	7	N	3.24822
Gorilla	Ape	Yellow	43672	0.384792	FisherCenter-PC	Adv Pref FC	Umande	Phase 3_2-3.txt	26	290	2	None	4000	White	Scattered	125_star_yellow_blue.jpg	126_star_yellow_yellow.jpg	23	13	126_star_yellow_yellow.jpg	Yellow	1	Congruent	1119	JL	125_star_yellow_blue.jpg 126_star_yellow_yellow.jpg	7	N	3.04883
Gorilla	Ape	Yellow	43672	0.38485	FisherCenter-PC	Adv Pref FC	Umande	Phase 3_2-3.txt	27	290	2	None	4000	White	Scattered	117_shovel_blue.jpg	118_shovel_yellow.jpg	19	13	118_shovel_yellow.jpg	Yellow	1	Control	1261	JL	117_shovel_blue.jpg 118_shovel_yellow.jpg	7	N	3.10072
Gorilla	Ape	Yellow	43672	0.384919	FisherCenter-PC	Adv Pref FC	Umande	Phase 3_2-3.txt	28	290	2	None	4000	White	Scattered	113_heart_yellow_blue.jpg	114_heart_yellow_yellow.jpg	23	17	113_heart_yellow_blue.jpg	Blue	0	Congruent	1488	JL	113_heart_yellow_blue.jpg 114_heart_yellow_yellow.jpg	7	N	3.1726
Gorilla	Ape	Yellow	43672	0.384977	FisherCenter-PC	Adv Pref FC	Umande	Phase 3_2-3.txt	29	290	2	None	4000	White	Scattered	107_fidget_spinner_blue.jpg	108_fidget_spinner_yellow.jpg	24	19	107_fidget_spinner_blue.jpg	Blue	0	Control	1506	JL	107_fidget_spinner_blue.jpg 108_fidget_spinner_yellow.jpg	7	N	3.17782
Gorilla	Ape	Yellow	43672	0.385046	FisherCenter-PC	Adv Pref FC	Umande	Phase 3_2-3.txt	30	290	2	None	4000	White	Scattered	123_star_blue_blue.jpg	124_star_blue_yellow.jpg	20	19	123_star_blue_blue.jpg	Blue	0	Incongruent	1496	JL	123_star_blue_blue.jpg 124_star_blue_yellow.jpg	7	N	3.17493
Gorilla	Ape	Yellow	43675	0.388461	FisherCenter-PC	Adv Pref FC	Umande	Phase 3_2-4.txt	1	290	2	None	4000	White	Scattered	123_star_blue_blue.jpg	124_star_blue_yellow.jpg	11	12	124_star_blue_yellow.jpg	Yellow	1	Incongruent	4773	JL	123_star_blue_blue.jpg 124_star_blue_yellow.jpg	8	N	3.67879
Gorilla	Ape	Yellow	43675	0.388565	FisherCenter-PC	Adv Pref FC	Umande	Phase 3_2-4.txt	2	290	2	None	4000	White	Scattered	115_mug_blue.jpg	116_mug_yellow.jpg	19	24	116_mug_yellow.jpg	Yellow	1	Control	1921	JL	115_mug_blue.jpg 116_mug_yellow.jpg	8	N	3.28353
Gorilla	Ape	Yellow	43675	0.388634	FisherCenter-PC	Adv Pref FC	Umande	Phase 3_2-4.txt	3	290	2	None	4000	White	Scattered	105_cross_yellow_blue.jpg	106_cross_yellow_yellow.jpg	21	17	106_cross_yellow_yellow.jpg	Yellow	1	Congruent	3407	JL	105_cross_yellow_blue.jpg 106_cross_yellow_yellow.jpg	8	N	3.53237
Gorilla	Ape	Yellow	43675	0.388727	FisherCenter-PC	Adv Pref FC	Umande	Phase 3_2-4.txt	4	290	2	None	4000	White	Scattered	109_fork_blue.jpg	110_fork_yellow.jpg	14	11	109_fork_blue.jpg	Blue	0	Control	1490	JL	109_fork_blue.jpg 110_fork_yellow.jpg	8	N	3.17319
Gorilla	Ape	Yellow	43675	0.388796	FisherCenter-PC	Adv Pref FC	Umande	Phase 3_2-4.txt	5	290	2	None	4000	White	Scattered	123_star_blue_blue.jpg	124_star_blue_yellow.jpg	20	16	123_star_blue_blue.jpg	Blue	0	Incongruent	1266	JL	123_star_blue_blue.jpg 124_star_blue_yellow.jpg	8	N	3.10243
Gorilla	Ape	Yellow	43675	0.388854	FisherCenter-PC	Adv Pref FC	Umande	Phase 3_2-4.txt	6	290	2	None	4000	White	Scattered	113_heart_yellow_blue.jpg	114_heart_yellow_yellow.jpg	13	16	114_heart_yellow_yellow.jpg	Yellow	1	Congruent	1562	JL	113_heart_yellow_blue.jpg 114_heart_yellow_yellow.jpg	8	N	3.19368
Gorilla	Ape	Yellow	43675	0.388924	FisherCenter-PC	Adv Pref FC	Umande	Phase 3_2-4.txt	7	290	2	None	4000	White	Scattered	117_shovel_blue.jpg	118_shovel_yellow.jpg	17	11	118_shovel_yellow.jpg	Yellow	1	Control	3355	JL	117_shovel_blue.jpg 118_shovel_yellow.jpg	8	N	3.52569
Gorilla	Ape	Yellow	43675	0.389005	FisherCenter-PC	Adv Pref FC	Umande	Phase 3_2-4.txt	8	290	2	None	4000	White	Scattered	125_star_yellow_blue.jpg	126_star_yellow_yellow.jpg	18	25	126_star_yellow_yellow.jpg	Yellow	1	Congruent	3989	JL	125_star_yellow_blue.jpg 126_star_yellow_yellow.jpg	8	N	3.60086
Gorilla	Ape	Yellow	43675	0.389097	FisherCenter-PC	Adv Pref FC	Umande	Phase 3_2-4.txt	9	290	2	None	4000	White	Scattered	109_fork_blue.jpg	110_fork_yellow.jpg	21	18	110_fork_yellow.jpg	Yellow	1	Control	955	JL	109_fork_blue.jpg 110_fork_yellow.jpg	8	N	2.98
Gorilla	Ape	Yellow	43675	0.389155	FisherCenter-PC	Adv Pref FC	Umande	Phase 3_2-4.txt	10	290	2	None	4000	White	Scattered	113_heart_yellow_blue.jpg	114_heart_yellow_yellow.jpg	20	17	113_heart_yellow_blue.jpg	Blue	0	Congruent	3023	JL	113_heart_yellow_blue.jpg 114_heart_yellow_yellow.jpg	8	N	3.48044
Gorilla	Ape	Yellow	43675	0.389236	FisherCenter-PC	Adv Pref FC	Umande	Phase 3_2-4.txt	11	290	2	None	4000	White	Scattered	111_heart_blue_blue.jpg	112_heart_blue_yellow.jpg	22	15	112_heart_blue_yellow.jpg	Yellow	1	Incongruent	1566	JL	111_heart_blue_blue.jpg 112_heart_blue_yellow.jpg	8	N	3.19479
Gorilla	Ape	Yellow	43675	0.389306	FisherCenter-PC	Adv Pref FC	Umande	Phase 3_2-4.txt	12	290	2	None	4000	White	Scattered	119_square_blue_blue.jpg	120_square_blue_yellow.jpg	25	22	119_square_blue_blue.jpg	Blue	0	Incongruent	2273	JL	119_square_blue_blue.jpg 120_square_blue_yellow.jpg	8	N	3.3566
Gorilla	Ape	Yellow	43675	0.389387	FisherCenter-PC	Adv Pref FC	Umande	Phase 3_2-4.txt	13	290	2	None	4000	White	Scattered	105_cross_yellow_blue.jpg	106_cross_yellow_yellow.jpg	18	23	105_cross_yellow_blue.jpg	Blue	0	Congruent	1334	JL	105_cross_yellow_blue.jpg 106_cross_yellow_yellow.jpg	8	N	3.12516
Gorilla	Ape	Yellow	43675	0.389444	FisherCenter-PC	Adv Pref FC	Umande	Phase 3_2-4.txt	14	290	2	None	4000	White	Scattered	101_bicycle_blue.JPG	102_bicycle_yellow.JPG	15	14	101_bicycle_blue.JPG	Blue	0	Control	1633	JL	101_bicycle_blue.JPG 102_bicycle_yellow.JPG	8	N	3.21299
Gorilla	Ape	Yellow	43675	0.389514	FisherCenter-PC	Adv Pref FC	Umande	Phase 3_2-4.txt	15	290	2	None	4000	White	Scattered	119_square_blue_blue.jpg	120_square_blue_yellow.jpg	22	19	120_square_blue_yellow.jpg	Yellow	1	Incongruent	1260	JL	119_square_blue_blue.jpg 120_square_blue_yellow.jpg	8	N	3.10037
Gorilla	Ape	Yellow	43675	0.389572	FisherCenter-PC	Adv Pref FC	Umande	Phase 3_2-4.txt	16	290	2	None	4000	White	Scattered	105_cross_yellow_blue.jpg	106_cross_yellow_yellow.jpg	17	16	105_cross_yellow_blue.jpg	Blue	0	Congruent	7149	JL	105_cross_yellow_blue.jpg 106_cross_yellow_yellow.jpg	8	N	3.85425
Gorilla	Ape	Yellow	43675	0.389699	FisherCenter-PC	Adv Pref FC	Umande	Phase 3_2-4.txt	17	290	2	None	4000	White	Scattered	103_cross_blue_blue.JPG	104_cross_blue_yellow.JPG	18	11	104_cross_blue_yellow.JPG	Yellow	1	Incongruent	1331	JL	103_cross_blue_blue.JPG 104_cross_blue_yellow.JPG	8	N	3.12418
Gorilla	Ape	Yellow	43675	0.389769	FisherCenter-PC	Adv Pref FC	Umande	Phase 3_2-4.txt	18	290	2	None	4000	White	Scattered	115_mug_blue.jpg	116_mug_yellow.jpg	13	22	116_mug_yellow.jpg	Yellow	1	Control	3435	JL	115_mug_blue.jpg 116_mug_yellow.jpg	8	N	3.53593
Gorilla	Ape	Yellow	43675	0.38985	FisherCenter-PC	Adv Pref FC	Umande	Phase 3_2-4.txt	19	290	2	None	4000	White	Scattered	125_star_yellow_blue.jpg	126_star_yellow_yellow.jpg	25	24	125_star_yellow_blue.jpg	Blue	0	Congruent	4802	JL	125_star_yellow_blue.jpg 126_star_yellow_yellow.jpg	8	N	3.68142
Gorilla	Ape	Yellow	43675	0.389954	FisherCenter-PC	Adv Pref FC	Umande	Phase 3_2-4.txt	20	290	2	None	4000	White	Scattered	107_fidget_spinner_blue.jpg	108_fidget_spinner_yellow.jpg	14	16	107_fidget_spinner_blue.jpg	Blue	0	Control	1305	JL	107_fidget_spinner_blue.jpg 108_fidget_spinner_yellow.jpg	8	N	3.11561
Gorilla	Ape	Yellow	43675	0.390023	FisherCenter-PC	Adv Pref FC	Umande	Phase 3_2-4.txt	21	290	2	None	4000	White	Scattered	123_star_blue_blue.jpg	124_star_blue_yellow.jpg	16	18	124_star_blue_yellow.jpg	Yellow	1	Incongruent	1184	JL	123_star_blue_blue.jpg 124_star_blue_yellow.jpg	8	N	3.07335
Gorilla	Ape	Yellow	43675	0.390081	FisherCenter-PC	Adv Pref FC	Umande	Phase 3_2-4.txt	22	290	2	None	4000	White	Scattered	101_bicycle_blue.JPG	102_bicycle_yellow.JPG	15	19	102_bicycle_yellow.JPG	Yellow	1	Control	2953	JL	101_bicycle_blue.JPG 102_bicycle_yellow.JPG	8	N	3.47026
Gorilla	Ape	Yellow	43675	0.390162	FisherCenter-PC	Adv Pref FC	Umande	Phase 3_2-4.txt	23	290	2	None	4000	White	Scattered	121_square_yellow_blue.jpg	122_square_yellow_yellow.jpg	22	25	122_square_yellow_yellow.jpg	Yellow	1	Congruent	4546	JL	121_square_yellow_blue.jpg 122_square_yellow_yellow.jpg	8	N	3.65763
Gorilla	Ape	Yellow	43675	0.390266	FisherCenter-PC	Adv Pref FC	Umande	Phase 3_2-4.txt	24	290	2	None	4000	White	Scattered	111_heart_blue_blue.jpg	112_heart_blue_yellow.jpg	25	18	111_heart_blue_blue.jpg	Blue	0	Incongruent	2006	JL	111_heart_blue_blue.jpg 112_heart_blue_yellow.jpg	8	N	3.30233
Gorilla	Ape	Yellow	43675	0.390336	FisherCenter-PC	Adv Pref FC	Umande	Phase 3_2-4.txt	25	290	2	None	4000	White	Scattered	107_fidget_spinner_blue.jpg	108_fidget_spinner_yellow.jpg	15	21	108_fidget_spinner_yellow.jpg	Yellow	1	Control	2827	JL	107_fidget_spinner_blue.jpg 108_fidget_spinner_yellow.jpg	8	N	3.45133
Gorilla	Ape	Yellow	43675	0.390417	FisherCenter-PC	Adv Pref FC	Umande	Phase 3_2-4.txt	26	290	2	None	4000	White	Scattered	103_cross_blue_blue.JPG	104_cross_blue_yellow.JPG	25	22	103_cross_blue_blue.JPG	Blue	0	Incongruent	1314	JL	103_cross_blue_blue.JPG 104_cross_blue_yellow.JPG	8	N	3.1186
Gorilla	Ape	Yellow	43675	0.390475	FisherCenter-PC	Adv Pref FC	Umande	Phase 3_2-4.txt	27	290	2	None	4000	White	Scattered	125_star_yellow_blue.jpg	126_star_yellow_yellow.jpg	15	23	126_star_yellow_yellow.jpg	Yellow	1	Congruent	1836	JL	125_star_yellow_blue.jpg 126_star_yellow_yellow.jpg	8	N	3.26387
Gorilla	Ape	Yellow	43675	0.390544	FisherCenter-PC	Adv Pref FC	Umande	Phase 3_2-4.txt	28	290	2	None	4000	White	Scattered	117_shovel_blue.jpg	118_shovel_yellow.jpg	23	22	117_shovel_blue.jpg	Blue	0	Control	1148	JL	117_shovel_blue.jpg 118_shovel_yellow.jpg	8	N	3.05994
Gorilla	Ape	Yellow	43675	0.390602	FisherCenter-PC	Adv Pref FC	Umande	Phase 3_2-4.txt	29	290	2	None	4000	White	Scattered	121_square_yellow_blue.jpg	122_square_yellow_yellow.jpg	12	18	122_square_yellow_yellow.jpg	Yellow	1	Congruent	1250	JL	121_square_yellow_blue.jpg 122_square_yellow_yellow.jpg	8	N	3.09691
Gorilla	Ape	Yellow	43675	0.390671	FisherCenter-PC	Adv Pref FC	Umande	Phase 3_2-4.txt	30	290	2	None	4000	White	Scattered	103_cross_blue_blue.JPG	104_cross_blue_yellow.JPG	19	14	104_cross_blue_yellow.JPG	Yellow	1	Incongruent	6496	JL	103_cross_blue_blue.JPG 104_cross_blue_yellow.JPG	8	N	3.81265
Macaque	Monkey	Yellow	43411	44167	RMF-BoothDT1	Adv Pref FC	Izumi	Stroop_3_2_1.csv	1	290	2	60	3000	White	Scattered	113_heart_yellow_blue.jpg	114_heart_yellow_yellow.jpg	16	21	114_heart_yellow_yellow.jpg	Yellow	1	Congruent	977	NA	113_heart_yellow_blue.jpg 114_heart_yellow_yellow.jpg	1	N	2.98989
Macaque	Monkey	Yellow	43411	44167	RMF-BoothDT1	Adv Pref FC	Izumi	Stroop_3_2_1.csv	2	290	2	60	3000	White	Scattered	103_cross_blue_blue.JPG	104_cross_blue_yellow.JPG	13	15	104_cross_blue_yellow.JPG	Yellow	1	Incongruent	4736	NA	103_cross_blue_blue.JPG 104_cross_blue_yellow.JPG	1	N	3.67541
Macaque	Monkey	Yellow	43411	44167	RMF-BoothDT1	Adv Pref FC	Izumi	Stroop_3_2_1.csv	3	290	2	60	3000	White	Scattered	121_square_yellow_blue.jpg	122_square_yellow_yellow.jpg	23	13	121_square_yellow_blue.jpg	Blue	0	Congruent	4687	NA	121_square_yellow_blue.jpg 122_square_yellow_yellow.jpg	1	N	3.67089
Macaque	Monkey	Yellow	43411	44167	RMF-BoothDT1	Adv Pref FC	Izumi	Stroop_3_2_1.csv	4	290	2	60	3000	White	Scattered	117_shovel_blue.jpg	118_shovel_yellow.jpg	13	19	118_shovel_yellow.jpg	Yellow	1	Control	1791	NA	117_shovel_blue.jpg 118_shovel_yellow.jpg	1	N	3.2531
Macaque	Monkey	Yellow	43411	44167	RMF-BoothDT1	Adv Pref FC	Izumi	Stroop_3_2_1.csv	5	290	2	60	3000	White	Scattered	123_star_blue_blue.jpg	124_star_blue_yellow.jpg	25	18	124_star_blue_yellow.jpg	Yellow	1	Incongruent	3080	NA	123_star_blue_blue.jpg 124_star_blue_yellow.jpg	1	N	3.48855
Macaque	Monkey	Yellow	43411	44167	RMF-BoothDT1	Adv Pref FC	Izumi	Stroop_3_2_1.csv	6	290	2	60	3000	White	Scattered	109_fork_blue.jpg	110_fork_yellow.jpg	17	20	110_fork_yellow.jpg	Yellow	1	Control	4590	NA	109_fork_blue.jpg 110_fork_yellow.jpg	1	N	3.66181
Macaque	Monkey	Yellow	43411	44167	RMF-BoothDT1	Adv Pref FC	Izumi	Stroop_3_2_1.csv	7	290	2	60	3000	White	Scattered	121_square_yellow_blue.jpg	122_square_yellow_yellow.jpg	12	14	122_square_yellow_yellow.jpg	Yellow	1	Congruent	6260	NA	121_square_yellow_blue.jpg 122_square_yellow_yellow.jpg	1	Y	3.79657
Macaque	Monkey	Yellow	43411	44167	RMF-BoothDT1	Adv Pref FC	Izumi	Stroop_3_2_1.csv	8	290	2	60	3000	White	Scattered	111_heart_blue_blue.jpg	112_heart_blue_yellow.jpg	22	20	112_heart_blue_yellow.jpg	Yellow	1	Incongruent	1421	NA	111_heart_blue_blue.jpg 112_heart_blue_yellow.jpg	1	N	3.15259
Macaque	Monkey	Yellow	43411	44167	RMF-BoothDT1	Adv Pref FC	Izumi	Stroop_3_2_1.csv	9	290	2	60	3000	White	Scattered	125_star_yellow_blue.jpg	126_star_yellow_yellow.jpg	11	21	126_star_yellow_yellow.jpg	Yellow	1	Congruent	1589	NA	125_star_yellow_blue.jpg 126_star_yellow_yellow.jpg	1	N	3.20112
Macaque	Monkey	Yellow	43411	44167	RMF-BoothDT1	Adv Pref FC	Izumi	Stroop_3_2_1.csv	10	290	2	60	3000	White	Scattered	107_fidget_spinner_blue.jpg	108_fidget_spinner_yellow.jpg	14	11	108_fidget_spinner_yellow.jpg	Yellow	1	Control	5609	NA	107_fidget_spinner_blue.jpg 108_fidget_spinner_yellow.jpg	1	N	3.74889
Macaque	Monkey	Yellow	43411	44167	RMF-BoothDT1	Adv Pref FC	Izumi	Stroop_3_2_1.csv	11	290	2	60	3000	White	Scattered	121_square_yellow_blue.jpg	122_square_yellow_yellow.jpg	25	20	122_square_yellow_yellow.jpg	Yellow	1	Congruent	3069	NA	121_square_yellow_blue.jpg 122_square_yellow_yellow.jpg	1	N	3.487
Macaque	Monkey	Yellow	43411	44167	RMF-BoothDT1	Adv Pref FC	Izumi	Stroop_3_2_1.csv	12	290	2	60	3000	White	Scattered	111_heart_blue_blue.jpg	112_heart_blue_yellow.jpg	14	23	112_heart_blue_yellow.jpg	Yellow	1	Incongruent	1521	NA	111_heart_blue_blue.jpg 112_heart_blue_yellow.jpg	1	N	3.18213
Macaque	Monkey	Yellow	43411	44167	RMF-BoothDT1	Adv Pref FC	Izumi	Stroop_3_2_1.csv	13	290	2	60	3000	White	Scattered	119_square_blue_blue.jpg	120_square_blue_yellow.jpg	20	22	120_square_blue_yellow.jpg	Yellow	1	Incongruent	1974	NA	119_square_blue_blue.jpg 120_square_blue_yellow.jpg	1	N	3.29535
Macaque	Monkey	Yellow	43411	44167	RMF-BoothDT1	Adv Pref FC	Izumi	Stroop_3_2_1.csv	14	290	2	60	3000	White	Scattered	113_heart_yellow_blue.jpg	114_heart_yellow_yellow.jpg	16	23	114_heart_yellow_yellow.jpg	Yellow	1	Congruent	3266	NA	113_heart_yellow_blue.jpg 114_heart_yellow_yellow.jpg	1	N	3.51402
Macaque	Monkey	Yellow	43411	44167	RMF-BoothDT1	Adv Pref FC	Izumi	Stroop_3_2_1.csv	15	290	2	60	3000	White	Scattered	109_fork_blue.jpg	110_fork_yellow.jpg	12	20	110_fork_yellow.jpg	Yellow	1	Control	5190	NA	109_fork_blue.jpg 110_fork_yellow.jpg	1	N	3.71517
Macaque	Monkey	Yellow	43411	44167	RMF-BoothDT1	Adv Pref FC	Izumi	Stroop_3_2_1.csv	16	290	2	60	3000	White	Scattered	111_heart_blue_blue.jpg	112_heart_blue_yellow.jpg	23	11	111_heart_blue_blue.jpg	Blue	0	Incongruent	1166	NA	111_heart_blue_blue.jpg 112_heart_blue_yellow.jpg	1	N	3.0667
Macaque	Monkey	Yellow	43411	44167	RMF-BoothDT1	Adv Pref FC	Izumi	Stroop_3_2_1.csv	17	290	2	60	3000	White	Scattered	103_cross_blue_blue.JPG	104_cross_blue_yellow.JPG	14	24	104_cross_blue_yellow.JPG	Yellow	1	Incongruent	2154	NA	103_cross_blue_blue.JPG 104_cross_blue_yellow.JPG	1	N	3.33325
Macaque	Monkey	Yellow	43411	44167	RMF-BoothDT1	Adv Pref FC	Izumi	Stroop_3_2_1.csv	18	290	2	60	3000	White	Scattered	101_bicycle_blue.JPG	102_bicycle_yellow.JPG	21	18	102_bicycle_yellow.JPG	Yellow	1	Control	4122	NA	101_bicycle_blue.JPG 102_bicycle_yellow.JPG	1	N	3.61511
Macaque	Monkey	Yellow	43411	44167	RMF-BoothDT1	Adv Pref FC	Izumi	Stroop_3_2_1.csv	19	290	2	60	3000	White	Scattered	105_cross_yellow_blue.jpg	106_cross_yellow_yellow.jpg	25	14	105_cross_yellow_blue.jpg	Blue	0	Congruent	2584	NA	105_cross_yellow_blue.jpg 106_cross_yellow_yellow.jpg	1	N	3.41229
Macaque	Monkey	Yellow	43411	44167	RMF-BoothDT1	Adv Pref FC	Izumi	Stroop_3_2_1.csv	20	290	2	60	3000	White	Scattered	117_shovel_blue.jpg	118_shovel_yellow.jpg	13	14	118_shovel_yellow.jpg	Yellow	1	Control	1796	NA	117_shovel_blue.jpg 118_shovel_yellow.jpg	1	N	3.25431
Macaque	Monkey	Yellow	43411	44167	RMF-BoothDT1	Adv Pref FC	Izumi	Stroop_3_2_1.csv	21	290	2	60	3000	White	Scattered	125_star_yellow_blue.jpg	126_star_yellow_yellow.jpg	16	15	125_star_yellow_blue.jpg	Blue	0	Congruent	1540	NA	125_star_yellow_blue.jpg 126_star_yellow_yellow.jpg	1	N	3.18752
Macaque	Monkey	Yellow	43411	44167	RMF-BoothDT1	Adv Pref FC	Izumi	Stroop_3_2_1.csv	22	290	2	60	3000	White	Scattered	101_bicycle_blue.JPG	102_bicycle_yellow.JPG	22	15	102_bicycle_yellow.JPG	Yellow	1	Control	3071	NA	101_bicycle_blue.JPG 102_bicycle_yellow.JPG	1	N	3.48728
Macaque	Monkey	Yellow	43411	44167	RMF-BoothDT1	Adv Pref FC	Izumi	Stroop_3_2_1.csv	23	290	2	60	3000	White	Scattered	113_heart_yellow_blue.jpg	114_heart_yellow_yellow.jpg	16	19	114_heart_yellow_yellow.jpg	Yellow	1	Congruent	4001	NA	113_heart_yellow_blue.jpg 114_heart_yellow_yellow.jpg	1	N	3.60217
Macaque	Monkey	Yellow	43411	44167	RMF-BoothDT1	Adv Pref FC	Izumi	Stroop_3_2_1.csv	24	290	2	60	3000	White	Scattered	119_square_blue_blue.jpg	120_square_blue_yellow.jpg	18	19	120_square_blue_yellow.jpg	Yellow	1	Incongruent	4231	NA	119_square_blue_blue.jpg 120_square_blue_yellow.jpg	1	N	3.62644
Macaque	Monkey	Yellow	43411	44167	RMF-BoothDT1	Adv Pref FC	Izumi	Stroop_3_2_1.csv	25	290	2	60	3000	White	Scattered	115_mug_blue.jpg	116_mug_yellow.jpg	24	16	115_mug_blue.jpg	Blue	0	Control	3393	NA	115_mug_blue.jpg 116_mug_yellow.jpg	1	N	3.53058
Macaque	Monkey	Yellow	43411	44167	RMF-BoothDT1	Adv Pref FC	Izumi	Stroop_3_2_1.csv	26	290	2	60	3000	White	Scattered	123_star_blue_blue.jpg	124_star_blue_yellow.jpg	15	12	124_star_blue_yellow.jpg	Yellow	1	Incongruent	3063	NA	123_star_blue_blue.jpg 124_star_blue_yellow.jpg	1	N	3.48615
Macaque	Monkey	Yellow	43411	44167	RMF-BoothDT1	Adv Pref FC	Izumi	Stroop_3_2_1.csv	27	290	2	60	3000	White	Scattered	105_cross_yellow_blue.jpg	106_cross_yellow_yellow.jpg	16	17	106_cross_yellow_yellow.jpg	Yellow	1	Congruent	4986	NA	105_cross_yellow_blue.jpg 106_cross_yellow_yellow.jpg	1	N	3.69775
Macaque	Monkey	Yellow	43411	44167	RMF-BoothDT1	Adv Pref FC	Izumi	Stroop_3_2_1.csv	28	290	2	60	3000	White	Scattered	107_fidget_spinner_blue.jpg	108_fidget_spinner_yellow.jpg	24	17	108_fidget_spinner_yellow.jpg	Yellow	1	Control	6059	NA	107_fidget_spinner_blue.jpg 108_fidget_spinner_yellow.jpg	1	Y	3.7824
Macaque	Monkey	Yellow	43411	44167	RMF-BoothDT1	Adv Pref FC	Izumi	Stroop_3_2_1.csv	29	290	2	60	3000	White	Scattered	119_square_blue_blue.jpg	120_square_blue_yellow.jpg	21	12	119_square_blue_blue.jpg	Blue	0	Incongruent	1148	NA	119_square_blue_blue.jpg 120_square_blue_yellow.jpg	1	N	3.05994
Macaque	Monkey	Yellow	43411	44167	RMF-BoothDT1	Adv Pref FC	Izumi	Stroop_3_2_1.csv	30	290	2	60	3000	White	Scattered	115_mug_blue.jpg	116_mug_yellow.jpg	20	15	115_mug_blue.jpg	Blue	0	Control	2907	NA	115_mug_blue.jpg 116_mug_yellow.jpg	1	N	3.46345
Macaque	Monkey	Yellow	43412	44156	RMF-BoothDT1	Adv Pref FC	Izumi	Stroop_3_2_2.csv	1	290	2	60	3000	White	Scattered	115_mug_blue.jpg	116_mug_yellow.jpg	23	13	116_mug_yellow.jpg	Yellow	1	Control	2512	NA	115_mug_blue.jpg 116_mug_yellow.jpg	2	N	3.40002
Macaque	Monkey	Yellow	43412	44156	RMF-BoothDT1	Adv Pref FC	Izumi	Stroop_3_2_2.csv	2	290	2	60	3000	White	Scattered	125_star_yellow_blue.jpg	126_star_yellow_yellow.jpg	24	13	125_star_yellow_blue.jpg	Blue	0	Congruent	1051	NA	125_star_yellow_blue.jpg 126_star_yellow_yellow.jpg	2	N	3.0216
Macaque	Monkey	Yellow	43412	44156	RMF-BoothDT1	Adv Pref FC	Izumi	Stroop_3_2_2.csv	3	290	2	60	3000	White	Scattered	109_fork_blue.jpg	110_fork_yellow.jpg	12	25	110_fork_yellow.jpg	Yellow	1	Control	1722	NA	109_fork_blue.jpg 110_fork_yellow.jpg	2	N	3.23603
Macaque	Monkey	Yellow	43412	44156	RMF-BoothDT1	Adv Pref FC	Izumi	Stroop_3_2_2.csv	4	290	2	60	3000	White	Scattered	123_star_blue_blue.jpg	124_star_blue_yellow.jpg	16	22	124_star_blue_yellow.jpg	Yellow	1	Incongruent	2142	NA	123_star_blue_blue.jpg 124_star_blue_yellow.jpg	2	N	3.33082
Macaque	Monkey	Yellow	43412	44156	RMF-BoothDT1	Adv Pref FC	Izumi	Stroop_3_2_2.csv	5	290	2	60	3000	White	Scattered	105_cross_yellow_blue.jpg	106_cross_yellow_yellow.jpg	17	14	105_cross_yellow_blue.jpg	Blue	0	Congruent	5256	NA	105_cross_yellow_blue.jpg 106_cross_yellow_yellow.jpg	2	N	3.72066
Macaque	Monkey	Yellow	43412	44156	RMF-BoothDT1	Adv Pref FC	Izumi	Stroop_3_2_2.csv	6	290	2	60	3000	White	Scattered	125_star_yellow_blue.jpg	126_star_yellow_yellow.jpg	15	16	126_star_yellow_yellow.jpg	Yellow	1	Congruent	2888	NA	125_star_yellow_blue.jpg 126_star_yellow_yellow.jpg	2	N	3.4606
Macaque	Monkey	Yellow	43412	44156	RMF-BoothDT1	Adv Pref FC	Izumi	Stroop_3_2_2.csv	7	290	2	60	3000	White	Scattered	115_mug_blue.jpg	116_mug_yellow.jpg	22	24	115_mug_blue.jpg	Blue	0	Control	1207	NA	115_mug_blue.jpg 116_mug_yellow.jpg	2	N	3.08171
Macaque	Monkey	Yellow	43412	44156	RMF-BoothDT1	Adv Pref FC	Izumi	Stroop_3_2_2.csv	8	290	2	60	3000	White	Scattered	111_heart_blue_blue.jpg	112_heart_blue_yellow.jpg	16	15	112_heart_blue_yellow.jpg	Yellow	1	Incongruent	2463	NA	111_heart_blue_blue.jpg 112_heart_blue_yellow.jpg	2	N	3.39146
Macaque	Monkey	Yellow	43412	44156	RMF-BoothDT1	Adv Pref FC	Izumi	Stroop_3_2_2.csv	9	290	2	60	3000	White	Scattered	121_square_yellow_blue.jpg	122_square_yellow_yellow.jpg	23	18	122_square_yellow_yellow.jpg	Yellow	1	Congruent	1585	NA	121_square_yellow_blue.jpg 122_square_yellow_yellow.jpg	2	N	3.20003
Macaque	Monkey	Yellow	43412	44156	RMF-BoothDT1	Adv Pref FC	Izumi	Stroop_3_2_2.csv	10	290	2	60	3000	White	Scattered	101_bicycle_blue.JPG	102_bicycle_yellow.JPG	23	12	102_bicycle_yellow.JPG	Yellow	1	Control	1936	NA	101_bicycle_blue.JPG 102_bicycle_yellow.JPG	2	N	3.28691
Macaque	Monkey	Yellow	43412	44156	RMF-BoothDT1	Adv Pref FC	Izumi	Stroop_3_2_2.csv	11	290	2	60	3000	White	Scattered	105_cross_yellow_blue.jpg	106_cross_yellow_yellow.jpg	17	14	106_cross_yellow_yellow.jpg	Yellow	1	Congruent	2792	NA	105_cross_yellow_blue.jpg 106_cross_yellow_yellow.jpg	2	N	3.44592
Macaque	Monkey	Yellow	43412	44156	RMF-BoothDT1	Adv Pref FC	Izumi	Stroop_3_2_2.csv	12	290	2	60	3000	White	Scattered	107_fidget_spinner_blue.jpg	108_fidget_spinner_yellow.jpg	11	18	108_fidget_spinner_yellow.jpg	Yellow	1	Control	1152	NA	107_fidget_spinner_blue.jpg 108_fidget_spinner_yellow.jpg	2	N	3.06145
Macaque	Monkey	Yellow	43412	44156	RMF-BoothDT1	Adv Pref FC	Izumi	Stroop_3_2_2.csv	13	290	2	60	3000	White	Scattered	125_star_yellow_blue.jpg	126_star_yellow_yellow.jpg	23	15	126_star_yellow_yellow.jpg	Yellow	1	Congruent	2859	NA	125_star_yellow_blue.jpg 126_star_yellow_yellow.jpg	2	N	3.45621
Macaque	Monkey	Yellow	43412	44156	RMF-BoothDT1	Adv Pref FC	Izumi	Stroop_3_2_2.csv	14	290	2	60	3000	White	Scattered	103_cross_blue_blue.JPG	104_cross_blue_yellow.JPG	22	19	104_cross_blue_yellow.JPG	Yellow	1	Incongruent	2801	NA	103_cross_blue_blue.JPG 104_cross_blue_yellow.JPG	2	N	3.44731
Macaque	Monkey	Yellow	43412	44156	RMF-BoothDT1	Adv Pref FC	Izumi	Stroop_3_2_2.csv	15	290	2	60	3000	White	Scattered	109_fork_blue.jpg	110_fork_yellow.jpg	11	23	110_fork_yellow.jpg	Yellow	1	Control	4406	NA	109_fork_blue.jpg 110_fork_yellow.jpg	2	N	3.64404
Macaque	Monkey	Yellow	43412	44156	RMF-BoothDT1	Adv Pref FC	Izumi	Stroop_3_2_2.csv	16	290	2	60	3000	White	Scattered	121_square_yellow_blue.jpg	122_square_yellow_yellow.jpg	21	20	122_square_yellow_yellow.jpg	Yellow	1	Congruent	1570	NA	121_square_yellow_blue.jpg 122_square_yellow_yellow.jpg	2	N	3.1959
Macaque	Monkey	Yellow	43412	44156	RMF-BoothDT1	Adv Pref FC	Izumi	Stroop_3_2_2.csv	17	290	2	60	3000	White	Scattered	119_square_blue_blue.jpg	120_square_blue_yellow.jpg	18	19	120_square_blue_yellow.jpg	Yellow	1	Incongruent	2046	NA	119_square_blue_blue.jpg 120_square_blue_yellow.jpg	2	N	3.31091
Macaque	Monkey	Yellow	43412	44156	RMF-BoothDT1	Adv Pref FC	Izumi	Stroop_3_2_2.csv	18	290	2	60	3000	White	Scattered	113_heart_yellow_blue.jpg	114_heart_yellow_yellow.jpg	12	20	114_heart_yellow_yellow.jpg	Yellow	1	Congruent	2890	NA	113_heart_yellow_blue.jpg 114_heart_yellow_yellow.jpg	2	N	3.4609
Macaque	Monkey	Yellow	43412	44156	RMF-BoothDT1	Adv Pref FC	Izumi	Stroop_3_2_2.csv	19	290	2	60	3000	White	Scattered	117_shovel_blue.jpg	118_shovel_yellow.jpg	17	18	118_shovel_yellow.jpg	Yellow	1	Control	860	NA	117_shovel_blue.jpg 118_shovel_yellow.jpg	2	N	2.9345
Macaque	Monkey	Yellow	43412	44156	RMF-BoothDT1	Adv Pref FC	Izumi	Stroop_3_2_2.csv	20	290	2	60	3000	White	Scattered	103_cross_blue_blue.JPG	104_cross_blue_yellow.JPG	20	11	103_cross_blue_blue.JPG	Blue	0	Incongruent	1674	NA	103_cross_blue_blue.JPG 104_cross_blue_yellow.JPG	2	N	3.22376
Macaque	Monkey	Yellow	43412	44156	RMF-BoothDT1	Adv Pref FC	Izumi	Stroop_3_2_2.csv	21	290	2	60	3000	White	Scattered	107_fidget_spinner_blue.jpg	108_fidget_spinner_yellow.jpg	16	25	107_fidget_spinner_blue.jpg	Blue	0	Control	1711	NA	107_fidget_spinner_blue.jpg 108_fidget_spinner_yellow.jpg	2	N	3.23325
Macaque	Monkey	Yellow	43412	44156	RMF-BoothDT1	Adv Pref FC	Izumi	Stroop_3_2_2.csv	22	290	2	60	3000	White	Scattered	123_star_blue_blue.jpg	124_star_blue_yellow.jpg	14	25	124_star_blue_yellow.jpg	Yellow	1	Incongruent	1625	NA	123_star_blue_blue.jpg 124_star_blue_yellow.jpg	2	N	3.21085
Macaque	Monkey	Yellow	43412	44156	RMF-BoothDT1	Adv Pref FC	Izumi	Stroop_3_2_2.csv	23	290	2	60	3000	White	Scattered	113_heart_yellow_blue.jpg	114_heart_yellow_yellow.jpg	16	12	114_heart_yellow_yellow.jpg	Yellow	1	Congruent	2443	NA	113_heart_yellow_blue.jpg 114_heart_yellow_yellow.jpg	2	N	3.38792
Macaque	Monkey	Yellow	43412	44156	RMF-BoothDT1	Adv Pref FC	Izumi	Stroop_3_2_2.csv	24	290	2	60	3000	White	Scattered	119_square_blue_blue.jpg	120_square_blue_yellow.jpg	25	21	120_square_blue_yellow.jpg	Yellow	1	Incongruent	1134	NA	119_square_blue_blue.jpg 120_square_blue_yellow.jpg	2	N	3.05461
Macaque	Monkey	Yellow	43412	44156	RMF-BoothDT1	Adv Pref FC	Izumi	Stroop_3_2_2.csv	25	290	2	60	3000	White	Scattered	117_shovel_blue.jpg	118_shovel_yellow.jpg	12	21	118_shovel_yellow.jpg	Yellow	1	Control	2311	NA	117_shovel_blue.jpg 118_shovel_yellow.jpg	2	N	3.3638
Macaque	Monkey	Yellow	43412	44156	RMF-BoothDT1	Adv Pref FC	Izumi	Stroop_3_2_2.csv	26	290	2	60	3000	White	Scattered	105_cross_yellow_blue.jpg	106_cross_yellow_yellow.jpg	24	11	105_cross_yellow_blue.jpg	Blue	0	Congruent	895	NA	105_cross_yellow_blue.jpg 106_cross_yellow_yellow.jpg	2	N	2.95182
Macaque	Monkey	Yellow	43412	44156	RMF-BoothDT1	Adv Pref FC	Izumi	Stroop_3_2_2.csv	27	290	2	60	3000	White	Scattered	123_star_blue_blue.jpg	124_star_blue_yellow.jpg	19	23	124_star_blue_yellow.jpg	Yellow	1	Incongruent	3120	NA	123_star_blue_blue.jpg 124_star_blue_yellow.jpg	2	N	3.49415
Macaque	Monkey	Yellow	43412	44156	RMF-BoothDT1	Adv Pref FC	Izumi	Stroop_3_2_2.csv	28	290	2	60	3000	White	Scattered	111_heart_blue_blue.jpg	112_heart_blue_yellow.jpg	23	25	112_heart_blue_yellow.jpg	Yellow	1	Incongruent	3445	NA	111_heart_blue_blue.jpg 112_heart_blue_yellow.jpg	2	N	3.53719
Macaque	Monkey	Yellow	43412	44156	RMF-BoothDT1	Adv Pref FC	Izumi	Stroop_3_2_2.csv	29	290	2	60	3000	White	Scattered	101_bicycle_blue.JPG	102_bicycle_yellow.JPG	16	23	102_bicycle_yellow.JPG	Yellow	1	Control	5482	NA	101_bicycle_blue.JPG 102_bicycle_yellow.JPG	2	N	3.73894
Macaque	Monkey	Yellow	43412	44156	RMF-BoothDT1	Adv Pref FC	Izumi	Stroop_3_2_2.csv	30	290	2	60	3000	White	Scattered	103_cross_blue_blue.JPG	104_cross_blue_yellow.JPG	11	21	104_cross_blue_yellow.JPG	Yellow	1	Incongruent	1810	NA	103_cross_blue_blue.JPG 104_cross_blue_yellow.JPG	2	N	3.25768
Macaque	Monkey	Yellow	43413	17838	MAC-Touch1	Adv Pref FC	Izumi	Stroop_3_2_3.csv	1	290	2	60	3000	White	Scattered	119_square_blue_blue.jpg	120_square_blue_yellow.jpg	18	25	120_square_blue_yellow.jpg	Yellow	1	Incongruent	1250	NA	119_square_blue_blue.jpg 120_square_blue_yellow.jpg	3	N	3.09691
Macaque	Monkey	Yellow	43413	17838	MAC-Touch1	Adv Pref FC	Izumi	Stroop_3_2_3.csv	2	290	2	60	3000	White	Scattered	125_star_yellow_blue.jpg	126_star_yellow_yellow.jpg	23	15	125_star_yellow_blue.jpg	Blue	0	Congruent	1722	NA	125_star_yellow_blue.jpg 126_star_yellow_yellow.jpg	3	N	3.23603
Macaque	Monkey	Yellow	43413	17838	MAC-Touch1	Adv Pref FC	Izumi	Stroop_3_2_3.csv	3	290	2	60	3000	White	Scattered	111_heart_blue_blue.jpg	112_heart_blue_yellow.jpg	17	12	112_heart_blue_yellow.jpg	Yellow	1	Incongruent	2420	NA	111_heart_blue_blue.jpg 112_heart_blue_yellow.jpg	3	N	3.38382
Macaque	Monkey	Yellow	43413	17838	MAC-Touch1	Adv Pref FC	Izumi	Stroop_3_2_3.csv	4	290	2	60	3000	White	Scattered	105_cross_yellow_blue.jpg	106_cross_yellow_yellow.jpg	14	23	106_cross_yellow_yellow.jpg	Yellow	1	Congruent	947	NA	105_cross_yellow_blue.jpg 106_cross_yellow_yellow.jpg	3	N	2.97635
Macaque	Monkey	Yellow	43413	17838	MAC-Touch1	Adv Pref FC	Izumi	Stroop_3_2_3.csv	5	290	2	60	3000	White	Scattered	115_mug_blue.jpg	116_mug_yellow.jpg	13	15	116_mug_yellow.jpg	Yellow	1	Control	2207	NA	115_mug_blue.jpg 116_mug_yellow.jpg	3	N	3.3438
Macaque	Monkey	Yellow	43413	17838	MAC-Touch1	Adv Pref FC	Izumi	Stroop_3_2_3.csv	6	290	2	60	3000	White	Scattered	113_heart_yellow_blue.jpg	114_heart_yellow_yellow.jpg	16	20	114_heart_yellow_yellow.jpg	Yellow	1	Congruent	3527	NA	113_heart_yellow_blue.jpg 114_heart_yellow_yellow.jpg	3	N	3.54741
Macaque	Monkey	Yellow	43413	17838	MAC-Touch1	Adv Pref FC	Izumi	Stroop_3_2_3.csv	7	290	2	60	3000	White	Scattered	103_cross_blue_blue.JPG	104_cross_blue_yellow.JPG	19	16	103_cross_blue_blue.JPG	Blue	0	Incongruent	2569	NA	103_cross_blue_blue.JPG 104_cross_blue_yellow.JPG	3	N	3.40976
Macaque	Monkey	Yellow	43413	17838	MAC-Touch1	Adv Pref FC	Izumi	Stroop_3_2_3.csv	8	290	2	60	3000	White	Scattered	101_bicycle_blue.JPG	102_bicycle_yellow.JPG	23	13	102_bicycle_yellow.JPG	Yellow	1	Control	2084	NA	101_bicycle_blue.JPG 102_bicycle_yellow.JPG	3	N	3.3189
Macaque	Monkey	Yellow	43413	17838	MAC-Touch1	Adv Pref FC	Izumi	Stroop_3_2_3.csv	9	290	2	60	3000	White	Scattered	103_cross_blue_blue.JPG	104_cross_blue_yellow.JPG	18	11	104_cross_blue_yellow.JPG	Yellow	1	Incongruent	1432	NA	103_cross_blue_blue.JPG 104_cross_blue_yellow.JPG	3	N	3.15594
Macaque	Monkey	Yellow	43413	17838	MAC-Touch1	Adv Pref FC	Izumi	Stroop_3_2_3.csv	10	290	2	60	3000	White	Scattered	109_fork_blue.jpg	110_fork_yellow.jpg	11	15	110_fork_yellow.jpg	Yellow	1	Control	4543	NA	109_fork_blue.jpg 110_fork_yellow.jpg	3	N	3.65734
Macaque	Monkey	Yellow	43413	17838	MAC-Touch1	Adv Pref FC	Izumi	Stroop_3_2_3.csv	11	290	2	60	3000	White	Scattered	123_star_blue_blue.jpg	124_star_blue_yellow.jpg	24	15	124_star_blue_yellow.jpg	Yellow	1	Incongruent	1257	NA	123_star_blue_blue.jpg 124_star_blue_yellow.jpg	3	N	3.09934
Macaque	Monkey	Yellow	43413	17838	MAC-Touch1	Adv Pref FC	Izumi	Stroop_3_2_3.csv	12	290	2	60	3000	White	Scattered	105_cross_yellow_blue.jpg	106_cross_yellow_yellow.jpg	11	13	106_cross_yellow_yellow.jpg	Yellow	1	Congruent	4314	NA	105_cross_yellow_blue.jpg 106_cross_yellow_yellow.jpg	3	N	3.63488
Macaque	Monkey	Yellow	43413	17838	MAC-Touch1	Adv Pref FC	Izumi	Stroop_3_2_3.csv	13	290	2	60	3000	White	Scattered	101_bicycle_blue.JPG	102_bicycle_yellow.JPG	13	12	102_bicycle_yellow.JPG	Yellow	1	Control	1784	NA	101_bicycle_blue.JPG 102_bicycle_yellow.JPG	3	N	3.25139
Macaque	Monkey	Yellow	43413	17838	MAC-Touch1	Adv Pref FC	Izumi	Stroop_3_2_3.csv	14	290	2	60	3000	White	Scattered	121_square_yellow_blue.jpg	122_square_yellow_yellow.jpg	14	17	122_square_yellow_yellow.jpg	Yellow	1	Congruent	3343	NA	121_square_yellow_blue.jpg 122_square_yellow_yellow.jpg	3	N	3.52414
Macaque	Monkey	Yellow	43413	17838	MAC-Touch1	Adv Pref FC	Izumi	Stroop_3_2_3.csv	15	290	2	60	3000	White	Scattered	119_square_blue_blue.jpg	120_square_blue_yellow.jpg	18	22	120_square_blue_yellow.jpg	Yellow	1	Incongruent	3174	NA	119_square_blue_blue.jpg 120_square_blue_yellow.jpg	3	N	3.50161
Macaque	Monkey	Yellow	43413	17838	MAC-Touch1	Adv Pref FC	Izumi	Stroop_3_2_3.csv	16	290	2	60	3000	White	Scattered	121_square_yellow_blue.jpg	122_square_yellow_yellow.jpg	12	15	122_square_yellow_yellow.jpg	Yellow	1	Congruent	3068	NA	121_square_yellow_blue.jpg 122_square_yellow_yellow.jpg	3	N	3.48686
Macaque	Monkey	Yellow	43413	17838	MAC-Touch1	Adv Pref FC	Izumi	Stroop_3_2_3.csv	17	290	2	60	3000	White	Scattered	109_fork_blue.jpg	110_fork_yellow.jpg	17	23	110_fork_yellow.jpg	Yellow	1	Control	1563	NA	109_fork_blue.jpg 110_fork_yellow.jpg	3	N	3.19396
Macaque	Monkey	Yellow	43413	17838	MAC-Touch1	Adv Pref FC	Izumi	Stroop_3_2_3.csv	18	290	2	60	3000	White	Scattered	111_heart_blue_blue.jpg	112_heart_blue_yellow.jpg	12	11	111_heart_blue_blue.jpg	Blue	0	Incongruent	4705	NA	111_heart_blue_blue.jpg 112_heart_blue_yellow.jpg	3	N	3.67256
Macaque	Monkey	Yellow	43413	17838	MAC-Touch1	Adv Pref FC	Izumi	Stroop_3_2_3.csv	19	290	2	60	3000	White	Scattered	107_fidget_spinner_blue.jpg	108_fidget_spinner_yellow.jpg	16	14	108_fidget_spinner_yellow.jpg	Yellow	1	Control	1180	NA	107_fidget_spinner_blue.jpg 108_fidget_spinner_yellow.jpg	3	N	3.07188
Macaque	Monkey	Yellow	43413	17838	MAC-Touch1	Adv Pref FC	Izumi	Stroop_3_2_3.csv	20	290	2	60	3000	White	Scattered	119_square_blue_blue.jpg	120_square_blue_yellow.jpg	19	24	120_square_blue_yellow.jpg	Yellow	1	Incongruent	3148	NA	119_square_blue_blue.jpg 120_square_blue_yellow.jpg	3	N	3.49803
Macaque	Monkey	Yellow	43413	17838	MAC-Touch1	Adv Pref FC	Izumi	Stroop_3_2_3.csv	21	290	2	60	3000	White	Scattered	121_square_yellow_blue.jpg	122_square_yellow_yellow.jpg	15	19	122_square_yellow_yellow.jpg	Yellow	1	Congruent	1073	NA	121_square_yellow_blue.jpg 122_square_yellow_yellow.jpg	3	N	3.0306
Macaque	Monkey	Yellow	43413	17838	MAC-Touch1	Adv Pref FC	Izumi	Stroop_3_2_3.csv	22	290	2	60	3000	White	Scattered	117_shovel_blue.jpg	118_shovel_yellow.jpg	14	16	118_shovel_yellow.jpg	Yellow	1	Control	2887	NA	117_shovel_blue.jpg 118_shovel_yellow.jpg	3	N	3.46045
Macaque	Monkey	Yellow	43413	17838	MAC-Touch1	Adv Pref FC	Izumi	Stroop_3_2_3.csv	23	290	2	60	3000	White	Scattered	113_heart_yellow_blue.jpg	114_heart_yellow_yellow.jpg	13	21	114_heart_yellow_yellow.jpg	Yellow	1	Congruent	3810	NA	113_heart_yellow_blue.jpg 114_heart_yellow_yellow.jpg	3	N	3.58092
Macaque	Monkey	Yellow	43413	17838	MAC-Touch1	Adv Pref FC	Izumi	Stroop_3_2_3.csv	24	290	2	60	3000	White	Scattered	115_mug_blue.jpg	116_mug_yellow.jpg	16	23	116_mug_yellow.jpg	Yellow	1	Control	1571	NA	115_mug_blue.jpg 116_mug_yellow.jpg	3	N	3.19618
Macaque	Monkey	Yellow	43413	17838	MAC-Touch1	Adv Pref FC	Izumi	Stroop_3_2_3.csv	25	290	2	60	3000	White	Scattered	111_heart_blue_blue.jpg	112_heart_blue_yellow.jpg	18	15	111_heart_blue_blue.jpg	Blue	0	Incongruent	3847	NA	111_heart_blue_blue.jpg 112_heart_blue_yellow.jpg	3	N	3.58512
Macaque	Monkey	Yellow	43413	17838	MAC-Touch1	Adv Pref FC	Izumi	Stroop_3_2_3.csv	26	290	2	60	3000	White	Scattered	125_star_yellow_blue.jpg	126_star_yellow_yellow.jpg	14	25	126_star_yellow_yellow.jpg	Yellow	1	Congruent	1451	NA	125_star_yellow_blue.jpg 126_star_yellow_yellow.jpg	3	N	3.16167
Macaque	Monkey	Yellow	43413	17838	MAC-Touch1	Adv Pref FC	Izumi	Stroop_3_2_3.csv	27	290	2	60	3000	White	Scattered	117_shovel_blue.jpg	118_shovel_yellow.jpg	11	14	118_shovel_yellow.jpg	Yellow	1	Control	1367	NA	117_shovel_blue.jpg 118_shovel_yellow.jpg	3	N	3.13577
Macaque	Monkey	Yellow	43413	17838	MAC-Touch1	Adv Pref FC	Izumi	Stroop_3_2_3.csv	28	290	2	60	3000	White	Scattered	113_heart_yellow_blue.jpg	114_heart_yellow_yellow.jpg	20	18	114_heart_yellow_yellow.jpg	Yellow	1	Congruent	3542	NA	113_heart_yellow_blue.jpg 114_heart_yellow_yellow.jpg	3	N	3.54925
Macaque	Monkey	Yellow	43413	17838	MAC-Touch1	Adv Pref FC	Izumi	Stroop_3_2_3.csv	29	290	2	60	3000	White	Scattered	107_fidget_spinner_blue.jpg	108_fidget_spinner_yellow.jpg	11	19	108_fidget_spinner_yellow.jpg	Yellow	1	Control	928	NA	107_fidget_spinner_blue.jpg 108_fidget_spinner_yellow.jpg	3	N	2.96755
Macaque	Monkey	Yellow	43413	17838	MAC-Touch1	Adv Pref FC	Izumi	Stroop_3_2_3.csv	30	290	2	60	3000	White	Scattered	123_star_blue_blue.jpg	124_star_blue_yellow.jpg	15	23	124_star_blue_yellow.jpg	Yellow	1	Incongruent	1831	NA	123_star_blue_blue.jpg 124_star_blue_yellow.jpg	3	N	3.26269
Macaque	Monkey	Yellow	43416	12724	RMF-BoothDT1	Adv Pref FC	Izumi	Stroop_3_2_4.csv	1	290	2	60	3000	White	Scattered	123_star_blue_blue.jpg	124_star_blue_yellow.jpg	17	12	124_star_blue_yellow.jpg	Yellow	1	Incongruent	1417	NA	123_star_blue_blue.jpg 124_star_blue_yellow.jpg	4	N	3.15137
Macaque	Monkey	Yellow	43416	12724	RMF-BoothDT1	Adv Pref FC	Izumi	Stroop_3_2_4.csv	2	290	2	60	3000	White	Scattered	115_mug_blue.jpg	116_mug_yellow.jpg	14	12	115_mug_blue.jpg	Blue	0	Control	1250	NA	115_mug_blue.jpg 116_mug_yellow.jpg	4	N	3.09691
Macaque	Monkey	Yellow	43416	12724	RMF-BoothDT1	Adv Pref FC	Izumi	Stroop_3_2_4.csv	3	290	2	60	3000	White	Scattered	105_cross_yellow_blue.jpg	106_cross_yellow_yellow.jpg	15	14	105_cross_yellow_blue.jpg	Blue	0	Congruent	1917	NA	105_cross_yellow_blue.jpg 106_cross_yellow_yellow.jpg	4	N	3.28262
Macaque	Monkey	Yellow	43416	12724	RMF-BoothDT1	Adv Pref FC	Izumi	Stroop_3_2_4.csv	4	290	2	60	3000	White	Scattered	109_fork_blue.jpg	110_fork_yellow.jpg	20	14	110_fork_yellow.jpg	Yellow	1	Control	1882	NA	109_fork_blue.jpg 110_fork_yellow.jpg	4	N	3.27462
Macaque	Monkey	Yellow	43416	12724	RMF-BoothDT1	Adv Pref FC	Izumi	Stroop_3_2_4.csv	5	290	2	60	3000	White	Scattered	123_star_blue_blue.jpg	124_star_blue_yellow.jpg	19	17	124_star_blue_yellow.jpg	Yellow	1	Incongruent	2115	NA	123_star_blue_blue.jpg 124_star_blue_yellow.jpg	4	N	3.32531
Macaque	Monkey	Yellow	43416	12724	RMF-BoothDT1	Adv Pref FC	Izumi	Stroop_3_2_4.csv	6	290	2	60	3000	White	Scattered	113_heart_yellow_blue.jpg	114_heart_yellow_yellow.jpg	11	22	114_heart_yellow_yellow.jpg	Yellow	1	Congruent	2551	NA	113_heart_yellow_blue.jpg 114_heart_yellow_yellow.jpg	4	N	3.40671
Macaque	Monkey	Yellow	43416	12724	RMF-BoothDT1	Adv Pref FC	Izumi	Stroop_3_2_4.csv	7	290	2	60	3000	White	Scattered	117_shovel_blue.jpg	118_shovel_yellow.jpg	15	24	118_shovel_yellow.jpg	Yellow	1	Control	3513	NA	117_shovel_blue.jpg 118_shovel_yellow.jpg	4	N	3.54568
Macaque	Monkey	Yellow	43416	12724	RMF-BoothDT1	Adv Pref FC	Izumi	Stroop_3_2_4.csv	8	290	2	60	3000	White	Scattered	125_star_yellow_blue.jpg	126_star_yellow_yellow.jpg	17	18	126_star_yellow_yellow.jpg	Yellow	1	Congruent	2172	NA	125_star_yellow_blue.jpg 126_star_yellow_yellow.jpg	4	N	3.33686
Macaque	Monkey	Yellow	43416	12724	RMF-BoothDT1	Adv Pref FC	Izumi	Stroop_3_2_4.csv	9	290	2	60	3000	White	Scattered	109_fork_blue.jpg	110_fork_yellow.jpg	25	15	110_fork_yellow.jpg	Yellow	1	Control	2568	NA	109_fork_blue.jpg 110_fork_yellow.jpg	4	N	3.4096
Macaque	Monkey	Yellow	43416	12724	RMF-BoothDT1	Adv Pref FC	Izumi	Stroop_3_2_4.csv	10	290	2	60	3000	White	Scattered	113_heart_yellow_blue.jpg	114_heart_yellow_yellow.jpg	23	18	113_heart_yellow_blue.jpg	Blue	0	Congruent	1281	NA	113_heart_yellow_blue.jpg 114_heart_yellow_yellow.jpg	4	N	3.10755
Macaque	Monkey	Yellow	43416	12724	RMF-BoothDT1	Adv Pref FC	Izumi	Stroop_3_2_4.csv	11	290	2	60	3000	White	Scattered	111_heart_blue_blue.jpg	112_heart_blue_yellow.jpg	22	12	111_heart_blue_blue.jpg	Blue	0	Incongruent	1002	NA	111_heart_blue_blue.jpg 112_heart_blue_yellow.jpg	4	N	3.00087
Macaque	Monkey	Yellow	43416	12724	RMF-BoothDT1	Adv Pref FC	Izumi	Stroop_3_2_4.csv	12	290	2	60	3000	White	Scattered	119_square_blue_blue.jpg	120_square_blue_yellow.jpg	13	25	120_square_blue_yellow.jpg	Yellow	1	Incongruent	1210	NA	119_square_blue_blue.jpg 120_square_blue_yellow.jpg	4	N	3.08279
Macaque	Monkey	Yellow	43416	12724	RMF-BoothDT1	Adv Pref FC	Izumi	Stroop_3_2_4.csv	13	290	2	60	3000	White	Scattered	105_cross_yellow_blue.jpg	106_cross_yellow_yellow.jpg	24	11	105_cross_yellow_blue.jpg	Blue	0	Congruent	2677	NA	105_cross_yellow_blue.jpg 106_cross_yellow_yellow.jpg	4	N	3.42765
Macaque	Monkey	Yellow	43416	12724	RMF-BoothDT1	Adv Pref FC	Izumi	Stroop_3_2_4.csv	14	290	2	60	3000	White	Scattered	101_bicycle_blue.JPG	102_bicycle_yellow.JPG	23	20	102_bicycle_yellow.JPG	Yellow	1	Control	1819	NA	101_bicycle_blue.JPG 102_bicycle_yellow.JPG	4	N	3.25983
Macaque	Monkey	Yellow	43416	12724	RMF-BoothDT1	Adv Pref FC	Izumi	Stroop_3_2_4.csv	15	290	2	60	3000	White	Scattered	119_square_blue_blue.jpg	120_square_blue_yellow.jpg	17	22	120_square_blue_yellow.jpg	Yellow	1	Incongruent	1393	NA	119_square_blue_blue.jpg 120_square_blue_yellow.jpg	4	N	3.14395
Macaque	Monkey	Yellow	43416	12724	RMF-BoothDT1	Adv Pref FC	Izumi	Stroop_3_2_4.csv	16	290	2	60	3000	White	Scattered	105_cross_yellow_blue.jpg	106_cross_yellow_yellow.jpg	13	20	106_cross_yellow_yellow.jpg	Yellow	1	Congruent	3475	NA	105_cross_yellow_blue.jpg 106_cross_yellow_yellow.jpg	4	N	3.54095
Macaque	Monkey	Yellow	43416	12724	RMF-BoothDT1	Adv Pref FC	Izumi	Stroop_3_2_4.csv	17	290	2	60	3000	White	Scattered	103_cross_blue_blue.JPG	104_cross_blue_yellow.JPG	12	15	104_cross_blue_yellow.JPG	Yellow	1	Incongruent	1378	NA	103_cross_blue_blue.JPG 104_cross_blue_yellow.JPG	4	N	3.13925
Macaque	Monkey	Yellow	43416	12724	RMF-BoothDT1	Adv Pref FC	Izumi	Stroop_3_2_4.csv	18	290	2	60	3000	White	Scattered	115_mug_blue.jpg	116_mug_yellow.jpg	16	11	115_mug_blue.jpg	Blue	0	Control	1780	NA	115_mug_blue.jpg 116_mug_yellow.jpg	4	N	3.25042
Macaque	Monkey	Yellow	43416	12724	RMF-BoothDT1	Adv Pref FC	Izumi	Stroop_3_2_4.csv	19	290	2	60	3000	White	Scattered	125_star_yellow_blue.jpg	126_star_yellow_yellow.jpg	17	18	126_star_yellow_yellow.jpg	Yellow	1	Congruent	4093	NA	125_star_yellow_blue.jpg 126_star_yellow_yellow.jpg	4	N	3.61204
Macaque	Monkey	Yellow	43416	12724	RMF-BoothDT1	Adv Pref FC	Izumi	Stroop_3_2_4.csv	20	290	2	60	3000	White	Scattered	107_fidget_spinner_blue.jpg	108_fidget_spinner_yellow.jpg	11	15	108_fidget_spinner_yellow.jpg	Yellow	1	Control	1961	NA	107_fidget_spinner_blue.jpg 108_fidget_spinner_yellow.jpg	4	N	3.29248
Macaque	Monkey	Yellow	43416	12724	RMF-BoothDT1	Adv Pref FC	Izumi	Stroop_3_2_4.csv	21	290	2	60	3000	White	Scattered	123_star_blue_blue.jpg	124_star_blue_yellow.jpg	15	25	124_star_blue_yellow.jpg	Yellow	1	Incongruent	2373	NA	123_star_blue_blue.jpg 124_star_blue_yellow.jpg	4	N	3.3753
Macaque	Monkey	Yellow	43416	12724	RMF-BoothDT1	Adv Pref FC	Izumi	Stroop_3_2_4.csv	22	290	2	60	3000	White	Scattered	101_bicycle_blue.JPG	102_bicycle_yellow.JPG	23	21	102_bicycle_yellow.JPG	Yellow	1	Control	3589	NA	101_bicycle_blue.JPG 102_bicycle_yellow.JPG	4	N	3.55497
Macaque	Monkey	Yellow	43416	12724	RMF-BoothDT1	Adv Pref FC	Izumi	Stroop_3_2_4.csv	23	290	2	60	3000	White	Scattered	121_square_yellow_blue.jpg	122_square_yellow_yellow.jpg	12	14	122_square_yellow_yellow.jpg	Yellow	1	Congruent	7110	NA	121_square_yellow_blue.jpg 122_square_yellow_yellow.jpg	4	Y	3.85187
Macaque	Monkey	Yellow	43416	12724	RMF-BoothDT1	Adv Pref FC	Izumi	Stroop_3_2_4.csv	24	290	2	60	3000	White	Scattered	111_heart_blue_blue.jpg	112_heart_blue_yellow.jpg	13	17	112_heart_blue_yellow.jpg	Yellow	1	Incongruent	4091	NA	111_heart_blue_blue.jpg 112_heart_blue_yellow.jpg	4	N	3.61183
Macaque	Monkey	Yellow	43416	12724	RMF-BoothDT1	Adv Pref FC	Izumi	Stroop_3_2_4.csv	25	290	2	60	3000	White	Scattered	107_fidget_spinner_blue.jpg	108_fidget_spinner_yellow.jpg	16	19	108_fidget_spinner_yellow.jpg	Yellow	1	Control	4120	NA	107_fidget_spinner_blue.jpg 108_fidget_spinner_yellow.jpg	4	N	3.6149
Macaque	Monkey	Yellow	43416	12724	RMF-BoothDT1	Adv Pref FC	Izumi	Stroop_3_2_4.csv	26	290	2	60	3000	White	Scattered	103_cross_blue_blue.JPG	104_cross_blue_yellow.JPG	20	19	104_cross_blue_yellow.JPG	Yellow	1	Incongruent	1867	NA	103_cross_blue_blue.JPG 104_cross_blue_yellow.JPG	4	N	3.27114
Macaque	Monkey	Yellow	43416	12724	RMF-BoothDT1	Adv Pref FC	Izumi	Stroop_3_2_4.csv	27	290	2	60	3000	White	Scattered	125_star_yellow_blue.jpg	126_star_yellow_yellow.jpg	25	16	126_star_yellow_yellow.jpg	Yellow	1	Congruent	1201	NA	125_star_yellow_blue.jpg 126_star_yellow_yellow.jpg	4	N	3.07954
Macaque	Monkey	Yellow	43416	12724	RMF-BoothDT1	Adv Pref FC	Izumi	Stroop_3_2_4.csv	28	290	2	60	3000	White	Scattered	117_shovel_blue.jpg	118_shovel_yellow.jpg	21	20	118_shovel_yellow.jpg	Yellow	1	Control	1947	NA	117_shovel_blue.jpg 118_shovel_yellow.jpg	4	N	3.28937
Macaque	Monkey	Yellow	43416	12724	RMF-BoothDT1	Adv Pref FC	Izumi	Stroop_3_2_4.csv	29	290	2	60	3000	White	Scattered	121_square_yellow_blue.jpg	122_square_yellow_yellow.jpg	13	23	122_square_yellow_yellow.jpg	Yellow	1	Congruent	2054	NA	121_square_yellow_blue.jpg 122_square_yellow_yellow.jpg	4	N	3.3126
Macaque	Monkey	Yellow	43416	12724	RMF-BoothDT1	Adv Pref FC	Izumi	Stroop_3_2_4.csv	30	290	2	60	3000	White	Scattered	103_cross_blue_blue.JPG	104_cross_blue_yellow.JPG	14	23	104_cross_blue_yellow.JPG	Yellow	1	Incongruent	2701	NA	103_cross_blue_blue.JPG 104_cross_blue_yellow.JPG	4	N	3.43152
Macaque	Monkey	Yellow	43437	13089	MAC-Touch1	Adv Pref FC	Izumi	Stroop_3_2_1.csv	1	290	2	60	3000	White	Scattered	113_heart_yellow_blue.jpg	114_heart_yellow_yellow.jpg	17	22	113_heart_yellow_blue.jpg	Blue	0	Congruent	1771	NA	113_heart_yellow_blue.jpg 114_heart_yellow_yellow.jpg	5	N	3.24822
Macaque	Monkey	Yellow	43437	13089	MAC-Touch1	Adv Pref FC	Izumi	Stroop_3_2_1.csv	2	290	2	60	3000	White	Scattered	103_cross_blue_blue.JPG	104_cross_blue_yellow.JPG	21	20	104_cross_blue_yellow.JPG	Yellow	1	Incongruent	1150	NA	103_cross_blue_blue.JPG 104_cross_blue_yellow.JPG	5	N	3.0607
Macaque	Monkey	Yellow	43437	13089	MAC-Touch1	Adv Pref FC	Izumi	Stroop_3_2_1.csv	3	290	2	60	3000	White	Scattered	121_square_yellow_blue.jpg	122_square_yellow_yellow.jpg	13	22	122_square_yellow_yellow.jpg	Yellow	1	Congruent	4060	NA	121_square_yellow_blue.jpg 122_square_yellow_yellow.jpg	5	N	3.60853
Macaque	Monkey	Yellow	43437	13089	MAC-Touch1	Adv Pref FC	Izumi	Stroop_3_2_1.csv	4	290	2	60	3000	White	Scattered	117_shovel_blue.jpg	118_shovel_yellow.jpg	22	12	117_shovel_blue.jpg	Blue	0	Control	13346	NA	117_shovel_blue.jpg 118_shovel_yellow.jpg	5	Y	4.12535
Macaque	Monkey	Yellow	43437	13089	MAC-Touch1	Adv Pref FC	Izumi	Stroop_3_2_1.csv	5	290	2	60	3000	White	Scattered	123_star_blue_blue.jpg	124_star_blue_yellow.jpg	13	17	124_star_blue_yellow.jpg	Yellow	1	Incongruent	10822	NA	123_star_blue_blue.jpg 124_star_blue_yellow.jpg	5	Y	4.03431
Macaque	Monkey	Yellow	43437	13089	MAC-Touch1	Adv Pref FC	Izumi	Stroop_3_2_1.csv	6	290	2	60	3000	White	Scattered	109_fork_blue.jpg	110_fork_yellow.jpg	16	19	110_fork_yellow.jpg	Yellow	1	Control	6075	NA	109_fork_blue.jpg 110_fork_yellow.jpg	5	Y	3.78355
Macaque	Monkey	Yellow	43437	13089	MAC-Touch1	Adv Pref FC	Izumi	Stroop_3_2_1.csv	7	290	2	60	3000	White	Scattered	121_square_yellow_blue.jpg	122_square_yellow_yellow.jpg	14	23	122_square_yellow_yellow.jpg	Yellow	1	Congruent	3601	NA	121_square_yellow_blue.jpg 122_square_yellow_yellow.jpg	5	N	3.55642
Macaque	Monkey	Yellow	43437	13089	MAC-Touch1	Adv Pref FC	Izumi	Stroop_3_2_1.csv	8	290	2	60	3000	White	Scattered	111_heart_blue_blue.jpg	112_heart_blue_yellow.jpg	25	22	112_heart_blue_yellow.jpg	Yellow	1	Incongruent	5822	NA	111_heart_blue_blue.jpg 112_heart_blue_yellow.jpg	5	N	3.76507
Macaque	Monkey	Yellow	43437	13089	MAC-Touch1	Adv Pref FC	Izumi	Stroop_3_2_1.csv	9	290	2	60	3000	White	Scattered	125_star_yellow_blue.jpg	126_star_yellow_yellow.jpg	24	15	125_star_yellow_blue.jpg	Blue	0	Congruent	1485	NA	125_star_yellow_blue.jpg 126_star_yellow_yellow.jpg	5	N	3.17173
Macaque	Monkey	Yellow	43437	13089	MAC-Touch1	Adv Pref FC	Izumi	Stroop_3_2_1.csv	10	290	2	60	3000	White	Scattered	107_fidget_spinner_blue.jpg	108_fidget_spinner_yellow.jpg	21	19	108_fidget_spinner_yellow.jpg	Yellow	1	Control	1991	NA	107_fidget_spinner_blue.jpg 108_fidget_spinner_yellow.jpg	5	N	3.29907
Macaque	Monkey	Yellow	43437	13089	MAC-Touch1	Adv Pref FC	Izumi	Stroop_3_2_1.csv	11	290	2	60	3000	White	Scattered	121_square_yellow_blue.jpg	122_square_yellow_yellow.jpg	23	12	121_square_yellow_blue.jpg	Blue	0	Congruent	1073	NA	121_square_yellow_blue.jpg 122_square_yellow_yellow.jpg	5	N	3.0306
Macaque	Monkey	Yellow	43437	13089	MAC-Touch1	Adv Pref FC	Izumi	Stroop_3_2_1.csv	12	290	2	60	3000	White	Scattered	111_heart_blue_blue.jpg	112_heart_blue_yellow.jpg	24	14	111_heart_blue_blue.jpg	Blue	0	Incongruent	1830	NA	111_heart_blue_blue.jpg 112_heart_blue_yellow.jpg	5	N	3.26245
Macaque	Monkey	Yellow	43437	13089	MAC-Touch1	Adv Pref FC	Izumi	Stroop_3_2_1.csv	13	290	2	60	3000	White	Scattered	119_square_blue_blue.jpg	120_square_blue_yellow.jpg	24	15	120_square_blue_yellow.jpg	Yellow	1	Incongruent	2254	NA	119_square_blue_blue.jpg 120_square_blue_yellow.jpg	5	N	3.35295
Macaque	Monkey	Yellow	43437	13089	MAC-Touch1	Adv Pref FC	Izumi	Stroop_3_2_1.csv	14	290	2	60	3000	White	Scattered	113_heart_yellow_blue.jpg	114_heart_yellow_yellow.jpg	21	12	113_heart_yellow_blue.jpg	Blue	0	Congruent	2297	NA	113_heart_yellow_blue.jpg 114_heart_yellow_yellow.jpg	5	N	3.36116
Macaque	Monkey	Yellow	43437	13089	MAC-Touch1	Adv Pref FC	Izumi	Stroop_3_2_1.csv	15	290	2	60	3000	White	Scattered	109_fork_blue.jpg	110_fork_yellow.jpg	12	22	110_fork_yellow.jpg	Yellow	1	Control	1240	NA	109_fork_blue.jpg 110_fork_yellow.jpg	5	N	3.09342
Macaque	Monkey	Yellow	43437	13089	MAC-Touch1	Adv Pref FC	Izumi	Stroop_3_2_1.csv	16	290	2	60	3000	White	Scattered	111_heart_blue_blue.jpg	112_heart_blue_yellow.jpg	23	18	112_heart_blue_yellow.jpg	Yellow	1	Incongruent	4994	NA	111_heart_blue_blue.jpg 112_heart_blue_yellow.jpg	5	N	3.69845
Macaque	Monkey	Yellow	43437	13089	MAC-Touch1	Adv Pref FC	Izumi	Stroop_3_2_1.csv	17	290	2	60	3000	White	Scattered	103_cross_blue_blue.JPG	104_cross_blue_yellow.JPG	23	15	103_cross_blue_blue.JPG	Blue	0	Incongruent	736	NA	103_cross_blue_blue.JPG 104_cross_blue_yellow.JPG	5	N	2.86688
Macaque	Monkey	Yellow	43437	13089	MAC-Touch1	Adv Pref FC	Izumi	Stroop_3_2_1.csv	18	290	2	60	3000	White	Scattered	101_bicycle_blue.JPG	102_bicycle_yellow.JPG	16	22	102_bicycle_yellow.JPG	Yellow	1	Control	5035	NA	101_bicycle_blue.JPG 102_bicycle_yellow.JPG	5	N	3.702
Macaque	Monkey	Yellow	43437	13089	MAC-Touch1	Adv Pref FC	Izumi	Stroop_3_2_1.csv	19	290	2	60	3000	White	Scattered	105_cross_yellow_blue.jpg	106_cross_yellow_yellow.jpg	20	19	105_cross_yellow_blue.jpg	Blue	0	Congruent	971	NA	105_cross_yellow_blue.jpg 106_cross_yellow_yellow.jpg	5	N	2.98722
Macaque	Monkey	Yellow	43437	13089	MAC-Touch1	Adv Pref FC	Izumi	Stroop_3_2_1.csv	20	290	2	60	3000	White	Scattered	117_shovel_blue.jpg	118_shovel_yellow.jpg	17	25	118_shovel_yellow.jpg	Yellow	1	Control	1100	NA	117_shovel_blue.jpg 118_shovel_yellow.jpg	5	N	3.04139
Macaque	Monkey	Yellow	43437	13089	MAC-Touch1	Adv Pref FC	Izumi	Stroop_3_2_1.csv	21	290	2	60	3000	White	Scattered	125_star_yellow_blue.jpg	126_star_yellow_yellow.jpg	17	14	126_star_yellow_yellow.jpg	Yellow	1	Congruent	11361	NA	125_star_yellow_blue.jpg 126_star_yellow_yellow.jpg	5	Y	4.05542
Macaque	Monkey	Yellow	43437	13089	MAC-Touch1	Adv Pref FC	Izumi	Stroop_3_2_1.csv	22	290	2	60	3000	White	Scattered	101_bicycle_blue.JPG	102_bicycle_yellow.JPG	23	24	102_bicycle_yellow.JPG	Yellow	1	Control	1832	NA	101_bicycle_blue.JPG 102_bicycle_yellow.JPG	5	N	3.26293
Macaque	Monkey	Yellow	43437	13089	MAC-Touch1	Adv Pref FC	Izumi	Stroop_3_2_1.csv	23	290	2	60	3000	White	Scattered	113_heart_yellow_blue.jpg	114_heart_yellow_yellow.jpg	21	22	114_heart_yellow_yellow.jpg	Yellow	1	Congruent	6971	NA	113_heart_yellow_blue.jpg 114_heart_yellow_yellow.jpg	5	Y	3.8433
Macaque	Monkey	Yellow	43437	13089	MAC-Touch1	Adv Pref FC	Izumi	Stroop_3_2_1.csv	24	290	2	60	3000	White	Scattered	119_square_blue_blue.jpg	120_square_blue_yellow.jpg	15	23	120_square_blue_yellow.jpg	Yellow	1	Incongruent	3819	NA	119_square_blue_blue.jpg 120_square_blue_yellow.jpg	5	N	3.58195
Macaque	Monkey	Yellow	43437	13089	MAC-Touch1	Adv Pref FC	Izumi	Stroop_3_2_1.csv	25	290	2	60	3000	White	Scattered	115_mug_blue.jpg	116_mug_yellow.jpg	12	19	116_mug_yellow.jpg	Yellow	1	Control	2707	NA	115_mug_blue.jpg 116_mug_yellow.jpg	5	N	3.43249
Macaque	Monkey	Yellow	43437	13089	MAC-Touch1	Adv Pref FC	Izumi	Stroop_3_2_1.csv	26	290	2	60	3000	White	Scattered	123_star_blue_blue.jpg	124_star_blue_yellow.jpg	16	11	124_star_blue_yellow.jpg	Yellow	1	Incongruent	7886	NA	123_star_blue_blue.jpg 124_star_blue_yellow.jpg	5	Y	3.89686
Macaque	Monkey	Yellow	43437	13089	MAC-Touch1	Adv Pref FC	Izumi	Stroop_3_2_1.csv	27	290	2	60	3000	White	Scattered	105_cross_yellow_blue.jpg	106_cross_yellow_yellow.jpg	17	16	106_cross_yellow_yellow.jpg	Yellow	1	Congruent	4051	NA	105_cross_yellow_blue.jpg 106_cross_yellow_yellow.jpg	5	N	3.60756
Macaque	Monkey	Yellow	43437	13089	MAC-Touch1	Adv Pref FC	Izumi	Stroop_3_2_1.csv	28	290	2	60	3000	White	Scattered	107_fidget_spinner_blue.jpg	108_fidget_spinner_yellow.jpg	12	16	108_fidget_spinner_yellow.jpg	Yellow	1	Control	1649	NA	107_fidget_spinner_blue.jpg 108_fidget_spinner_yellow.jpg	5	N	3.21722
Macaque	Monkey	Yellow	43437	13089	MAC-Touch1	Adv Pref FC	Izumi	Stroop_3_2_1.csv	29	290	2	60	3000	White	Scattered	119_square_blue_blue.jpg	120_square_blue_yellow.jpg	18	20	120_square_blue_yellow.jpg	Yellow	1	Incongruent	1218	NA	119_square_blue_blue.jpg 120_square_blue_yellow.jpg	5	N	3.08565
Macaque	Monkey	Yellow	43437	13089	MAC-Touch1	Adv Pref FC	Izumi	Stroop_3_2_1.csv	30	290	2	60	3000	White	Scattered	115_mug_blue.jpg	116_mug_yellow.jpg	17	25	116_mug_yellow.jpg	Yellow	1	Control	2618	NA	115_mug_blue.jpg 116_mug_yellow.jpg	5	N	3.41797
Macaque	Monkey	Yellow	43438	13820	RMF-BoothDT1	Adv Pref FC	Izumi	Stroop_3_2_2.csv	1	290	2	60	3000	White	Scattered	115_mug_blue.jpg	116_mug_yellow.jpg	19	25	116_mug_yellow.jpg	Yellow	1	Control	1393	NA	115_mug_blue.jpg 116_mug_yellow.jpg	6	N	3.14395
Macaque	Monkey	Yellow	43438	13820	RMF-BoothDT1	Adv Pref FC	Izumi	Stroop_3_2_2.csv	2	290	2	60	3000	White	Scattered	125_star_yellow_blue.jpg	126_star_yellow_yellow.jpg	21	25	125_star_yellow_blue.jpg	Blue	0	Congruent	1760	NA	125_star_yellow_blue.jpg 126_star_yellow_yellow.jpg	6	N	3.24551
Macaque	Monkey	Yellow	43438	13820	RMF-BoothDT1	Adv Pref FC	Izumi	Stroop_3_2_2.csv	3	290	2	60	3000	White	Scattered	109_fork_blue.jpg	110_fork_yellow.jpg	19	13	110_fork_yellow.jpg	Yellow	1	Control	3032	NA	109_fork_blue.jpg 110_fork_yellow.jpg	6	N	3.48173
Macaque	Monkey	Yellow	43438	13820	RMF-BoothDT1	Adv Pref FC	Izumi	Stroop_3_2_2.csv	4	290	2	60	3000	White	Scattered	123_star_blue_blue.jpg	124_star_blue_yellow.jpg	20	23	124_star_blue_yellow.jpg	Yellow	1	Incongruent	4473	NA	123_star_blue_blue.jpg 124_star_blue_yellow.jpg	6	N	3.6506
Macaque	Monkey	Yellow	43438	13820	RMF-BoothDT1	Adv Pref FC	Izumi	Stroop_3_2_2.csv	5	290	2	60	3000	White	Scattered	105_cross_yellow_blue.jpg	106_cross_yellow_yellow.jpg	17	14	105_cross_yellow_blue.jpg	Blue	0	Congruent	2627	NA	105_cross_yellow_blue.jpg 106_cross_yellow_yellow.jpg	6	N	3.41946
Macaque	Monkey	Yellow	43438	13820	RMF-BoothDT1	Adv Pref FC	Izumi	Stroop_3_2_2.csv	6	290	2	60	3000	White	Scattered	125_star_yellow_blue.jpg	126_star_yellow_yellow.jpg	13	20	126_star_yellow_yellow.jpg	Yellow	1	Congruent	2203	NA	125_star_yellow_blue.jpg 126_star_yellow_yellow.jpg	6	N	3.34301
Macaque	Monkey	Yellow	43438	13820	RMF-BoothDT1	Adv Pref FC	Izumi	Stroop_3_2_2.csv	7	290	2	60	3000	White	Scattered	115_mug_blue.jpg	116_mug_yellow.jpg	19	20	116_mug_yellow.jpg	Yellow	1	Control	2525	NA	115_mug_blue.jpg 116_mug_yellow.jpg	6	N	3.40226
Macaque	Monkey	Yellow	43438	13820	RMF-BoothDT1	Adv Pref FC	Izumi	Stroop_3_2_2.csv	8	290	2	60	3000	White	Scattered	111_heart_blue_blue.jpg	112_heart_blue_yellow.jpg	22	16	111_heart_blue_blue.jpg	Blue	0	Incongruent	3524	NA	111_heart_blue_blue.jpg 112_heart_blue_yellow.jpg	6	N	3.54704
Macaque	Monkey	Yellow	43438	13820	RMF-BoothDT1	Adv Pref FC	Izumi	Stroop_3_2_2.csv	9	290	2	60	3000	White	Scattered	121_square_yellow_blue.jpg	122_square_yellow_yellow.jpg	18	13	121_square_yellow_blue.jpg	Blue	0	Congruent	3590	NA	121_square_yellow_blue.jpg 122_square_yellow_yellow.jpg	6	N	3.55509
Macaque	Monkey	Yellow	43438	13820	RMF-BoothDT1	Adv Pref FC	Izumi	Stroop_3_2_2.csv	10	290	2	60	3000	White	Scattered	101_bicycle_blue.JPG	102_bicycle_yellow.JPG	16	23	102_bicycle_yellow.JPG	Yellow	1	Control	1403	NA	101_bicycle_blue.JPG 102_bicycle_yellow.JPG	6	N	3.14706
Macaque	Monkey	Yellow	43438	13820	RMF-BoothDT1	Adv Pref FC	Izumi	Stroop_3_2_2.csv	11	290	2	60	3000	White	Scattered	105_cross_yellow_blue.jpg	106_cross_yellow_yellow.jpg	14	25	106_cross_yellow_yellow.jpg	Yellow	1	Congruent	1110	NA	105_cross_yellow_blue.jpg 106_cross_yellow_yellow.jpg	6	N	3.04532
Macaque	Monkey	Yellow	43438	13820	RMF-BoothDT1	Adv Pref FC	Izumi	Stroop_3_2_2.csv	12	290	2	60	3000	White	Scattered	107_fidget_spinner_blue.jpg	108_fidget_spinner_yellow.jpg	23	15	108_fidget_spinner_yellow.jpg	Yellow	1	Control	4315	NA	107_fidget_spinner_blue.jpg 108_fidget_spinner_yellow.jpg	6	N	3.63498
Macaque	Monkey	Yellow	43438	13820	RMF-BoothDT1	Adv Pref FC	Izumi	Stroop_3_2_2.csv	13	290	2	60	3000	White	Scattered	125_star_yellow_blue.jpg	126_star_yellow_yellow.jpg	23	15	125_star_yellow_blue.jpg	Blue	0	Congruent	2723	NA	125_star_yellow_blue.jpg 126_star_yellow_yellow.jpg	6	N	3.43505
Macaque	Monkey	Yellow	43438	13820	RMF-BoothDT1	Adv Pref FC	Izumi	Stroop_3_2_2.csv	14	290	2	60	3000	White	Scattered	103_cross_blue_blue.JPG	104_cross_blue_yellow.JPG	13	24	104_cross_blue_yellow.JPG	Yellow	1	Incongruent	1868	NA	103_cross_blue_blue.JPG 104_cross_blue_yellow.JPG	6	N	3.27138
Macaque	Monkey	Yellow	43438	13820	RMF-BoothDT1	Adv Pref FC	Izumi	Stroop_3_2_2.csv	15	290	2	60	3000	White	Scattered	109_fork_blue.jpg	110_fork_yellow.jpg	11	20	110_fork_yellow.jpg	Yellow	1	Control	1598	NA	109_fork_blue.jpg 110_fork_yellow.jpg	6	N	3.20358
Macaque	Monkey	Yellow	43438	13820	RMF-BoothDT1	Adv Pref FC	Izumi	Stroop_3_2_2.csv	16	290	2	60	3000	White	Scattered	121_square_yellow_blue.jpg	122_square_yellow_yellow.jpg	17	24	122_square_yellow_yellow.jpg	Yellow	1	Congruent	1306	NA	121_square_yellow_blue.jpg 122_square_yellow_yellow.jpg	6	N	3.11594
Macaque	Monkey	Yellow	43438	13820	RMF-BoothDT1	Adv Pref FC	Izumi	Stroop_3_2_2.csv	17	290	2	60	3000	White	Scattered	119_square_blue_blue.jpg	120_square_blue_yellow.jpg	24	14	119_square_blue_blue.jpg	Blue	0	Incongruent	1545	NA	119_square_blue_blue.jpg 120_square_blue_yellow.jpg	6	N	3.18893
Macaque	Monkey	Yellow	43438	13820	RMF-BoothDT1	Adv Pref FC	Izumi	Stroop_3_2_2.csv	18	290	2	60	3000	White	Scattered	113_heart_yellow_blue.jpg	114_heart_yellow_yellow.jpg	25	16	113_heart_yellow_blue.jpg	Blue	0	Congruent	1704	NA	113_heart_yellow_blue.jpg 114_heart_yellow_yellow.jpg	6	N	3.23147
Macaque	Monkey	Yellow	43438	13820	RMF-BoothDT1	Adv Pref FC	Izumi	Stroop_3_2_2.csv	19	290	2	60	3000	White	Scattered	117_shovel_blue.jpg	118_shovel_yellow.jpg	14	18	118_shovel_yellow.jpg	Yellow	1	Control	907	NA	117_shovel_blue.jpg 118_shovel_yellow.jpg	6	N	2.95761
Macaque	Monkey	Yellow	43438	13820	RMF-BoothDT1	Adv Pref FC	Izumi	Stroop_3_2_2.csv	20	290	2	60	3000	White	Scattered	103_cross_blue_blue.JPG	104_cross_blue_yellow.JPG	21	12	104_cross_blue_yellow.JPG	Yellow	1	Incongruent	1645	NA	103_cross_blue_blue.JPG 104_cross_blue_yellow.JPG	6	N	3.21617
Macaque	Monkey	Yellow	43438	13820	RMF-BoothDT1	Adv Pref FC	Izumi	Stroop_3_2_2.csv	21	290	2	60	3000	White	Scattered	107_fidget_spinner_blue.jpg	108_fidget_spinner_yellow.jpg	16	17	108_fidget_spinner_yellow.jpg	Yellow	1	Control	2927	NA	107_fidget_spinner_blue.jpg 108_fidget_spinner_yellow.jpg	6	N	3.46642
Macaque	Monkey	Yellow	43438	13820	RMF-BoothDT1	Adv Pref FC	Izumi	Stroop_3_2_2.csv	22	290	2	60	3000	White	Scattered	123_star_blue_blue.jpg	124_star_blue_yellow.jpg	23	25	124_star_blue_yellow.jpg	Yellow	1	Incongruent	1770	NA	123_star_blue_blue.jpg 124_star_blue_yellow.jpg	6	N	3.24797
Macaque	Monkey	Yellow	43438	13820	RMF-BoothDT1	Adv Pref FC	Izumi	Stroop_3_2_2.csv	23	290	2	60	3000	White	Scattered	113_heart_yellow_blue.jpg	114_heart_yellow_yellow.jpg	23	17	113_heart_yellow_blue.jpg	Blue	0	Congruent	3220	NA	113_heart_yellow_blue.jpg 114_heart_yellow_yellow.jpg	6	N	3.50786
Macaque	Monkey	Yellow	43438	13820	RMF-BoothDT1	Adv Pref FC	Izumi	Stroop_3_2_2.csv	24	290	2	60	3000	White	Scattered	119_square_blue_blue.jpg	120_square_blue_yellow.jpg	13	17	120_square_blue_yellow.jpg	Yellow	1	Incongruent	925	NA	119_square_blue_blue.jpg 120_square_blue_yellow.jpg	6	N	2.96614
Macaque	Monkey	Yellow	43438	13820	RMF-BoothDT1	Adv Pref FC	Izumi	Stroop_3_2_2.csv	25	290	2	60	3000	White	Scattered	117_shovel_blue.jpg	118_shovel_yellow.jpg	12	25	118_shovel_yellow.jpg	Yellow	1	Control	2438	NA	117_shovel_blue.jpg 118_shovel_yellow.jpg	6	N	3.38703
Macaque	Monkey	Yellow	43438	13820	RMF-BoothDT1	Adv Pref FC	Izumi	Stroop_3_2_2.csv	26	290	2	60	3000	White	Scattered	105_cross_yellow_blue.jpg	106_cross_yellow_yellow.jpg	25	17	105_cross_yellow_blue.jpg	Blue	0	Congruent	1196	NA	105_cross_yellow_blue.jpg 106_cross_yellow_yellow.jpg	6	N	3.07773
Macaque	Monkey	Yellow	43438	13820	RMF-BoothDT1	Adv Pref FC	Izumi	Stroop_3_2_2.csv	27	290	2	60	3000	White	Scattered	123_star_blue_blue.jpg	124_star_blue_yellow.jpg	17	20	124_star_blue_yellow.jpg	Yellow	1	Incongruent	1527	NA	123_star_blue_blue.jpg 124_star_blue_yellow.jpg	6	N	3.18384
Macaque	Monkey	Yellow	43438	13820	RMF-BoothDT1	Adv Pref FC	Izumi	Stroop_3_2_2.csv	28	290	2	60	3000	White	Scattered	111_heart_blue_blue.jpg	112_heart_blue_yellow.jpg	18	25	112_heart_blue_yellow.jpg	Yellow	1	Incongruent	2783	NA	111_heart_blue_blue.jpg 112_heart_blue_yellow.jpg	6	N	3.44451
Macaque	Monkey	Yellow	43438	13820	RMF-BoothDT1	Adv Pref FC	Izumi	Stroop_3_2_2.csv	29	290	2	60	3000	White	Scattered	101_bicycle_blue.JPG	102_bicycle_yellow.JPG	25	11	102_bicycle_yellow.JPG	Yellow	1	Control	7577	NA	101_bicycle_blue.JPG 102_bicycle_yellow.JPG	6	Y	3.8795
Macaque	Monkey	Yellow	43438	13820	RMF-BoothDT1	Adv Pref FC	Izumi	Stroop_3_2_2.csv	30	290	2	60	3000	White	Scattered	103_cross_blue_blue.JPG	104_cross_blue_yellow.JPG	16	17	104_cross_blue_yellow.JPG	Yellow	1	Incongruent	4407	NA	103_cross_blue_blue.JPG 104_cross_blue_yellow.JPG	6	N	3.64414
Macaque	Monkey	Yellow	43445	14185	RMF-BoothDT1	Adv Pref FC	Izumi	Stroop_3_2_3.csv	1	290	2	60	3000	White	Scattered	119_square_blue_blue.jpg	120_square_blue_yellow.jpg	18	19	120_square_blue_yellow.jpg	Yellow	1	Incongruent	1088	NA	119_square_blue_blue.jpg 120_square_blue_yellow.jpg	7	N	3.03663
Macaque	Monkey	Yellow	43445	14185	RMF-BoothDT1	Adv Pref FC	Izumi	Stroop_3_2_3.csv	2	290	2	60	3000	White	Scattered	125_star_yellow_blue.jpg	126_star_yellow_yellow.jpg	15	13	125_star_yellow_blue.jpg	Blue	0	Congruent	1427	NA	125_star_yellow_blue.jpg 126_star_yellow_yellow.jpg	7	N	3.15442
Macaque	Monkey	Yellow	43445	14185	RMF-BoothDT1	Adv Pref FC	Izumi	Stroop_3_2_3.csv	3	290	2	60	3000	White	Scattered	111_heart_blue_blue.jpg	112_heart_blue_yellow.jpg	15	24	112_heart_blue_yellow.jpg	Yellow	1	Incongruent	815	NA	111_heart_blue_blue.jpg 112_heart_blue_yellow.jpg	7	N	2.91116
Macaque	Monkey	Yellow	43445	14185	RMF-BoothDT1	Adv Pref FC	Izumi	Stroop_3_2_3.csv	4	290	2	60	3000	White	Scattered	105_cross_yellow_blue.jpg	106_cross_yellow_yellow.jpg	24	23	106_cross_yellow_yellow.jpg	Yellow	1	Congruent	4314	NA	105_cross_yellow_blue.jpg 106_cross_yellow_yellow.jpg	7	N	3.63488
Macaque	Monkey	Yellow	43445	14185	RMF-BoothDT1	Adv Pref FC	Izumi	Stroop_3_2_3.csv	5	290	2	60	3000	White	Scattered	115_mug_blue.jpg	116_mug_yellow.jpg	16	24	116_mug_yellow.jpg	Yellow	1	Control	2697	NA	115_mug_blue.jpg 116_mug_yellow.jpg	7	N	3.43088
Macaque	Monkey	Yellow	43445	14185	RMF-BoothDT1	Adv Pref FC	Izumi	Stroop_3_2_3.csv	6	290	2	60	3000	White	Scattered	113_heart_yellow_blue.jpg	114_heart_yellow_yellow.jpg	17	13	114_heart_yellow_yellow.jpg	Yellow	1	Congruent	2767	NA	113_heart_yellow_blue.jpg 114_heart_yellow_yellow.jpg	7	N	3.44201
Macaque	Monkey	Yellow	43445	14185	RMF-BoothDT1	Adv Pref FC	Izumi	Stroop_3_2_3.csv	7	290	2	60	3000	White	Scattered	103_cross_blue_blue.JPG	104_cross_blue_yellow.JPG	22	16	104_cross_blue_yellow.JPG	Yellow	1	Incongruent	3227	NA	103_cross_blue_blue.JPG 104_cross_blue_yellow.JPG	7	N	3.5088
Macaque	Monkey	Yellow	43445	14185	RMF-BoothDT1	Adv Pref FC	Izumi	Stroop_3_2_3.csv	8	290	2	60	3000	White	Scattered	101_bicycle_blue.JPG	102_bicycle_yellow.JPG	15	13	102_bicycle_yellow.JPG	Yellow	1	Control	1735	NA	101_bicycle_blue.JPG 102_bicycle_yellow.JPG	7	N	3.2393
Macaque	Monkey	Yellow	43445	14185	RMF-BoothDT1	Adv Pref FC	Izumi	Stroop_3_2_3.csv	9	290	2	60	3000	White	Scattered	103_cross_blue_blue.JPG	104_cross_blue_yellow.JPG	15	13	104_cross_blue_yellow.JPG	Yellow	1	Incongruent	2946	NA	103_cross_blue_blue.JPG 104_cross_blue_yellow.JPG	7	N	3.46923
Macaque	Monkey	Yellow	43445	14185	RMF-BoothDT1	Adv Pref FC	Izumi	Stroop_3_2_3.csv	10	290	2	60	3000	White	Scattered	109_fork_blue.jpg	110_fork_yellow.jpg	14	21	110_fork_yellow.jpg	Yellow	1	Control	2121	NA	109_fork_blue.jpg 110_fork_yellow.jpg	7	N	3.32654
Macaque	Monkey	Yellow	43445	14185	RMF-BoothDT1	Adv Pref FC	Izumi	Stroop_3_2_3.csv	11	290	2	60	3000	White	Scattered	123_star_blue_blue.jpg	124_star_blue_yellow.jpg	14	15	124_star_blue_yellow.jpg	Yellow	1	Incongruent	3545	NA	123_star_blue_blue.jpg 124_star_blue_yellow.jpg	7	N	3.54962
Macaque	Monkey	Yellow	43445	14185	RMF-BoothDT1	Adv Pref FC	Izumi	Stroop_3_2_3.csv	12	290	2	60	3000	White	Scattered	105_cross_yellow_blue.jpg	106_cross_yellow_yellow.jpg	15	11	106_cross_yellow_yellow.jpg	Yellow	1	Congruent	1749	NA	105_cross_yellow_blue.jpg 106_cross_yellow_yellow.jpg	7	N	3.24279
Macaque	Monkey	Yellow	43445	14185	RMF-BoothDT1	Adv Pref FC	Izumi	Stroop_3_2_3.csv	13	290	2	60	3000	White	Scattered	101_bicycle_blue.JPG	102_bicycle_yellow.JPG	17	13	102_bicycle_yellow.JPG	Yellow	1	Control	3110	NA	101_bicycle_blue.JPG 102_bicycle_yellow.JPG	7	N	3.49276
Macaque	Monkey	Yellow	43445	14185	RMF-BoothDT1	Adv Pref FC	Izumi	Stroop_3_2_3.csv	14	290	2	60	3000	White	Scattered	121_square_yellow_blue.jpg	122_square_yellow_yellow.jpg	23	14	121_square_yellow_blue.jpg	Blue	0	Congruent	3999	NA	121_square_yellow_blue.jpg 122_square_yellow_yellow.jpg	7	N	3.60195
Macaque	Monkey	Yellow	43445	14185	RMF-BoothDT1	Adv Pref FC	Izumi	Stroop_3_2_3.csv	15	290	2	60	3000	White	Scattered	119_square_blue_blue.jpg	120_square_blue_yellow.jpg	17	23	120_square_blue_yellow.jpg	Yellow	1	Incongruent	957	NA	119_square_blue_blue.jpg 120_square_blue_yellow.jpg	7	N	2.98091
Macaque	Monkey	Yellow	43445	14185	RMF-BoothDT1	Adv Pref FC	Izumi	Stroop_3_2_3.csv	16	290	2	60	3000	White	Scattered	121_square_yellow_blue.jpg	122_square_yellow_yellow.jpg	18	25	122_square_yellow_yellow.jpg	Yellow	1	Congruent	1985	NA	121_square_yellow_blue.jpg 122_square_yellow_yellow.jpg	7	N	3.29776
Macaque	Monkey	Yellow	43445	14185	RMF-BoothDT1	Adv Pref FC	Izumi	Stroop_3_2_3.csv	17	290	2	60	3000	White	Scattered	109_fork_blue.jpg	110_fork_yellow.jpg	18	15	110_fork_yellow.jpg	Yellow	1	Control	4607	NA	109_fork_blue.jpg 110_fork_yellow.jpg	7	N	3.66342
Macaque	Monkey	Yellow	43445	14185	RMF-BoothDT1	Adv Pref FC	Izumi	Stroop_3_2_3.csv	18	290	2	60	3000	White	Scattered	111_heart_blue_blue.jpg	112_heart_blue_yellow.jpg	22	15	111_heart_blue_blue.jpg	Blue	0	Incongruent	2796	NA	111_heart_blue_blue.jpg 112_heart_blue_yellow.jpg	7	N	3.44654
Macaque	Monkey	Yellow	43445	14185	RMF-BoothDT1	Adv Pref FC	Izumi	Stroop_3_2_3.csv	19	290	2	60	3000	White	Scattered	107_fidget_spinner_blue.jpg	108_fidget_spinner_yellow.jpg	20	22	107_fidget_spinner_blue.jpg	Blue	0	Control	3711	NA	107_fidget_spinner_blue.jpg 108_fidget_spinner_yellow.jpg	7	N	3.56949
Macaque	Monkey	Yellow	43445	14185	RMF-BoothDT1	Adv Pref FC	Izumi	Stroop_3_2_3.csv	20	290	2	60	3000	White	Scattered	119_square_blue_blue.jpg	120_square_blue_yellow.jpg	19	11	119_square_blue_blue.jpg	Blue	0	Incongruent	1211	NA	119_square_blue_blue.jpg 120_square_blue_yellow.jpg	7	N	3.08314
Macaque	Monkey	Yellow	43445	14185	RMF-BoothDT1	Adv Pref FC	Izumi	Stroop_3_2_3.csv	21	290	2	60	3000	White	Scattered	121_square_yellow_blue.jpg	122_square_yellow_yellow.jpg	21	12	121_square_yellow_blue.jpg	Blue	0	Congruent	1151	NA	121_square_yellow_blue.jpg 122_square_yellow_yellow.jpg	7	N	3.06108
Macaque	Monkey	Yellow	43445	14185	RMF-BoothDT1	Adv Pref FC	Izumi	Stroop_3_2_3.csv	22	290	2	60	3000	White	Scattered	117_shovel_blue.jpg	118_shovel_yellow.jpg	14	16	118_shovel_yellow.jpg	Yellow	1	Control	875	NA	117_shovel_blue.jpg 118_shovel_yellow.jpg	7	N	2.94201
Macaque	Monkey	Yellow	43445	14185	RMF-BoothDT1	Adv Pref FC	Izumi	Stroop_3_2_3.csv	23	290	2	60	3000	White	Scattered	113_heart_yellow_blue.jpg	114_heart_yellow_yellow.jpg	18	22	114_heart_yellow_yellow.jpg	Yellow	1	Congruent	2983	NA	113_heart_yellow_blue.jpg 114_heart_yellow_yellow.jpg	7	N	3.47465
Macaque	Monkey	Yellow	43445	14185	RMF-BoothDT1	Adv Pref FC	Izumi	Stroop_3_2_3.csv	24	290	2	60	3000	White	Scattered	115_mug_blue.jpg	116_mug_yellow.jpg	15	18	116_mug_yellow.jpg	Yellow	1	Control	1438	NA	115_mug_blue.jpg 116_mug_yellow.jpg	7	N	3.15776
Macaque	Monkey	Yellow	43445	14185	RMF-BoothDT1	Adv Pref FC	Izumi	Stroop_3_2_3.csv	25	290	2	60	3000	White	Scattered	111_heart_blue_blue.jpg	112_heart_blue_yellow.jpg	20	11	112_heart_blue_yellow.jpg	Yellow	1	Incongruent	3344	NA	111_heart_blue_blue.jpg 112_heart_blue_yellow.jpg	7	N	3.52427
Macaque	Monkey	Yellow	43445	14185	RMF-BoothDT1	Adv Pref FC	Izumi	Stroop_3_2_3.csv	26	290	2	60	3000	White	Scattered	125_star_yellow_blue.jpg	126_star_yellow_yellow.jpg	12	14	125_star_yellow_blue.jpg	Blue	0	Congruent	2457	NA	125_star_yellow_blue.jpg 126_star_yellow_yellow.jpg	7	N	3.39041
Macaque	Monkey	Yellow	43445	14185	RMF-BoothDT1	Adv Pref FC	Izumi	Stroop_3_2_3.csv	27	290	2	60	3000	White	Scattered	117_shovel_blue.jpg	118_shovel_yellow.jpg	24	14	118_shovel_yellow.jpg	Yellow	1	Control	2454	NA	117_shovel_blue.jpg 118_shovel_yellow.jpg	7	N	3.38987
Macaque	Monkey	Yellow	43445	14185	RMF-BoothDT1	Adv Pref FC	Izumi	Stroop_3_2_3.csv	28	290	2	60	3000	White	Scattered	113_heart_yellow_blue.jpg	114_heart_yellow_yellow.jpg	14	19	114_heart_yellow_yellow.jpg	Yellow	1	Congruent	4048	NA	113_heart_yellow_blue.jpg 114_heart_yellow_yellow.jpg	7	N	3.60724
Macaque	Monkey	Yellow	43445	14185	RMF-BoothDT1	Adv Pref FC	Izumi	Stroop_3_2_3.csv	29	290	2	60	3000	White	Scattered	107_fidget_spinner_blue.jpg	108_fidget_spinner_yellow.jpg	25	19	108_fidget_spinner_yellow.jpg	Yellow	1	Control	2777	NA	107_fidget_spinner_blue.jpg 108_fidget_spinner_yellow.jpg	7	N	3.44358
Macaque	Monkey	Yellow	43445	14185	RMF-BoothDT1	Adv Pref FC	Izumi	Stroop_3_2_3.csv	30	290	2	60	3000	White	Scattered	123_star_blue_blue.jpg	124_star_blue_yellow.jpg	19	24	124_star_blue_yellow.jpg	Yellow	1	Incongruent	1485	NA	123_star_blue_blue.jpg 124_star_blue_yellow.jpg	7	N	3.17173
Macaque	Monkey	Yellow	43454	44158	RMF-BoothDT1	Adv Pref FC	Izumi	Stroop_3_2_4.csv	1	290	2	60	3000	White	Scattered	123_star_blue_blue.jpg	124_star_blue_yellow.jpg	19	25	124_star_blue_yellow.jpg	Yellow	1	Incongruent	1096	NA	123_star_blue_blue.jpg 124_star_blue_yellow.jpg	8	N	3.03981
Macaque	Monkey	Yellow	43454	44158	RMF-BoothDT1	Adv Pref FC	Izumi	Stroop_3_2_4.csv	2	290	2	60	3000	White	Scattered	115_mug_blue.jpg	116_mug_yellow.jpg	11	23	116_mug_yellow.jpg	Yellow	1	Control	5769	NA	115_mug_blue.jpg 116_mug_yellow.jpg	8	N	3.7611
Macaque	Monkey	Yellow	43454	44158	RMF-BoothDT1	Adv Pref FC	Izumi	Stroop_3_2_4.csv	3	290	2	60	3000	White	Scattered	105_cross_yellow_blue.jpg	106_cross_yellow_yellow.jpg	22	21	106_cross_yellow_yellow.jpg	Yellow	1	Congruent	3295	NA	105_cross_yellow_blue.jpg 106_cross_yellow_yellow.jpg	8	N	3.51786
Macaque	Monkey	Yellow	43454	44158	RMF-BoothDT1	Adv Pref FC	Izumi	Stroop_3_2_4.csv	4	290	2	60	3000	White	Scattered	109_fork_blue.jpg	110_fork_yellow.jpg	18	20	110_fork_yellow.jpg	Yellow	1	Control	2895	NA	109_fork_blue.jpg 110_fork_yellow.jpg	8	N	3.46165
Macaque	Monkey	Yellow	43482	19299	MAC-Touch1	Adv Pref FC	Izumi	Stroop_3_2_Izumi3sec.csv	1	290	2	60	3000	White	Scattered	123_star_blue_blue.jpg	124_star_blue_yellow.jpg	21	16	124_star_blue_yellow.jpg	Yellow	1	Incongruent	1243	NA	123_star_blue_blue.jpg 124_star_blue_yellow.jpg	9	N	3.09447
Macaque	Monkey	Yellow	43482	19299	MAC-Touch1	Adv Pref FC	Izumi	Stroop_3_2_Izumi3sec.csv	2	290	2	60	3000	White	Scattered	113_heart_yellow_blue.jpg	114_heart_yellow_yellow.jpg	25	19	114_heart_yellow_yellow.jpg	Yellow	1	Congruent	1556	NA	113_heart_yellow_blue.jpg 114_heart_yellow_yellow.jpg	9	N	3.19201
Macaque	Monkey	Yellow	43482	19299	MAC-Touch1	Adv Pref FC	Izumi	Stroop_3_2_Izumi3sec.csv	3	290	2	60	3000	White	Scattered	117_shovel_blue.jpg	118_shovel_yellow.jpg	25	13	118_shovel_yellow.jpg	Yellow	1	Control	3000	NA	117_shovel_blue.jpg 118_shovel_yellow.jpg	9	N	3.47712
Macaque	Monkey	Yellow	43482	19299	MAC-Touch1	Adv Pref FC	Izumi	Stroop_3_2_Izumi3sec.csv	4	290	2	60	3000	White	Scattered	125_star_yellow_blue.jpg	126_star_yellow_yellow.jpg	23	24	126_star_yellow_yellow.jpg	Yellow	1	Congruent	1427	NA	125_star_yellow_blue.jpg 126_star_yellow_yellow.jpg	9	N	3.15442
Macaque	Monkey	Yellow	43482	19299	MAC-Touch1	Adv Pref FC	Izumi	Stroop_3_2_Izumi3sec.csv	5	290	2	60	3000	White	Scattered	109_fork_blue.jpg	110_fork_yellow.jpg	13	24	110_fork_yellow.jpg	Yellow	1	Control	1781	NA	109_fork_blue.jpg 110_fork_yellow.jpg	9	N	3.25066
Macaque	Monkey	Yellow	43482	19299	MAC-Touch1	Adv Pref FC	Izumi	Stroop_3_2_Izumi3sec.csv	6	290	2	60	3000	White	Scattered	113_heart_yellow_blue.jpg	114_heart_yellow_yellow.jpg	16	12	114_heart_yellow_yellow.jpg	Yellow	1	Congruent	2150	NA	113_heart_yellow_blue.jpg 114_heart_yellow_yellow.jpg	9	N	3.33244
Macaque	Monkey	Yellow	43482	19299	MAC-Touch1	Adv Pref FC	Izumi	Stroop_3_2_Izumi3sec.csv	7	290	2	60	3000	White	Scattered	111_heart_blue_blue.jpg	112_heart_blue_yellow.jpg	17	21	112_heart_blue_yellow.jpg	Yellow	1	Incongruent	4113	NA	111_heart_blue_blue.jpg 112_heart_blue_yellow.jpg	9	N	3.61416
Macaque	Monkey	Yellow	43482	19299	MAC-Touch1	Adv Pref FC	Izumi	Stroop_3_2_Izumi3sec.csv	8	290	2	60	3000	White	Scattered	119_square_blue_blue.jpg	120_square_blue_yellow.jpg	12	22	120_square_blue_yellow.jpg	Yellow	1	Incongruent	3398	NA	119_square_blue_blue.jpg 120_square_blue_yellow.jpg	9	N	3.53122
Macaque	Monkey	Yellow	43482	19299	MAC-Touch1	Adv Pref FC	Izumi	Stroop_3_2_Izumi3sec.csv	9	290	2	60	3000	White	Scattered	105_cross_yellow_blue.jpg	106_cross_yellow_yellow.jpg	20	22	106_cross_yellow_yellow.jpg	Yellow	1	Congruent	971	NA	105_cross_yellow_blue.jpg 106_cross_yellow_yellow.jpg	9	N	2.98722
Macaque	Monkey	Yellow	43482	19299	MAC-Touch1	Adv Pref FC	Izumi	Stroop_3_2_Izumi3sec.csv	10	290	2	60	3000	White	Scattered	101_bicycle_blue.JPG	102_bicycle_yellow.JPG	20	18	102_bicycle_yellow.JPG	Yellow	1	Control	2375	NA	101_bicycle_blue.JPG 102_bicycle_yellow.JPG	9	N	3.37566
Macaque	Monkey	Yellow	43508	44161	RMF-BoothDT1	Adv Pref FC	Izumi	Stroop_3_2_Izumi3sec2.csv	1	290	2	60	3000	White	Scattered	119_square_blue_blue.jpg	120_square_blue_yellow.jpg	15	21	120_square_blue_yellow.jpg	Yellow	1	Incongruent	1483	NA	119_square_blue_blue.jpg 120_square_blue_yellow.jpg	9	N	3.17114
Macaque	Monkey	Yellow	43508	44161	RMF-BoothDT1	Adv Pref FC	Izumi	Stroop_3_2_Izumi3sec2.csv	2	290	2	60	3000	White	Scattered	105_cross_yellow_blue.jpg	106_cross_yellow_yellow.jpg	21	17	106_cross_yellow_yellow.jpg	Yellow	1	Congruent	5946	NA	105_cross_yellow_blue.jpg 106_cross_yellow_yellow.jpg	9	Y	3.77422
Macaque	Monkey	Yellow	43508	44161	RMF-BoothDT1	Adv Pref FC	Izumi	Stroop_3_2_Izumi3sec2.csv	3	290	2	60	3000	White	Scattered	103_cross_blue_blue.JPG	104_cross_blue_yellow.JPG	20	19	104_cross_blue_yellow.JPG	Yellow	1	Incongruent	2238	NA	103_cross_blue_blue.JPG 104_cross_blue_yellow.JPG	9	N	3.34986
Macaque	Monkey	Yellow	43508	44161	RMF-BoothDT1	Adv Pref FC	Izumi	Stroop_3_2_Izumi3sec2.csv	4	290	2	60	3000	White	Scattered	115_mug_blue.jpg	116_mug_yellow.jpg	17	13	115_mug_blue.jpg	Blue	0	Control	1666	NA	115_mug_blue.jpg 116_mug_yellow.jpg	9	N	3.22167
Macaque	Monkey	Yellow	43508	44161	RMF-BoothDT1	Adv Pref FC	Izumi	Stroop_3_2_Izumi3sec2.csv	5	290	2	60	3000	White	Scattered	125_star_yellow_blue.jpg	126_star_yellow_yellow.jpg	14	11	125_star_yellow_blue.jpg	Blue	0	Congruent	3677	NA	125_star_yellow_blue.jpg 126_star_yellow_yellow.jpg	9	N	3.56549
Macaque	Monkey	Yellow	43508	44161	RMF-BoothDT1	Adv Pref FC	Izumi	Stroop_3_2_Izumi3sec2.csv	6	290	2	60	3000	White	Scattered	107_fidget_spinner_blue.jpg	108_fidget_spinner_yellow.jpg	18	15	108_fidget_spinner_yellow.jpg	Yellow	1	Control	1443	NA	107_fidget_spinner_blue.jpg 108_fidget_spinner_yellow.jpg	9	N	3.15927
Macaque	Monkey	Yellow	43508	44161	RMF-BoothDT1	Adv Pref FC	Izumi	Stroop_3_2_Izumi3sec2.csv	7	290	2	60	3000	White	Scattered	123_star_blue_blue.jpg	124_star_blue_yellow.jpg	24	18	124_star_blue_yellow.jpg	Yellow	1	Incongruent	984	NA	123_star_blue_blue.jpg 124_star_blue_yellow.jpg	9	N	2.993
Macaque	Monkey	Yellow	43508	44161	RMF-BoothDT1	Adv Pref FC	Izumi	Stroop_3_2_Izumi3sec2.csv	8	290	2	60	3000	White	Scattered	101_bicycle_blue.JPG	102_bicycle_yellow.JPG	23	20	101_bicycle_blue.JPG	Blue	0	Control	1335	NA	101_bicycle_blue.JPG 102_bicycle_yellow.JPG	9	N	3.12548
Macaque	Monkey	Yellow	43508	44161	RMF-BoothDT1	Adv Pref FC	Izumi	Stroop_3_2_Izumi3sec2.csv	9	290	2	60	3000	White	Scattered	121_square_yellow_blue.jpg	122_square_yellow_yellow.jpg	17	22	121_square_yellow_blue.jpg	Blue	0	Congruent	2453	NA	121_square_yellow_blue.jpg 122_square_yellow_yellow.jpg	9	N	3.3897
Macaque	Monkey	Yellow	43521	44165	RMF-BoothDT1	Adv Pref FC	Izumi	Stroop_3_2_Izumi3sec3.csv	1	290	2	60	3000	White	Scattered	111_heart_blue_blue.jpg	112_heart_blue_yellow.jpg	15	22	112_heart_blue_yellow.jpg	Yellow	1	Incongruent	1226	NA	111_heart_blue_blue.jpg 112_heart_blue_yellow.jpg	9	N	3.08849
Macaque	Monkey	Yellow	43521	44165	RMF-BoothDT1	Adv Pref FC	Izumi	Stroop_3_2_Izumi3sec3.csv	2	290	2	60	3000	White	Scattered	107_fidget_spinner_blue.jpg	108_fidget_spinner_yellow.jpg	21	14	108_fidget_spinner_yellow.jpg	Yellow	1	Control	7548	NA	107_fidget_spinner_blue.jpg 108_fidget_spinner_yellow.jpg	9	Y	3.87783
Macaque	Monkey	Yellow	43550	44178	MAC-Touch1	Adv Pref FC	Izumi	Stroop_3_2_Izumi3sec4.csv	1	290	2	60	3000	White	Scattered	103_cross_blue_blue.JPG	104_cross_blue_yellow.JPG	20	12	104_cross_blue_yellow.JPG	Yellow	1	Incongruent	1887	NA	103_cross_blue_blue.JPG 104_cross_blue_yellow.JPG	9	N	3.27577
Macaque	Monkey	Yellow	43550	44178	MAC-Touch1	Adv Pref FC	Izumi	Stroop_3_2_Izumi3sec4.csv	2	290	2	60	3000	White	Scattered	125_star_yellow_blue.jpg	126_star_yellow_yellow.jpg	14	19	126_star_yellow_yellow.jpg	Yellow	1	Congruent	2079	NA	125_star_yellow_blue.jpg 126_star_yellow_yellow.jpg	9	N	3.31785
Macaque	Monkey	Yellow	43550	44178	MAC-Touch1	Adv Pref FC	Izumi	Stroop_3_2_Izumi3sec4.csv	3	290	2	60	3000	White	Scattered	117_shovel_blue.jpg	118_shovel_yellow.jpg	25	17	118_shovel_yellow.jpg	Yellow	1	Control	4881	NA	117_shovel_blue.jpg 118_shovel_yellow.jpg	9	N	3.68851
Macaque	Monkey	Yellow	43550	44178	MAC-Touch1	Adv Pref FC	Izumi	Stroop_3_2_Izumi3sec4.csv	4	290	2	60	3000	White	Scattered	121_square_yellow_blue.jpg	122_square_yellow_yellow.jpg	14	24	121_square_yellow_blue.jpg	Blue	0	Congruent	3359	NA	121_square_yellow_blue.jpg 122_square_yellow_yellow.jpg	9	N	3.52621
Macaque	Monkey	Blue	43578	11-58-55	MAC-Touch1	Adv Pref FC	Mito	Stroop_3_2_1.csv	1	290	2	None	3000	White	Scattered	113_heart_yellow_blue.jpg	114_heart_yellow_yellow.jpg	23	21	113_heart_yellow_blue.jpg	Blue	1	Incongruent	1612	NA	113_heart_yellow_blue.jpg 114_heart_yellow_yellow.jpg	1	N	3.20737
Macaque	Monkey	Blue	43578	11-59-00	MAC-Touch1	Adv Pref FC	Mito	Stroop_3_2_1.csv	2	290	2	None	3000	White	Scattered	103_cross_blue_blue.JPG	104_cross_blue_yellow.JPG	21	17	104_cross_blue_yellow.JPG	Yellow	0	Congruent	5026	NA	103_cross_blue_blue.JPG 104_cross_blue_yellow.JPG	1	N	3.70122
Macaque	Monkey	Blue	43578	11-59-08	MAC-Touch1	Adv Pref FC	Mito	Stroop_3_2_1.csv	3	290	2	None	3000	White	Scattered	121_square_yellow_blue.jpg	122_square_yellow_yellow.jpg	20	22	121_square_yellow_blue.jpg	Blue	1	Incongruent	4604	NA	121_square_yellow_blue.jpg 122_square_yellow_yellow.jpg	1	N	3.66314
Macaque	Monkey	Blue	43578	11-59-15	MAC-Touch1	Adv Pref FC	Mito	Stroop_3_2_1.csv	4	290	2	None	3000	White	Scattered	117_shovel_blue.jpg	118_shovel_yellow.jpg	18	16	117_shovel_blue.jpg	Blue	1	Control	3872	NA	117_shovel_blue.jpg 118_shovel_yellow.jpg	1	N	3.58794
Macaque	Monkey	Blue	43578	11-59-22	MAC-Touch1	Adv Pref FC	Mito	Stroop_3_2_1.csv	5	290	2	None	3000	White	Scattered	123_star_blue_blue.jpg	124_star_blue_yellow.jpg	17	22	123_star_blue_blue.jpg	Blue	1	Congruent	4442	NA	123_star_blue_blue.jpg 124_star_blue_yellow.jpg	1	N	3.64758
Macaque	Monkey	Blue	43578	11-59-30	MAC-Touch1	Adv Pref FC	Mito	Stroop_3_2_1.csv	6	290	2	None	3000	White	Scattered	109_fork_blue.jpg	110_fork_yellow.jpg	11	25	109_fork_blue.jpg	Blue	1	Control	3996	NA	109_fork_blue.jpg 110_fork_yellow.jpg	1	N	3.60163
Macaque	Monkey	Blue	43578	11-59-37	MAC-Touch1	Adv Pref FC	Mito	Stroop_3_2_1.csv	7	290	2	None	3000	White	Scattered	121_square_yellow_blue.jpg	122_square_yellow_yellow.jpg	11	17	121_square_yellow_blue.jpg	Blue	1	Incongruent	4543	NA	121_square_yellow_blue.jpg 122_square_yellow_yellow.jpg	1	N	3.65734
Macaque	Monkey	Blue	43578	11-59-45	MAC-Touch1	Adv Pref FC	Mito	Stroop_3_2_1.csv	8	290	2	None	3000	White	Scattered	111_heart_blue_blue.jpg	112_heart_blue_yellow.jpg	12	20	111_heart_blue_blue.jpg	Blue	1	Congruent	4321	NA	111_heart_blue_blue.jpg 112_heart_blue_yellow.jpg	1	N	3.63558
Macaque	Monkey	Blue	43578	11-59-52	MAC-Touch1	Adv Pref FC	Mito	Stroop_3_2_1.csv	9	290	2	None	3000	White	Scattered	125_star_yellow_blue.jpg	126_star_yellow_yellow.jpg	24	17	125_star_yellow_blue.jpg	Blue	1	Incongruent	4994	NA	125_star_yellow_blue.jpg 126_star_yellow_yellow.jpg	1	N	3.69845
Macaque	Monkey	Blue	43578	12-00-00	MAC-Touch1	Adv Pref FC	Mito	Stroop_3_2_1.csv	10	290	2	None	3000	White	Scattered	107_fidget_spinner_blue.jpg	108_fidget_spinner_yellow.jpg	18	24	107_fidget_spinner_blue.jpg	Blue	1	Control	2378	NA	107_fidget_spinner_blue.jpg 108_fidget_spinner_yellow.jpg	1	N	3.37621
Macaque	Monkey	Blue	43578	12-00-06	MAC-Touch1	Adv Pref FC	Mito	Stroop_3_2_1.csv	11	290	2	None	3000	White	Scattered	121_square_yellow_blue.jpg	122_square_yellow_yellow.jpg	15	21	121_square_yellow_blue.jpg	Blue	1	Incongruent	2754	NA	121_square_yellow_blue.jpg 122_square_yellow_yellow.jpg	1	N	3.43996
Macaque	Monkey	Blue	43578	12-00-12	MAC-Touch1	Adv Pref FC	Mito	Stroop_3_2_1.csv	12	290	2	None	3000	White	Scattered	111_heart_blue_blue.jpg	112_heart_blue_yellow.jpg	15	24	112_heart_blue_yellow.jpg	Yellow	0	Congruent	4548	NA	111_heart_blue_blue.jpg 112_heart_blue_yellow.jpg	1	N	3.65782
Macaque	Monkey	Blue	43578	12-00-19	MAC-Touch1	Adv Pref FC	Mito	Stroop_3_2_1.csv	13	290	2	None	3000	White	Scattered	119_square_blue_blue.jpg	120_square_blue_yellow.jpg	15	21	119_square_blue_blue.jpg	Blue	1	Congruent	7088	NA	119_square_blue_blue.jpg 120_square_blue_yellow.jpg	1	N	3.85052
Macaque	Monkey	Blue	43578	12-00-30	MAC-Touch1	Adv Pref FC	Mito	Stroop_3_2_1.csv	14	290	2	None	3000	White	Scattered	113_heart_yellow_blue.jpg	114_heart_yellow_yellow.jpg	13	24	114_heart_yellow_yellow.jpg	Yellow	0	Incongruent	2988	NA	113_heart_yellow_blue.jpg 114_heart_yellow_yellow.jpg	1	N	3.47538
Macaque	Monkey	Blue	43578	12-00-36	MAC-Touch1	Adv Pref FC	Mito	Stroop_3_2_1.csv	15	290	2	None	3000	White	Scattered	109_fork_blue.jpg	110_fork_yellow.jpg	21	11	110_fork_yellow.jpg	Yellow	0	Control	8661	NA	109_fork_blue.jpg 110_fork_yellow.jpg	1	Y	3.93757
Macaque	Monkey	Blue	43578	12-00-47	MAC-Touch1	Adv Pref FC	Mito	Stroop_3_2_1.csv	16	290	2	None	3000	White	Scattered	111_heart_blue_blue.jpg	112_heart_blue_yellow.jpg	16	24	112_heart_blue_yellow.jpg	Yellow	0	Congruent	1547	NA	111_heart_blue_blue.jpg 112_heart_blue_yellow.jpg	1	N	3.18949
Macaque	Monkey	Blue	43578	12-00-52	MAC-Touch1	Adv Pref FC	Mito	Stroop_3_2_1.csv	17	290	2	None	3000	White	Scattered	103_cross_blue_blue.JPG	104_cross_blue_yellow.JPG	12	11	103_cross_blue_blue.JPG	Blue	1	Congruent	3402	NA	103_cross_blue_blue.JPG 104_cross_blue_yellow.JPG	1	N	3.53173
Macaque	Monkey	Blue	43578	12-00-59	MAC-Touch1	Adv Pref FC	Mito	Stroop_3_2_1.csv	18	290	2	None	3000	White	Scattered	101_bicycle_blue.JPG	102_bicycle_yellow.JPG	23	21	101_bicycle_blue.JPG	Blue	1	Control	4923	NA	101_bicycle_blue.JPG 102_bicycle_yellow.JPG	1	N	3.69223
Macaque	Monkey	Blue	43578	39417	MAC-Touch1	Adv Pref FC	Mito	Stroop_3_2_1.csv	19	290	2	None	3000	White	Scattered	105_cross_yellow_blue.jpg	106_cross_yellow_yellow.jpg	14	19	105_cross_yellow_blue.jpg	Blue	1	Incongruent	5137	NA	105_cross_yellow_blue.jpg 106_cross_yellow_yellow.jpg	1	N	3.71071
Macaque	Monkey	Blue	43578	42339	MAC-Touch1	Adv Pref FC	Mito	Stroop_3_2_1.csv	20	290	2	None	3000	White	Scattered	117_shovel_blue.jpg	118_shovel_yellow.jpg	18	21	117_shovel_blue.jpg	Blue	1	Control	4515	NA	117_shovel_blue.jpg 118_shovel_yellow.jpg	1	N	3.65466
Macaque	Monkey	Blue	43578	44896	MAC-Touch1	Adv Pref FC	Mito	Stroop_3_2_1.csv	21	290	2	None	3000	White	Scattered	125_star_yellow_blue.jpg	126_star_yellow_yellow.jpg	14	22	125_star_yellow_blue.jpg	Blue	1	Incongruent	6419	NA	125_star_yellow_blue.jpg 126_star_yellow_yellow.jpg	1	N	3.80747
Macaque	Monkey	Blue	43578	12024	MAC-Touch1	Adv Pref FC	Mito	Stroop_3_2_1.csv	22	290	2	None	3000	White	Scattered	101_bicycle_blue.JPG	102_bicycle_yellow.JPG	15	12	101_bicycle_blue.JPG	Blue	1	Control	6702	NA	101_bicycle_blue.JPG 102_bicycle_yellow.JPG	1	N	3.8262
Macaque	Monkey	Blue	43578	15676	MAC-Touch1	Adv Pref FC	Mito	Stroop_3_2_1.csv	23	290	2	None	3000	White	Scattered	113_heart_yellow_blue.jpg	114_heart_yellow_yellow.jpg	23	24	113_heart_yellow_blue.jpg	Blue	1	Incongruent	1226	NA	113_heart_yellow_blue.jpg 114_heart_yellow_yellow.jpg	1	N	3.08849
Macaque	Monkey	Blue	43578	17137	MAC-Touch1	Adv Pref FC	Mito	Stroop_3_2_1.csv	24	290	2	None	3000	White	Scattered	119_square_blue_blue.jpg	120_square_blue_yellow.jpg	16	24	120_square_blue_yellow.jpg	Yellow	0	Congruent	3616	NA	119_square_blue_blue.jpg 120_square_blue_yellow.jpg	1	N	3.55823
Macaque	Monkey	Blue	43578	19694	MAC-Touch1	Adv Pref FC	Mito	Stroop_3_2_1.csv	25	290	2	None	3000	White	Scattered	115_mug_blue.jpg	116_mug_yellow.jpg	22	14	116_mug_yellow.jpg	Yellow	0	Control	3012	NA	115_mug_blue.jpg 116_mug_yellow.jpg	1	N	3.47885
Macaque	Monkey	Blue	43578	21885	MAC-Touch1	Adv Pref FC	Mito	Stroop_3_2_1.csv	26	290	2	None	3000	White	Scattered	123_star_blue_blue.jpg	124_star_blue_yellow.jpg	22	13	124_star_blue_yellow.jpg	Yellow	0	Congruent	5889	NA	123_star_blue_blue.jpg 124_star_blue_yellow.jpg	1	N	3.77004
Macaque	Monkey	Blue	43578	39784	MAC-Touch1	Adv Pref FC	Mito	Stroop_3_2_1.csv	27	290	2	None	3000	White	Scattered	105_cross_yellow_blue.jpg	106_cross_yellow_yellow.jpg	11	18	106_cross_yellow_yellow.jpg	Yellow	0	Incongruent	2078	NA	105_cross_yellow_blue.jpg 106_cross_yellow_yellow.jpg	1	N	3.31765
Macaque	Monkey	Blue	43578	41610	MAC-Touch1	Adv Pref FC	Mito	Stroop_3_2_1.csv	28	290	2	None	3000	White	Scattered	107_fidget_spinner_blue.jpg	108_fidget_spinner_yellow.jpg	23	16	107_fidget_spinner_blue.jpg	Blue	1	Control	2078	NA	107_fidget_spinner_blue.jpg 108_fidget_spinner_yellow.jpg	1	N	3.31765
Macaque	Monkey	Blue	43578	43436	MAC-Touch1	Adv Pref FC	Mito	Stroop_3_2_1.csv	29	290	2	None	3000	White	Scattered	119_square_blue_blue.jpg	120_square_blue_yellow.jpg	16	21	119_square_blue_blue.jpg	Blue	1	Congruent	4607	NA	119_square_blue_blue.jpg 120_square_blue_yellow.jpg	1	N	3.66342
Macaque	Monkey	Blue	43578	46358	MAC-Touch1	Adv Pref FC	Mito	Stroop_3_2_1.csv	30	290	2	None	3000	White	Scattered	115_mug_blue.jpg	116_mug_yellow.jpg	12	13	115_mug_blue.jpg	Blue	1	Control	5489	NA	115_mug_blue.jpg 116_mug_yellow.jpg	1	N	3.73949
Macaque	Monkey	Blue	43581	39419	MAC-Touch1	Adv Pref FC	Mito	Stroop_3_2_2.csv	1	290	2	None	3000	White	Scattered	115_mug_blue.jpg	116_mug_yellow.jpg	20	14	115_mug_blue.jpg	Blue	1	Control	1571	NA	115_mug_blue.jpg 116_mug_yellow.jpg	2	N	3.19618
Macaque	Monkey	Blue	43581	41246	MAC-Touch1	Adv Pref FC	Mito	Stroop_3_2_2.csv	2	290	2	None	3000	White	Scattered	125_star_yellow_blue.jpg	126_star_yellow_yellow.jpg	20	19	126_star_yellow_yellow.jpg	Yellow	0	Incongruent	9129	NA	125_star_yellow_blue.jpg 126_star_yellow_yellow.jpg	2	Y	3.96042
Macaque	Monkey	Blue	43581	45629	MAC-Touch1	Adv Pref FC	Mito	Stroop_3_2_2.csv	3	290	2	None	3000	White	Scattered	109_fork_blue.jpg	110_fork_yellow.jpg	19	15	109_fork_blue.jpg	Blue	1	Control	2286	NA	109_fork_blue.jpg 110_fork_yellow.jpg	2	N	3.35908
Macaque	Monkey	Blue	43581	11295	MAC-Touch1	Adv Pref FC	Mito	Stroop_3_2_2.csv	4	290	2	None	3000	White	Scattered	123_star_blue_blue.jpg	124_star_blue_yellow.jpg	13	16	123_star_blue_blue.jpg	Blue	1	Congruent	3924	NA	123_star_blue_blue.jpg 124_star_blue_yellow.jpg	2	N	3.59373
Macaque	Monkey	Blue	43581	13852	MAC-Touch1	Adv Pref FC	Mito	Stroop_3_2_2.csv	5	290	2	None	3000	White	Scattered	105_cross_yellow_blue.jpg	106_cross_yellow_yellow.jpg	16	25	105_cross_yellow_blue.jpg	Blue	1	Incongruent	2320	NA	105_cross_yellow_blue.jpg 106_cross_yellow_yellow.jpg	2	N	3.36549
Macaque	Monkey	Blue	43581	15678	MAC-Touch1	Adv Pref FC	Mito	Stroop_3_2_2.csv	6	290	2	None	3000	White	Scattered	125_star_yellow_blue.jpg	126_star_yellow_yellow.jpg	23	24	126_star_yellow_yellow.jpg	Yellow	0	Incongruent	1113	NA	125_star_yellow_blue.jpg 126_star_yellow_yellow.jpg	2	N	3.0465
Macaque	Monkey	Blue	43581	17139	MAC-Touch1	Adv Pref FC	Mito	Stroop_3_2_2.csv	7	290	2	None	3000	White	Scattered	115_mug_blue.jpg	116_mug_yellow.jpg	20	24	115_mug_blue.jpg	Blue	1	Control	1351	NA	115_mug_blue.jpg 116_mug_yellow.jpg	2	N	3.13066
Macaque	Monkey	Blue	43581	18965	MAC-Touch1	Adv Pref FC	Mito	Stroop_3_2_2.csv	8	290	2	None	3000	White	Scattered	111_heart_blue_blue.jpg	112_heart_blue_yellow.jpg	23	18	112_heart_blue_yellow.jpg	Yellow	0	Congruent	9056	NA	111_heart_blue_blue.jpg 112_heart_blue_yellow.jpg	2	Y	3.95694
Macaque	Monkey	Blue	43581	37959	MAC-Touch1	Adv Pref FC	Mito	Stroop_3_2_2.csv	9	290	2	None	3000	White	Scattered	121_square_yellow_blue.jpg	122_square_yellow_yellow.jpg	14	18	122_square_yellow_yellow.jpg	Yellow	0	Incongruent	6650	NA	121_square_yellow_blue.jpg 122_square_yellow_yellow.jpg	2	N	3.82282
Macaque	Monkey	Blue	43581	41612	MAC-Touch1	Adv Pref FC	Mito	Stroop_3_2_2.csv	10	290	2	None	3000	White	Scattered	101_bicycle_blue.JPG	102_bicycle_yellow.JPG	18	14	101_bicycle_blue.JPG	Blue	1	Control	1270	NA	101_bicycle_blue.JPG 102_bicycle_yellow.JPG	2	N	3.1038
Macaque	Monkey	Blue	43581	43073	MAC-Touch1	Adv Pref FC	Mito	Stroop_3_2_2.csv	11	290	2	None	3000	White	Scattered	105_cross_yellow_blue.jpg	106_cross_yellow_yellow.jpg	25	17	105_cross_yellow_blue.jpg	Blue	1	Incongruent	5153	NA	105_cross_yellow_blue.jpg 106_cross_yellow_yellow.jpg	2	N	3.71206
Macaque	Monkey	Blue	43581	45995	MAC-Touch1	Adv Pref FC	Mito	Stroop_3_2_2.csv	12	290	2	None	3000	White	Scattered	107_fidget_spinner_blue.jpg	108_fidget_spinner_yellow.jpg	24	19	108_fidget_spinner_yellow.jpg	Yellow	0	Control	3654	NA	107_fidget_spinner_blue.jpg 108_fidget_spinner_yellow.jpg	2	N	3.56277
Macaque	Monkey	Blue	43581	12027	MAC-Touch1	Adv Pref FC	Mito	Stroop_3_2_2.csv	13	290	2	None	3000	White	Scattered	125_star_yellow_blue.jpg	126_star_yellow_yellow.jpg	13	12	125_star_yellow_blue.jpg	Blue	1	Incongruent	4048	NA	125_star_yellow_blue.jpg 126_star_yellow_yellow.jpg	2	N	3.60724
Macaque	Monkey	Blue	43581	14583	MAC-Touch1	Adv Pref FC	Mito	Stroop_3_2_2.csv	14	290	2	None	3000	White	Scattered	103_cross_blue_blue.JPG	104_cross_blue_yellow.JPG	14	16	103_cross_blue_blue.JPG	Blue	1	Congruent	3892	NA	103_cross_blue_blue.JPG 104_cross_blue_yellow.JPG	2	N	3.59017
Macaque	Monkey	Blue	43581	17140	MAC-Touch1	Adv Pref FC	Mito	Stroop_3_2_2.csv	15	290	2	None	3000	White	Scattered	109_fork_blue.jpg	110_fork_yellow.jpg	24	23	109_fork_blue.jpg	Blue	1	Control	6073	NA	109_fork_blue.jpg 110_fork_yellow.jpg	2	N	3.7834
Macaque	Monkey	Blue	43581	20427	MAC-Touch1	Adv Pref FC	Mito	Stroop_3_2_2.csv	16	290	2	None	3000	White	Scattered	121_square_yellow_blue.jpg	122_square_yellow_yellow.jpg	17	13	121_square_yellow_blue.jpg	Blue	1	Incongruent	4046	NA	121_square_yellow_blue.jpg 122_square_yellow_yellow.jpg	2	N	3.60703
Macaque	Monkey	Blue	43581	37960	MAC-Touch1	Adv Pref FC	Mito	Stroop_3_2_2.csv	17	290	2	None	3000	White	Scattered	119_square_blue_blue.jpg	120_square_blue_yellow.jpg	15	24	120_square_blue_yellow.jpg	Yellow	0	Congruent	1371	NA	119_square_blue_blue.jpg 120_square_blue_yellow.jpg	2	N	3.13704
Macaque	Monkey	Blue	43581	12029	MAC-Touch1	Adv Pref FC	Mito	Stroop_3_2_2.csv	18	290	2	None	3000	White	Scattered	113_heart_yellow_blue.jpg	114_heart_yellow_yellow.jpg	15	25	113_heart_yellow_blue.jpg	Blue	1	Incongruent	1554	NA	113_heart_yellow_blue.jpg 114_heart_yellow_yellow.jpg	2	N	3.19145
Macaque	Monkey	Blue	43581	13855	MAC-Touch1	Adv Pref FC	Mito	Stroop_3_2_2.csv	19	290	2	None	3000	White	Scattered	117_shovel_blue.jpg	118_shovel_yellow.jpg	15	20	117_shovel_blue.jpg	Blue	1	Control	3718	NA	117_shovel_blue.jpg 118_shovel_yellow.jpg	2	N	3.57031
Macaque	Monkey	Blue	43581	16412	MAC-Touch1	Adv Pref FC	Mito	Stroop_3_2_2.csv	20	290	2	None	3000	White	Scattered	103_cross_blue_blue.JPG	104_cross_blue_yellow.JPG	19	16	103_cross_blue_blue.JPG	Blue	1	Congruent	2042	NA	103_cross_blue_blue.JPG 104_cross_blue_yellow.JPG	2	N	3.31006
Macaque	Monkey	Blue	43581	18238	MAC-Touch1	Adv Pref FC	Mito	Stroop_3_2_2.csv	21	290	2	None	3000	White	Scattered	107_fidget_spinner_blue.jpg	108_fidget_spinner_yellow.jpg	18	14	107_fidget_spinner_blue.jpg	Blue	1	Control	4088	NA	107_fidget_spinner_blue.jpg 108_fidget_spinner_yellow.jpg	2	N	3.61151
Macaque	Monkey	Blue	43581	20795	MAC-Touch1	Adv Pref FC	Mito	Stroop_3_2_2.csv	22	290	2	None	3000	White	Scattered	123_star_blue_blue.jpg	124_star_blue_yellow.jpg	11	23	124_star_blue_yellow.jpg	Yellow	0	Congruent	8082	NA	123_star_blue_blue.jpg 124_star_blue_yellow.jpg	2	N	3.90752
Macaque	Monkey	Blue	43581	39789	MAC-Touch1	Adv Pref FC	Mito	Stroop_3_2_2.csv	23	290	2	None	3000	White	Scattered	113_heart_yellow_blue.jpg	114_heart_yellow_yellow.jpg	12	22	113_heart_yellow_blue.jpg	Blue	1	Incongruent	5016	NA	113_heart_yellow_blue.jpg 114_heart_yellow_yellow.jpg	2	N	3.70036
Macaque	Monkey	Blue	43581	42711	MAC-Touch1	Adv Pref FC	Mito	Stroop_3_2_2.csv	24	290	2	None	3000	White	Scattered	119_square_blue_blue.jpg	120_square_blue_yellow.jpg	16	14	119_square_blue_blue.jpg	Blue	1	Congruent	3610	NA	119_square_blue_blue.jpg 120_square_blue_yellow.jpg	2	N	3.55751
Macaque	Monkey	Blue	43581	44902	MAC-Touch1	Adv Pref FC	Mito	Stroop_3_2_2.csv	25	290	2	None	3000	White	Scattered	117_shovel_blue.jpg	118_shovel_yellow.jpg	22	14	117_shovel_blue.jpg	Blue	1	Control	4627	NA	117_shovel_blue.jpg 118_shovel_yellow.jpg	2	N	3.6653
Macaque	Monkey	Blue	43581	11299	MAC-Touch1	Adv Pref FC	Mito	Stroop_3_2_2.csv	26	290	2	None	3000	White	Scattered	105_cross_yellow_blue.jpg	106_cross_yellow_yellow.jpg	16	21	105_cross_yellow_blue.jpg	Blue	1	Incongruent	2640	NA	105_cross_yellow_blue.jpg 106_cross_yellow_yellow.jpg	2	N	3.4216
Macaque	Monkey	Blue	43581	13491	MAC-Touch1	Adv Pref FC	Mito	Stroop_3_2_2.csv	27	290	2	None	3000	White	Scattered	123_star_blue_blue.jpg	124_star_blue_yellow.jpg	14	21	123_star_blue_blue.jpg	Blue	1	Congruent	3511	NA	123_star_blue_blue.jpg 124_star_blue_yellow.jpg	2	N	3.54543
Macaque	Monkey	Blue	43581	16047	MAC-Touch1	Adv Pref FC	Mito	Stroop_3_2_2.csv	28	290	2	None	3000	White	Scattered	111_heart_blue_blue.jpg	112_heart_blue_yellow.jpg	15	21	111_heart_blue_blue.jpg	Blue	1	Congruent	2595	NA	111_heart_blue_blue.jpg 112_heart_blue_yellow.jpg	2	N	3.41414
Macaque	Monkey	Blue	43581	17874	MAC-Touch1	Adv Pref FC	Mito	Stroop_3_2_2.csv	29	290	2	None	3000	White	Scattered	101_bicycle_blue.JPG	102_bicycle_yellow.JPG	20	24	101_bicycle_blue.JPG	Blue	1	Control	4029	NA	101_bicycle_blue.JPG 102_bicycle_yellow.JPG	2	N	3.6052
Macaque	Monkey	Blue	43581	20430	MAC-Touch1	Adv Pref FC	Mito	Stroop_3_2_2.csv	30	290	2	None	3000	White	Scattered	103_cross_blue_blue.JPG	104_cross_blue_yellow.JPG	23	18	104_cross_blue_yellow.JPG	Yellow	0	Congruent	1484	NA	103_cross_blue_blue.JPG 104_cross_blue_yellow.JPG	2	N	3.17143
Macaque	Monkey	Blue	43588	11-59-00	MAC-Touch1	Adv Pref FC	Mito	Stroop_3_2_3.csv	1	290	2	None	3000	White	Scattered	119_square_blue_blue.jpg	120_square_blue_yellow.jpg	23	16	119_square_blue_blue.jpg	Blue	1	Congruent	1064	NA	119_square_blue_blue.jpg 120_square_blue_yellow.jpg	3	N	3.02694
Macaque	Monkey	Blue	43588	11-59-04	MAC-Touch1	Adv Pref FC	Mito	Stroop_3_2_3.csv	2	290	2	None	3000	White	Scattered	125_star_yellow_blue.jpg	126_star_yellow_yellow.jpg	14	19	125_star_yellow_blue.jpg	Blue	1	Incongruent	2927	NA	125_star_yellow_blue.jpg 126_star_yellow_yellow.jpg	3	N	3.46642
Macaque	Monkey	Blue	43588	11-59-10	MAC-Touch1	Adv Pref FC	Mito	Stroop_3_2_3.csv	3	290	2	None	3000	White	Scattered	111_heart_blue_blue.jpg	112_heart_blue_yellow.jpg	14	22	111_heart_blue_blue.jpg	Blue	1	Congruent	2676	NA	111_heart_blue_blue.jpg 112_heart_blue_yellow.jpg	3	N	3.42749
Macaque	Monkey	Blue	43588	11-59-16	MAC-Touch1	Adv Pref FC	Mito	Stroop_3_2_3.csv	4	290	2	None	3000	White	Scattered	105_cross_yellow_blue.jpg	106_cross_yellow_yellow.jpg	14	24	105_cross_yellow_blue.jpg	Blue	1	Incongruent	2737	NA	105_cross_yellow_blue.jpg 106_cross_yellow_yellow.jpg	3	N	3.43727
Macaque	Monkey	Blue	43588	11-59-22	MAC-Touch1	Adv Pref FC	Mito	Stroop_3_2_3.csv	5	290	2	None	3000	White	Scattered	115_mug_blue.jpg	116_mug_yellow.jpg	16	15	115_mug_blue.jpg	Blue	1	Control	4322	NA	115_mug_blue.jpg 116_mug_yellow.jpg	3	N	3.63568
Macaque	Monkey	Blue	43588	11-59-29	MAC-Touch1	Adv Pref FC	Mito	Stroop_3_2_3.csv	6	290	2	None	3000	White	Scattered	113_heart_yellow_blue.jpg	114_heart_yellow_yellow.jpg	25	13	113_heart_yellow_blue.jpg	Blue	1	Incongruent	2349	NA	113_heart_yellow_blue.jpg 114_heart_yellow_yellow.jpg	3	N	3.37088
Macaque	Monkey	Blue	43588	11-59-35	MAC-Touch1	Adv Pref FC	Mito	Stroop_3_2_3.csv	7	290	2	None	3000	White	Scattered	103_cross_blue_blue.JPG	104_cross_blue_yellow.JPG	16	19	104_cross_blue_yellow.JPG	Yellow	0	Congruent	3135	NA	103_cross_blue_blue.JPG 104_cross_blue_yellow.JPG	3	N	3.49624
Macaque	Monkey	Blue	43588	11-59-41	MAC-Touch1	Adv Pref FC	Mito	Stroop_3_2_3.csv	8	290	2	None	3000	White	Scattered	101_bicycle_blue.JPG	102_bicycle_yellow.JPG	18	12	101_bicycle_blue.JPG	Blue	1	Control	1477	NA	101_bicycle_blue.JPG 102_bicycle_yellow.JPG	3	N	3.16938
Macaque	Monkey	Blue	43588	11-59-46	MAC-Touch1	Adv Pref FC	Mito	Stroop_3_2_3.csv	9	290	2	None	3000	White	Scattered	103_cross_blue_blue.JPG	104_cross_blue_yellow.JPG	24	12	103_cross_blue_blue.JPG	Blue	1	Congruent	4554	NA	103_cross_blue_blue.JPG 104_cross_blue_yellow.JPG	3	N	3.65839
Macaque	Monkey	Blue	43588	11-59-53	MAC-Touch1	Adv Pref FC	Mito	Stroop_3_2_3.csv	10	290	2	None	3000	White	Scattered	109_fork_blue.jpg	110_fork_yellow.jpg	22	24	109_fork_blue.jpg	Blue	1	Control	2329	NA	109_fork_blue.jpg 110_fork_yellow.jpg	3	N	3.36717
Macaque	Monkey	Blue	43588	11-59-59	MAC-Touch1	Adv Pref FC	Mito	Stroop_3_2_3.csv	11	290	2	None	3000	White	Scattered	123_star_blue_blue.jpg	124_star_blue_yellow.jpg	22	18	124_star_blue_yellow.jpg	Yellow	0	Congruent	2821	NA	123_star_blue_blue.jpg 124_star_blue_yellow.jpg	3	N	3.4504
Macaque	Monkey	Blue	43588	12-00-05	MAC-Touch1	Adv Pref FC	Mito	Stroop_3_2_3.csv	12	290	2	None	3000	White	Scattered	105_cross_yellow_blue.jpg	106_cross_yellow_yellow.jpg	18	21	105_cross_yellow_blue.jpg	Blue	1	Incongruent	5468	NA	105_cross_yellow_blue.jpg 106_cross_yellow_yellow.jpg	3	N	3.73783
Macaque	Monkey	Blue	43588	12-00-13	MAC-Touch1	Adv Pref FC	Mito	Stroop_3_2_3.csv	13	290	2	None	3000	White	Scattered	101_bicycle_blue.JPG	102_bicycle_yellow.JPG	18	12	101_bicycle_blue.JPG	Blue	1	Control	2904	NA	101_bicycle_blue.JPG 102_bicycle_yellow.JPG	3	N	3.463
Macaque	Monkey	Blue	43588	12-00-19	MAC-Touch1	Adv Pref FC	Mito	Stroop_3_2_3.csv	14	290	2	None	3000	White	Scattered	121_square_yellow_blue.jpg	122_square_yellow_yellow.jpg	18	11	121_square_yellow_blue.jpg	Blue	1	Incongruent	7991	NA	121_square_yellow_blue.jpg 122_square_yellow_yellow.jpg	3	N	3.9026
Macaque	Monkey	Blue	43588	12-00-30	MAC-Touch1	Adv Pref FC	Mito	Stroop_3_2_3.csv	15	290	2	None	3000	White	Scattered	119_square_blue_blue.jpg	120_square_blue_yellow.jpg	13	22	119_square_blue_blue.jpg	Blue	1	Congruent	1766	NA	119_square_blue_blue.jpg 120_square_blue_yellow.jpg	3	N	3.24699
Macaque	Monkey	Blue	43588	12-00-35	MAC-Touch1	Adv Pref FC	Mito	Stroop_3_2_3.csv	16	290	2	None	3000	White	Scattered	121_square_yellow_blue.jpg	122_square_yellow_yellow.jpg	17	14	121_square_yellow_blue.jpg	Blue	1	Incongruent	4470	NA	121_square_yellow_blue.jpg 122_square_yellow_yellow.jpg	3	N	3.65031
Macaque	Monkey	Blue	43588	12-00-43	MAC-Touch1	Adv Pref FC	Mito	Stroop_3_2_3.csv	17	290	2	None	3000	White	Scattered	109_fork_blue.jpg	110_fork_yellow.jpg	17	25	109_fork_blue.jpg	Blue	1	Control	4358	NA	109_fork_blue.jpg 110_fork_yellow.jpg	3	N	3.63929
Macaque	Monkey	Blue	43588	12-00-50	MAC-Touch1	Adv Pref FC	Mito	Stroop_3_2_3.csv	18	290	2	None	3000	White	Scattered	111_heart_blue_blue.jpg	112_heart_blue_yellow.jpg	13	23	111_heart_blue_blue.jpg	Blue	1	Congruent	3626	NA	111_heart_blue_blue.jpg 112_heart_blue_yellow.jpg	3	N	3.55943
Macaque	Monkey	Blue	43588	12-00-57	MAC-Touch1	Adv Pref FC	Mito	Stroop_3_2_3.csv	19	290	2	None	3000	White	Scattered	107_fidget_spinner_blue.jpg	108_fidget_spinner_yellow.jpg	12	19	107_fidget_spinner_blue.jpg	Blue	1	Control	2904	NA	107_fidget_spinner_blue.jpg 108_fidget_spinner_yellow.jpg	3	N	3.463
Macaque	Monkey	Blue	43588	37956	MAC-Touch1	Adv Pref FC	Mito	Stroop_3_2_3.csv	20	290	2	None	3000	White	Scattered	119_square_blue_blue.jpg	120_square_blue_yellow.jpg	19	25	119_square_blue_blue.jpg	Blue	1	Congruent	1673	NA	119_square_blue_blue.jpg 120_square_blue_yellow.jpg	3	N	3.2235
Macaque	Monkey	Blue	43588	39783	MAC-Touch1	Adv Pref FC	Mito	Stroop_3_2_3.csv	21	290	2	None	3000	White	Scattered	121_square_yellow_blue.jpg	122_square_yellow_yellow.jpg	19	24	121_square_yellow_blue.jpg	Blue	1	Incongruent	6885	NA	121_square_yellow_blue.jpg 122_square_yellow_yellow.jpg	3	N	3.8379
Macaque	Monkey	Blue	43588	43435	MAC-Touch1	Adv Pref FC	Mito	Stroop_3_2_3.csv	22	290	2	None	3000	White	Scattered	117_shovel_blue.jpg	118_shovel_yellow.jpg	24	21	117_shovel_blue.jpg	Blue	1	Control	2160	NA	117_shovel_blue.jpg 118_shovel_yellow.jpg	3	N	3.33445
Macaque	Monkey	Blue	43588	45261	MAC-Touch1	Adv Pref FC	Mito	Stroop_3_2_3.csv	23	290	2	None	3000	White	Scattered	113_heart_yellow_blue.jpg	114_heart_yellow_yellow.jpg	23	11	113_heart_yellow_blue.jpg	Blue	1	Incongruent	3793	NA	113_heart_yellow_blue.jpg 114_heart_yellow_yellow.jpg	3	N	3.57898
Macaque	Monkey	Blue	43588	11293	MAC-Touch1	Adv Pref FC	Mito	Stroop_3_2_3.csv	24	290	2	None	3000	White	Scattered	115_mug_blue.jpg	116_mug_yellow.jpg	17	25	115_mug_blue.jpg	Blue	1	Control	3232	NA	115_mug_blue.jpg 116_mug_yellow.jpg	3	N	3.50947
Macaque	Monkey	Blue	43588	13485	MAC-Touch1	Adv Pref FC	Mito	Stroop_3_2_3.csv	25	290	2	None	3000	White	Scattered	111_heart_blue_blue.jpg	112_heart_blue_yellow.jpg	20	11	111_heart_blue_blue.jpg	Blue	1	Congruent	1525	NA	111_heart_blue_blue.jpg 112_heart_blue_yellow.jpg	3	N	3.18327
Macaque	Monkey	Blue	43588	15311	MAC-Touch1	Adv Pref FC	Mito	Stroop_3_2_3.csv	26	290	2	None	3000	White	Scattered	125_star_yellow_blue.jpg	126_star_yellow_yellow.jpg	24	15	125_star_yellow_blue.jpg	Blue	1	Incongruent	1987	NA	125_star_yellow_blue.jpg 126_star_yellow_yellow.jpg	3	N	3.2982
Macaque	Monkey	Blue	43588	17137	MAC-Touch1	Adv Pref FC	Mito	Stroop_3_2_3.csv	27	290	2	None	3000	White	Scattered	117_shovel_blue.jpg	118_shovel_yellow.jpg	17	21	117_shovel_blue.jpg	Blue	1	Control	1742	NA	117_shovel_blue.jpg 118_shovel_yellow.jpg	3	N	3.24105
Macaque	Monkey	Blue	43588	18963	MAC-Touch1	Adv Pref FC	Mito	Stroop_3_2_3.csv	28	290	2	None	3000	White	Scattered	113_heart_yellow_blue.jpg	114_heart_yellow_yellow.jpg	23	22	113_heart_yellow_blue.jpg	Blue	1	Incongruent	2189	NA	113_heart_yellow_blue.jpg 114_heart_yellow_yellow.jpg	3	N	3.34025
Macaque	Monkey	Blue	43588	20790	MAC-Touch1	Adv Pref FC	Mito	Stroop_3_2_3.csv	29	290	2	None	3000	White	Scattered	107_fidget_spinner_blue.jpg	108_fidget_spinner_yellow.jpg	15	24	107_fidget_spinner_blue.jpg	Blue	1	Control	2565	NA	107_fidget_spinner_blue.jpg 108_fidget_spinner_yellow.jpg	3	N	3.40909
Macaque	Monkey	Blue	43588	37592	MAC-Touch1	Adv Pref FC	Mito	Stroop_3_2_3.csv	30	290	2	None	3000	White	Scattered	123_star_blue_blue.jpg	124_star_blue_yellow.jpg	25	13	123_star_blue_blue.jpg	Blue	1	Congruent	2060	NA	123_star_blue_blue.jpg 124_star_blue_yellow.jpg	3	N	3.31387
Macaque	Monkey	Blue	43598	20791	RMF-CogBooth	Adv Pref FC	Mito	Stroop_3_2_4.csv	1	290	2	None	3000	White	Scattered	123_star_blue_blue.jpg	124_star_blue_yellow.jpg	11	20	124_star_blue_yellow.jpg	Yellow	0	Congruent	9059	NA	123_star_blue_blue.jpg 124_star_blue_yellow.jpg	4	Y	3.95708
Macaque	Monkey	Blue	43598	39785	RMF-CogBooth	Adv Pref FC	Mito	Stroop_3_2_4.csv	2	290	2	None	3000	White	Scattered	115_mug_blue.jpg	116_mug_yellow.jpg	16	12	116_mug_yellow.jpg	Yellow	0	Control	1379	NA	115_mug_blue.jpg 116_mug_yellow.jpg	4	N	3.13956
Macaque	Monkey	Blue	43598	41246	RMF-CogBooth	Adv Pref FC	Mito	Stroop_3_2_4.csv	3	290	2	None	3000	White	Scattered	105_cross_yellow_blue.jpg	106_cross_yellow_yellow.jpg	15	12	105_cross_yellow_blue.jpg	Blue	1	Incongruent	6657	NA	105_cross_yellow_blue.jpg 106_cross_yellow_yellow.jpg	4	N	3.82328
Macaque	Monkey	Blue	43598	44898	RMF-CogBooth	Adv Pref FC	Mito	Stroop_3_2_4.csv	4	290	2	None	3000	White	Scattered	109_fork_blue.jpg	110_fork_yellow.jpg	17	22	109_fork_blue.jpg	Blue	1	Control	2516	NA	109_fork_blue.jpg 110_fork_yellow.jpg	4	N	3.40071
Macaque	Monkey	Blue	43598	47090	RMF-CogBooth	Adv Pref FC	Mito	Stroop_3_2_4.csv	5	290	2	None	3000	White	Scattered	123_star_blue_blue.jpg	124_star_blue_yellow.jpg	13	11	123_star_blue_blue.jpg	Blue	1	Congruent	2912	NA	123_star_blue_blue.jpg 124_star_blue_yellow.jpg	4	N	3.46419
Macaque	Monkey	Blue	43598	12756	RMF-CogBooth	Adv Pref FC	Mito	Stroop_3_2_4.csv	6	290	2	None	3000	White	Scattered	113_heart_yellow_blue.jpg	114_heart_yellow_yellow.jpg	21	17	114_heart_yellow_yellow.jpg	Yellow	0	Incongruent	2745	NA	113_heart_yellow_blue.jpg 114_heart_yellow_yellow.jpg	4	N	3.43854
Macaque	Monkey	Blue	43598	14948	RMF-CogBooth	Adv Pref FC	Mito	Stroop_3_2_4.csv	7	290	2	None	3000	White	Scattered	117_shovel_blue.jpg	118_shovel_yellow.jpg	18	17	117_shovel_blue.jpg	Blue	1	Control	1108	NA	117_shovel_blue.jpg 118_shovel_yellow.jpg	4	N	3.04454
Macaque	Monkey	Blue	43598	37229	RMF-CogBooth	Adv Pref FC	Mito	Stroop_3_2_4.csv	8	290	2	None	3000	White	Scattered	125_star_yellow_blue.jpg	126_star_yellow_yellow.jpg	17	12	126_star_yellow_yellow.jpg	Yellow	0	Incongruent	1250	NA	125_star_yellow_blue.jpg 126_star_yellow_yellow.jpg	4	N	3.09691
Macaque	Monkey	Blue	43598	38690	RMF-CogBooth	Adv Pref FC	Mito	Stroop_3_2_4.csv	9	290	2	None	3000	White	Scattered	109_fork_blue.jpg	110_fork_yellow.jpg	11	13	109_fork_blue.jpg	Blue	1	Control	1243	NA	109_fork_blue.jpg 110_fork_yellow.jpg	4	N	3.09447
Macaque	Monkey	Blue	43598	40516	RMF-CogBooth	Adv Pref FC	Mito	Stroop_3_2_4.csv	10	290	2	None	3000	White	Scattered	113_heart_yellow_blue.jpg	114_heart_yellow_yellow.jpg	23	24	113_heart_yellow_blue.jpg	Blue	1	Incongruent	4480	NA	113_heart_yellow_blue.jpg 114_heart_yellow_yellow.jpg	4	N	3.65128
Macaque	Monkey	Blue	43598	43073	RMF-CogBooth	Adv Pref FC	Mito	Stroop_3_2_4.csv	11	290	2	None	3000	White	Scattered	111_heart_blue_blue.jpg	112_heart_blue_yellow.jpg	13	23	112_heart_blue_yellow.jpg	Yellow	0	Congruent	3588	NA	111_heart_blue_blue.jpg 112_heart_blue_yellow.jpg	4	N	3.55485
Macaque	Monkey	Blue	43598	45630	RMF-CogBooth	Adv Pref FC	Mito	Stroop_3_2_4.csv	12	290	2	None	3000	White	Scattered	119_square_blue_blue.jpg	120_square_blue_yellow.jpg	13	22	119_square_blue_blue.jpg	Blue	1	Congruent	2393	NA	119_square_blue_blue.jpg 120_square_blue_yellow.jpg	4	N	3.37894
Macaque	Monkey	Blue	43598	11296	RMF-CogBooth	Adv Pref FC	Mito	Stroop_3_2_4.csv	13	290	2	None	3000	White	Scattered	105_cross_yellow_blue.jpg	106_cross_yellow_yellow.jpg	24	14	105_cross_yellow_blue.jpg	Blue	1	Incongruent	3909	NA	105_cross_yellow_blue.jpg 106_cross_yellow_yellow.jpg	4	N	3.59207
Macaque	Monkey	Blue	43598	13853	RMF-CogBooth	Adv Pref FC	Mito	Stroop_3_2_4.csv	14	290	2	None	3000	White	Scattered	101_bicycle_blue.JPG	102_bicycle_yellow.JPG	24	19	101_bicycle_blue.JPG	Blue	1	Control	2046	NA	101_bicycle_blue.JPG 102_bicycle_yellow.JPG	4	N	3.31091
Macaque	Monkey	Blue	43598	15679	RMF-CogBooth	Adv Pref FC	Mito	Stroop_3_2_4.csv	15	290	2	None	3000	White	Scattered	119_square_blue_blue.jpg	120_square_blue_yellow.jpg	21	25	119_square_blue_blue.jpg	Blue	1	Congruent	1516	NA	119_square_blue_blue.jpg 120_square_blue_yellow.jpg	4	N	3.1807
Macaque	Monkey	Blue	43599	11-59-14	MAC-Touch1	Adv Pref FC	Mito	Stroop_3_2_1.csv	1	290	2	None	3000	White	Scattered	113_heart_yellow_blue.jpg	114_heart_yellow_yellow.jpg	11	17	114_heart_yellow_yellow.jpg	Yellow	0	Incongruent	1393	NA	113_heart_yellow_blue.jpg 114_heart_yellow_yellow.jpg	5	N	3.14395
Macaque	Monkey	Blue	43599	11-59-18	MAC-Touch1	Adv Pref FC	Mito	Stroop_3_2_1.csv	2	290	2	None	3000	White	Scattered	103_cross_blue_blue.JPG	104_cross_blue_yellow.JPG	13	22	103_cross_blue_blue.JPG	Blue	1	Congruent	2624	NA	103_cross_blue_blue.JPG 104_cross_blue_yellow.JPG	5	N	3.41896
Macaque	Monkey	Blue	43599	11-59-24	MAC-Touch1	Adv Pref FC	Mito	Stroop_3_2_1.csv	3	290	2	None	3000	White	Scattered	121_square_yellow_blue.jpg	122_square_yellow_yellow.jpg	25	14	121_square_yellow_blue.jpg	Blue	1	Incongruent	2766	NA	121_square_yellow_blue.jpg 122_square_yellow_yellow.jpg	5	N	3.44185
Macaque	Monkey	Blue	43599	11-59-30	MAC-Touch1	Adv Pref FC	Mito	Stroop_3_2_1.csv	4	290	2	None	3000	White	Scattered	117_shovel_blue.jpg	118_shovel_yellow.jpg	25	19	118_shovel_yellow.jpg	Yellow	0	Control	2719	NA	117_shovel_blue.jpg 118_shovel_yellow.jpg	5	N	3.43441
Macaque	Monkey	Blue	43599	11-59-36	MAC-Touch1	Adv Pref FC	Mito	Stroop_3_2_1.csv	5	290	2	None	3000	White	Scattered	123_star_blue_blue.jpg	124_star_blue_yellow.jpg	23	20	123_star_blue_blue.jpg	Blue	1	Congruent	4926	NA	123_star_blue_blue.jpg 124_star_blue_yellow.jpg	5	N	3.69249
Macaque	Monkey	Blue	43599	11-59-44	MAC-Touch1	Adv Pref FC	Mito	Stroop_3_2_1.csv	6	290	2	None	3000	White	Scattered	109_fork_blue.jpg	110_fork_yellow.jpg	21	18	110_fork_yellow.jpg	Yellow	0	Control	4979	NA	109_fork_blue.jpg 110_fork_yellow.jpg	5	N	3.69714
Macaque	Monkey	Blue	43599	11-59-52	MAC-Touch1	Adv Pref FC	Mito	Stroop_3_2_1.csv	7	290	2	None	3000	White	Scattered	121_square_yellow_blue.jpg	122_square_yellow_yellow.jpg	17	11	121_square_yellow_blue.jpg	Blue	1	Incongruent	2780	NA	121_square_yellow_blue.jpg 122_square_yellow_yellow.jpg	5	N	3.44404
Macaque	Monkey	Blue	43599	11-59-58	MAC-Touch1	Adv Pref FC	Mito	Stroop_3_2_1.csv	8	290	2	None	3000	White	Scattered	111_heart_blue_blue.jpg	112_heart_blue_yellow.jpg	24	16	111_heart_blue_blue.jpg	Blue	1	Congruent	3773	NA	111_heart_blue_blue.jpg 112_heart_blue_yellow.jpg	5	N	3.57669
Macaque	Monkey	Blue	43599	12-00-05	MAC-Touch1	Adv Pref FC	Mito	Stroop_3_2_1.csv	9	290	2	None	3000	White	Scattered	125_star_yellow_blue.jpg	126_star_yellow_yellow.jpg	21	13	125_star_yellow_blue.jpg	Blue	1	Incongruent	4704	NA	125_star_yellow_blue.jpg 126_star_yellow_yellow.jpg	5	N	3.67247
Macaque	Monkey	Blue	43599	12-00-13	MAC-Touch1	Adv Pref FC	Mito	Stroop_3_2_1.csv	10	290	2	None	3000	White	Scattered	107_fidget_spinner_blue.jpg	108_fidget_spinner_yellow.jpg	23	21	107_fidget_spinner_blue.jpg	Blue	1	Control	3705	NA	107_fidget_spinner_blue.jpg 108_fidget_spinner_yellow.jpg	5	N	3.56879
Macaque	Monkey	Blue	43599	12-00-19	MAC-Touch1	Adv Pref FC	Mito	Stroop_3_2_1.csv	11	290	2	None	3000	White	Scattered	121_square_yellow_blue.jpg	122_square_yellow_yellow.jpg	18	13	121_square_yellow_blue.jpg	Blue	1	Incongruent	3065	NA	121_square_yellow_blue.jpg 122_square_yellow_yellow.jpg	5	N	3.48643
Macaque	Monkey	Blue	43599	12-00-26	MAC-Touch1	Adv Pref FC	Mito	Stroop_3_2_1.csv	12	290	2	None	3000	White	Scattered	111_heart_blue_blue.jpg	112_heart_blue_yellow.jpg	14	15	111_heart_blue_blue.jpg	Blue	1	Congruent	2957	NA	111_heart_blue_blue.jpg 112_heart_blue_yellow.jpg	5	N	3.47085
Macaque	Monkey	Blue	43599	12-00-32	MAC-Touch1	Adv Pref FC	Mito	Stroop_3_2_1.csv	13	290	2	None	3000	White	Scattered	119_square_blue_blue.jpg	120_square_blue_yellow.jpg	11	21	120_square_blue_yellow.jpg	Yellow	0	Congruent	6399	NA	119_square_blue_blue.jpg 120_square_blue_yellow.jpg	5	N	3.80611
Macaque	Monkey	Blue	43599	12-00-41	MAC-Touch1	Adv Pref FC	Mito	Stroop_3_2_1.csv	14	290	2	None	3000	White	Scattered	113_heart_yellow_blue.jpg	114_heart_yellow_yellow.jpg	15	24	114_heart_yellow_yellow.jpg	Yellow	0	Incongruent	1304	NA	113_heart_yellow_blue.jpg 114_heart_yellow_yellow.jpg	5	N	3.11528
Macaque	Monkey	Blue	43599	12-00-46	MAC-Touch1	Adv Pref FC	Mito	Stroop_3_2_1.csv	15	290	2	None	3000	White	Scattered	109_fork_blue.jpg	110_fork_yellow.jpg	17	22	109_fork_blue.jpg	Blue	1	Control	2030	NA	109_fork_blue.jpg 110_fork_yellow.jpg	5	N	3.3075
Macaque	Monkey	Blue	43599	12-00-51	MAC-Touch1	Adv Pref FC	Mito	Stroop_3_2_1.csv	16	290	2	None	3000	White	Scattered	111_heart_blue_blue.jpg	112_heart_blue_yellow.jpg	13	17	111_heart_blue_blue.jpg	Blue	1	Congruent	3593	NA	111_heart_blue_blue.jpg 112_heart_blue_yellow.jpg	5	N	3.55546
Macaque	Monkey	Blue	43599	12-00-57	MAC-Touch1	Adv Pref FC	Mito	Stroop_3_2_1.csv	17	290	2	None	3000	White	Scattered	103_cross_blue_blue.JPG	104_cross_blue_yellow.JPG	21	24	104_cross_blue_yellow.JPG	Yellow	0	Congruent	3310	NA	103_cross_blue_blue.JPG 104_cross_blue_yellow.JPG	5	N	3.51983
Macaque	Monkey	Blue	43599	38322	MAC-Touch1	Adv Pref FC	Mito	Stroop_3_2_1.csv	18	290	2	None	3000	White	Scattered	101_bicycle_blue.JPG	102_bicycle_yellow.JPG	13	23	101_bicycle_blue.JPG	Blue	1	Control	2875	NA	101_bicycle_blue.JPG 102_bicycle_yellow.JPG	5	N	3.45864
Macaque	Monkey	Blue	43599	40513	MAC-Touch1	Adv Pref FC	Mito	Stroop_3_2_1.csv	19	290	2	None	3000	White	Scattered	105_cross_yellow_blue.jpg	106_cross_yellow_yellow.jpg	14	22	105_cross_yellow_blue.jpg	Blue	1	Incongruent	13520	NA	105_cross_yellow_blue.jpg 106_cross_yellow_yellow.jpg	5	Y	4.13098
Macaque	Monkey	Blue	43608	36854	MAC-Touch1	Adv Pref FC	Mito	Stroop_3_2_2.csv	1	290	2	None	3000	White	Scattered	115_mug_blue.jpg	116_mug_yellow.jpg	18	15	115_mug_blue.jpg	Blue	1	Control	1491	NA	115_mug_blue.jpg 116_mug_yellow.jpg	6	N	3.17348
Macaque	Monkey	Blue	43608	38680	MAC-Touch1	Adv Pref FC	Mito	Stroop_3_2_2.csv	2	290	2	None	3000	White	Scattered	125_star_yellow_blue.jpg	126_star_yellow_yellow.jpg	16	24	125_star_yellow_blue.jpg	Blue	1	Incongruent	3287	NA	125_star_yellow_blue.jpg 126_star_yellow_yellow.jpg	6	N	3.5168
Macaque	Monkey	Blue	43608	40871	MAC-Touch1	Adv Pref FC	Mito	Stroop_3_2_2.csv	3	290	2	None	3000	White	Scattered	109_fork_blue.jpg	110_fork_yellow.jpg	19	15	109_fork_blue.jpg	Blue	1	Control	3381	NA	109_fork_blue.jpg 110_fork_yellow.jpg	6	N	3.52905
Macaque	Monkey	Blue	43608	43428	MAC-Touch1	Adv Pref FC	Mito	Stroop_3_2_2.csv	4	290	2	None	3000	White	Scattered	123_star_blue_blue.jpg	124_star_blue_yellow.jpg	12	21	123_star_blue_blue.jpg	Blue	1	Congruent	3074	NA	123_star_blue_blue.jpg 124_star_blue_yellow.jpg	6	N	3.4877
Macaque	Monkey	Blue	43608	45620	MAC-Touch1	Adv Pref FC	Mito	Stroop_3_2_2.csv	5	290	2	None	3000	White	Scattered	105_cross_yellow_blue.jpg	106_cross_yellow_yellow.jpg	17	24	105_cross_yellow_blue.jpg	Blue	1	Incongruent	7776	NA	105_cross_yellow_blue.jpg 106_cross_yellow_yellow.jpg	6	N	3.89076
Macaque	Monkey	Blue	43608	13112	MAC-Touch1	Adv Pref FC	Mito	Stroop_3_2_2.csv	6	290	2	None	3000	White	Scattered	125_star_yellow_blue.jpg	126_star_yellow_yellow.jpg	18	14	125_star_yellow_blue.jpg	Blue	1	Incongruent	2408	NA	125_star_yellow_blue.jpg 126_star_yellow_yellow.jpg	6	N	3.38166
Macaque	Monkey	Blue	43608	14939	MAC-Touch1	Adv Pref FC	Mito	Stroop_3_2_2.csv	7	290	2	None	3000	White	Scattered	115_mug_blue.jpg	116_mug_yellow.jpg	23	24	116_mug_yellow.jpg	Yellow	0	Control	3948	NA	115_mug_blue.jpg 116_mug_yellow.jpg	6	N	3.59638
Macaque	Monkey	Blue	43608	17495	MAC-Touch1	Adv Pref FC	Mito	Stroop_3_2_2.csv	8	290	2	None	3000	White	Scattered	111_heart_blue_blue.jpg	112_heart_blue_yellow.jpg	17	12	111_heart_blue_blue.jpg	Blue	1	Congruent	3169	NA	111_heart_blue_blue.jpg 112_heart_blue_yellow.jpg	6	N	3.50092
Macaque	Monkey	Blue	43608	20052	MAC-Touch1	Adv Pref FC	Mito	Stroop_3_2_2.csv	9	290	2	None	3000	White	Scattered	121_square_yellow_blue.jpg	122_square_yellow_yellow.jpg	13	17	121_square_yellow_blue.jpg	Blue	1	Incongruent	2873	NA	121_square_yellow_blue.jpg 122_square_yellow_yellow.jpg	6	N	3.45834
Macaque	Monkey	Blue	43608	36855	MAC-Touch1	Adv Pref FC	Mito	Stroop_3_2_2.csv	10	290	2	None	3000	White	Scattered	101_bicycle_blue.JPG	102_bicycle_yellow.JPG	15	19	101_bicycle_blue.JPG	Blue	1	Control	5167	NA	101_bicycle_blue.JPG 102_bicycle_yellow.JPG	6	N	3.71324
Macaque	Monkey	Blue	43608	39777	MAC-Touch1	Adv Pref FC	Mito	Stroop_3_2_2.csv	11	290	2	None	3000	White	Scattered	105_cross_yellow_blue.jpg	106_cross_yellow_yellow.jpg	11	18	106_cross_yellow_yellow.jpg	Yellow	0	Incongruent	2864	NA	105_cross_yellow_blue.jpg 106_cross_yellow_yellow.jpg	6	N	3.45697
Macaque	Monkey	Blue	43608	41968	MAC-Touch1	Adv Pref FC	Mito	Stroop_3_2_2.csv	12	290	2	None	3000	White	Scattered	107_fidget_spinner_blue.jpg	108_fidget_spinner_yellow.jpg	24	17	107_fidget_spinner_blue.jpg	Blue	1	Control	2097	NA	107_fidget_spinner_blue.jpg 108_fidget_spinner_yellow.jpg	6	N	3.3216
Macaque	Monkey	Blue	43608	43794	MAC-Touch1	Adv Pref FC	Mito	Stroop_3_2_2.csv	13	290	2	None	3000	White	Scattered	125_star_yellow_blue.jpg	126_star_yellow_yellow.jpg	16	21	125_star_yellow_blue.jpg	Blue	1	Incongruent	8573	NA	125_star_yellow_blue.jpg 126_star_yellow_yellow.jpg	6	Y	3.93313
Macaque	Monkey	Blue	43608	44161	RMF-CogBooth	Adv Pref FC	Mito	Stroop_3_2_3.csv	1	290	2	None	3000	White	Scattered	119_square_blue_blue.jpg	120_square_blue_yellow.jpg	18	14	120_square_blue_yellow.jpg	Yellow	0	Congruent	6572	NA	119_square_blue_blue.jpg 120_square_blue_yellow.jpg	6	N	3.8177
Macaque	Monkey	Blue	43608	47448	RMF-CogBooth	Adv Pref FC	Mito	Stroop_3_2_3.csv	2	290	2	None	3000	White	Scattered	125_star_yellow_blue.jpg	126_star_yellow_yellow.jpg	19	11	125_star_yellow_blue.jpg	Blue	1	Incongruent	5001	NA	125_star_yellow_blue.jpg 126_star_yellow_yellow.jpg	6	N	3.69906
Macaque	Monkey	Blue	43608	13845	RMF-CogBooth	Adv Pref FC	Mito	Stroop_3_2_3.csv	3	290	2	None	3000	White	Scattered	111_heart_blue_blue.jpg	112_heart_blue_yellow.jpg	11	15	112_heart_blue_yellow.jpg	Yellow	0	Congruent	8137	NA	111_heart_blue_blue.jpg 112_heart_blue_yellow.jpg	6	N	3.91046
Macaque	Monkey	Blue	43608	18228	RMF-CogBooth	Adv Pref FC	Mito	Stroop_3_2_3.csv	4	290	2	None	3000	White	Scattered	105_cross_yellow_blue.jpg	106_cross_yellow_yellow.jpg	21	14	106_cross_yellow_yellow.jpg	Yellow	0	Incongruent	2630	NA	105_cross_yellow_blue.jpg 106_cross_yellow_yellow.jpg	6	N	3.41996
Macaque	Monkey	Blue	43608	20054	RMF-CogBooth	Adv Pref FC	Mito	Stroop_3_2_3.csv	5	290	2	None	3000	White	Scattered	115_mug_blue.jpg	116_mug_yellow.jpg	19	16	115_mug_blue.jpg	Blue	1	Control	1225	NA	115_mug_blue.jpg 116_mug_yellow.jpg	6	N	3.08814
Macaque	Monkey	Blue	43608	21880	RMF-CogBooth	Adv Pref FC	Mito	Stroop_3_2_3.csv	6	290	2	None	3000	White	Scattered	113_heart_yellow_blue.jpg	114_heart_yellow_yellow.jpg	17	24	114_heart_yellow_yellow.jpg	Yellow	0	Incongruent	3574	NA	113_heart_yellow_blue.jpg 114_heart_yellow_yellow.jpg	6	N	3.55315
Macaque	Monkey	Blue	43608	38683	RMF-CogBooth	Adv Pref FC	Mito	Stroop_3_2_3.csv	7	290	2	None	3000	White	Scattered	103_cross_blue_blue.JPG	104_cross_blue_yellow.JPG	16	12	103_cross_blue_blue.JPG	Blue	1	Congruent	1770	NA	103_cross_blue_blue.JPG 104_cross_blue_yellow.JPG	6	N	3.24797
Macaque	Monkey	Blue	43608	40509	RMF-CogBooth	Adv Pref FC	Mito	Stroop_3_2_3.csv	8	290	2	None	3000	White	Scattered	101_bicycle_blue.JPG	102_bicycle_yellow.JPG	22	13	102_bicycle_yellow.JPG	Yellow	0	Control	4690	NA	101_bicycle_blue.JPG 102_bicycle_yellow.JPG	6	N	3.67117
Macaque	Monkey	Blue	43608	43431	RMF-CogBooth	Adv Pref FC	Mito	Stroop_3_2_3.csv	9	290	2	None	3000	White	Scattered	103_cross_blue_blue.JPG	104_cross_blue_yellow.JPG	15	12	103_cross_blue_blue.JPG	Blue	1	Congruent	5269	NA	103_cross_blue_blue.JPG 104_cross_blue_yellow.JPG	6	N	3.72173
Macaque	Monkey	Blue	43608	46353	RMF-CogBooth	Adv Pref FC	Mito	Stroop_3_2_3.csv	10	290	2	None	3000	White	Scattered	109_fork_blue.jpg	110_fork_yellow.jpg	23	22	109_fork_blue.jpg	Blue	1	Control	2916	NA	109_fork_blue.jpg 110_fork_yellow.jpg	6	N	3.46479
Macaque	Monkey	Blue	43608	12385	RMF-CogBooth	Adv Pref FC	Mito	Stroop_3_2_3.csv	11	290	2	None	3000	White	Scattered	123_star_blue_blue.jpg	124_star_blue_yellow.jpg	15	25	123_star_blue_blue.jpg	Blue	1	Congruent	16879	NA	123_star_blue_blue.jpg 124_star_blue_yellow.jpg	6	Y	4.22735
Macaque	Monkey	Blue	43608	19690	RMF-CogBooth	Adv Pref FC	Mito	Stroop_3_2_3.csv	12	290	2	None	3000	White	Scattered	105_cross_yellow_blue.jpg	106_cross_yellow_yellow.jpg	17	20	105_cross_yellow_blue.jpg	Blue	1	Incongruent	2987	NA	105_cross_yellow_blue.jpg 106_cross_yellow_yellow.jpg	6	N	3.47524
Macaque	Monkey	Blue	43608	21881	RMF-CogBooth	Adv Pref FC	Mito	Stroop_3_2_3.csv	13	290	2	None	3000	White	Scattered	101_bicycle_blue.JPG	102_bicycle_yellow.JPG	19	24	101_bicycle_blue.JPG	Blue	1	Control	9352	NA	101_bicycle_blue.JPG 102_bicycle_yellow.JPG	6	Y	3.9709
Macaque	Monkey	Blue	43608	40875	RMF-CogBooth	Adv Pref FC	Mito	Stroop_3_2_3.csv	14	290	2	None	3000	White	Scattered	121_square_yellow_blue.jpg	122_square_yellow_yellow.jpg	20	21	121_square_yellow_blue.jpg	Blue	1	Incongruent	4178	NA	121_square_yellow_blue.jpg 122_square_yellow_yellow.jpg	6	N	3.62097
Macaque	Monkey	Blue	43608	43432	RMF-CogBooth	Adv Pref FC	Mito	Stroop_3_2_3.csv	15	290	2	None	3000	White	Scattered	119_square_blue_blue.jpg	120_square_blue_yellow.jpg	11	19	120_square_blue_yellow.jpg	Yellow	0	Congruent	9003	NA	119_square_blue_blue.jpg 120_square_blue_yellow.jpg	6	Y	3.95439
Macaque	Monkey	Blue	43608	11655	RMF-CogBooth	Adv Pref FC	Mito	Stroop_3_2_3.csv	16	290	2	None	3000	White	Scattered	121_square_yellow_blue.jpg	122_square_yellow_yellow.jpg	19	17	121_square_yellow_blue.jpg	Blue	1	Incongruent	5268	NA	121_square_yellow_blue.jpg 122_square_yellow_yellow.jpg	6	N	3.72165
Macaque	Monkey	Blue	43608	14577	RMF-CogBooth	Adv Pref FC	Mito	Stroop_3_2_3.csv	17	290	2	None	3000	White	Scattered	109_fork_blue.jpg	110_fork_yellow.jpg	25	19	109_fork_blue.jpg	Blue	1	Control	2307	NA	109_fork_blue.jpg 110_fork_yellow.jpg	6	N	3.36305
Macaque	Monkey	Blue	43608	16404	RMF-CogBooth	Adv Pref FC	Mito	Stroop_3_2_3.csv	18	290	2	None	3000	White	Scattered	111_heart_blue_blue.jpg	112_heart_blue_yellow.jpg	20	11	111_heart_blue_blue.jpg	Blue	1	Congruent	2065	NA	111_heart_blue_blue.jpg 112_heart_blue_yellow.jpg	6	N	3.31492
Macaque	Monkey	Blue	43608	18595	RMF-CogBooth	Adv Pref FC	Mito	Stroop_3_2_3.csv	19	290	2	None	3000	White	Scattered	107_fidget_spinner_blue.jpg	108_fidget_spinner_yellow.jpg	22	16	107_fidget_spinner_blue.jpg	Blue	1	Control	1535	NA	107_fidget_spinner_blue.jpg 108_fidget_spinner_yellow.jpg	6	N	3.18611
Macaque	Monkey	Blue	43608	20056	RMF-CogBooth	Adv Pref FC	Mito	Stroop_3_2_3.csv	20	290	2	None	3000	White	Scattered	119_square_blue_blue.jpg	120_square_blue_yellow.jpg	11	21	119_square_blue_blue.jpg	Blue	1	Congruent	9488	NA	119_square_blue_blue.jpg 120_square_blue_yellow.jpg	6	Y	3.97717
Macaque	Monkey	Blue	43608	39415	RMF-CogBooth	Adv Pref FC	Mito	Stroop_3_2_3.csv	21	290	2	None	3000	White	Scattered	121_square_yellow_blue.jpg	122_square_yellow_yellow.jpg	12	16	121_square_yellow_blue.jpg	Blue	1	Incongruent	4826	NA	121_square_yellow_blue.jpg 122_square_yellow_yellow.jpg	6	N	3.68359
Macaque	Monkey	Blue	43608	42337	RMF-CogBooth	Adv Pref FC	Mito	Stroop_3_2_3.csv	22	290	2	None	3000	White	Scattered	117_shovel_blue.jpg	118_shovel_yellow.jpg	20	21	117_shovel_blue.jpg	Blue	1	Control	1990	NA	117_shovel_blue.jpg 118_shovel_yellow.jpg	6	N	3.29885
Macaque	Monkey	Blue	43608	44164	RMF-CogBooth	Adv Pref FC	Mito	Stroop_3_2_3.csv	23	290	2	None	3000	White	Scattered	113_heart_yellow_blue.jpg	114_heart_yellow_yellow.jpg	20	15	113_heart_yellow_blue.jpg	Blue	1	Incongruent	6269	NA	113_heart_yellow_blue.jpg 114_heart_yellow_yellow.jpg	6	N	3.7972
Macaque	Monkey	Blue	43608	47451	RMF-CogBooth	Adv Pref FC	Mito	Stroop_3_2_3.csv	24	290	2	None	3000	White	Scattered	115_mug_blue.jpg	116_mug_yellow.jpg	23	20	116_mug_yellow.jpg	Yellow	0	Control	5539	NA	115_mug_blue.jpg 116_mug_yellow.jpg	6	N	3.74343
Macaque	Monkey	Blue	43608	14213	RMF-CogBooth	Adv Pref FC	Mito	Stroop_3_2_3.csv	25	290	2	None	3000	White	Scattered	111_heart_blue_blue.jpg	112_heart_blue_yellow.jpg	23	22	111_heart_blue_blue.jpg	Blue	1	Congruent	1158	NA	111_heart_blue_blue.jpg 112_heart_blue_yellow.jpg	6	N	3.06371
Macaque	Monkey	Blue	43608	15674	RMF-CogBooth	Adv Pref FC	Mito	Stroop_3_2_3.csv	26	290	2	None	3000	White	Scattered	125_star_yellow_blue.jpg	126_star_yellow_yellow.jpg	16	13	126_star_yellow_yellow.jpg	Yellow	0	Incongruent	3143	NA	125_star_yellow_blue.jpg 126_star_yellow_yellow.jpg	6	N	3.49734
Macaque	Monkey	Blue	43608	17866	RMF-CogBooth	Adv Pref FC	Mito	Stroop_3_2_3.csv	27	290	2	None	3000	White	Scattered	117_shovel_blue.jpg	118_shovel_yellow.jpg	22	18	117_shovel_blue.jpg	Blue	1	Control	5499	NA	117_shovel_blue.jpg 118_shovel_yellow.jpg	6	N	3.74028
Macaque	Monkey	Blue	43608	21153	RMF-CogBooth	Adv Pref FC	Mito	Stroop_3_2_3.csv	28	290	2	None	3000	White	Scattered	113_heart_yellow_blue.jpg	114_heart_yellow_yellow.jpg	11	15	114_heart_yellow_yellow.jpg	Yellow	0	Incongruent	5146	NA	113_heart_yellow_blue.jpg 114_heart_yellow_yellow.jpg	6	N	3.71147
Macaque	Monkey	Blue	43608	38686	RMF-CogBooth	Adv Pref FC	Mito	Stroop_3_2_3.csv	29	290	2	None	3000	White	Scattered	107_fidget_spinner_blue.jpg	108_fidget_spinner_yellow.jpg	13	16	107_fidget_spinner_blue.jpg	Blue	1	Control	3791	NA	107_fidget_spinner_blue.jpg 108_fidget_spinner_yellow.jpg	6	N	3.57875
Macaque	Monkey	Blue	43608	41243	RMF-CogBooth	Adv Pref FC	Mito	Stroop_3_2_3.csv	30	290	2	None	3000	White	Scattered	123_star_blue_blue.jpg	124_star_blue_yellow.jpg	16	21	123_star_blue_blue.jpg	Blue	1	Congruent	4904	NA	123_star_blue_blue.jpg 124_star_blue_yellow.jpg	6	N	3.69055
Macaque	Monkey	Blue	43615	11-50-15	MAC-Touch1	Adv Pref FC	Mito	Stroop_3_2_Mito3sec#2.csv	1	290	2	None	3000	White	Scattered	103_cross_blue_blue.JPG	104_cross_blue_yellow.JPG	11	22	103_cross_blue_blue.JPG	Blue	1	Congruent	2215	NA	103_cross_blue_blue.JPG 104_cross_blue_yellow.JPG	7	N	3.34537
Macaque	Monkey	Blue	43615	11-50-21	MAC-Touch1	Adv Pref FC	Mito	Stroop_3_2_Mito3sec#2.csv	2	290	2	None	3000	White	Scattered	109_fork_blue.jpg	110_fork_yellow.jpg	23	20	109_fork_blue.jpg	Blue	1	Control	5768	NA	109_fork_blue.jpg 110_fork_yellow.jpg	7	N	3.76103
Macaque	Monkey	Blue	43615	11-50-30	MAC-Touch1	Adv Pref FC	Mito	Stroop_3_2_Mito3sec#2.csv	3	290	2	None	3000	White	Scattered	121_square_yellow_blue.jpg	122_square_yellow_yellow.jpg	19	24	121_square_yellow_blue.jpg	Blue	1	Incongruent	2067	NA	121_square_yellow_blue.jpg 122_square_yellow_yellow.jpg	7	N	3.31534
Macaque	Monkey	Blue	43615	11-50-35	MAC-Touch1	Adv Pref FC	Mito	Stroop_3_2_Mito3sec#2.csv	4	290	2	None	3000	White	Scattered	119_square_blue_blue.jpg	120_square_blue_yellow.jpg	14	22	119_square_blue_blue.jpg	Blue	1	Congruent	4123	NA	119_square_blue_blue.jpg 120_square_blue_yellow.jpg	7	N	3.61521
Macaque	Monkey	Blue	43615	11-50-42	MAC-Touch1	Adv Pref FC	Mito	Stroop_3_2_Mito3sec#2.csv	5	290	2	None	3000	White	Scattered	113_heart_yellow_blue.jpg	114_heart_yellow_yellow.jpg	14	17	113_heart_yellow_blue.jpg	Blue	1	Incongruent	1518	NA	113_heart_yellow_blue.jpg 114_heart_yellow_yellow.jpg	7	N	3.18127
Macaque	Monkey	Blue	43615	11-50-47	MAC-Touch1	Adv Pref FC	Mito	Stroop_3_2_Mito3sec#2.csv	6	290	2	None	3000	White	Scattered	117_shovel_blue.jpg	118_shovel_yellow.jpg	15	21	117_shovel_blue.jpg	Blue	1	Control	4167	NA	117_shovel_blue.jpg 118_shovel_yellow.jpg	7	N	3.61982
Macaque	Monkey	Blue	43615	11-50-54	MAC-Touch1	Adv Pref FC	Mito	Stroop_3_2_Mito3sec#2.csv	7	290	2	None	3000	White	Scattered	103_cross_blue_blue.JPG	104_cross_blue_yellow.JPG	17	23	103_cross_blue_blue.JPG	Blue	1	Congruent	3092	NA	103_cross_blue_blue.JPG 104_cross_blue_yellow.JPG	7	N	3.49024
Macaque	Monkey	Blue	43615	11-51-00	MAC-Touch1	Adv Pref FC	Mito	Stroop_3_2_Mito3sec#2.csv	8	290	2	None	3000	White	Scattered	107_fidget_spinner_blue.jpg	108_fidget_spinner_yellow.jpg	23	21	107_fidget_spinner_blue.jpg	Blue	1	Control	3356	NA	107_fidget_spinner_blue.jpg 108_fidget_spinner_yellow.jpg	7	N	3.52582
Macaque	Monkey	Blue	43615	11-51-07	MAC-Touch1	Adv Pref FC	Mito	Stroop_3_2_Mito3sec#2.csv	9	290	2	None	3000	White	Scattered	123_star_blue_blue.jpg	124_star_blue_yellow.jpg	23	16	123_star_blue_blue.jpg	Blue	1	Congruent	3146	NA	123_star_blue_blue.jpg 124_star_blue_yellow.jpg	7	N	3.49776
Macaque	Monkey	Blue	43615	11-51-13	MAC-Touch1	Adv Pref FC	Mito	Stroop_3_2_Mito3sec#2.csv	10	290	2	None	3000	White	Scattered	113_heart_yellow_blue.jpg	114_heart_yellow_yellow.jpg	16	14	113_heart_yellow_blue.jpg	Blue	1	Incongruent	2351	NA	113_heart_yellow_blue.jpg 114_heart_yellow_yellow.jpg	7	N	3.37125
Macaque	Monkey	Blue	43615	11-51-18	MAC-Touch1	Adv Pref FC	Mito	Stroop_3_2_Mito3sec#2.csv	11	290	2	None	3000	White	Scattered	119_square_blue_blue.jpg	120_square_blue_yellow.jpg	15	24	120_square_blue_yellow.jpg	Yellow	0	Congruent	4306	NA	119_square_blue_blue.jpg 120_square_blue_yellow.jpg	7	N	3.63407
Macaque	Monkey	Blue	43615	11-51-26	MAC-Touch1	Adv Pref FC	Mito	Stroop_3_2_Mito3sec#2.csv	12	290	2	None	3000	White	Scattered	117_shovel_blue.jpg	118_shovel_yellow.jpg	11	21	117_shovel_blue.jpg	Blue	1	Control	7259	NA	117_shovel_blue.jpg 118_shovel_yellow.jpg	7	N	3.86088
Macaque	Monkey	Blue	43615	11-51-36	MAC-Touch1	Adv Pref FC	Mito	Stroop_3_2_Mito3sec#2.csv	13	290	2	None	3000	White	Scattered	105_cross_yellow_blue.jpg	106_cross_yellow_yellow.jpg	24	21	105_cross_yellow_blue.jpg	Blue	1	Incongruent	3097	NA	105_cross_yellow_blue.jpg 106_cross_yellow_yellow.jpg	7	N	3.49094
Macaque	Monkey	Blue	43615	11-51-42	MAC-Touch1	Adv Pref FC	Mito	Stroop_3_2_Mito3sec#2.csv	14	290	2	None	3000	White	Scattered	123_star_blue_blue.jpg	124_star_blue_yellow.jpg	21	12	124_star_blue_yellow.jpg	Yellow	0	Congruent	3274	NA	123_star_blue_blue.jpg 124_star_blue_yellow.jpg	7	N	3.51508
Macaque	Monkey	Blue	43615	11-51-49	MAC-Touch1	Adv Pref FC	Mito	Stroop_3_2_Mito3sec#2.csv	15	290	2	None	3000	White	Scattered	111_heart_blue_blue.jpg	112_heart_blue_yellow.jpg	12	18	112_heart_blue_yellow.jpg	Yellow	0	Congruent	1292	NA	111_heart_blue_blue.jpg 112_heart_blue_yellow.jpg	7	N	3.11126
Macaque	Monkey	Blue	43615	11-51-53	MAC-Touch1	Adv Pref FC	Mito	Stroop_3_2_Mito3sec#2.csv	16	290	2	None	3000	White	Scattered	101_bicycle_blue.JPG	102_bicycle_yellow.JPG	13	25	101_bicycle_blue.JPG	Blue	1	Control	3176	NA	101_bicycle_blue.JPG 102_bicycle_yellow.JPG	7	N	3.50188
Macaque	Monkey	Blue	43615	11-51-59	MAC-Touch1	Adv Pref FC	Mito	Stroop_3_2_Mito3sec#2.csv	17	290	2	None	3000	White	Scattered	103_cross_blue_blue.JPG	104_cross_blue_yellow.JPG	20	21	103_cross_blue_blue.JPG	Blue	1	Congruent	2092	NA	103_cross_blue_blue.JPG 104_cross_blue_yellow.JPG	7	N	3.32056
Macaque	Monkey	Blue	43626	44919	MAC-Touch1	Adv Pref FC	Mito	Stroop_3_2_4.csv	1	290	2	None	3000	White	Scattered	123_star_blue_blue.jpg	124_star_blue_yellow.jpg	25	23	123_star_blue_blue.jpg	Blue	1	Congruent	1511	NA	123_star_blue_blue.jpg 124_star_blue_yellow.jpg	8	N	3.17926
Macaque	Monkey	Blue	43626	46745	MAC-Touch1	Adv Pref FC	Mito	Stroop_3_2_4.csv	2	290	2	None	3000	White	Scattered	115_mug_blue.jpg	116_mug_yellow.jpg	23	19	115_mug_blue.jpg	Blue	1	Control	5138	NA	115_mug_blue.jpg 116_mug_yellow.jpg	8	N	3.71079
Macaque	Monkey	Blue	43626	13142	MAC-Touch1	Adv Pref FC	Mito	Stroop_3_2_4.csv	3	290	2	None	3000	White	Scattered	105_cross_yellow_blue.jpg	106_cross_yellow_yellow.jpg	17	11	106_cross_yellow_yellow.jpg	Yellow	0	Incongruent	5597	NA	105_cross_yellow_blue.jpg 106_cross_yellow_yellow.jpg	8	N	3.74796
Macaque	Monkey	Blue	43626	16064	MAC-Touch1	Adv Pref FC	Mito	Stroop_3_2_4.csv	4	290	2	None	3000	White	Scattered	109_fork_blue.jpg	110_fork_yellow.jpg	18	14	109_fork_blue.jpg	Blue	1	Control	3829	NA	109_fork_blue.jpg 110_fork_yellow.jpg	8	N	3.58309
Macaque	Monkey	Blue	43626	18621	MAC-Touch1	Adv Pref FC	Mito	Stroop_3_2_4.csv	5	290	2	None	3000	White	Scattered	123_star_blue_blue.jpg	124_star_blue_yellow.jpg	15	18	123_star_blue_blue.jpg	Blue	1	Congruent	2970	NA	123_star_blue_blue.jpg 124_star_blue_yellow.jpg	8	N	3.47276
Macaque	Monkey	Blue	43626	21178	MAC-Touch1	Adv Pref FC	Mito	Stroop_3_2_4.csv	6	290	2	None	3000	White	Scattered	113_heart_yellow_blue.jpg	114_heart_yellow_yellow.jpg	18	20	113_heart_yellow_blue.jpg	Blue	1	Incongruent	9342	NA	113_heart_yellow_blue.jpg 114_heart_yellow_yellow.jpg	8	Y	3.97044
Macaque	Monkey	Blue	43626	20814	MAC-Touch1	Adv Pref FC	Mito	Stroop_3_2_4.csv	7	290	2	None	3000	White	Scattered	117_shovel_blue.jpg	118_shovel_yellow.jpg	25	11	117_shovel_blue.jpg	Blue	1	Control	5318	NA	117_shovel_blue.jpg 118_shovel_yellow.jpg	8	N	3.72575
Macaque	Monkey	Blue	43626	38347	MAC-Touch1	Adv Pref FC	Mito	Stroop_3_2_4.csv	8	290	2	None	3000	White	Scattered	125_star_yellow_blue.jpg	126_star_yellow_yellow.jpg	15	12	125_star_yellow_blue.jpg	Blue	1	Incongruent	2353	NA	125_star_yellow_blue.jpg 126_star_yellow_yellow.jpg	8	N	3.37162
Macaque	Monkey	Blue	43626	40538	MAC-Touch1	Adv Pref FC	Mito	Stroop_3_2_4.csv	9	290	2	None	3000	White	Scattered	109_fork_blue.jpg	110_fork_yellow.jpg	22	23	109_fork_blue.jpg	Blue	1	Control	1391	NA	109_fork_blue.jpg 110_fork_yellow.jpg	8	N	3.14333
Macaque	Monkey	Blue	43626	41999	MAC-Touch1	Adv Pref FC	Mito	Stroop_3_2_4.csv	10	290	2	None	3000	White	Scattered	113_heart_yellow_blue.jpg	114_heart_yellow_yellow.jpg	18	23	114_heart_yellow_yellow.jpg	Yellow	0	Incongruent	3052	NA	113_heart_yellow_blue.jpg 114_heart_yellow_yellow.jpg	8	N	3.48458
Macaque	Monkey	Blue	43626	44556	MAC-Touch1	Adv Pref FC	Mito	Stroop_3_2_4.csv	11	290	2	None	3000	White	Scattered	111_heart_blue_blue.jpg	112_heart_blue_yellow.jpg	16	19	111_heart_blue_blue.jpg	Blue	1	Congruent	2624	NA	111_heart_blue_blue.jpg 112_heart_blue_yellow.jpg	8	N	3.41896
Macaque	Monkey	Blue	43626	46382	MAC-Touch1	Adv Pref FC	Mito	Stroop_3_2_4.csv	12	290	2	None	3000	White	Scattered	119_square_blue_blue.jpg	120_square_blue_yellow.jpg	24	17	119_square_blue_blue.jpg	Blue	1	Congruent	1736	NA	119_square_blue_blue.jpg 120_square_blue_yellow.jpg	8	N	3.23955
Macaque	Monkey	Blue	43626	11683	MAC-Touch1	Adv Pref FC	Mito	Stroop_3_2_4.csv	13	290	2	None	3000	White	Scattered	105_cross_yellow_blue.jpg	106_cross_yellow_yellow.jpg	12	13	105_cross_yellow_blue.jpg	Blue	1	Incongruent	2142	NA	105_cross_yellow_blue.jpg 106_cross_yellow_yellow.jpg	8	N	3.33082
Macaque	Monkey	Blue	43626	13510	MAC-Touch1	Adv Pref FC	Mito	Stroop_3_2_4.csv	14	290	2	None	3000	White	Scattered	101_bicycle_blue.JPG	102_bicycle_yellow.JPG	15	14	101_bicycle_blue.JPG	Blue	1	Control	4310	NA	101_bicycle_blue.JPG 102_bicycle_yellow.JPG	8	N	3.63448
Macaque	Monkey	Blue	43626	16432	MAC-Touch1	Adv Pref FC	Mito	Stroop_3_2_4.csv	15	290	2	None	3000	White	Scattered	119_square_blue_blue.jpg	120_square_blue_yellow.jpg	18	21	119_square_blue_blue.jpg	Blue	1	Congruent	1156	NA	119_square_blue_blue.jpg 120_square_blue_yellow.jpg	8	N	3.06296
Macaque	Monkey	Blue	43626	17893	MAC-Touch1	Adv Pref FC	Mito	Stroop_3_2_4.csv	16	290	2	None	3000	White	Scattered	105_cross_yellow_blue.jpg	106_cross_yellow_yellow.jpg	21	18	105_cross_yellow_blue.jpg	Blue	1	Incongruent	3876	NA	105_cross_yellow_blue.jpg 106_cross_yellow_yellow.jpg	8	N	3.58838
Macaque	Monkey	Blue	43626	20449	MAC-Touch1	Adv Pref FC	Mito	Stroop_3_2_4.csv	17	290	2	None	3000	White	Scattered	103_cross_blue_blue.JPG	104_cross_blue_yellow.JPG	11	12	103_cross_blue_blue.JPG	Blue	1	Congruent	2843	NA	103_cross_blue_blue.JPG 104_cross_blue_yellow.JPG	8	N	3.45378
Macaque	Monkey	Blue	43626	37252	MAC-Touch1	Adv Pref FC	Mito	Stroop_3_2_4.csv	18	290	2	None	3000	White	Scattered	115_mug_blue.jpg	116_mug_yellow.jpg	12	20	115_mug_blue.jpg	Blue	1	Control	2462	NA	115_mug_blue.jpg 116_mug_yellow.jpg	8	N	3.39129
Macaque	Monkey	Blue	43626	39443	MAC-Touch1	Adv Pref FC	Mito	Stroop_3_2_4.csv	19	290	2	None	3000	White	Scattered	125_star_yellow_blue.jpg	126_star_yellow_yellow.jpg	25	14	125_star_yellow_blue.jpg	Blue	1	Incongruent	1761	NA	125_star_yellow_blue.jpg 126_star_yellow_yellow.jpg	8	N	3.24576
Macaque	Monkey	Blue	43626	40904	MAC-Touch1	Adv Pref FC	Mito	Stroop_3_2_4.csv	20	290	2	None	3000	White	Scattered	107_fidget_spinner_blue.jpg	108_fidget_spinner_yellow.jpg	20	15	107_fidget_spinner_blue.jpg	Blue	1	Control	2811	NA	107_fidget_spinner_blue.jpg 108_fidget_spinner_yellow.jpg	8	N	3.44886
Macaque	Monkey	Blue	43626	43096	MAC-Touch1	Adv Pref FC	Mito	Stroop_3_2_4.csv	21	290	2	None	3000	White	Scattered	123_star_blue_blue.jpg	124_star_blue_yellow.jpg	24	16	123_star_blue_blue.jpg	Blue	1	Congruent	3329	NA	123_star_blue_blue.jpg 124_star_blue_yellow.jpg	8	N	3.52231
Macaque	Monkey	Blue	43626	45653	MAC-Touch1	Adv Pref FC	Mito	Stroop_3_2_4.csv	22	290	2	None	3000	White	Scattered	101_bicycle_blue.JPG	102_bicycle_yellow.JPG	17	20	101_bicycle_blue.JPG	Blue	1	Control	1995	NA	101_bicycle_blue.JPG 102_bicycle_yellow.JPG	8	N	3.29994
Macaque	Monkey	Blue	43626	47479	MAC-Touch1	Adv Pref FC	Mito	Stroop_3_2_4.csv	23	290	2	None	3000	White	Scattered	121_square_yellow_blue.jpg	122_square_yellow_yellow.jpg	22	17	122_square_yellow_yellow.jpg	Yellow	0	Incongruent	1697	NA	121_square_yellow_blue.jpg 122_square_yellow_yellow.jpg	8	N	3.22968
Macaque	Monkey	Blue	43626	12780	MAC-Touch1	Adv Pref FC	Mito	Stroop_3_2_4.csv	24	290	2	None	3000	White	Scattered	111_heart_blue_blue.jpg	112_heart_blue_yellow.jpg	18	25	111_heart_blue_blue.jpg	Blue	1	Congruent	2534	NA	111_heart_blue_blue.jpg 112_heart_blue_yellow.jpg	8	N	3.40381
Macaque	Monkey	Blue	43626	14606	MAC-Touch1	Adv Pref FC	Mito	Stroop_3_2_4.csv	25	290	2	None	3000	White	Scattered	107_fidget_spinner_blue.jpg	108_fidget_spinner_yellow.jpg	23	16	107_fidget_spinner_blue.jpg	Blue	1	Control	3622	NA	107_fidget_spinner_blue.jpg 108_fidget_spinner_yellow.jpg	8	N	3.55895
Macaque	Monkey	Blue	43626	17163	MAC-Touch1	Adv Pref FC	Mito	Stroop_3_2_4.csv	26	290	2	None	3000	White	Scattered	103_cross_blue_blue.JPG	104_cross_blue_yellow.JPG	19	25	103_cross_blue_blue.JPG	Blue	1	Congruent	1074	NA	103_cross_blue_blue.JPG 104_cross_blue_yellow.JPG	8	N	3.031
Macaque	Monkey	Blue	43626	18624	MAC-Touch1	Adv Pref FC	Mito	Stroop_3_2_4.csv	27	290	2	None	3000	White	Scattered	125_star_yellow_blue.jpg	126_star_yellow_yellow.jpg	22	19	125_star_yellow_blue.jpg	Blue	1	Incongruent	2641	NA	125_star_yellow_blue.jpg 126_star_yellow_yellow.jpg	8	N	3.42177
Macaque	Monkey	Blue	43626	20816	MAC-Touch1	Adv Pref FC	Mito	Stroop_3_2_4.csv	28	290	2	None	3000	White	Scattered	117_shovel_blue.jpg	118_shovel_yellow.jpg	22	17	117_shovel_blue.jpg	Blue	1	Control	395	NA	117_shovel_blue.jpg 118_shovel_yellow.jpg	8	N	2.5966
Macaque	Monkey	Blue	43626	36888	MAC-Touch1	Adv Pref FC	Mito	Stroop_3_2_4.csv	29	290	2	None	3000	White	Scattered	121_square_yellow_blue.jpg	122_square_yellow_yellow.jpg	22	17	122_square_yellow_yellow.jpg	Yellow	0	Incongruent	1330	NA	121_square_yellow_blue.jpg 122_square_yellow_yellow.jpg	8	N	3.12385
Macaque	Monkey	Blue	43626	38349	MAC-Touch1	Adv Pref FC	Mito	Stroop_3_2_4.csv	30	290	2	None	3000	White	Scattered	103_cross_blue_blue.JPG	104_cross_blue_yellow.JPG	20	25	103_cross_blue_blue.JPG	Blue	1	Congruent	2016	NA	103_cross_blue_blue.JPG 104_cross_blue_yellow.JPG	8	N	3.30449
Macaque	Monkey	Blue	43655	11-55-40	MAC-Touch1	Adv Pref FC	Mito	Stroop_3_2_Mito3sec#3.csv	1	290	2	None	3000	White	Scattered	105_cross_yellow_blue.jpg	106_cross_yellow_yellow.jpg	12	16	105_cross_yellow_blue.jpg	Blue	1	Incongruent	19715	NA	105_cross_yellow_blue.jpg 106_cross_yellow_yellow.jpg	9	Y	4.2948
Macaque	Monkey	Blue	43655	11-56-02	MAC-Touch1	Adv Pref FC	Mito	Stroop_3_2_Mito3sec#3.csv	2	290	2	None	3000	White	Scattered	103_cross_blue_blue.JPG	104_cross_blue_yellow.JPG	12	20	103_cross_blue_blue.JPG	Blue	1	Congruent	5376	NA	103_cross_blue_blue.JPG 104_cross_blue_yellow.JPG	9	N	3.73046
Macaque	Monkey	Blue	43655	11-56-11	MAC-Touch1	Adv Pref FC	Mito	Stroop_3_2_Mito3sec#3.csv	3	290	2	None	3000	White	Scattered	115_mug_blue.jpg	116_mug_yellow.jpg	24	18	115_mug_blue.jpg	Blue	1	Control	1610	NA	115_mug_blue.jpg 116_mug_yellow.jpg	9	N	3.20683
Macaque	Monkey	Blue	43662	39772	MAC-Touch1	Adv Pref FC	Mito	Stroop_3_2_Mito3sec#4.csv	1	290	2	None	3000	White	Scattered	125_star_yellow_blue.jpg	126_star_yellow_yellow.jpg	15	16	125_star_yellow_blue.jpg	Blue	1	Incongruent	1645	NA	125_star_yellow_blue.jpg 126_star_yellow_yellow.jpg	10	N	3.21617
Macaque	Monkey	Blue	43662	41598	MAC-Touch1	Adv Pref FC	Mito	Stroop_3_2_Mito3sec#4.csv	2	290	2	None	3000	White	Scattered	107_fidget_spinner_blue.jpg	108_fidget_spinner_yellow.jpg	13	16	107_fidget_spinner_blue.jpg	Blue	1	Control	5977	NA	107_fidget_spinner_blue.jpg 108_fidget_spinner_yellow.jpg	10	N	3.77648
Macaque	Monkey	Blue	43662	44885	MAC-Touch1	Adv Pref FC	Mito	Stroop_3_2_Mito3sec#4.csv	3	290	2	None	3000	White	Scattered	123_star_blue_blue.jpg	124_star_blue_yellow.jpg	20	18	124_star_blue_yellow.jpg	Yellow	0	Congruent	2298	NA	123_star_blue_blue.jpg 124_star_blue_yellow.jpg	10	N	3.36135
Macaque	Monkey	Blue	43662	46711	MAC-Touch1	Adv Pref FC	Mito	Stroop_3_2_Mito3sec#4.csv	4	290	2	None	3000	White	Scattered	101_bicycle_blue.JPG	102_bicycle_yellow.JPG	21	18	102_bicycle_yellow.JPG	Yellow	0	Control	758	NA	101_bicycle_blue.JPG 102_bicycle_yellow.JPG	10	N	2.87967
Macaque	Monkey	Blue	43662	11647	MAC-Touch1	Adv Pref FC	Mito	Stroop_3_2_Mito3sec#4.csv	5	290	2	None	3000	White	Scattered	121_square_yellow_blue.jpg	122_square_yellow_yellow.jpg	12	16	121_square_yellow_blue.jpg	Blue	1	Incongruent	2155	NA	121_square_yellow_blue.jpg 122_square_yellow_yellow.jpg	10	N	3.33345
Macaque	Monkey	Blue	43662	13839	MAC-Touch1	Adv Pref FC	Mito	Stroop_3_2_Mito3sec#4.csv	6	290	2	None	3000	White	Scattered	111_heart_blue_blue.jpg	112_heart_blue_yellow.jpg	23	18	112_heart_blue_yellow.jpg	Yellow	0	Congruent	3093	NA	111_heart_blue_blue.jpg 112_heart_blue_yellow.jpg	10	N	3.49038
Macaque	Monkey	Blue	43662	16030	MAC-Touch1	Adv Pref FC	Mito	Stroop_3_2_Mito3sec#4.csv	7	290	2	None	3000	White	Scattered	107_fidget_spinner_blue.jpg	108_fidget_spinner_yellow.jpg	11	23	107_fidget_spinner_blue.jpg	Blue	1	Control	2451	NA	107_fidget_spinner_blue.jpg 108_fidget_spinner_yellow.jpg	10	N	3.38934
Macaque	Monkey	Blue	43662	17857	MAC-Touch1	Adv Pref FC	Mito	Stroop_3_2_Mito3sec#4.csv	8	290	2	None	3000	White	Scattered	103_cross_blue_blue.JPG	104_cross_blue_yellow.JPG	20	21	103_cross_blue_blue.JPG	Blue	1	Congruent	1874	NA	103_cross_blue_blue.JPG 104_cross_blue_yellow.JPG	10	N	3.27277
Macaque	Monkey	Blue	43662	19683	MAC-Touch1	Adv Pref FC	Mito	Stroop_3_2_Mito3sec#4.csv	9	290	2	None	3000	White	Scattered	125_star_yellow_blue.jpg	126_star_yellow_yellow.jpg	15	22	125_star_yellow_blue.jpg	Blue	1	Incongruent	2665	NA	125_star_yellow_blue.jpg 126_star_yellow_yellow.jpg	10	N	3.4257
Macaque	Monkey	Blue	43662	21874	MAC-Touch1	Adv Pref FC	Mito	Stroop_3_2_Mito3sec#4.csv	10	290	2	None	3000	White	Scattered	117_shovel_blue.jpg	118_shovel_yellow.jpg	22	15	118_shovel_yellow.jpg	Yellow	0	Control	3233	NA	117_shovel_blue.jpg 118_shovel_yellow.jpg	10	N	3.50961
Macaque	Monkey	Blue	43662	39042	MAC-Touch1	Adv Pref FC	Mito	Stroop_3_2_Mito3sec#4.csv	11	290	2	None	3000	White	Scattered	121_square_yellow_blue.jpg	122_square_yellow_yellow.jpg	17	23	121_square_yellow_blue.jpg	Blue	1	Incongruent	1207	NA	121_square_yellow_blue.jpg 122_square_yellow_yellow.jpg	10	N	3.08171
Macaque	Monkey	Blue	43662	40503	MAC-Touch1	Adv Pref FC	Mito	Stroop_3_2_Mito3sec#4.csv	12	290	2	None	3000	White	Scattered	103_cross_blue_blue.JPG	104_cross_blue_yellow.JPG	12	14	103_cross_blue_blue.JPG	Blue	1	Congruent	3389	NA	103_cross_blue_blue.JPG 104_cross_blue_yellow.JPG	10	N	3.53007
Macaque	Monkey	Blue	43662	42695	MAC-Touch1	Adv Pref FC	Mito	Stroop_3_2_Mito3sec#4.csv	13	290	2	None	3000	White	Scattered	117_shovel_blue.jpg	118_shovel_yellow.jpg	24	11	117_shovel_blue.jpg	Blue	1	Control	580	NA	117_shovel_blue.jpg 118_shovel_yellow.jpg	10	N	2.76343
Macaque	Monkey	Blue	43662	44156	MAC-Touch1	Adv Pref FC	Mito	Stroop_3_2_Mito3sec#4.csv	14	290	2	None	3000	White	Scattered	125_star_yellow_blue.jpg	126_star_yellow_yellow.jpg	23	19	125_star_yellow_blue.jpg	Blue	1	Incongruent	3062	NA	125_star_yellow_blue.jpg 126_star_yellow_yellow.jpg	10	N	3.48601
Macaque	Monkey	Blue	43662	46347	MAC-Touch1	Adv Pref FC	Mito	Stroop_3_2_Mito3sec#4.csv	15	290	2	None	3000	White	Scattered	101_bicycle_blue.JPG	102_bicycle_yellow.JPG	17	23	101_bicycle_blue.JPG	Blue	1	Control	1187	NA	101_bicycle_blue.JPG 102_bicycle_yellow.JPG	10	N	3.07445
Macaque	Monkey	Blue	43662	11283	MAC-Touch1	Adv Pref FC	Mito	Stroop_3_2_Mito3sec#4.csv	16	290	2	None	3000	White	Scattered	113_heart_yellow_blue.jpg	114_heart_yellow_yellow.jpg	19	21	113_heart_yellow_blue.jpg	Blue	1	Incongruent	2782	NA	113_heart_yellow_blue.jpg 114_heart_yellow_yellow.jpg	10	N	3.44436
Macaque	Monkey	Blue	43662	13475	MAC-Touch1	Adv Pref FC	Mito	Stroop_3_2_Mito3sec#4.csv	17	290	2	None	3000	White	Scattered	119_square_blue_blue.jpg	120_square_blue_yellow.jpg	24	14	119_square_blue_blue.jpg	Blue	1	Congruent	2966	NA	119_square_blue_blue.jpg 120_square_blue_yellow.jpg	10	N	3.47217
Macaque	Monkey	Blue	43662	15666	MAC-Touch1	Adv Pref FC	Mito	Stroop_3_2_Mito3sec#4.csv	18	290	2	None	3000	White	Scattered	115_mug_blue.jpg	116_mug_yellow.jpg	16	14	115_mug_blue.jpg	Blue	1	Control	2363	NA	115_mug_blue.jpg 116_mug_yellow.jpg	10	N	3.37346
Macaque	Monkey	Blue	43662	20049	MAC-Touch1	Adv Pref FC	Mito	Stroop_3_2_Mito3sec#4.csv	20	290	2	None	3000	White	Scattered	105_cross_yellow_blue.jpg	106_cross_yellow_yellow.jpg	25	23	105_cross_yellow_blue.jpg	Blue	1	Incongruent	2717	NA	105_cross_yellow_blue.jpg 106_cross_yellow_yellow.jpg	10	N	3.43409
Macaque	Monkey	Blue	43662	36852	MAC-Touch1	Adv Pref FC	Mito	Stroop_3_2_Mito3sec#4.csv	21	290	2	None	3000	White	Scattered	107_fidget_spinner_blue.jpg	108_fidget_spinner_yellow.jpg	21	25	107_fidget_spinner_blue.jpg	Blue	1	Control	3034	NA	107_fidget_spinner_blue.jpg 108_fidget_spinner_yellow.jpg	10	N	3.48202
Macaque	Monkey	Blue	43662	39043	MAC-Touch1	Adv Pref FC	Mito	Stroop_3_2_Mito3sec#4.csv	22	290	2	None	3000	White	Scattered	119_square_blue_blue.jpg	120_square_blue_yellow.jpg	17	25	119_square_blue_blue.jpg	Blue	1	Congruent	1289	NA	119_square_blue_blue.jpg 120_square_blue_yellow.jpg	10	N	3.11025
Macaque	Monkey	Blue	43662	40504	MAC-Touch1	Adv Pref FC	Mito	Stroop_3_2_Mito3sec#4.csv	23	290	2	None	3000	White	Scattered	115_mug_blue.jpg	116_mug_yellow.jpg	20	25	115_mug_blue.jpg	Blue	1	Control	2781	NA	115_mug_blue.jpg 116_mug_yellow.jpg	10	N	3.4442
Macaque	Monkey	Blue	43662	41236	MAC-Touch1	Adv Pref FC	Mito	Stroop_3_2_4.csv	1	290	2	None	3000	White	Scattered	123_star_blue_blue.jpg	124_star_blue_yellow.jpg	13	15	123_star_blue_blue.jpg	Blue	1	Congruent	5481	NA	123_star_blue_blue.jpg 124_star_blue_yellow.jpg	10	N	3.73886
Macaque	Monkey	Yellow	43585	14943	MAC-Touch1	Adv Pref FC	Miyagi	Stroop_3_1_1.csv	1	290	2	None	3000	White	Scattered	115_mug_blue.jpg	116_mug_yellow.jpg	23	19	116_mug_yellow.jpg	Yellow	1	Control	1385	NA	115_mug_blue.jpg 116_mug_yellow.jpg	1	N	3.14145
Macaque	Monkey	Yellow	43585	16769	MAC-Touch1	Adv Pref FC	Miyagi	Stroop_3_1_1.csv	2	290	2	None	3000	White	Scattered	125_star_yellow_blue.jpg	126_star_yellow_yellow.jpg	19	17	125_star_yellow_blue.jpg	Blue	0	Congruent	3989	NA	125_star_yellow_blue.jpg 126_star_yellow_yellow.jpg	1	N	3.60086
Macaque	Monkey	Yellow	43585	19326	MAC-Touch1	Adv Pref FC	Miyagi	Stroop_3_1_1.csv	3	290	2	None	3000	White	Scattered	109_fork_blue.jpg	110_fork_yellow.jpg	14	11	109_fork_blue.jpg	Blue	0	Control	1376	NA	109_fork_blue.jpg 110_fork_yellow.jpg	1	N	3.13862
Macaque	Monkey	Yellow	43585	21152	MAC-Touch1	Adv Pref FC	Miyagi	Stroop_3_1_1.csv	4	290	2	None	3000	White	Scattered	123_star_blue_blue.jpg	124_star_blue_yellow.jpg	16	17	123_star_blue_blue.jpg	Blue	0	Incongruent	1468	NA	123_star_blue_blue.jpg 124_star_blue_yellow.jpg	1	N	3.16673
Macaque	Monkey	Yellow	43585	37224	MAC-Touch1	Adv Pref FC	Miyagi	Stroop_3_1_1.csv	5	290	2	None	3000	White	Scattered	105_cross_yellow_blue.jpg	106_cross_yellow_yellow.jpg	16	21	106_cross_yellow_yellow.jpg	Yellow	1	Congruent	15628	NA	105_cross_yellow_blue.jpg 106_cross_yellow_yellow.jpg	1	Y	4.1939
Macaque	Monkey	Yellow	43585	44164	MAC-Touch1	Adv Pref FC	Miyagi	Stroop_3_1_1.csv	6	290	2	None	3000	White	Scattered	125_star_yellow_blue.jpg	126_star_yellow_yellow.jpg	19	13	126_star_yellow_yellow.jpg	Yellow	1	Congruent	10376	NA	125_star_yellow_blue.jpg 126_star_yellow_yellow.jpg	1	Y	4.01603
Macaque	Monkey	Yellow	43585	12387	MAC-Touch1	Adv Pref FC	Miyagi	Stroop_3_1_1.csv	7	290	2	None	3000	White	Scattered	115_mug_blue.jpg	116_mug_yellow.jpg	24	23	115_mug_blue.jpg	Blue	0	Control	3434	NA	115_mug_blue.jpg 116_mug_yellow.jpg	1	N	3.5358
Macaque	Monkey	Yellow	43585	14944	MAC-Touch1	Adv Pref FC	Miyagi	Stroop_3_1_1.csv	8	290	2	None	3000	White	Scattered	111_heart_blue_blue.jpg	112_heart_blue_yellow.jpg	23	21	112_heart_blue_yellow.jpg	Yellow	1	Incongruent	1531	NA	111_heart_blue_blue.jpg 112_heart_blue_yellow.jpg	1	N	3.18498
Macaque	Monkey	Yellow	43585	16405	MAC-Touch1	Adv Pref FC	Miyagi	Stroop_3_1_1.csv	9	290	2	None	3000	White	Scattered	121_square_yellow_blue.jpg	122_square_yellow_yellow.jpg	15	21	122_square_yellow_yellow.jpg	Yellow	1	Congruent	1724	NA	121_square_yellow_blue.jpg 122_square_yellow_yellow.jpg	1	N	3.23654
Macaque	Monkey	Yellow	43585	18231	MAC-Touch1	Adv Pref FC	Miyagi	Stroop_3_1_1.csv	10	290	2	None	3000	White	Scattered	101_bicycle_blue.JPG	102_bicycle_yellow.JPG	21	15	102_bicycle_yellow.JPG	Yellow	1	Control	3378	NA	101_bicycle_blue.JPG 102_bicycle_yellow.JPG	1	N	3.52866
Macaque	Monkey	Yellow	43585	20788	MAC-Touch1	Adv Pref FC	Miyagi	Stroop_3_1_1.csv	11	290	2	None	3000	White	Scattered	105_cross_yellow_blue.jpg	106_cross_yellow_yellow.jpg	11	13	106_cross_yellow_yellow.jpg	Yellow	1	Congruent	5986	NA	105_cross_yellow_blue.jpg 106_cross_yellow_yellow.jpg	1	Y	3.77714
Macaque	Monkey	Yellow	43585	38686	MAC-Touch1	Adv Pref FC	Miyagi	Stroop_3_1_1.csv	12	290	2	None	3000	White	Scattered	107_fidget_spinner_blue.jpg	108_fidget_spinner_yellow.jpg	11	19	108_fidget_spinner_yellow.jpg	Yellow	1	Control	5519	NA	107_fidget_spinner_blue.jpg 108_fidget_spinner_yellow.jpg	1	N	3.74186
Macaque	Monkey	Yellow	43585	41973	MAC-Touch1	Adv Pref FC	Miyagi	Stroop_3_1_1.csv	13	290	2	None	3000	White	Scattered	125_star_yellow_blue.jpg	126_star_yellow_yellow.jpg	19	16	125_star_yellow_blue.jpg	Blue	0	Congruent	3409	NA	125_star_yellow_blue.jpg 126_star_yellow_yellow.jpg	1	N	3.53263
Macaque	Monkey	Yellow	43585	44165	MAC-Touch1	Adv Pref FC	Miyagi	Stroop_3_1_1.csv	14	290	2	None	3000	White	Scattered	103_cross_blue_blue.JPG	104_cross_blue_yellow.JPG	22	13	104_cross_blue_yellow.JPG	Yellow	1	Incongruent	1380	NA	103_cross_blue_blue.JPG 104_cross_blue_yellow.JPG	1	N	3.13988
Macaque	Monkey	Yellow	43585	45991	MAC-Touch1	Adv Pref FC	Miyagi	Stroop_3_1_1.csv	15	290	2	None	3000	White	Scattered	109_fork_blue.jpg	110_fork_yellow.jpg	21	13	110_fork_yellow.jpg	Yellow	1	Control	6283	NA	109_fork_blue.jpg 110_fork_yellow.jpg	1	Y	3.79817
Macaque	Monkey	Yellow	43585	12753	MAC-Touch1	Adv Pref FC	Miyagi	Stroop_3_1_1.csv	16	290	2	None	3000	White	Scattered	121_square_yellow_blue.jpg	122_square_yellow_yellow.jpg	22	13	122_square_yellow_yellow.jpg	Yellow	1	Congruent	2310	NA	121_square_yellow_blue.jpg 122_square_yellow_yellow.jpg	1	N	3.36361
Macaque	Monkey	Yellow	43585	14579	MAC-Touch1	Adv Pref FC	Miyagi	Stroop_3_1_1.csv	17	290	2	None	3000	White	Scattered	119_square_blue_blue.jpg	120_square_blue_yellow.jpg	14	21	119_square_blue_blue.jpg	Blue	0	Incongruent	2848	NA	119_square_blue_blue.jpg 120_square_blue_yellow.jpg	1	N	3.45454
Macaque	Monkey	Yellow	43585	16771	MAC-Touch1	Adv Pref FC	Miyagi	Stroop_3_1_1.csv	18	290	2	None	3000	White	Scattered	113_heart_yellow_blue.jpg	114_heart_yellow_yellow.jpg	23	13	113_heart_yellow_blue.jpg	Blue	0	Congruent	1391	NA	113_heart_yellow_blue.jpg 114_heart_yellow_yellow.jpg	1	N	3.14333
Macaque	Monkey	Yellow	43585	18597	MAC-Touch1	Adv Pref FC	Miyagi	Stroop_3_1_1.csv	19	290	2	None	3000	White	Scattered	117_shovel_blue.jpg	118_shovel_yellow.jpg	17	22	117_shovel_blue.jpg	Blue	0	Control	2319	NA	117_shovel_blue.jpg 118_shovel_yellow.jpg	1	N	3.3653
Macaque	Monkey	Yellow	43585	20423	MAC-Touch1	Adv Pref FC	Miyagi	Stroop_3_1_1.csv	20	290	2	None	3000	White	Scattered	103_cross_blue_blue.JPG	104_cross_blue_yellow.JPG	23	13	103_cross_blue_blue.JPG	Blue	0	Incongruent	947	NA	103_cross_blue_blue.JPG 104_cross_blue_yellow.JPG	1	N	2.97635
Macaque	Monkey	Yellow	43585	21884	MAC-Touch1	Adv Pref FC	Miyagi	Stroop_3_1_1.csv	21	290	2	None	3000	White	Scattered	107_fidget_spinner_blue.jpg	108_fidget_spinner_yellow.jpg	14	25	107_fidget_spinner_blue.jpg	Blue	0	Control	1526	NA	107_fidget_spinner_blue.jpg 108_fidget_spinner_yellow.jpg	1	N	3.18355
Macaque	Monkey	Yellow	43585	11-31-04	MAC-Touch1	Adv Pref FC	Miyagi	Stroop_3_1_1.csv	22	290	2	None	3000	White	Scattered	123_star_blue_blue.jpg	124_star_blue_yellow.jpg	24	12	124_star_blue_yellow.jpg	Yellow	1	Incongruent	1305	NA	123_star_blue_blue.jpg 124_star_blue_yellow.jpg	1	N	3.11561
Macaque	Monkey	Yellow	43585	11-31-08	MAC-Touch1	Adv Pref FC	Miyagi	Stroop_3_1_1.csv	23	290	2	None	3000	White	Scattered	113_heart_yellow_blue.jpg	114_heart_yellow_yellow.jpg	22	11	113_heart_yellow_blue.jpg	Blue	0	Congruent	1769	NA	113_heart_yellow_blue.jpg 114_heart_yellow_yellow.jpg	1	N	3.24773
Macaque	Monkey	Yellow	43585	11-31-13	MAC-Touch1	Adv Pref FC	Miyagi	Stroop_3_1_1.csv	24	290	2	None	3000	White	Scattered	119_square_blue_blue.jpg	120_square_blue_yellow.jpg	17	24	119_square_blue_blue.jpg	Blue	0	Incongruent	1543	NA	119_square_blue_blue.jpg 120_square_blue_yellow.jpg	1	N	3.18837
Macaque	Monkey	Yellow	43585	11-31-18	MAC-Touch1	Adv Pref FC	Miyagi	Stroop_3_1_1.csv	25	290	2	None	3000	White	Scattered	117_shovel_blue.jpg	118_shovel_yellow.jpg	16	14	118_shovel_yellow.jpg	Yellow	1	Control	1392	NA	117_shovel_blue.jpg 118_shovel_yellow.jpg	1	N	3.14364
Macaque	Monkey	Yellow	43585	11-31-22	MAC-Touch1	Adv Pref FC	Miyagi	Stroop_3_1_1.csv	26	290	2	None	3000	White	Scattered	105_cross_yellow_blue.jpg	106_cross_yellow_yellow.jpg	18	16	106_cross_yellow_yellow.jpg	Yellow	1	Congruent	2844	NA	105_cross_yellow_blue.jpg 106_cross_yellow_yellow.jpg	1	N	3.45393
Macaque	Monkey	Yellow	43585	11-31-28	MAC-Touch1	Adv Pref FC	Miyagi	Stroop_3_1_1.csv	27	290	2	None	3000	White	Scattered	123_star_blue_blue.jpg	124_star_blue_yellow.jpg	24	13	124_star_blue_yellow.jpg	Yellow	1	Incongruent	1135	NA	123_star_blue_blue.jpg 124_star_blue_yellow.jpg	1	N	3.055
Macaque	Monkey	Yellow	43585	11-31-33	MAC-Touch1	Adv Pref FC	Miyagi	Stroop_3_1_1.csv	28	290	2	None	3000	White	Scattered	111_heart_blue_blue.jpg	112_heart_blue_yellow.jpg	18	11	111_heart_blue_blue.jpg	Blue	0	Incongruent	1753	NA	111_heart_blue_blue.jpg 112_heart_blue_yellow.jpg	1	N	3.24378
Macaque	Monkey	Yellow	43585	11-31-37	MAC-Touch1	Adv Pref FC	Miyagi	Stroop_3_1_1.csv	29	290	2	None	3000	White	Scattered	101_bicycle_blue.JPG	102_bicycle_yellow.JPG	24	12	101_bicycle_blue.JPG	Blue	0	Control	2323	NA	101_bicycle_blue.JPG 102_bicycle_yellow.JPG	1	N	3.36605
Macaque	Monkey	Yellow	43585	11-31-43	MAC-Touch1	Adv Pref FC	Miyagi	Stroop_3_1_1.csv	30	290	2	None	3000	White	Scattered	103_cross_blue_blue.JPG	104_cross_blue_yellow.JPG	17	11	104_cross_blue_yellow.JPG	Yellow	1	Incongruent	6412	NA	103_cross_blue_blue.JPG 104_cross_blue_yellow.JPG	1	Y	3.80699
Macaque	Monkey	Yellow	43587	11-53-44	MAC-Touch1	Adv Pref FC	Miyagi	Stroop_3_1_2.csv	1	290	2	None	3000	White	Scattered	113_heart_yellow_blue.jpg	114_heart_yellow_yellow.jpg	19	23	113_heart_yellow_blue.jpg	Blue	0	Congruent	1495	NA	113_heart_yellow_blue.jpg 114_heart_yellow_yellow.jpg	2	N	3.17464
Macaque	Monkey	Yellow	43587	11-53-48	MAC-Touch1	Adv Pref FC	Miyagi	Stroop_3_1_2.csv	2	290	2	None	3000	White	Scattered	103_cross_blue_blue.JPG	104_cross_blue_yellow.JPG	17	12	103_cross_blue_blue.JPG	Blue	0	Incongruent	13607	NA	103_cross_blue_blue.JPG 104_cross_blue_yellow.JPG	2	Y	4.13376
Macaque	Monkey	Yellow	43587	11-54-05	MAC-Touch1	Adv Pref FC	Miyagi	Stroop_3_1_2.csv	3	290	2	None	3000	White	Scattered	121_square_yellow_blue.jpg	122_square_yellow_yellow.jpg	25	18	122_square_yellow_yellow.jpg	Yellow	1	Congruent	6922	NA	121_square_yellow_blue.jpg 122_square_yellow_yellow.jpg	2	Y	3.84023
Macaque	Monkey	Yellow	43587	11-54-15	MAC-Touch1	Adv Pref FC	Miyagi	Stroop_3_1_2.csv	4	290	2	None	3000	White	Scattered	117_shovel_blue.jpg	118_shovel_yellow.jpg	25	15	118_shovel_yellow.jpg	Yellow	1	Control	2140	NA	117_shovel_blue.jpg 118_shovel_yellow.jpg	2	N	3.33041
Macaque	Monkey	Yellow	43587	11-54-20	MAC-Touch1	Adv Pref FC	Miyagi	Stroop_3_1_2.csv	5	290	2	None	3000	White	Scattered	123_star_blue_blue.jpg	124_star_blue_yellow.jpg	25	24	124_star_blue_yellow.jpg	Yellow	1	Incongruent	11531	NA	123_star_blue_blue.jpg 124_star_blue_yellow.jpg	2	Y	4.06187
Macaque	Monkey	Yellow	43587	11-54-35	MAC-Touch1	Adv Pref FC	Miyagi	Stroop_3_1_2.csv	6	290	2	None	3000	White	Scattered	109_fork_blue.jpg	110_fork_yellow.jpg	21	15	110_fork_yellow.jpg	Yellow	1	Control	2831	NA	109_fork_blue.jpg 110_fork_yellow.jpg	2	N	3.45194
Macaque	Monkey	Yellow	43587	11-54-41	MAC-Touch1	Adv Pref FC	Miyagi	Stroop_3_1_2.csv	7	290	2	None	3000	White	Scattered	121_square_yellow_blue.jpg	122_square_yellow_yellow.jpg	14	13	121_square_yellow_blue.jpg	Blue	0	Congruent	5572	NA	121_square_yellow_blue.jpg 122_square_yellow_yellow.jpg	2	N	3.74601
Macaque	Monkey	Yellow	43587	11-54-49	MAC-Touch1	Adv Pref FC	Miyagi	Stroop_3_1_2.csv	8	290	2	None	3000	White	Scattered	111_heart_blue_blue.jpg	112_heart_blue_yellow.jpg	23	14	112_heart_blue_yellow.jpg	Yellow	1	Incongruent	1274	NA	111_heart_blue_blue.jpg 112_heart_blue_yellow.jpg	2	N	3.10517
Macaque	Monkey	Yellow	43587	11-54-54	MAC-Touch1	Adv Pref FC	Miyagi	Stroop_3_1_2.csv	9	290	2	None	3000	White	Scattered	125_star_yellow_blue.jpg	126_star_yellow_yellow.jpg	16	23	126_star_yellow_yellow.jpg	Yellow	1	Congruent	11205	NA	125_star_yellow_blue.jpg 126_star_yellow_yellow.jpg	2	Y	4.04941
Macaque	Monkey	Yellow	43587	11-55-08	MAC-Touch1	Adv Pref FC	Miyagi	Stroop_3_1_2.csv	10	290	2	None	3000	White	Scattered	107_fidget_spinner_blue.jpg	108_fidget_spinner_yellow.jpg	17	21	107_fidget_spinner_blue.jpg	Blue	0	Control	2043	NA	107_fidget_spinner_blue.jpg 108_fidget_spinner_yellow.jpg	2	N	3.31027
Macaque	Monkey	Yellow	43587	11-55-13	MAC-Touch1	Adv Pref FC	Miyagi	Stroop_3_1_2.csv	11	290	2	None	3000	White	Scattered	121_square_yellow_blue.jpg	122_square_yellow_yellow.jpg	13	18	122_square_yellow_yellow.jpg	Yellow	1	Congruent	5933	NA	121_square_yellow_blue.jpg 122_square_yellow_yellow.jpg	2	Y	3.77327
Macaque	Monkey	Yellow	43587	11-55-22	MAC-Touch1	Adv Pref FC	Miyagi	Stroop_3_1_2.csv	12	290	2	None	3000	White	Scattered	111_heart_blue_blue.jpg	112_heart_blue_yellow.jpg	14	23	111_heart_blue_blue.jpg	Blue	0	Incongruent	1692	NA	111_heart_blue_blue.jpg 112_heart_blue_yellow.jpg	2	N	3.2284
Macaque	Monkey	Yellow	43587	11-55-27	MAC-Touch1	Adv Pref FC	Miyagi	Stroop_3_1_2.csv	13	290	2	None	3000	White	Scattered	119_square_blue_blue.jpg	120_square_blue_yellow.jpg	20	18	119_square_blue_blue.jpg	Blue	0	Incongruent	1234	NA	119_square_blue_blue.jpg 120_square_blue_yellow.jpg	2	N	3.09132
Macaque	Monkey	Yellow	43587	11-55-32	MAC-Touch1	Adv Pref FC	Miyagi	Stroop_3_1_2.csv	14	290	2	None	3000	White	Scattered	113_heart_yellow_blue.jpg	114_heart_yellow_yellow.jpg	17	18	114_heart_yellow_yellow.jpg	Yellow	1	Congruent	9010	NA	113_heart_yellow_blue.jpg 114_heart_yellow_yellow.jpg	2	Y	3.95472
Macaque	Monkey	Yellow	43587	11-55-44	MAC-Touch1	Adv Pref FC	Miyagi	Stroop_3_1_2.csv	15	290	2	None	3000	White	Scattered	109_fork_blue.jpg	110_fork_yellow.jpg	25	13	110_fork_yellow.jpg	Yellow	1	Control	3653	NA	109_fork_blue.jpg 110_fork_yellow.jpg	2	N	3.56265
Macaque	Monkey	Yellow	43587	11-55-50	MAC-Touch1	Adv Pref FC	Miyagi	Stroop_3_1_2.csv	16	290	2	None	3000	White	Scattered	111_heart_blue_blue.jpg	112_heart_blue_yellow.jpg	11	12	112_heart_blue_yellow.jpg	Yellow	1	Incongruent	8602	NA	111_heart_blue_blue.jpg 112_heart_blue_yellow.jpg	2	Y	3.9346
Macaque	Monkey	Yellow	43587	11-56-02	MAC-Touch1	Adv Pref FC	Miyagi	Stroop_3_1_2.csv	17	290	2	None	3000	White	Scattered	103_cross_blue_blue.JPG	104_cross_blue_yellow.JPG	23	16	104_cross_blue_yellow.JPG	Yellow	1	Incongruent	1848	NA	103_cross_blue_blue.JPG 104_cross_blue_yellow.JPG	2	N	3.2667
Macaque	Monkey	Yellow	43587	11-56-07	MAC-Touch1	Adv Pref FC	Miyagi	Stroop_3_1_2.csv	18	290	2	None	3000	White	Scattered	101_bicycle_blue.JPG	102_bicycle_yellow.JPG	20	11	101_bicycle_blue.JPG	Blue	0	Control	3228	NA	101_bicycle_blue.JPG 102_bicycle_yellow.JPG	2	N	3.50893
Macaque	Monkey	Yellow	43587	11-56-13	MAC-Touch1	Adv Pref FC	Miyagi	Stroop_3_1_2.csv	19	290	2	None	3000	White	Scattered	105_cross_yellow_blue.jpg	106_cross_yellow_yellow.jpg	23	17	106_cross_yellow_yellow.jpg	Yellow	1	Congruent	1609	NA	105_cross_yellow_blue.jpg 106_cross_yellow_yellow.jpg	2	N	3.20656
Macaque	Monkey	Yellow	43587	11-56-18	MAC-Touch1	Adv Pref FC	Miyagi	Stroop_3_1_2.csv	20	290	2	None	3000	White	Scattered	117_shovel_blue.jpg	118_shovel_yellow.jpg	23	24	118_shovel_yellow.jpg	Yellow	1	Control	1168	NA	117_shovel_blue.jpg 118_shovel_yellow.jpg	2	N	3.06744
Macaque	Monkey	Yellow	43587	11-56-22	MAC-Touch1	Adv Pref FC	Miyagi	Stroop_3_1_2.csv	21	290	2	None	3000	White	Scattered	125_star_yellow_blue.jpg	126_star_yellow_yellow.jpg	24	12	126_star_yellow_yellow.jpg	Yellow	1	Congruent	1937	NA	125_star_yellow_blue.jpg 126_star_yellow_yellow.jpg	2	N	3.28713
Macaque	Monkey	Yellow	43587	11-56-28	MAC-Touch1	Adv Pref FC	Miyagi	Stroop_3_1_2.csv	22	290	2	None	3000	White	Scattered	101_bicycle_blue.JPG	102_bicycle_yellow.JPG	15	25	102_bicycle_yellow.JPG	Yellow	1	Control	4324	NA	101_bicycle_blue.JPG 102_bicycle_yellow.JPG	2	N	3.63589
Macaque	Monkey	Yellow	43587	11-56-35	MAC-Touch1	Adv Pref FC	Miyagi	Stroop_3_1_2.csv	23	290	2	None	3000	White	Scattered	113_heart_yellow_blue.jpg	114_heart_yellow_yellow.jpg	24	18	114_heart_yellow_yellow.jpg	Yellow	1	Congruent	9636	NA	113_heart_yellow_blue.jpg 114_heart_yellow_yellow.jpg	2	Y	3.9839
Macaque	Monkey	Yellow	43587	11-56-48	MAC-Touch1	Adv Pref FC	Miyagi	Stroop_3_1_2.csv	24	290	2	None	3000	White	Scattered	119_square_blue_blue.jpg	120_square_blue_yellow.jpg	15	12	120_square_blue_yellow.jpg	Yellow	1	Incongruent	3098	NA	119_square_blue_blue.jpg 120_square_blue_yellow.jpg	2	N	3.49108
Macaque	Monkey	Yellow	43587	11-56-54	MAC-Touch1	Adv Pref FC	Miyagi	Stroop_3_1_2.csv	25	290	2	None	3000	White	Scattered	115_mug_blue.jpg	116_mug_yellow.jpg	15	12	116_mug_yellow.jpg	Yellow	1	Control	4963	NA	115_mug_blue.jpg 116_mug_yellow.jpg	2	N	3.69574
Macaque	Monkey	Yellow	43587	11-57-02	MAC-Touch1	Adv Pref FC	Miyagi	Stroop_3_1_2.csv	26	290	2	None	3000	White	Scattered	123_star_blue_blue.jpg	124_star_blue_yellow.jpg	13	14	124_star_blue_yellow.jpg	Yellow	1	Incongruent	8819	NA	123_star_blue_blue.jpg 124_star_blue_yellow.jpg	2	Y	3.94542
Macaque	Monkey	Yellow	43587	11-57-14	MAC-Touch1	Adv Pref FC	Miyagi	Stroop_3_1_2.csv	27	290	2	None	3000	White	Scattered	105_cross_yellow_blue.jpg	106_cross_yellow_yellow.jpg	17	20	106_cross_yellow_yellow.jpg	Yellow	1	Congruent	2753	NA	105_cross_yellow_blue.jpg 106_cross_yellow_yellow.jpg	2	N	3.43981
Macaque	Monkey	Yellow	43587	11-57-20	MAC-Touch1	Adv Pref FC	Miyagi	Stroop_3_1_2.csv	28	290	2	None	3000	White	Scattered	107_fidget_spinner_blue.jpg	108_fidget_spinner_yellow.jpg	20	17	108_fidget_spinner_yellow.jpg	Yellow	1	Control	2685	NA	107_fidget_spinner_blue.jpg 108_fidget_spinner_yellow.jpg	2	N	3.42894
Macaque	Monkey	Yellow	43587	11-57-26	MAC-Touch1	Adv Pref FC	Miyagi	Stroop_3_1_2.csv	29	290	2	None	3000	White	Scattered	119_square_blue_blue.jpg	120_square_blue_yellow.jpg	25	22	120_square_blue_yellow.jpg	Yellow	1	Incongruent	10611	NA	119_square_blue_blue.jpg 120_square_blue_yellow.jpg	2	Y	4.02576
Macaque	Monkey	Yellow	43587	11-57-39	MAC-Touch1	Adv Pref FC	Miyagi	Stroop_3_1_2.csv	30	290	2	None	3000	White	Scattered	115_mug_blue.jpg	116_mug_yellow.jpg	13	17	116_mug_yellow.jpg	Yellow	1	Control	4235	NA	115_mug_blue.jpg 116_mug_yellow.jpg	2	N	3.62685
Macaque	Monkey	Yellow	43588	43434	MAC-Touch1	Adv Pref FC	Miyagi	Stroop_3_1_3.csv	1	290	2	None	3000	White	Scattered	123_star_blue_blue.jpg	124_star_blue_yellow.jpg	16	19	124_star_blue_yellow.jpg	Yellow	1	Incongruent	4904	NA	123_star_blue_blue.jpg 124_star_blue_yellow.jpg	3	N	3.69055
Macaque	Monkey	Yellow	43588	46356	MAC-Touch1	Adv Pref FC	Miyagi	Stroop_3_1_3.csv	2	290	2	None	3000	White	Scattered	115_mug_blue.jpg	116_mug_yellow.jpg	16	20	116_mug_yellow.jpg	Yellow	1	Control	2982	NA	115_mug_blue.jpg 116_mug_yellow.jpg	3	N	3.47451
Macaque	Monkey	Yellow	43588	12023	MAC-Touch1	Adv Pref FC	Miyagi	Stroop_3_1_3.csv	3	290	2	None	3000	White	Scattered	105_cross_yellow_blue.jpg	106_cross_yellow_yellow.jpg	21	23	105_cross_yellow_blue.jpg	Blue	0	Congruent	7402	NA	105_cross_yellow_blue.jpg 106_cross_yellow_yellow.jpg	3	Y	3.86935
Macaque	Monkey	Yellow	43588	15675	MAC-Touch1	Adv Pref FC	Miyagi	Stroop_3_1_3.csv	4	290	2	None	3000	White	Scattered	109_fork_blue.jpg	110_fork_yellow.jpg	11	16	110_fork_yellow.jpg	Yellow	1	Control	4374	NA	109_fork_blue.jpg 110_fork_yellow.jpg	3	N	3.64088
Macaque	Monkey	Yellow	43588	18597	MAC-Touch1	Adv Pref FC	Miyagi	Stroop_3_1_3.csv	5	290	2	None	3000	White	Scattered	123_star_blue_blue.jpg	124_star_blue_yellow.jpg	24	19	124_star_blue_yellow.jpg	Yellow	1	Incongruent	1938	NA	123_star_blue_blue.jpg 124_star_blue_yellow.jpg	3	N	3.28735
Macaque	Monkey	Yellow	43588	20423	MAC-Touch1	Adv Pref FC	Miyagi	Stroop_3_1_3.csv	6	290	2	None	3000	White	Scattered	113_heart_yellow_blue.jpg	114_heart_yellow_yellow.jpg	22	12	114_heart_yellow_yellow.jpg	Yellow	1	Congruent	3863	NA	113_heart_yellow_blue.jpg 114_heart_yellow_yellow.jpg	3	N	3.58692
Macaque	Monkey	Yellow	43588	11-31-02	MAC-Touch1	Adv Pref FC	Miyagi	Stroop_3_1_3.csv	7	290	2	None	3000	White	Scattered	117_shovel_blue.jpg	118_shovel_yellow.jpg	15	20	117_shovel_blue.jpg	Blue	0	Control	2520	NA	117_shovel_blue.jpg 118_shovel_yellow.jpg	3	N	3.4014
Macaque	Monkey	Yellow	43588	11-31-07	MAC-Touch1	Adv Pref FC	Miyagi	Stroop_3_1_3.csv	8	290	2	None	3000	White	Scattered	125_star_yellow_blue.jpg	126_star_yellow_yellow.jpg	11	18	126_star_yellow_yellow.jpg	Yellow	1	Congruent	1065	NA	125_star_yellow_blue.jpg 126_star_yellow_yellow.jpg	3	N	3.02735
Macaque	Monkey	Yellow	43588	11-31-11	MAC-Touch1	Adv Pref FC	Miyagi	Stroop_3_1_3.csv	9	290	2	None	3000	White	Scattered	109_fork_blue.jpg	110_fork_yellow.jpg	12	16	110_fork_yellow.jpg	Yellow	1	Control	3585	NA	109_fork_blue.jpg 110_fork_yellow.jpg	3	N	3.55449
Macaque	Monkey	Yellow	43588	11-31-18	MAC-Touch1	Adv Pref FC	Miyagi	Stroop_3_1_3.csv	10	290	2	None	3000	White	Scattered	113_heart_yellow_blue.jpg	114_heart_yellow_yellow.jpg	15	16	113_heart_yellow_blue.jpg	Blue	0	Congruent	3852	NA	113_heart_yellow_blue.jpg 114_heart_yellow_yellow.jpg	3	N	3.58569
Macaque	Monkey	Yellow	43588	11-31-25	MAC-Touch1	Adv Pref FC	Miyagi	Stroop_3_1_3.csv	11	290	2	None	3000	White	Scattered	111_heart_blue_blue.jpg	112_heart_blue_yellow.jpg	13	11	111_heart_blue_blue.jpg	Blue	0	Incongruent	6000	NA	111_heart_blue_blue.jpg 112_heart_blue_yellow.jpg	3	Y	3.77815
Macaque	Monkey	Yellow	43588	11-31-34	MAC-Touch1	Adv Pref FC	Miyagi	Stroop_3_1_3.csv	12	290	2	None	3000	White	Scattered	119_square_blue_blue.jpg	120_square_blue_yellow.jpg	23	18	120_square_blue_yellow.jpg	Yellow	1	Incongruent	1093	NA	119_square_blue_blue.jpg 120_square_blue_yellow.jpg	3	N	3.03862
Macaque	Monkey	Yellow	43588	11-31-38	MAC-Touch1	Adv Pref FC	Miyagi	Stroop_3_1_3.csv	13	290	2	None	3000	White	Scattered	105_cross_yellow_blue.jpg	106_cross_yellow_yellow.jpg	18	19	105_cross_yellow_blue.jpg	Blue	0	Congruent	3310	NA	105_cross_yellow_blue.jpg 106_cross_yellow_yellow.jpg	3	N	3.51983
Macaque	Monkey	Yellow	43588	11-31-45	MAC-Touch1	Adv Pref FC	Miyagi	Stroop_3_1_3.csv	14	290	2	None	3000	White	Scattered	101_bicycle_blue.JPG	102_bicycle_yellow.JPG	22	16	101_bicycle_blue.JPG	Blue	0	Control	7967	NA	101_bicycle_blue.JPG 102_bicycle_yellow.JPG	3	Y	3.90129
Macaque	Monkey	Yellow	43588	11-31-56	MAC-Touch1	Adv Pref FC	Miyagi	Stroop_3_1_3.csv	15	290	2	None	3000	White	Scattered	119_square_blue_blue.jpg	120_square_blue_yellow.jpg	15	19	120_square_blue_yellow.jpg	Yellow	1	Incongruent	2534	NA	119_square_blue_blue.jpg 120_square_blue_yellow.jpg	3	N	3.40381
Macaque	Monkey	Yellow	43588	11-32-01	MAC-Touch1	Adv Pref FC	Miyagi	Stroop_3_1_3.csv	16	290	2	None	3000	White	Scattered	105_cross_yellow_blue.jpg	106_cross_yellow_yellow.jpg	22	14	106_cross_yellow_yellow.jpg	Yellow	1	Congruent	4429	NA	105_cross_yellow_blue.jpg 106_cross_yellow_yellow.jpg	3	N	3.64631
Macaque	Monkey	Yellow	43588	11-32-09	MAC-Touch1	Adv Pref FC	Miyagi	Stroop_3_1_3.csv	17	290	2	None	3000	White	Scattered	103_cross_blue_blue.JPG	104_cross_blue_yellow.JPG	24	25	104_cross_blue_yellow.JPG	Yellow	1	Incongruent	1452	NA	103_cross_blue_blue.JPG 104_cross_blue_yellow.JPG	3	N	3.16197
Macaque	Monkey	Yellow	43588	11-32-13	MAC-Touch1	Adv Pref FC	Miyagi	Stroop_3_1_3.csv	18	290	2	None	3000	White	Scattered	115_mug_blue.jpg	116_mug_yellow.jpg	14	22	116_mug_yellow.jpg	Yellow	1	Control	1356	NA	115_mug_blue.jpg 116_mug_yellow.jpg	3	N	3.13226
Macaque	Monkey	Yellow	43588	11-32-18	MAC-Touch1	Adv Pref FC	Miyagi	Stroop_3_1_3.csv	19	290	2	None	3000	White	Scattered	125_star_yellow_blue.jpg	126_star_yellow_yellow.jpg	22	14	126_star_yellow_yellow.jpg	Yellow	1	Congruent	6234	NA	125_star_yellow_blue.jpg 126_star_yellow_yellow.jpg	3	Y	3.79477
Macaque	Monkey	Yellow	43588	11-32-27	MAC-Touch1	Adv Pref FC	Miyagi	Stroop_3_1_3.csv	20	290	2	None	3000	White	Scattered	107_fidget_spinner_blue.jpg	108_fidget_spinner_yellow.jpg	18	21	108_fidget_spinner_yellow.jpg	Yellow	1	Control	9410	NA	107_fidget_spinner_blue.jpg 108_fidget_spinner_yellow.jpg	3	Y	3.97359
Macaque	Monkey	Yellow	43588	11-32-39	MAC-Touch1	Adv Pref FC	Miyagi	Stroop_3_1_3.csv	21	290	2	None	3000	White	Scattered	123_star_blue_blue.jpg	124_star_blue_yellow.jpg	20	24	124_star_blue_yellow.jpg	Yellow	1	Incongruent	4065	NA	123_star_blue_blue.jpg 124_star_blue_yellow.jpg	3	N	3.60906
Macaque	Monkey	Yellow	43588	11-32-47	MAC-Touch1	Adv Pref FC	Miyagi	Stroop_3_1_3.csv	22	290	2	None	3000	White	Scattered	101_bicycle_blue.JPG	102_bicycle_yellow.JPG	25	15	102_bicycle_yellow.JPG	Yellow	1	Control	1739	NA	101_bicycle_blue.JPG 102_bicycle_yellow.JPG	3	N	3.2403
Macaque	Monkey	Yellow	43588	11-32-51	MAC-Touch1	Adv Pref FC	Miyagi	Stroop_3_1_3.csv	23	290	2	None	3000	White	Scattered	121_square_yellow_blue.jpg	122_square_yellow_yellow.jpg	25	19	122_square_yellow_yellow.jpg	Yellow	1	Congruent	1086	NA	121_square_yellow_blue.jpg 122_square_yellow_yellow.jpg	3	N	3.03583
Macaque	Monkey	Yellow	43588	11-32-56	MAC-Touch1	Adv Pref FC	Miyagi	Stroop_3_1_3.csv	24	290	2	None	3000	White	Scattered	111_heart_blue_blue.jpg	112_heart_blue_yellow.jpg	21	13	112_heart_blue_yellow.jpg	Yellow	1	Incongruent	1595	NA	111_heart_blue_blue.jpg 112_heart_blue_yellow.jpg	3	N	3.20276
Macaque	Monkey	Yellow	43588	11-33-00	MAC-Touch1	Adv Pref FC	Miyagi	Stroop_3_1_3.csv	25	290	2	None	3000	White	Scattered	107_fidget_spinner_blue.jpg	108_fidget_spinner_yellow.jpg	15	24	108_fidget_spinner_yellow.jpg	Yellow	1	Control	2415	NA	107_fidget_spinner_blue.jpg 108_fidget_spinner_yellow.jpg	3	N	3.38292
Macaque	Monkey	Yellow	43588	11-33-06	MAC-Touch1	Adv Pref FC	Miyagi	Stroop_3_1_3.csv	26	290	2	None	3000	White	Scattered	103_cross_blue_blue.JPG	104_cross_blue_yellow.JPG	21	24	104_cross_blue_yellow.JPG	Yellow	1	Incongruent	1865	NA	103_cross_blue_blue.JPG 104_cross_blue_yellow.JPG	3	N	3.27068
Macaque	Monkey	Yellow	43588	11-33-11	MAC-Touch1	Adv Pref FC	Miyagi	Stroop_3_1_3.csv	27	290	2	None	3000	White	Scattered	125_star_yellow_blue.jpg	126_star_yellow_yellow.jpg	12	13	126_star_yellow_yellow.jpg	Yellow	1	Congruent	6323	NA	125_star_yellow_blue.jpg 126_star_yellow_yellow.jpg	3	Y	3.80092
Macaque	Monkey	Yellow	43588	11-33-20	MAC-Touch1	Adv Pref FC	Miyagi	Stroop_3_1_3.csv	28	290	2	None	3000	White	Scattered	117_shovel_blue.jpg	118_shovel_yellow.jpg	11	25	118_shovel_yellow.jpg	Yellow	1	Control	1853	NA	117_shovel_blue.jpg 118_shovel_yellow.jpg	3	N	3.26788
Macaque	Monkey	Yellow	43588	11-33-25	MAC-Touch1	Adv Pref FC	Miyagi	Stroop_3_1_3.csv	29	290	2	None	3000	White	Scattered	121_square_yellow_blue.jpg	122_square_yellow_yellow.jpg	25	19	122_square_yellow_yellow.jpg	Yellow	1	Congruent	7261	NA	121_square_yellow_blue.jpg 122_square_yellow_yellow.jpg	3	Y	3.861
Macaque	Monkey	Yellow	43588	11-33-36	MAC-Touch1	Adv Pref FC	Miyagi	Stroop_3_1_3.csv	30	290	2	None	3000	White	Scattered	103_cross_blue_blue.JPG	104_cross_blue_yellow.JPG	13	16	104_cross_blue_yellow.JPG	Yellow	1	Incongruent	7804	NA	103_cross_blue_blue.JPG 104_cross_blue_yellow.JPG	3	Y	3.89232
Macaque	Monkey	Yellow	43591	11-38-40	MAC-Touch1	Adv Pref FC	Miyagi	Stroop_3_1_4.csv	1	290	2	None	3000	White	Scattered	119_square_blue_blue.jpg	120_square_blue_yellow.jpg	16	20	120_square_blue_yellow.jpg	Yellow	1	Incongruent	1864	NA	119_square_blue_blue.jpg 120_square_blue_yellow.jpg	4	N	3.27045
Macaque	Monkey	Yellow	43591	11-38-54	MAC-Touch1	Adv Pref FC	Miyagi	Stroop_3_1_4.csv	2	290	2	None	3000	White	Scattered	125_star_yellow_blue.jpg	126_star_yellow_yellow.jpg	20	13	126_star_yellow_yellow.jpg	Yellow	1	Congruent	3525	NA	125_star_yellow_blue.jpg 126_star_yellow_yellow.jpg	4	N	3.54716
Macaque	Monkey	Yellow	43591	11-39-00	MAC-Touch1	Adv Pref FC	Miyagi	Stroop_3_1_4.csv	3	290	2	None	3000	White	Scattered	111_heart_blue_blue.jpg	112_heart_blue_yellow.jpg	11	14	112_heart_blue_yellow.jpg	Yellow	1	Incongruent	1909	NA	111_heart_blue_blue.jpg 112_heart_blue_yellow.jpg	4	N	3.28081
Macaque	Monkey	Yellow	43591	11-39-05	MAC-Touch1	Adv Pref FC	Miyagi	Stroop_3_1_4.csv	4	290	2	None	3000	White	Scattered	105_cross_yellow_blue.jpg	106_cross_yellow_yellow.jpg	25	12	106_cross_yellow_yellow.jpg	Yellow	1	Congruent	1800	NA	105_cross_yellow_blue.jpg 106_cross_yellow_yellow.jpg	4	N	3.25527
Macaque	Monkey	Yellow	43591	11-39-10	MAC-Touch1	Adv Pref FC	Miyagi	Stroop_3_1_4.csv	5	290	2	None	3000	White	Scattered	115_mug_blue.jpg	116_mug_yellow.jpg	24	21	115_mug_blue.jpg	Blue	0	Control	2216	NA	115_mug_blue.jpg 116_mug_yellow.jpg	4	N	3.34557
Macaque	Monkey	Yellow	43591	11-39-16	MAC-Touch1	Adv Pref FC	Miyagi	Stroop_3_1_4.csv	6	290	2	None	3000	White	Scattered	113_heart_yellow_blue.jpg	114_heart_yellow_yellow.jpg	11	23	113_heart_yellow_blue.jpg	Blue	0	Congruent	2180	NA	113_heart_yellow_blue.jpg 114_heart_yellow_yellow.jpg	4	N	3.33846
Macaque	Monkey	Yellow	43591	11-39-21	MAC-Touch1	Adv Pref FC	Miyagi	Stroop_3_1_4.csv	7	290	2	None	3000	White	Scattered	103_cross_blue_blue.JPG	104_cross_blue_yellow.JPG	16	13	104_cross_blue_yellow.JPG	Yellow	1	Incongruent	4256	NA	103_cross_blue_blue.JPG 104_cross_blue_yellow.JPG	4	N	3.629
Macaque	Monkey	Yellow	43593	12764	MAC-Touch1	Adv Pref FC	Miyagi	Stroop_3_1_1.csv	1	290	2	None	3000	White	Scattered	115_mug_blue.jpg	116_mug_yellow.jpg	16	12	116_mug_yellow.jpg	Yellow	1	Control	3015	NA	115_mug_blue.jpg 116_mug_yellow.jpg	5	N	3.47929
Macaque	Monkey	Yellow	43593	14956	MAC-Touch1	Adv Pref FC	Miyagi	Stroop_3_1_1.csv	2	290	2	None	3000	White	Scattered	125_star_yellow_blue.jpg	126_star_yellow_yellow.jpg	14	25	125_star_yellow_blue.jpg	Blue	0	Congruent	5278	NA	125_star_yellow_blue.jpg 126_star_yellow_yellow.jpg	5	N	3.72247
Macaque	Monkey	Yellow	43593	17878	MAC-Touch1	Adv Pref FC	Miyagi	Stroop_3_1_1.csv	3	290	2	None	3000	White	Scattered	109_fork_blue.jpg	110_fork_yellow.jpg	25	14	110_fork_yellow.jpg	Yellow	1	Control	1260	NA	109_fork_blue.jpg 110_fork_yellow.jpg	5	N	3.10037
Macaque	Monkey	Yellow	43593	19704	MAC-Touch1	Adv Pref FC	Miyagi	Stroop_3_1_1.csv	4	290	2	None	3000	White	Scattered	123_star_blue_blue.jpg	124_star_blue_yellow.jpg	17	19	124_star_blue_yellow.jpg	Yellow	1	Incongruent	8814	NA	123_star_blue_blue.jpg 124_star_blue_yellow.jpg	5	Y	3.94517
Macaque	Monkey	Yellow	43593	38698	MAC-Touch1	Adv Pref FC	Miyagi	Stroop_3_1_1.csv	5	290	2	None	3000	White	Scattered	105_cross_yellow_blue.jpg	106_cross_yellow_yellow.jpg	23	24	106_cross_yellow_yellow.jpg	Yellow	1	Congruent	2521	NA	105_cross_yellow_blue.jpg 106_cross_yellow_yellow.jpg	5	N	3.40157
Macaque	Monkey	Yellow	43593	40524	MAC-Touch1	Adv Pref FC	Miyagi	Stroop_3_1_1.csv	6	290	2	None	3000	White	Scattered	125_star_yellow_blue.jpg	126_star_yellow_yellow.jpg	12	25	126_star_yellow_yellow.jpg	Yellow	1	Congruent	6902	NA	125_star_yellow_blue.jpg 126_star_yellow_yellow.jpg	5	Y	3.83897
Macaque	Monkey	Yellow	43593	44177	MAC-Touch1	Adv Pref FC	Miyagi	Stroop_3_1_1.csv	7	290	2	None	3000	White	Scattered	115_mug_blue.jpg	116_mug_yellow.jpg	12	22	115_mug_blue.jpg	Blue	0	Control	4674	NA	115_mug_blue.jpg 116_mug_yellow.jpg	5	N	3.66969
Macaque	Monkey	Yellow	43593	47099	MAC-Touch1	Adv Pref FC	Miyagi	Stroop_3_1_1.csv	8	290	2	None	3000	White	Scattered	111_heart_blue_blue.jpg	112_heart_blue_yellow.jpg	18	12	112_heart_blue_yellow.jpg	Yellow	1	Incongruent	6287	NA	111_heart_blue_blue.jpg 112_heart_blue_yellow.jpg	5	Y	3.79844
Macaque	Monkey	Yellow	43593	13861	MAC-Touch1	Adv Pref FC	Miyagi	Stroop_3_1_1.csv	9	290	2	None	3000	White	Scattered	121_square_yellow_blue.jpg	122_square_yellow_yellow.jpg	18	19	122_square_yellow_yellow.jpg	Yellow	1	Congruent	1174	NA	121_square_yellow_blue.jpg 122_square_yellow_yellow.jpg	5	N	3.06967
Macaque	Monkey	Yellow	43593	15687	MAC-Touch1	Adv Pref FC	Miyagi	Stroop_3_1_1.csv	10	290	2	None	3000	White	Scattered	101_bicycle_blue.JPG	102_bicycle_yellow.JPG	24	23	101_bicycle_blue.JPG	Blue	0	Control	2279	NA	101_bicycle_blue.JPG 102_bicycle_yellow.JPG	5	N	3.35774
Macaque	Monkey	Yellow	43593	17513	MAC-Touch1	Adv Pref FC	Miyagi	Stroop_3_1_1.csv	11	290	2	None	3000	White	Scattered	105_cross_yellow_blue.jpg	106_cross_yellow_yellow.jpg	15	25	105_cross_yellow_blue.jpg	Blue	0	Congruent	6032	NA	105_cross_yellow_blue.jpg 106_cross_yellow_yellow.jpg	5	Y	3.78046
Macaque	Monkey	Yellow	43593	20801	MAC-Touch1	Adv Pref FC	Miyagi	Stroop_3_1_1.csv	12	290	2	None	3000	White	Scattered	107_fidget_spinner_blue.jpg	108_fidget_spinner_yellow.jpg	12	16	108_fidget_spinner_yellow.jpg	Yellow	1	Control	1912	NA	107_fidget_spinner_blue.jpg 108_fidget_spinner_yellow.jpg	5	N	3.28149
Macaque	Monkey	Yellow	43593	37238	MAC-Touch1	Adv Pref FC	Miyagi	Stroop_3_1_1.csv	13	290	2	None	3000	White	Scattered	125_star_yellow_blue.jpg	126_star_yellow_yellow.jpg	11	15	126_star_yellow_yellow.jpg	Yellow	1	Congruent	13541	NA	125_star_yellow_blue.jpg 126_star_yellow_yellow.jpg	5	Y	4.13165
Macaque	Monkey	Yellow	43593	43447	MAC-Touch1	Adv Pref FC	Miyagi	Stroop_3_1_1.csv	14	290	2	None	3000	White	Scattered	103_cross_blue_blue.JPG	104_cross_blue_yellow.JPG	23	19	104_cross_blue_yellow.JPG	Yellow	1	Incongruent	2234	NA	103_cross_blue_blue.JPG 104_cross_blue_yellow.JPG	5	N	3.34908
Macaque	Monkey	Yellow	43593	45273	MAC-Touch1	Adv Pref FC	Miyagi	Stroop_3_1_1.csv	15	290	2	None	3000	White	Scattered	109_fork_blue.jpg	110_fork_yellow.jpg	12	21	109_fork_blue.jpg	Blue	0	Control	8118	NA	109_fork_blue.jpg 110_fork_yellow.jpg	5	Y	3.90945
Macaque	Monkey	Yellow	43593	12766	MAC-Touch1	Adv Pref FC	Miyagi	Stroop_3_1_1.csv	16	290	2	None	3000	White	Scattered	121_square_yellow_blue.jpg	122_square_yellow_yellow.jpg	23	19	122_square_yellow_yellow.jpg	Yellow	1	Congruent	3900	NA	121_square_yellow_blue.jpg 122_square_yellow_yellow.jpg	5	N	3.59106
Macaque	Monkey	Yellow	43593	15688	MAC-Touch1	Adv Pref FC	Miyagi	Stroop_3_1_1.csv	17	290	2	None	3000	White	Scattered	119_square_blue_blue.jpg	120_square_blue_yellow.jpg	11	23	120_square_blue_yellow.jpg	Yellow	1	Incongruent	4517	NA	119_square_blue_blue.jpg 120_square_blue_yellow.jpg	5	N	3.65485
Macaque	Monkey	Yellow	43593	18245	MAC-Touch1	Adv Pref FC	Miyagi	Stroop_3_1_1.csv	18	290	2	None	3000	White	Scattered	113_heart_yellow_blue.jpg	114_heart_yellow_yellow.jpg	25	13	114_heart_yellow_yellow.jpg	Yellow	1	Congruent	1898	NA	113_heart_yellow_blue.jpg 114_heart_yellow_yellow.jpg	5	N	3.2783
Macaque	Monkey	Yellow	43593	20071	MAC-Touch1	Adv Pref FC	Miyagi	Stroop_3_1_1.csv	19	290	2	None	3000	White	Scattered	117_shovel_blue.jpg	118_shovel_yellow.jpg	17	16	118_shovel_yellow.jpg	Yellow	1	Control	1938	NA	117_shovel_blue.jpg 118_shovel_yellow.jpg	5	N	3.28735
Macaque	Monkey	Yellow	43593	21897	MAC-Touch1	Adv Pref FC	Miyagi	Stroop_3_1_1.csv	20	290	2	None	3000	White	Scattered	103_cross_blue_blue.JPG	104_cross_blue_yellow.JPG	12	24	104_cross_blue_yellow.JPG	Yellow	1	Incongruent	3801	NA	103_cross_blue_blue.JPG 104_cross_blue_yellow.JPG	5	N	3.5799
Macaque	Monkey	Yellow	43593	39065	MAC-Touch1	Adv Pref FC	Miyagi	Stroop_3_1_1.csv	21	290	2	None	3000	White	Scattered	107_fidget_spinner_blue.jpg	108_fidget_spinner_yellow.jpg	16	12	108_fidget_spinner_yellow.jpg	Yellow	1	Control	8364	NA	107_fidget_spinner_blue.jpg 108_fidget_spinner_yellow.jpg	5	Y	3.92241
Macaque	Monkey	Yellow	43593	43448	MAC-Touch1	Adv Pref FC	Miyagi	Stroop_3_1_1.csv	22	290	2	None	3000	White	Scattered	123_star_blue_blue.jpg	124_star_blue_yellow.jpg	20	21	123_star_blue_blue.jpg	Blue	0	Incongruent	1719	NA	123_star_blue_blue.jpg 124_star_blue_yellow.jpg	5	N	3.23528
Macaque	Monkey	Yellow	43593	44909	MAC-Touch1	Adv Pref FC	Miyagi	Stroop_3_1_1.csv	23	290	2	None	3000	White	Scattered	113_heart_yellow_blue.jpg	114_heart_yellow_yellow.jpg	20	25	113_heart_yellow_blue.jpg	Blue	0	Congruent	1052	NA	113_heart_yellow_blue.jpg 114_heart_yellow_yellow.jpg	5	N	3.02202
Macaque	Monkey	Yellow	43593	46735	MAC-Touch1	Adv Pref FC	Miyagi	Stroop_3_1_1.csv	24	290	2	None	3000	White	Scattered	119_square_blue_blue.jpg	120_square_blue_yellow.jpg	23	19	120_square_blue_yellow.jpg	Yellow	1	Incongruent	1389	NA	119_square_blue_blue.jpg 120_square_blue_yellow.jpg	5	N	3.1427
Macaque	Monkey	Yellow	43593	11671	MAC-Touch1	Adv Pref FC	Miyagi	Stroop_3_1_1.csv	25	290	2	None	3000	White	Scattered	117_shovel_blue.jpg	118_shovel_yellow.jpg	12	14	118_shovel_yellow.jpg	Yellow	1	Control	9491	NA	117_shovel_blue.jpg 118_shovel_yellow.jpg	5	Y	3.97731
Macaque	Monkey	Yellow	43593	16420	MAC-Touch1	Adv Pref FC	Miyagi	Stroop_3_1_1.csv	26	290	2	None	3000	White	Scattered	105_cross_yellow_blue.jpg	106_cross_yellow_yellow.jpg	25	22	105_cross_yellow_blue.jpg	Blue	0	Congruent	1586	NA	105_cross_yellow_blue.jpg 106_cross_yellow_yellow.jpg	5	N	3.2003
Macaque	Monkey	Yellow	43593	17881	MAC-Touch1	Adv Pref FC	Miyagi	Stroop_3_1_1.csv	27	290	2	None	3000	White	Scattered	123_star_blue_blue.jpg	124_star_blue_yellow.jpg	12	25	123_star_blue_blue.jpg	Blue	0	Incongruent	1234	NA	123_star_blue_blue.jpg 124_star_blue_yellow.jpg	5	N	3.09132
Macaque	Monkey	Yellow	43593	19707	MAC-Touch1	Adv Pref FC	Miyagi	Stroop_3_1_1.csv	28	290	2	None	3000	White	Scattered	111_heart_blue_blue.jpg	112_heart_blue_yellow.jpg	11	15	112_heart_blue_yellow.jpg	Yellow	1	Incongruent	1470	NA	111_heart_blue_blue.jpg 112_heart_blue_yellow.jpg	5	N	3.16732
Macaque	Monkey	Yellow	43593	21168	MAC-Touch1	Adv Pref FC	Miyagi	Stroop_3_1_1.csv	29	290	2	None	3000	White	Scattered	101_bicycle_blue.JPG	102_bicycle_yellow.JPG	22	14	102_bicycle_yellow.JPG	Yellow	1	Control	6066	NA	101_bicycle_blue.JPG 102_bicycle_yellow.JPG	5	Y	3.7829
Macaque	Monkey	Yellow	43593	39431	MAC-Touch1	Adv Pref FC	Miyagi	Stroop_3_1_1.csv	30	290	2	None	3000	White	Scattered	103_cross_blue_blue.JPG	104_cross_blue_yellow.JPG	24	14	104_cross_blue_yellow.JPG	Yellow	1	Incongruent	3122	NA	103_cross_blue_blue.JPG 104_cross_blue_yellow.JPG	5	N	3.49443
Macaque	Monkey	Yellow	43598	11-37-58	MAC-Touch1	Adv Pref FC	Miyagi	Stroop_3_1_2.csv	1	290	2	None	3000	White	Scattered	113_heart_yellow_blue.jpg	114_heart_yellow_yellow.jpg	15	22	113_heart_yellow_blue.jpg	Blue	0	Congruent	1832	NA	113_heart_yellow_blue.jpg 114_heart_yellow_yellow.jpg	6	N	3.26293
Macaque	Monkey	Yellow	43598	11-38-03	MAC-Touch1	Adv Pref FC	Miyagi	Stroop_3_1_2.csv	2	290	2	None	3000	White	Scattered	103_cross_blue_blue.JPG	104_cross_blue_yellow.JPG	11	18	104_cross_blue_yellow.JPG	Yellow	1	Incongruent	2723	NA	103_cross_blue_blue.JPG 104_cross_blue_yellow.JPG	6	N	3.43505
Macaque	Monkey	Yellow	43598	11-38-09	MAC-Touch1	Adv Pref FC	Miyagi	Stroop_3_1_2.csv	3	290	2	None	3000	White	Scattered	121_square_yellow_blue.jpg	122_square_yellow_yellow.jpg	16	20	122_square_yellow_yellow.jpg	Yellow	1	Congruent	955	NA	121_square_yellow_blue.jpg 122_square_yellow_yellow.jpg	6	N	2.98
Macaque	Monkey	Yellow	43598	11-38-13	MAC-Touch1	Adv Pref FC	Miyagi	Stroop_3_1_2.csv	4	290	2	None	3000	White	Scattered	117_shovel_blue.jpg	118_shovel_yellow.jpg	24	20	118_shovel_yellow.jpg	Yellow	1	Control	4449	NA	117_shovel_blue.jpg 118_shovel_yellow.jpg	6	N	3.64826
Macaque	Monkey	Yellow	43598	11-38-21	MAC-Touch1	Adv Pref FC	Miyagi	Stroop_3_1_2.csv	5	290	2	None	3000	White	Scattered	123_star_blue_blue.jpg	124_star_blue_yellow.jpg	11	22	124_star_blue_yellow.jpg	Yellow	1	Incongruent	2623	NA	123_star_blue_blue.jpg 124_star_blue_yellow.jpg	6	N	3.4188
Macaque	Monkey	Yellow	43598	11-38-26	MAC-Touch1	Adv Pref FC	Miyagi	Stroop_3_1_2.csv	6	290	2	None	3000	White	Scattered	109_fork_blue.jpg	110_fork_yellow.jpg	24	22	109_fork_blue.jpg	Blue	0	Control	1276	NA	109_fork_blue.jpg 110_fork_yellow.jpg	6	N	3.10585
Macaque	Monkey	Yellow	43598	11-38-31	MAC-Touch1	Adv Pref FC	Miyagi	Stroop_3_1_2.csv	7	290	2	None	3000	White	Scattered	121_square_yellow_blue.jpg	122_square_yellow_yellow.jpg	17	15	122_square_yellow_yellow.jpg	Yellow	1	Congruent	3880	NA	121_square_yellow_blue.jpg 122_square_yellow_yellow.jpg	6	N	3.58883
Macaque	Monkey	Yellow	43598	11-38-38	MAC-Touch1	Adv Pref FC	Miyagi	Stroop_3_1_2.csv	8	290	2	None	3000	White	Scattered	111_heart_blue_blue.jpg	112_heart_blue_yellow.jpg	22	21	111_heart_blue_blue.jpg	Blue	0	Incongruent	6773	NA	111_heart_blue_blue.jpg 112_heart_blue_yellow.jpg	6	Y	3.83078
Macaque	Monkey	Yellow	43598	11-38-48	MAC-Touch1	Adv Pref FC	Miyagi	Stroop_3_1_2.csv	9	290	2	None	3000	White	Scattered	125_star_yellow_blue.jpg	126_star_yellow_yellow.jpg	21	17	126_star_yellow_yellow.jpg	Yellow	1	Congruent	1438	NA	125_star_yellow_blue.jpg 126_star_yellow_yellow.jpg	6	N	3.15776
Macaque	Monkey	Yellow	43598	11-38-52	MAC-Touch1	Adv Pref FC	Miyagi	Stroop_3_1_2.csv	10	290	2	None	3000	White	Scattered	107_fidget_spinner_blue.jpg	108_fidget_spinner_yellow.jpg	23	18	108_fidget_spinner_yellow.jpg	Yellow	1	Control	4245	NA	107_fidget_spinner_blue.jpg 108_fidget_spinner_yellow.jpg	6	N	3.62788
Macaque	Monkey	Yellow	43598	11-38-59	MAC-Touch1	Adv Pref FC	Miyagi	Stroop_3_1_2.csv	11	290	2	None	3000	White	Scattered	121_square_yellow_blue.jpg	122_square_yellow_yellow.jpg	12	11	121_square_yellow_blue.jpg	Blue	0	Congruent	1724	NA	121_square_yellow_blue.jpg 122_square_yellow_yellow.jpg	6	N	3.23654
Macaque	Monkey	Yellow	43598	11-39-04	MAC-Touch1	Adv Pref FC	Miyagi	Stroop_3_1_2.csv	12	290	2	None	3000	White	Scattered	111_heart_blue_blue.jpg	112_heart_blue_yellow.jpg	18	13	112_heart_blue_yellow.jpg	Yellow	1	Incongruent	789	NA	111_heart_blue_blue.jpg 112_heart_blue_yellow.jpg	6	N	2.89708
Macaque	Monkey	Yellow	43598	11-39-08	MAC-Touch1	Adv Pref FC	Miyagi	Stroop_3_1_2.csv	13	290	2	None	3000	White	Scattered	119_square_blue_blue.jpg	120_square_blue_yellow.jpg	25	22	120_square_blue_yellow.jpg	Yellow	1	Incongruent	1714	NA	119_square_blue_blue.jpg 120_square_blue_yellow.jpg	6	N	3.23401
Macaque	Monkey	Yellow	43598	11-39-13	MAC-Touch1	Adv Pref FC	Miyagi	Stroop_3_1_2.csv	14	290	2	None	3000	White	Scattered	113_heart_yellow_blue.jpg	114_heart_yellow_yellow.jpg	21	16	113_heart_yellow_blue.jpg	Blue	0	Congruent	1960	NA	113_heart_yellow_blue.jpg 114_heart_yellow_yellow.jpg	6	N	3.29226
Macaque	Monkey	Yellow	43598	11-39-18	MAC-Touch1	Adv Pref FC	Miyagi	Stroop_3_1_2.csv	15	290	2	None	3000	White	Scattered	109_fork_blue.jpg	110_fork_yellow.jpg	16	18	110_fork_yellow.jpg	Yellow	1	Control	2657	NA	109_fork_blue.jpg 110_fork_yellow.jpg	6	N	3.42439
Macaque	Monkey	Yellow	43598	11-39-24	MAC-Touch1	Adv Pref FC	Miyagi	Stroop_3_1_2.csv	16	290	2	None	3000	White	Scattered	111_heart_blue_blue.jpg	112_heart_blue_yellow.jpg	24	22	112_heart_blue_yellow.jpg	Yellow	1	Incongruent	2265	NA	111_heart_blue_blue.jpg 112_heart_blue_yellow.jpg	6	N	3.35507
Macaque	Monkey	Yellow	43598	11-39-29	MAC-Touch1	Adv Pref FC	Miyagi	Stroop_3_1_2.csv	17	290	2	None	3000	White	Scattered	103_cross_blue_blue.JPG	104_cross_blue_yellow.JPG	17	21	103_cross_blue_blue.JPG	Blue	0	Incongruent	4386	NA	103_cross_blue_blue.JPG 104_cross_blue_yellow.JPG	6	N	3.64207
Macaque	Monkey	Yellow	43598	11-39-37	MAC-Touch1	Adv Pref FC	Miyagi	Stroop_3_1_2.csv	18	290	2	None	3000	White	Scattered	101_bicycle_blue.JPG	102_bicycle_yellow.JPG	25	11	102_bicycle_yellow.JPG	Yellow	1	Control	1673	NA	101_bicycle_blue.JPG 102_bicycle_yellow.JPG	6	N	3.2235
Macaque	Monkey	Yellow	43598	11-39-42	MAC-Touch1	Adv Pref FC	Miyagi	Stroop_3_1_2.csv	19	290	2	None	3000	White	Scattered	105_cross_yellow_blue.jpg	106_cross_yellow_yellow.jpg	22	21	105_cross_yellow_blue.jpg	Blue	0	Congruent	1879	NA	105_cross_yellow_blue.jpg 106_cross_yellow_yellow.jpg	6	N	3.27393
Macaque	Monkey	Yellow	43598	11-39-47	MAC-Touch1	Adv Pref FC	Miyagi	Stroop_3_1_2.csv	20	290	2	None	3000	White	Scattered	117_shovel_blue.jpg	118_shovel_yellow.jpg	22	24	118_shovel_yellow.jpg	Yellow	1	Control	1949	NA	117_shovel_blue.jpg 118_shovel_yellow.jpg	6	N	3.28981
Macaque	Monkey	Yellow	43598	11-39-52	MAC-Touch1	Adv Pref FC	Miyagi	Stroop_3_1_2.csv	21	290	2	None	3000	White	Scattered	125_star_yellow_blue.jpg	126_star_yellow_yellow.jpg	22	16	125_star_yellow_blue.jpg	Blue	0	Congruent	4277	NA	125_star_yellow_blue.jpg 126_star_yellow_yellow.jpg	6	N	3.63114
Macaque	Monkey	Yellow	43598	11-39-59	MAC-Touch1	Adv Pref FC	Miyagi	Stroop_3_1_2.csv	22	290	2	None	3000	White	Scattered	101_bicycle_blue.JPG	102_bicycle_yellow.JPG	15	17	102_bicycle_yellow.JPG	Yellow	1	Control	792	NA	101_bicycle_blue.JPG 102_bicycle_yellow.JPG	6	N	2.89873
Macaque	Monkey	Yellow	43598	11-40-03	MAC-Touch1	Adv Pref FC	Miyagi	Stroop_3_1_2.csv	23	290	2	None	3000	White	Scattered	113_heart_yellow_blue.jpg	114_heart_yellow_yellow.jpg	18	20	114_heart_yellow_yellow.jpg	Yellow	1	Congruent	3874	NA	113_heart_yellow_blue.jpg 114_heart_yellow_yellow.jpg	6	N	3.58816
Macaque	Monkey	Yellow	43598	11-40-10	MAC-Touch1	Adv Pref FC	Miyagi	Stroop_3_1_2.csv	24	290	2	None	3000	White	Scattered	119_square_blue_blue.jpg	120_square_blue_yellow.jpg	20	22	119_square_blue_blue.jpg	Blue	0	Incongruent	1761	NA	119_square_blue_blue.jpg 120_square_blue_yellow.jpg	6	N	3.24576
Macaque	Monkey	Yellow	43598	11-40-15	MAC-Touch1	Adv Pref FC	Miyagi	Stroop_3_1_2.csv	25	290	2	None	3000	White	Scattered	115_mug_blue.jpg	116_mug_yellow.jpg	13	15	116_mug_yellow.jpg	Yellow	1	Control	1353	NA	115_mug_blue.jpg 116_mug_yellow.jpg	6	N	3.1313
Macaque	Monkey	Yellow	43598	11-40-19	MAC-Touch1	Adv Pref FC	Miyagi	Stroop_3_1_2.csv	26	290	2	None	3000	White	Scattered	123_star_blue_blue.jpg	124_star_blue_yellow.jpg	11	22	124_star_blue_yellow.jpg	Yellow	1	Incongruent	4896	NA	123_star_blue_blue.jpg 124_star_blue_yellow.jpg	6	N	3.68984
Macaque	Monkey	Yellow	43598	11-40-27	MAC-Touch1	Adv Pref FC	Miyagi	Stroop_3_1_2.csv	27	290	2	None	3000	White	Scattered	105_cross_yellow_blue.jpg	106_cross_yellow_yellow.jpg	25	23	105_cross_yellow_blue.jpg	Blue	0	Congruent	3441	NA	105_cross_yellow_blue.jpg 106_cross_yellow_yellow.jpg	6	N	3.53668
Macaque	Monkey	Yellow	43598	11-40-34	MAC-Touch1	Adv Pref FC	Miyagi	Stroop_3_1_2.csv	28	290	2	None	3000	White	Scattered	107_fidget_spinner_blue.jpg	108_fidget_spinner_yellow.jpg	12	18	108_fidget_spinner_yellow.jpg	Yellow	1	Control	926	NA	107_fidget_spinner_blue.jpg 108_fidget_spinner_yellow.jpg	6	N	2.96661
Macaque	Monkey	Yellow	43598	11-40-38	MAC-Touch1	Adv Pref FC	Miyagi	Stroop_3_1_2.csv	29	290	2	None	3000	White	Scattered	119_square_blue_blue.jpg	120_square_blue_yellow.jpg	24	23	120_square_blue_yellow.jpg	Yellow	1	Incongruent	1541	NA	119_square_blue_blue.jpg 120_square_blue_yellow.jpg	6	N	3.1878
Macaque	Monkey	Yellow	43598	11-40-43	MAC-Touch1	Adv Pref FC	Miyagi	Stroop_3_1_2.csv	30	290	2	None	3000	White	Scattered	115_mug_blue.jpg	116_mug_yellow.jpg	25	22	115_mug_blue.jpg	Blue	0	Control	1219	NA	115_mug_blue.jpg 116_mug_yellow.jpg	6	N	3.086
Macaque	Monkey	Yellow	43599	41980	MAC-Touch1	Adv Pref FC	Miyagi	Stroop_3_1_3.csv	1	290	2	None	3000	White	Scattered	123_star_blue_blue.jpg	124_star_blue_yellow.jpg	25	21	124_star_blue_yellow.jpg	Yellow	1	Incongruent	1619	NA	123_star_blue_blue.jpg 124_star_blue_yellow.jpg	7	N	3.20925
Macaque	Monkey	Yellow	43599	43806	MAC-Touch1	Adv Pref FC	Miyagi	Stroop_3_1_3.csv	2	290	2	None	3000	White	Scattered	115_mug_blue.jpg	116_mug_yellow.jpg	16	15	115_mug_blue.jpg	Blue	0	Control	2785	NA	115_mug_blue.jpg 116_mug_yellow.jpg	7	N	3.44483
Macaque	Monkey	Yellow	43599	45998	MAC-Touch1	Adv Pref FC	Miyagi	Stroop_3_1_3.csv	3	290	2	None	3000	White	Scattered	105_cross_yellow_blue.jpg	106_cross_yellow_yellow.jpg	18	16	105_cross_yellow_blue.jpg	Blue	0	Congruent	1536	NA	105_cross_yellow_blue.jpg 106_cross_yellow_yellow.jpg	7	N	3.18639
Macaque	Monkey	Yellow	43599	47459	MAC-Touch1	Adv Pref FC	Miyagi	Stroop_3_1_3.csv	4	290	2	None	3000	White	Scattered	109_fork_blue.jpg	110_fork_yellow.jpg	11	13	110_fork_yellow.jpg	Yellow	1	Control	1121	NA	109_fork_blue.jpg 110_fork_yellow.jpg	7	N	3.04961
Macaque	Monkey	Yellow	43599	12395	MAC-Touch1	Adv Pref FC	Miyagi	Stroop_3_1_3.csv	5	290	2	None	3000	White	Scattered	123_star_blue_blue.jpg	124_star_blue_yellow.jpg	12	22	124_star_blue_yellow.jpg	Yellow	1	Incongruent	5078	NA	123_star_blue_blue.jpg 124_star_blue_yellow.jpg	7	N	3.70569
Macaque	Monkey	Yellow	43599	12031	MAC-Touch1	Adv Pref FC	Miyagi	Stroop_3_1_3.csv	6	290	2	None	3000	White	Scattered	113_heart_yellow_blue.jpg	114_heart_yellow_yellow.jpg	23	20	114_heart_yellow_yellow.jpg	Yellow	1	Congruent	2000	NA	113_heart_yellow_blue.jpg 114_heart_yellow_yellow.jpg	7	N	3.30103
Macaque	Monkey	Yellow	43599	13857	MAC-Touch1	Adv Pref FC	Miyagi	Stroop_3_1_3.csv	7	290	2	None	3000	White	Scattered	117_shovel_blue.jpg	118_shovel_yellow.jpg	25	24	118_shovel_yellow.jpg	Yellow	1	Control	1174	NA	117_shovel_blue.jpg 118_shovel_yellow.jpg	7	N	3.06967
Macaque	Monkey	Yellow	43599	15683	MAC-Touch1	Adv Pref FC	Miyagi	Stroop_3_1_3.csv	8	290	2	None	3000	White	Scattered	125_star_yellow_blue.jpg	126_star_yellow_yellow.jpg	22	20	126_star_yellow_yellow.jpg	Yellow	1	Congruent	1234	NA	125_star_yellow_blue.jpg 126_star_yellow_yellow.jpg	7	N	3.09132
Macaque	Monkey	Yellow	43599	17144	MAC-Touch1	Adv Pref FC	Miyagi	Stroop_3_1_3.csv	9	290	2	None	3000	White	Scattered	109_fork_blue.jpg	110_fork_yellow.jpg	19	23	110_fork_yellow.jpg	Yellow	1	Control	3397	NA	109_fork_blue.jpg 110_fork_yellow.jpg	7	N	3.5311
Macaque	Monkey	Yellow	43599	19701	MAC-Touch1	Adv Pref FC	Miyagi	Stroop_3_1_3.csv	10	290	2	None	3000	White	Scattered	113_heart_yellow_blue.jpg	114_heart_yellow_yellow.jpg	24	11	113_heart_yellow_blue.jpg	Blue	0	Congruent	1144	NA	113_heart_yellow_blue.jpg 114_heart_yellow_yellow.jpg	7	N	3.05843
Macaque	Monkey	Yellow	43599	21162	MAC-Touch1	Adv Pref FC	Miyagi	Stroop_3_1_3.csv	11	290	2	None	3000	White	Scattered	111_heart_blue_blue.jpg	112_heart_blue_yellow.jpg	22	21	112_heart_blue_yellow.jpg	Yellow	1	Incongruent	2295	NA	111_heart_blue_blue.jpg 112_heart_blue_yellow.jpg	7	N	3.36078
Macaque	Monkey	Yellow	43599	37599	MAC-Touch1	Adv Pref FC	Miyagi	Stroop_3_1_3.csv	12	290	2	None	3000	White	Scattered	119_square_blue_blue.jpg	120_square_blue_yellow.jpg	11	23	120_square_blue_yellow.jpg	Yellow	1	Incongruent	2023	NA	119_square_blue_blue.jpg 120_square_blue_yellow.jpg	7	N	3.306
Macaque	Monkey	Yellow	43599	39425	MAC-Touch1	Adv Pref FC	Miyagi	Stroop_3_1_3.csv	13	290	2	None	3000	White	Scattered	105_cross_yellow_blue.jpg	106_cross_yellow_yellow.jpg	18	14	106_cross_yellow_yellow.jpg	Yellow	1	Congruent	1767	NA	105_cross_yellow_blue.jpg 106_cross_yellow_yellow.jpg	7	N	3.24724
Macaque	Monkey	Yellow	43599	41252	MAC-Touch1	Adv Pref FC	Miyagi	Stroop_3_1_3.csv	14	290	2	None	3000	White	Scattered	101_bicycle_blue.JPG	102_bicycle_yellow.JPG	21	14	102_bicycle_yellow.JPG	Yellow	1	Control	1844	NA	101_bicycle_blue.JPG 102_bicycle_yellow.JPG	7	N	3.26576
Macaque	Monkey	Yellow	43599	43078	MAC-Touch1	Adv Pref FC	Miyagi	Stroop_3_1_3.csv	15	290	2	None	3000	White	Scattered	119_square_blue_blue.jpg	120_square_blue_yellow.jpg	19	22	120_square_blue_yellow.jpg	Yellow	1	Incongruent	1413	NA	119_square_blue_blue.jpg 120_square_blue_yellow.jpg	7	N	3.15014
Macaque	Monkey	Yellow	43599	44904	MAC-Touch1	Adv Pref FC	Miyagi	Stroop_3_1_3.csv	16	290	2	None	3000	White	Scattered	105_cross_yellow_blue.jpg	106_cross_yellow_yellow.jpg	23	20	106_cross_yellow_yellow.jpg	Yellow	1	Congruent	1752	NA	105_cross_yellow_blue.jpg 106_cross_yellow_yellow.jpg	7	N	3.24353
Macaque	Monkey	Yellow	43599	46730	MAC-Touch1	Adv Pref FC	Miyagi	Stroop_3_1_3.csv	17	290	2	None	3000	White	Scattered	103_cross_blue_blue.JPG	104_cross_blue_yellow.JPG	23	11	104_cross_blue_yellow.JPG	Yellow	1	Incongruent	5911	NA	103_cross_blue_blue.JPG 104_cross_blue_yellow.JPG	7	Y	3.77166
Macaque	Monkey	Yellow	43599	13493	MAC-Touch1	Adv Pref FC	Miyagi	Stroop_3_1_3.csv	18	290	2	None	3000	White	Scattered	115_mug_blue.jpg	116_mug_yellow.jpg	17	21	116_mug_yellow.jpg	Yellow	1	Control	1679	NA	115_mug_blue.jpg 116_mug_yellow.jpg	7	N	3.22505
Macaque	Monkey	Yellow	43599	15319	MAC-Touch1	Adv Pref FC	Miyagi	Stroop_3_1_3.csv	19	290	2	None	3000	White	Scattered	125_star_yellow_blue.jpg	126_star_yellow_yellow.jpg	13	11	126_star_yellow_yellow.jpg	Yellow	1	Congruent	8343	NA	125_star_yellow_blue.jpg 126_star_yellow_yellow.jpg	7	Y	3.92132
Macaque	Monkey	Yellow	43599	19337	MAC-Touch1	Adv Pref FC	Miyagi	Stroop_3_1_3.csv	20	290	2	None	3000	White	Scattered	107_fidget_spinner_blue.jpg	108_fidget_spinner_yellow.jpg	16	23	108_fidget_spinner_yellow.jpg	Yellow	1	Control	1315	NA	107_fidget_spinner_blue.jpg 108_fidget_spinner_yellow.jpg	7	N	3.11893
Macaque	Monkey	Yellow	43599	20798	MAC-Touch1	Adv Pref FC	Miyagi	Stroop_3_1_3.csv	21	290	2	None	3000	White	Scattered	123_star_blue_blue.jpg	124_star_blue_yellow.jpg	21	12	124_star_blue_yellow.jpg	Yellow	1	Incongruent	1294	NA	123_star_blue_blue.jpg 124_star_blue_yellow.jpg	7	N	3.11193
Macaque	Monkey	Yellow	43599	37235	MAC-Touch1	Adv Pref FC	Miyagi	Stroop_3_1_3.csv	22	290	2	None	3000	White	Scattered	101_bicycle_blue.JPG	102_bicycle_yellow.JPG	17	23	102_bicycle_yellow.JPG	Yellow	1	Control	1362	NA	101_bicycle_blue.JPG 102_bicycle_yellow.JPG	7	N	3.13418
Macaque	Monkey	Yellow	43599	38696	MAC-Touch1	Adv Pref FC	Miyagi	Stroop_3_1_3.csv	23	290	2	None	3000	White	Scattered	121_square_yellow_blue.jpg	122_square_yellow_yellow.jpg	16	12	122_square_yellow_yellow.jpg	Yellow	1	Congruent	2221	NA	121_square_yellow_blue.jpg 122_square_yellow_yellow.jpg	7	N	3.34655
Macaque	Monkey	Yellow	43599	40887	MAC-Touch1	Adv Pref FC	Miyagi	Stroop_3_1_3.csv	24	290	2	None	3000	White	Scattered	111_heart_blue_blue.jpg	112_heart_blue_yellow.jpg	13	16	111_heart_blue_blue.jpg	Blue	0	Incongruent	3165	NA	111_heart_blue_blue.jpg 112_heart_blue_yellow.jpg	7	N	3.50037
Macaque	Monkey	Yellow	43599	43079	MAC-Touch1	Adv Pref FC	Miyagi	Stroop_3_1_3.csv	25	290	2	None	3000	White	Scattered	107_fidget_spinner_blue.jpg	108_fidget_spinner_yellow.jpg	13	21	107_fidget_spinner_blue.jpg	Blue	0	Control	1328	NA	107_fidget_spinner_blue.jpg 108_fidget_spinner_yellow.jpg	7	N	3.1232
Macaque	Monkey	Yellow	43599	44540	MAC-Touch1	Adv Pref FC	Miyagi	Stroop_3_1_3.csv	26	290	2	None	3000	White	Scattered	103_cross_blue_blue.JPG	104_cross_blue_yellow.JPG	11	18	104_cross_blue_yellow.JPG	Yellow	1	Incongruent	1250	NA	103_cross_blue_blue.JPG 104_cross_blue_yellow.JPG	7	N	3.09691
Macaque	Monkey	Yellow	43599	46366	MAC-Touch1	Adv Pref FC	Miyagi	Stroop_3_1_3.csv	27	290	2	None	3000	White	Scattered	125_star_yellow_blue.jpg	126_star_yellow_yellow.jpg	16	12	126_star_yellow_yellow.jpg	Yellow	1	Congruent	1555	NA	125_star_yellow_blue.jpg 126_star_yellow_yellow.jpg	7	N	3.19173
Macaque	Monkey	Yellow	43599	11302	MAC-Touch1	Adv Pref FC	Miyagi	Stroop_3_1_3.csv	28	290	2	None	3000	White	Scattered	117_shovel_blue.jpg	118_shovel_yellow.jpg	17	24	118_shovel_yellow.jpg	Yellow	1	Control	1346	NA	117_shovel_blue.jpg 118_shovel_yellow.jpg	7	N	3.12905
Macaque	Monkey	Yellow	43599	13128	MAC-Touch1	Adv Pref FC	Miyagi	Stroop_3_1_3.csv	29	290	2	None	3000	White	Scattered	121_square_yellow_blue.jpg	122_square_yellow_yellow.jpg	17	24	122_square_yellow_yellow.jpg	Yellow	1	Congruent	4107	NA	121_square_yellow_blue.jpg 122_square_yellow_yellow.jpg	7	N	3.61352
Macaque	Monkey	Yellow	43599	15685	MAC-Touch1	Adv Pref FC	Miyagi	Stroop_3_1_3.csv	30	290	2	None	3000	White	Scattered	103_cross_blue_blue.JPG	104_cross_blue_yellow.JPG	21	13	104_cross_blue_yellow.JPG	Yellow	1	Incongruent	3809	NA	103_cross_blue_blue.JPG 104_cross_blue_yellow.JPG	7	N	3.58081
Macaque	Monkey	Yellow	43600	19338	MAC-Touch1	Adv Pref FC	Miyagi	Stroop_3_1_4.csv	1	290	2	None	3000	White	Scattered	119_square_blue_blue.jpg	120_square_blue_yellow.jpg	14	16	119_square_blue_blue.jpg	Blue	0	Incongruent	1692	NA	119_square_blue_blue.jpg 120_square_blue_yellow.jpg	8	N	3.2284
Macaque	Monkey	Yellow	43600	21164	MAC-Touch1	Adv Pref FC	Miyagi	Stroop_3_1_4.csv	2	290	2	None	3000	White	Scattered	125_star_yellow_blue.jpg	126_star_yellow_yellow.jpg	14	22	126_star_yellow_yellow.jpg	Yellow	1	Congruent	3995	NA	125_star_yellow_blue.jpg 126_star_yellow_yellow.jpg	8	N	3.60152
Macaque	Monkey	Yellow	43600	38332	MAC-Touch1	Adv Pref FC	Miyagi	Stroop_3_1_4.csv	3	290	2	None	3000	White	Scattered	111_heart_blue_blue.jpg	112_heart_blue_yellow.jpg	16	23	111_heart_blue_blue.jpg	Blue	0	Incongruent	1337	NA	111_heart_blue_blue.jpg 112_heart_blue_yellow.jpg	8	N	3.12613
Macaque	Monkey	Yellow	43600	39793	MAC-Touch1	Adv Pref FC	Miyagi	Stroop_3_1_4.csv	4	290	2	None	3000	White	Scattered	105_cross_yellow_blue.jpg	106_cross_yellow_yellow.jpg	24	13	106_cross_yellow_yellow.jpg	Yellow	1	Congruent	2057	NA	105_cross_yellow_blue.jpg 106_cross_yellow_yellow.jpg	8	N	3.31323
Macaque	Monkey	Yellow	43600	41984	MAC-Touch1	Adv Pref FC	Miyagi	Stroop_3_1_4.csv	5	290	2	None	3000	White	Scattered	115_mug_blue.jpg	116_mug_yellow.jpg	14	19	116_mug_yellow.jpg	Yellow	1	Control	2448	NA	115_mug_blue.jpg 116_mug_yellow.jpg	8	N	3.38881
Macaque	Monkey	Yellow	43600	43810	MAC-Touch1	Adv Pref FC	Miyagi	Stroop_3_1_4.csv	6	290	2	None	3000	White	Scattered	113_heart_yellow_blue.jpg	114_heart_yellow_yellow.jpg	12	23	113_heart_yellow_blue.jpg	Blue	0	Congruent	5068	NA	113_heart_yellow_blue.jpg 114_heart_yellow_yellow.jpg	8	N	3.70484
Macaque	Monkey	Yellow	43600	46732	MAC-Touch1	Adv Pref FC	Miyagi	Stroop_3_1_4.csv	7	290	2	None	3000	White	Scattered	103_cross_blue_blue.JPG	104_cross_blue_yellow.JPG	19	16	104_cross_blue_yellow.JPG	Yellow	1	Incongruent	887	NA	103_cross_blue_blue.JPG 104_cross_blue_yellow.JPG	8	N	2.94792
Macaque	Monkey	Yellow	43600	11668	MAC-Touch1	Adv Pref FC	Miyagi	Stroop_3_1_4.csv	8	290	2	None	3000	White	Scattered	101_bicycle_blue.JPG	102_bicycle_yellow.JPG	16	24	102_bicycle_yellow.JPG	Yellow	1	Control	2745	NA	101_bicycle_blue.JPG 102_bicycle_yellow.JPG	8	N	3.43854
[truncated: 975 more rows]

## Sheet: TestPhase2
SpeciesRaw	Species	Color	Condition	Date	Time	computer	test	subject	Folder	Input file	Trial number	TrialCumulative	Image size	# of stimuli	MTL	ITI	Reward ratio	Reward ratio_2	Background	Image location	Image 1	Image 2	Image 3	Image 4	Image 1 location	Image 2 location	Image 3 location	Image 4 location	Image chosen	Border chosen	Correct	TrialType	TransitionTrial	Latency	Rewarded	Experimenter	Image pairing	Session	ExcludeLatency	LatencyLog
[truncated: 2,370 more rows]
